# Supplementary material for: Could Protein Content of Urinary Extracellular Vesicles be Useful to Detect Alcoholic Liver Disease and Assess Hepatocarcinoma Risk?
Source: Preprints.org preprint supplement (doi:10.20944/preprints202102.0069.v1), 2021-02-01
Supplement: Supplementary file 1 [file supplementary]

## Sheet: Synapt-Mascot
	Spectral counts			Spectral counts																		Spectral counts			Spectral counts
					Control						Cirrhotic
	Accession	Entry name	prot_desc	prot_acc	1	2	3	4	5	6	7	8	10	12	13	SUM Ctrl	SUM Cirro	In Ctrl	In Cirro	SUM		Accession	In Ctrl		Accession	In Cirro
1	Q9NZZ3	CHMP5_HUMAN	Charged multivesicular body protein 5 OS=Homo sapiens GN=CHMP5 PE=1 SV=1	CHMP5_HUMAN	6	14	14	14	12	15	41	41	33	23	27	27	165	1	1	2		Q9NZZ3	1		Q9NZZ3	1
1	Q5VW32	BROX_HUMAN	BRO1 domain-containing protein BROX OS=Homo sapiens GN=BROX PE=1 SV=1	BROX_HUMAN	14	8	7	16	12	11	23	14	19	13	11	23	80	1	1	2		Q5VW32	1		Q5VW32	1
1	P02768	ALBU_HUMAN	Serum albumin OS=Homo sapiens GN=ALB PE=1 SV=2	ALBU_HUMAN	45	62	38	70	25	63	104	48	44	204	68	88	468	1	1	2		P02768	1		P02768	1
1	P15144	AMPN_HUMAN	Aminopeptidase N OS=Homo sapiens GN=ANPEP PE=1 SV=4	AMPN_HUMAN	18	55	5	29	12	61	59	48	41	106	23	73	277	1	1	2		P15144	1		P15144	1
1	Q9NQ84	GPC5C_HUMAN	G-protein coupled receptor family C group 5 member C OS=Homo sapiens GN=GPRC5C PE=1 SV=2	GPC5C_HUMAN	13	15	16	21	13	22	16	14	20	21	19	35	90	1	1	2		Q9NQ84	1		Q9NQ84	1
1	Q12929	EPS8_HUMAN	Epidermal growth factor receptor kinase substrate 8 OS=Homo sapiens GN=EPS8 PE=1 SV=1	EPS8_HUMAN	6	4	11	14	8	12	10	11	16	15	19	20	71	1	1	2		Q12929	1		Q12929	1
1	P01133	EGF_HUMAN	Pro-epidermal growth factor OS=Homo sapiens GN=EGF PE=1 SV=2	EGF_HUMAN	15	176	38	87	10	10	56	44	98	16	17	20	231	1	1	2		P01133	1		P01133	1
1	P07911	UROM_HUMAN	Uromodulin OS=Homo sapiens GN=UMOD PE=1 SV=1	UROM_HUMAN	48	77	27	43	14	40	26	43	40	30	95	54	234	1	1	2		P07911	1		P07911	1
1	O43633	CHM2A_HUMAN	Charged multivesicular body protein 2a OS=Homo sapiens GN=CHMP2A PE=1 SV=1	CHM2A_HUMAN	10	2	8	8	3	12	17	16	14	6	6	15	59	1	1	2		O43633	1		O43633	1
1	P98164	LRP2_HUMAN	Low-density lipoprotein receptor-related protein 2 OS=Homo sapiens GN=LRP2 PE=1 SV=3	LRP2_HUMAN	3	87	23	77	12	13	71	39	29	239	27	25	405	1	1	2		P98164	1		P98164	1
1	P62979	RS27A_HUMAN	Ubiquitin-40S ribosomal protein S27a OS=Homo sapiens GN=RPS27A PE=1 SV=2	RS27A_HUMAN	10	11	14	16	0	17	19	16	10	26	16	17	87	1	1	2		P62979	1		P62979	1
1	P01876	IGHA1_HUMAN	Ig alpha-1 chain C region OS=Homo sapiens GN=IGHA1 PE=1 SV=2	IGHA1_HUMAN	4	69	12	52	6	25	56	46	47	67	29	31	245	1	1	2		P01876	1		P01876	1
1	P26038	MOES_HUMAN	Moesin OS=Homo sapiens GN=MSN PE=1 SV=3	MOES_HUMAN	5	10	14	16	7	10	22	9	13	25	28	17	97	1	1	2		P26038	1		P26038	1
1	P29972	AQP1_HUMAN	Aquaporin-1 OS=Homo sapiens GN=AQP1 PE=1 SV=3	AQP1_HUMAN	3	5	7	5	3	13	17	11	12	8	8	16	56	1	1	2		P29972	1		P29972	1
1	Q08380	LG3BP_HUMAN	Galectin-3-binding protein OS=Homo sapiens GN=LGALS3BP PE=1 SV=1	LG3BP_HUMAN	15	41	20	51	8	25	34	29	50	52	23	33	188	1	1	2		Q08380	1		Q08380	1
1	P15311	EZRI_HUMAN	Ezrin OS=Homo sapiens GN=EZR PE=1 SV=4	EZRI_HUMAN	8	13	14	21	4	22	28	17	15	21	21	26	102	1	1	2		P15311	1		P15311	1
1	Q9NZH0	GPC5B_HUMAN	G-protein coupled receptor family C group 5 member B OS=Homo sapiens GN=GPRC5B PE=2 SV=2	GPC5B_HUMAN	7	8	15	10	8	9	13	14	15	9	19	17	70	1	1	2		Q9NZH0	1		Q9NZH0	1
1	P08473	NEP_HUMAN	Neprilysin OS=Homo sapiens GN=MME PE=1 SV=2	NEP_HUMAN	11	38	6	6	6	27	15	18	15	69	11	33	128	1	1	2		P08473	1		P08473	1
1	O60494	CUBN_HUMAN	Cubilin OS=Homo sapiens GN=CUBN PE=1 SV=5	KIF12_HUMAN	3	78	20	42	11	23	44	44	41	66	21	34	216	1	1	2		O60494	1		O60494	1
1	Q8WUM4	PDC6I_HUMAN	Programmed cell death 6-interacting protein OS=Homo sapiens GN=PDCD6IP PE=1 SV=1	CUBN_HUMAN	20	17	7	11	15	33	18	10	11	38	9	48	86	1	1	2		Q8WUM4	1		Q8WUM4	1
1	P01042	KNG1_HUMAN	Kininogen-1 OS=Homo sapiens GN=KNG1 PE=1 SV=2	MB12A_HUMAN	19	86	33	86	2	14	52	50	45	11	28	16	186	1	1	2		P01042	1		P01042	1
1	O43490	PROM1_HUMAN	Prominin-1 OS=Homo sapiens GN=PROM1 PE=1 SV=1	XPP2_HUMAN	11	23	5	11	1	27	7	4	7	45	6	28	69	1	1	2		O43490	1		O43490	1
1	P01834	IGKC_HUMAN	Ig kappa chain C region OS=Homo sapiens GN=IGKC PE=1 SV=1	VPS4B_HUMAN	6	75	23	60	0	40	61	62	43	106	23	40	295	1	1	2		P01834	1		P01834	1
1	P60709	ACTB_HUMAN	Actin, cytoplasmic 1 OS=Homo sapiens GN=ACTB PE=1 SV=1	PDC6I_HUMAN	9	39	17	23	10	22	24	20	11	39	16	32	110	1	1	2		P60709	1		P60709	1
1	P11142	HSP7C_HUMAN	Heat shock cognate 71 kDa protein OS=Homo sapiens GN=HSPA8 PE=1 SV=1	KNG1_HUMAN	11	20	12	9	4	23	16	13	14	29	14	27	86	1	1	2		P11142	1		P11142	1
1	P01833	PIGR_HUMAN	Polymeric immunoglobulin receptor OS=Homo sapiens GN=PIGR PE=1 SV=4	PROM1_HUMAN	5	45	17	35	7	17	31	27	20	33	19	24	130	1	1	2		P01833	1		P01833	1
1	P08183	MDR1_HUMAN	Multidrug resistance protein 1 OS=Homo sapiens GN=ABCB1 PE=1 SV=3	BASP1_HUMAN	9	2	3	6	2	17	7	7	14	27	6	19	61	1	1	2		P08183	1		P08183	1
1	P09525	ANXA4_HUMAN	Annexin A4 OS=Homo sapiens GN=ANXA4 PE=1 SV=4	DPP4_HUMAN	7	5	4	3	3	12	12	8	5	14	4	15	43	1	1	2		P09525	1		P09525	1
1	Q93088	BHMT1_HUMAN	Betaine--homocysteine S-methyltransferase 1 OS=Homo sapiens GN=BHMT PE=1 SV=2	ES8L2_HUMAN	3	26	5	10	1	7	11	11	5	9	5	8	41	1	1	2		Q93088	1		Q93088	1
1	Q9UN37	VPS4A_HUMAN	Vacuolar protein sorting-associated protein 4A OS=Homo sapiens GN=VPS4A PE=1 SV=1	IGKC_HUMAN	5	5	2	2	18	11	8	3	6	10	3	29	30	1	1	2		Q9UN37	1		Q9UN37	1
1	P14618	KPYM_HUMAN	Pyruvate kinase PKM OS=Homo sapiens GN=PKM PE=1 SV=4	ACTB_HUMAN	5	33	10	11	6	21	10	24	17	7	7	27	65	1	1	2		P14618	1		P14618	1
1	P53990	IST1_HUMAN	IST1 homolog OS=Homo sapiens GN=IST1 PE=1 SV=1	HSP7C_HUMAN	11	15	3	7	5	17	12	6	7	26	5	22	56	1	1	2		P53990	1		P53990	1
1	Q9H444	CHM4B_HUMAN	Charged multivesicular body protein 4b OS=Homo sapiens GN=CHMP4B PE=1 SV=1	PIGR_HUMAN	5	2	3	5	8	10	5	6	7	8	5	18	31	1	1	2		Q9H444	1		Q9H444	1
1	P62937	PPIA_HUMAN	Peptidyl-prolyl cis-trans isomerase A OS=Homo sapiens GN=PPIA PE=1 SV=2	MDR1_HUMAN	9	10	5	4	8	11	3	4	6	18	6	19	37	1	1	2		P62937	1		P62937	1
1	P50995	ANX11_HUMAN	Annexin A11 OS=Homo sapiens GN=ANXA11 PE=1 SV=1	ANXA4_HUMAN	15	11	13	5	2	20	5	5	14	36	14	22	74	1	1	2		P50995	1		P50995	1
1	P15941	MUC1_HUMAN	Mucin-1 OS=Homo sapiens GN=MUC1 PE=1 SV=3	BHMT1_HUMAN	4	12	5	5	5	8	6	6	7	21	5	13	45	1	1	2		P15941	1		P15941	1
1	P07195	LDHB_HUMAN	L-lactate dehydrogenase B chain OS=Homo sapiens GN=LDHB PE=1 SV=2	VPS4A_HUMAN	9	23	12	14	4	9	15	16	14	20	5	13	70	1	1	2		P07195	1		P07195	1
1	P16444	DPEP1_HUMAN	Dipeptidase 1 OS=Homo sapiens GN=DPEP1 PE=1 SV=3	GGT1_HUMAN	4	31	3	4	0	10	14	10	10	25	3	10	62	1	1	2		P16444	1		P16444	1
1	P35241	RADI_HUMAN	Radixin OS=Homo sapiens GN=RDX PE=1 SV=1	SMO_HUMAN	4	6	5	8	0	13	8	7	7	12	11	13	45	1	1	2		P35241	1		P35241	1
1	O00560	SDCB1_HUMAN	Syntenin-1 OS=Homo sapiens GN=SDCBP PE=1 SV=1	MITD1_HUMAN	9	14	4	4	1	18	8	4	7	19	9	19	47	1	1	2		O00560	1		O00560	1
1	Q9Y6W3	CAN7_HUMAN	Calpain-7 OS=Homo sapiens GN=CAPN7 PE=1 SV=1	KPYM_HUMAN	14	9	2	5	7	20	8	5	4	10	6	27	33	1	1	2		Q9Y6W3	1		Q9Y6W3	1
1	P05090	APOD_HUMAN	Apolipoprotein D OS=Homo sapiens GN=APOD PE=1 SV=1	IST1_HUMAN	23	23	17	31	4	20	22	20	29	3	11	24	85	1	1	2		P05090	1		P05090	1
1	P10909	CLUS_HUMAN	Clusterin OS=Homo sapiens GN=CLU PE=1 SV=1	CHM4B_HUMAN	9	67	5	36	7	9	16	11	18	17	7	16	69	1	1	2		P10909	1		P10909	1
1	P27105	STOM_HUMAN	Erythrocyte band 7 integral membrane protein OS=Homo sapiens GN=STOM PE=1 SV=3	TBB4B_HUMAN	9	5	5	3	0	12	4	4	15	17	10	12	50	1	1	2		P27105	1		P27105	1
1	Q9UQN3	CHM2B_HUMAN	Charged multivesicular body protein 2b OS=Homo sapiens GN=CHMP2B PE=1 SV=1	FOLR1_HUMAN	3	2	6	5	0	7	11	7	5	4	5	7	32	1	1	2		Q9UQN3	1		Q9UQN3	1
1	P06733	ENOA_HUMAN	Alpha-enolase OS=Homo sapiens GN=ENO1 PE=1 SV=2	PPIA_HUMAN	5	49	4	6	2	16	7	4	5	20	3	18	39	1	1	2		P06733	1		P06733	1
1	P60953	CDC42_HUMAN	Cell division control protein 42 homolog OS=Homo sapiens GN=CDC42 PE=1 SV=2	ANX11_HUMAN	5	5	4	2	13	4	7	6	6	14	6	17	39	1	1	2		P60953	1		P60953	1
1	Q8IWA5	CTL2_HUMAN	Choline transporter-like protein 2 OS=Homo sapiens GN=SLC44A2 PE=1 SV=3	CAPG_HUMAN	4	3	5	6	0	4	8	4	5	9	8	4	34	1	1	2		Q8IWA5	1		Q8IWA5	1
1	Q9UHR4	BI2L1_HUMAN	Brain-specific angiogenesis inhibitor 1-associated protein 2-like protein 1 OS=Homo sapiens GN=BAIAP2L1 PE=1 SV=2	CHM4C_HUMAN	2	2	3	3	0	3	3	4	6	3	6	3	22	1	1	2		Q9UHR4	1		Q9UHR4	1
1	Q7LBR1	CHM1B_HUMAN	Charged multivesicular body protein 1b OS=Homo sapiens GN=CHMP1B PE=1 SV=1	OSTP_HUMAN	12	5	5	2	7	9	9	6	7	5	2	16	29	1	1	2		Q7LBR1	1		Q7LBR1	1
1	Q13621	S12A1_HUMAN	Solute carrier family 12 member 1 OS=Homo sapiens GN=SLC12A1 PE=1 SV=2	RNAS1_HUMAN	10	3	2	4	2	9	9	2	4	13	3	11	31	1	1	2		Q13621	1		Q13621	1
1	O00592	PODXL_HUMAN	Podocalyxin OS=Homo sapiens GN=PODXL PE=1 SV=2	GTR5_HUMAN	9	8	5	7	1	7	9	6	10	6	10	8	41	1	1	2		O00592	1		O00592	1
1	Q99816	TS101_HUMAN	Tumor susceptibility gene 101 protein OS=Homo sapiens GN=TSG101 PE=1 SV=2	MUC1_HUMAN	7	4	6	10	1	12	6	7	5	11	4	13	33	1	1	2		Q99816	1		Q99816	1
1	P0CG05	LAC2_HUMAN	Ig lambda-2 chain C regions OS=Homo sapiens GN=IGLC2 PE=1 SV=1	PEPL_HUMAN	4	28	10	12	0	20	20	17	16	37	12	20	102	1	1	2		P0CG05	1		P0CG05	1
1	P50895	BCAM_HUMAN	Basal cell adhesion molecule OS=Homo sapiens GN=BCAM PE=1 SV=2	LDHB_HUMAN	3	6	4	15	3	7	9	9	17	3	5	10	43	1	1	2		P50895	1		P50895	1
1	O96009	NAPSA_HUMAN	Napsin-A OS=Homo sapiens GN=NAPSA PE=1 SV=1	CALM_HUMAN	3	7	3	3	0	5	8	6	8	9	4	5	35	1	1	2		O96009	1		O96009	1
1	P00734	THRB_HUMAN	Prothrombin OS=Homo sapiens GN=F2 PE=1 SV=2	DPEP1_HUMAN	2	20	8	13	0	2	7	13	7	8	7	2	42	1	1	2		P00734	1		P00734	1
1	P01766	HV305_HUMAN	Ig heavy chain V-III region BRO OS=Homo sapiens PE=1 SV=1	RADI_HUMAN	3	5	4	7	0	2	7	7	6	14	8	2	42	1	1	2		P01766	1		P01766	1
1	P07355	ANXA2_HUMAN	Annexin A2 OS=Homo sapiens GN=ANXA2 PE=1 SV=2	KINH_HUMAN	2	21	2	12	0	12	4	14	9	17	4	12	48	1	1	2		P07355	1		P07355	1
1	P00558	PGK1_HUMAN	Phosphoglycerate kinase 1 OS=Homo sapiens GN=PGK1 PE=1 SV=3	GBB2_HUMAN	2	30	3	4	2	13	3	4	3	10	3	15	23	1	1	2		P00558	1		P00558	1
1	P40925	MDHC_HUMAN	Malate dehydrogenase, cytoplasmic OS=Homo sapiens GN=MDH1 PE=1 SV=4	GNAI1_HUMAN	5	12	4	3	3	6	5	4	5	6	4	9	24	1	1	2		P40925	1		P40925	1
1	P02787	TRFE_HUMAN	Serotransferrin OS=Homo sapiens GN=TF PE=1 SV=3	HSP72_HUMAN	6	14	15	25	0	26	22	11	7	39	6	26	85	1	1	2		P02787	1		P02787	1
1	Q14624	ITIH4_HUMAN	Inter-alpha-trypsin inhibitor heavy chain H4 OS=Homo sapiens GN=ITIH4 PE=1 SV=4	TBB5_HUMAN	4	101	10	63	1	9	29	43	45	6	8	10	131	1	1	2		Q14624	1		Q14624	1
1	P02760	AMBP_HUMAN	Protein AMBP OS=Homo sapiens GN=AMBP PE=1 SV=1	INADL_HUMAN	20	36	16	30	0	54	51	39	52	7	23	54	172	1	1	2		P02760	1		P02760	1
1	P01857	IGHG1_HUMAN	Ig gamma-1 chain C region OS=Homo sapiens GN=IGHG1 PE=1 SV=1	ZCCHV_HUMAN	5	27	8	31	0	9	34	35	26	72	20	9	187	1	1	2		P01857	1		P01857	1
1	P05154	IPSP_HUMAN	Plasma serine protease inhibitor OS=Homo sapiens GN=SERPINA5 PE=1 SV=3	SDCB1_HUMAN	15	211	19	107	2	22	50	51	115	18	8	24	242	1	1	2		P05154	1		P05154	1
1	Q14508	WFDC2_HUMAN	WAP four-disulfide core domain protein 2 OS=Homo sapiens GN=WFDC2 PE=1 SV=2	SLK_HUMAN	5	3	4	4	0	6	6	4	4	3	10	6	27	1	1	2		Q14508	1		Q14508	1
1	Q9UK41	VPS28_HUMAN	Vacuolar protein sorting-associated protein 28 homolog OS=Homo sapiens GN=VPS28 PE=1 SV=1	EVPL_HUMAN	2	3	2	3	0	4	4	4	3	12	2	4	25	1	1	2		Q9UK41	1		Q9UK41	1
1	Q16270	IBP7_HUMAN	Insulin-like growth factor-binding protein 7 OS=Homo sapiens GN=IGFBP7 PE=1 SV=1	CAN7_HUMAN	9	57	18	52	1	9	23	28	53	8	7	10	119	1	1	2		Q16270	1		Q16270	1
1	P15309	PPAP_HUMAN	Prostatic acid phosphatase OS=Homo sapiens GN=ACPP PE=1 SV=3	BAIP2_HUMAN	3	17	3	13	0	13	5	3	3	8	3	13	22	1	1	2		P15309	1		P15309	1
1	Q6EMK4	VASN_HUMAN	Vasorin OS=Homo sapiens GN=VASN PE=1 SV=1	1433Z_HUMAN	9	30	13	14	2	8	13	13	3	2	6	10	37	1	1	2		Q6EMK4	1		Q6EMK4	1
1	P30041	PRDX6_HUMAN	Peroxiredoxin-6 OS=Homo sapiens GN=PRDX6 PE=1 SV=3	GNA11_HUMAN	5	9	2	2	0	6	2	2	2	8	2	6	16	1	1	2		P30041	1		P30041	1
1	P35527	K1C9_HUMAN	Keratin, type I cytoskeletal 9 OS=Homo sapiens GN=KRT9 PE=1 SV=3	APOD_HUMAN	20	3	2	6	3	9	3	7	6	5	7	12	28	1	1	2		P35527	1		P35527	1
1	P04264	K2C1_HUMAN	Keratin, type II cytoskeletal 1 OS=Homo sapiens GN=KRT1 PE=1 SV=6	GNAI3_HUMAN	38	14	6	6	3	22	4	8	8	8	9	25	37	1	1	2		P04264	1		P04264	1
1	P07339	CATD_HUMAN	Cathepsin D OS=Homo sapiens GN=CTSD PE=1 SV=1	ANXA5_HUMAN	3	31	3	14	1	2	6	15	7	10	6	3	44	1	1	2		P07339	1		P07339	1
1	P41222	PTGDS_HUMAN	Prostaglandin-H2 D-isomerase OS=Homo sapiens GN=PTGDS PE=1 SV=1	SC5A2_HUMAN	4	4	7	7	1	9	11	8	5	4	7	10	35	1	1	2		P41222	1		P41222	1
1	P01859	IGHG2_HUMAN	Ig gamma-2 chain C region OS=Homo sapiens GN=IGHG2 PE=1 SV=2	VATA_HUMAN	3	25	10	24	0	9	27	20	22	34	5	9	108	1	1	2		P01859	1		P01859	1
1	Q96FN5	KIF12_HUMAN	Kinesin-like protein KIF12 OS=Homo sapiens GN=KIF12 PE=2 SV=3	CLUS_HUMAN	0	4	8	13	8	14	17	11	10	6	8	22	52	1	1	2		Q96FN5	1		Q96FN5	1
1	O43895	XPP2_HUMAN	Xaa-Pro aminopeptidase 2 OS=Homo sapiens GN=XPNPEP2 PE=1 SV=3	STOM_HUMAN	7	8	1	7	0	14	18	16	8	32	3	14	77	1	1	2		O43895	1		O43895	1
1	O75351	VPS4B_HUMAN	Vacuolar protein sorting-associated protein 4B OS=Homo sapiens GN=VPS4B PE=1 SV=2	STK24_HUMAN	6	10	0	4	0	10	15	8	9	17	2	10	51	1	1	2		O75351	1		O75351	1
1	P80723	BASP1_HUMAN	Brain acid soluble protein 1 OS=Homo sapiens GN=BASP1 PE=1 SV=2	ES8L1_HUMAN	6	0	10	4	2	18	17	12	10	12	8	20	59	1	1	2		P80723	1		P80723	1
1	P27487	DPP4_HUMAN	Dipeptidyl peptidase 4 OS=Homo sapiens GN=DPP4 PE=1 SV=2	CHM2B_HUMAN	16	11	3	7	2	24	13	11	4	8	1	26	37	1	1	2		P27487	1		P27487	1
1	P19440	GGT1_HUMAN	Gamma-glutamyltranspeptidase 1 OS=Homo sapiens GN=GGT1 PE=1 SV=2	ENOA_HUMAN	12	19	1	6	1	23	16	8	9	31	7	24	71	1	1	2		P19440	1		P19440	1
1	Q8WV92	MITD1_HUMAN	MIT domain-containing protein 1 OS=Homo sapiens GN=MITD1 PE=1 SV=1	HSPB1_HUMAN	4	2	0	3	0	2	6	3	5	4	3	2	21	1	1	2		Q8WV92	1		Q8WV92	1
1	P40121	CAPG_HUMAN	Macrophage-capping protein OS=Homo sapiens GN=CAPG PE=1 SV=2	MYO1C_HUMAN	7	2	6	3	1	5	8	4	4	0	3	6	19	1	1	2		P40121	1		P40121	1
1	P10451	OSTP_HUMAN	Osteopontin OS=Homo sapiens GN=SPP1 PE=1 SV=1	HSP71_HUMAN	10	18	12	58	0	3	25	10	19	0	19	3	73	1	1	2		P10451	1		P10451	1
1	P07998	RNAS1_HUMAN	Ribonuclease pancreatic OS=Homo sapiens GN=RNASE1 PE=1 SV=4	ALDOB_HUMAN	5	2	2	11	4	8	15	13	20	0	16	12	64	1	1	2		P07998	1		P07998	1
1	P22732	GTR5_HUMAN	Solute carrier family 2, facilitated glucose transporter member 5 OS=Homo sapiens GN=SLC2A5 PE=1 SV=1	CDC42_HUMAN	4	5	0	2	1	6	12	8	4	11	2	7	37	1	1	2		P22732	1		P22732	1
1	P63096	GNAI1_HUMAN	Guanine nucleotide-binding protein G(i) subunit alpha-1 OS=Homo sapiens GN=GNAI1 PE=1 SV=2	PACN3_HUMAN	3	5	2	4	0	10	5	6	3	6	0	10	20	1	1	2		P63096	1		P63096	1
1	Q9UQB8	BAIP2_HUMAN	Brain-specific angiogenesis inhibitor 1-associated protein 2 OS=Homo sapiens GN=BAIAP2 PE=1 SV=1	CN37_HUMAN	4	1	3	6	2	11	7	2	8	17	5	13	39	1	1	2		Q9UQB8	1		Q9UQB8	1
1	P63104	1433Z_HUMAN	14-3-3 protein zeta/delta OS=Homo sapiens GN=YWHAZ PE=1 SV=1	CTL2_HUMAN	6	13	1	5	3	14	8	3	4	15	4	17	34	1	1	2		P63104	1		P63104	1
1	P08758	ANXA5_HUMAN	Annexin A5 OS=Homo sapiens GN=ANXA5 PE=1 SV=2	IGHA2_HUMAN	7	8	2	1	0	17	10	3	3	21	3	17	40	1	1	2		P08758	1		P08758	1
1	O00159	MYO1C_HUMAN	Unconventional myosin-Ic OS=Homo sapiens GN=MYO1C PE=1 SV=4	CRIM1_HUMAN	5	0	4	2	0	14	6	6	5	6	6	14	29	1	1	2		O00159	1		O00159	1
1	P05062	ALDOB_HUMAN	Fructose-bisphosphate aldolase B OS=Homo sapiens GN=ALDOB PE=1 SV=2	GBB1_HUMAN	6	37	1	8	3	4	12	9	2	8	3	7	34	1	1	2		P05062	1		P05062	1
1	P09543	CN37_HUMAN	2~,3~-cyclic-nucleotide 3~-phosphodiesterase OS=Homo sapiens GN=CNP PE=1 SV=2	PDE8B_HUMAN	2	3	0	6	0	9	4	4	4	5	2	9	19	1	1	2		P09543	1		P09543	1
1	P01877	IGHA2_HUMAN	Ig alpha-2 chain C region OS=Homo sapiens GN=IGHA2 PE=1 SV=3	CPNE3_HUMAN	2	35	0	20	1	10	29	17	14	34	19	11	113	1	1	2		P01877	1		P01877	1
1	P62873	GBB1_HUMAN	Guanine nucleotide-binding protein G(I)/G(S)/G(T) subunit beta-1 OS=Homo sapiens GN=GNB1 PE=1 SV=3	CA2D1_HUMAN	0	6	2	2	0	4	6	3	3	11	2	4	25	1	1	2		P62873	1		P62873	1
1	P04899	GNAI2_HUMAN	Guanine nucleotide-binding protein G(i) subunit alpha-2 OS=Homo sapiens GN=GNAI2 PE=1 SV=3	NPHN_HUMAN	3	0	2	3	0	8	8	6	7	6	4	8	31	1	1	2		P04899	1		P04899	1
1	P01625	KV402_HUMAN	Ig kappa chain V-IV region Len OS=Homo sapiens PE=1 SV=2	GNAI2_HUMAN	0	4	3	4	6	2	7	8	7	10	5	8	37	1	1	2		P01625	1		P01625	1
1	P01871	IGHM_HUMAN	Ig mu chain C region OS=Homo sapiens GN=IGHM PE=1 SV=3	KV402_HUMAN	9	13	1	5	2	27	2	8	5	28	4	29	47	1	1	2		P01871	1		P01871	1
1	Q12913	PTPRJ_HUMAN	Receptor-type tyrosine-protein phosphatase eta OS=Homo sapiens GN=PTPRJ PE=1 SV=3	BI2L1_HUMAN	6	0	5	8	1	9	5	2	2	7	6	10	22	1	1	2		Q12913	1		Q12913	1
1	P01591	IGJ_HUMAN	Immunoglobulin J chain OS=Homo sapiens GN=IGJ PE=1 SV=4	CHM1B_HUMAN	0	14	6	12	1	6	15	20	19	8	12	7	74	1	1	2		P01591	1		P01591	1
1	Q8N271	PROM2_HUMAN	Prominin-2 OS=Homo sapiens GN=PROM2 PE=1 SV=1	KIF3B_HUMAN	8	4	0	4	0	8	2	2	3	6	3	8	16	1	1	2		Q8N271	1		Q8N271	1
1	O75955	FLOT1_HUMAN	Flotillin-1 OS=Homo sapiens GN=FLOT1 PE=1 SV=3	S12A1_HUMAN	5	0	2	3	5	6	5	4	4	8	4	11	25	1	1	2		O75955	1		O75955	1
1	O43451	MGA_HUMAN	Maltase-glucoamylase, intestinal OS=Homo sapiens GN=MGAM PE=1 SV=5	PODXL_HUMAN	0	7	3	6	1	3	10	11	2	24	5	4	52	1	1	2		O43451	1		O43451	1
1	O15393	TMPS2_HUMAN	Transmembrane protease serine 2 OS=Homo sapiens GN=TMPRSS2 PE=1 SV=3	IGHM_HUMAN	4	1	3	3	9	14	3	2	5	4	2	23	16	1	1	2		O15393	1		O15393	1
1	O00526	UPK2_HUMAN	Uroplakin-2 OS=Homo sapiens GN=UPK2 PE=2 SV=2	CYBR1_HUMAN	3	1	8	2	2	10	7	5	4	2	6	12	24	1	1	2		O00526	1		O00526	1
1	P51148	RAB5C_HUMAN	Ras-related protein Rab-5C OS=Homo sapiens GN=RAB5C PE=1 SV=2	TS101_HUMAN	3	2	1	2	0	4	2	2	2	7	2	4	15	1	1	2		P51148	1		P51148	1
1	P20073	ANXA7_HUMAN	Annexin A7 OS=Homo sapiens GN=ANXA7 PE=1 SV=3	DPYS_HUMAN	2	2	3	3	0	9	1	2	4	16	3	9	26	1	1	2		P20073	1		P20073	1
1	P98160	PGBM_HUMAN	Basement membrane-specific heparan sulfate proteoglycan core protein OS=Homo sapiens GN=HSPG2 PE=1 SV=4	LAC2_HUMAN	3	37	8	26	0	5	9	26	19	0	18	5	72	1	1	2		P98160	1		P98160	1
1	P55017	S12A3_HUMAN	Solute carrier family 12 member 3 OS=Homo sapiens GN=SLC12A3 PE=1 SV=3	MYH9_HUMAN	6	1	8	2	0	3	3	2	4	20	3	3	32	1	1	2		P55017	1		P55017	1
1	Q03403	TFF2_HUMAN	Trefoil factor 2 OS=Homo sapiens GN=TFF2 PE=1 SV=2	PLCD1_HUMAN	3	1	4	4	2	3	5	3	5	3	5	5	21	1	1	2		Q03403	1		Q03403	1
1	P12109	CO6A1_HUMAN	Collagen alpha-1(VI) chain OS=Homo sapiens GN=COL6A1 PE=1 SV=3	SARG_HUMAN	4	58	5	27	0	2	13	9	11	0	4	2	37	1	1	2		P12109	1		P12109	1
1	P10253	LYAG_HUMAN	Lysosomal alpha-glucosidase OS=Homo sapiens GN=GAA PE=1 SV=4	EHD1_HUMAN	3	24	2	14	0	5	9	4	0	5	8	5	26	1	1	2		P10253	1		P10253	1
1	P01860	IGHG3_HUMAN	Ig gamma-3 chain C region OS=Homo sapiens GN=IGHG3 PE=1 SV=2	NHRF1_HUMAN	0	12	11	20	1	5	12	26	14	31	6	6	89	1	1	2		P01860	1		P01860	1
1	P04746	AMYP_HUMAN	Pancreatic alpha-amylase OS=Homo sapiens GN=AMY2A PE=1 SV=2	PARK7_HUMAN	4	22	11	29	0	12	14	32	16	1	8	12	71	1	1	2		P04746	1		P04746	1
1	P61586	RHOA_HUMAN	Transforming protein RhoA OS=Homo sapiens GN=RHOA PE=1 SV=1	BCAM_HUMAN	2	3	2	0	3	5	4	3	2	9	2	8	20	1	1	2		P61586	1		P61586	1
1	P05023	AT1A1_HUMAN	Sodium/potassium-transporting ATPase subunit alpha-1 OS=Homo sapiens GN=ATP1A1 PE=1 SV=1	CHMP6_HUMAN	6	2	8	0	5	4	25	10	14	20	6	9	75	1	1	2		P05023	1		P05023	1
1	P01765	HV304_HUMAN	Ig heavy chain V-III region TIL OS=Homo sapiens PE=1 SV=1	PTPRJ_HUMAN	0	4	3	3	0	5	4	3	5	12	3	5	27	1	1	2		P01765	1		P01765	1
1	P07737	PROF1_HUMAN	Profilin-1 OS=Homo sapiens GN=PFN1 PE=1 SV=2	IGJ_HUMAN	2	2	4	2	5	7	4	2	1	3	3	12	13	1	1	2		P07737	1		P07737	1
1	P00338	LDHA_HUMAN	L-lactate dehydrogenase A chain OS=Homo sapiens GN=LDHA PE=1 SV=2	PROM2_HUMAN	5	18	3	5	1	5	4	5	5	13	0	6	27	1	1	2		P00338	1		P00338	1
1	P33908	MA1A1_HUMAN	Mannosyl-oligosaccharide 1,2-alpha-mannosidase IA OS=Homo sapiens GN=MAN1A1 PE=1 SV=3	GBG12_HUMAN	2	33	6	15	2	4	4	4	9	8	1	6	26	1	1	2		P33908	1		P33908	1
1	O15162	PLS1_HUMAN	Phospholipid scramblase 1 OS=Homo sapiens GN=PLSCR1 PE=1 SV=1	NAPSA_HUMAN	2	2	3	1	4	4	2	2	3	2	2	8	11	1	1	2		O15162	1		O15162	1
1	P06396	GELS_HUMAN	Gelsolin OS=Homo sapiens GN=GSN PE=1 SV=1	CLIC6_HUMAN	0	23	2	11	0	10	4	11	11	9	2	10	37	1	1	2		P06396	1		P06396	1
1	Q12805	FBLN3_HUMAN	EGF-containing fibulin-like extracellular matrix protein 1 OS=Homo sapiens GN=EFEMP1 PE=1 SV=2	SYUG_HUMAN	5	27	8	20	0	1	10	20	8	2	9	1	49	1	1	2		Q12805	1		Q12805	1
1	P35908	K22E_HUMAN	Keratin, type II cytoskeletal 2 epidermal OS=Homo sapiens GN=KRT2 PE=1 SV=2	ANXA6_HUMAN	13	5	1	4	1	7	2	3	8	5	3	8	21	1	1	2		P35908	1		P35908	1
1	P01011	AACT_HUMAN	Alpha-1-antichymotrypsin OS=Homo sapiens GN=SERPINA3 PE=1 SV=2	DAF_HUMAN	3	27	2	5	0	5	1	6	6	2	2	5	17	1	1	2		P01011	1		P01011	1
1	O43653	PSCA_HUMAN	Prostate stem cell antigen OS=Homo sapiens GN=PSCA PE=1 SV=1	ACE_HUMAN	4	3	1	4	3	8	5	4	3	3	4	11	19	1	1	2		O43653	1		O43653	1
1	Q96EY5	MB12A_HUMAN	Multivesicular body subunit 12A OS=Homo sapiens GN=MVB12A PE=1 SV=1	TMC5_HUMAN	2	4	1	3	0	1	11	2	5	3	4	1	25	1	1	2		Q96EY5	1		Q96EY5	1
1	Q9H6S3	ES8L2_HUMAN	Epidermal growth factor receptor kinase substrate 8-like protein 2 OS=Homo sapiens GN=EPS8L2 PE=1 SV=2	AT12A_HUMAN	2	1	2	6	0	7	7	2	4	12	1	7	26	1	1	2		Q9H6S3	1		Q9H6S3	1
1	P15328	FOLR1_HUMAN	Folate receptor alpha OS=Homo sapiens GN=FOLR1 PE=1 SV=3	SPAST_HUMAN	2	11	7	11	0	1	9	8	11	3	0	1	31	1	1	2		P15328	1		P15328	1
1	P08754	GNAI3_HUMAN	Guanine nucleotide-binding protein G(k) subunit alpha OS=Homo sapiens GN=GNAI3 PE=1 SV=3	FLOT1_HUMAN	5	0	0	2	4	9	2	2	3	5	2	13	14	1	1	2		P08754	1		P08754	1
1	P08107	HSP71_HUMAN	Heat shock 70 kDa protein 1A/1B OS=Homo sapiens GN=HSPA1A PE=1 SV=5	MGA_HUMAN	7	12	0	5	2	22	7	6	9	22	0	24	44	1	1	2		P08107	1		P08107	1
1	P35579	MYH9_HUMAN	Myosin-9 OS=Homo sapiens GN=MYH9 PE=1 SV=4	FRK_HUMAN	0	2	2	2	0	10	4	6	5	10	0	10	25	1	1	2		P35579	1		P35579	1
1	P51178	PLCD1_HUMAN	1-phosphatidylinositol 4,5-bisphosphate phosphodiesterase delta-1 OS=Homo sapiens GN=PLCD1 PE=1 SV=2	RAB5A_HUMAN	0	0	4	2	0	4	2	2	3	2	6	4	15	1	1	2		P51178	1		P51178	1
1	O14745	NHRF1_HUMAN	Na(+)/H(+) exchange regulatory cofactor NHE-RF1 OS=Homo sapiens GN=SLC9A3R1 PE=1 SV=4	CPN2_HUMAN	3	1	0	3	1	4	6	7	5	19	2	5	39	1	1	2		O14745	1		O14745	1
1	Q9UBI6	GBG12_HUMAN	Guanine nucleotide-binding protein G(I)/G(S)/G(O) subunit gamma-12 OS=Homo sapiens GN=GNG12 PE=1 SV=3	PKHD1_HUMAN	0	4	2	1	0	7	3	2	4	8	2	7	19	1	1	2		Q9UBI6	1		Q9UBI6	1
1	P12821	ACE_HUMAN	Angiotensin-converting enzyme OS=Homo sapiens GN=ACE PE=1 SV=1	OCC1_HUMAN	2	9	0	2	0	12	6	3	1	24	3	12	37	1	1	2		P12821	1		P12821	1
1	P04083	ANXA1_HUMAN	Annexin A1 OS=Homo sapiens GN=ANXA1 PE=1 SV=2	THRB_HUMAN	2	25	1	2	2	10	7	12	2	8	1	12	30	1	1	2		P04083	1		P04083	1
1	Q15286	RAB35_HUMAN	Ras-related protein Rab-35 OS=Homo sapiens GN=RAB35 PE=1 SV=1	VP37B_HUMAN	4	0	3	4	0	5	7	2	1	4	2	5	16	1	1	2		Q15286	1		Q15286	1
1	Q495M3	S36A2_HUMAN	Proton-coupled amino acid transporter 2 OS=Homo sapiens GN=SLC36A2 PE=1 SV=1	ANXA1_HUMAN	3	5	1	0	2	8	6	5	6	7	3	10	27	1	1	2		Q495M3	1		Q495M3	1
1	O00161	SNP23_HUMAN	Synaptosomal-associated protein 23 OS=Homo sapiens GN=SNAP23 PE=1 SV=1	AQP2_HUMAN	3	0	2	2	0	10	3	0	2	5	2	10	12	1	1	2		O00161	1		O00161	1
1	O00322	UPK1A_HUMAN	Uroplakin-1a OS=Homo sapiens GN=UPK1A PE=2 SV=1	SYTL2_HUMAN	3	0	4	1	0	8	7	4	5	2	2	8	20	1	1	2		O00322	1		O00322	1
1	O75882	ATRN_HUMAN	Attractin OS=Homo sapiens GN=ATRN PE=1 SV=2	TBA1C_HUMAN	1	1	6	12	0	5	4	3	2	2	4	5	15	1	1	2		O75882	1		O75882	1
1	Q96KP4	CNDP2_HUMAN	Cytosolic non-specific dipeptidase OS=Homo sapiens GN=CNDP2 PE=1 SV=2	RAB35_HUMAN	1	22	5	5	0	11	3	3	4	15	0	11	25	1	1	2		Q96KP4	1		Q96KP4	1
1	P08195	4F2_HUMAN	4F2 cell-surface antigen heavy chain OS=Homo sapiens GN=SLC3A2 PE=1 SV=3	TMPS2_HUMAN	1	14	0	3	1	5	6	4	3	7	2	6	22	1	1	2		P08195	1		P08195	1
1	P04004	VTNC_HUMAN	Vitronectin OS=Homo sapiens GN=VTN PE=1 SV=1	BCAS1_HUMAN	0	29	0	11	0	6	18	18	21	11	2	6	70	1	1	2		P04004	1		P04004	1
1	P06870	KLK1_HUMAN	Kallikrein-1 OS=Homo sapiens GN=KLK1 PE=1 SV=2	TRFM_HUMAN	3	16	3	5	0	1	4	4	8	0	7	1	23	1	1	2		P06870	1		P06870	1
1	O75874	IDHC_HUMAN	Isocitrate dehydrogenase [NADP] cytoplasmic OS=Homo sapiens GN=IDH1 PE=1 SV=2	TBA1A_HUMAN	11	12	1	5	0	25	4	3	1	8	3	25	19	1	1	2		O75874	1		O75874	1
1	P00751	CFAB_HUMAN	Complement factor B OS=Homo sapiens GN=CFB PE=1 SV=2	S36A2_HUMAN	0	17	3	8	0	12	3	7	2	6	0	12	18	1	1	2		P00751	1		P00751	1
1	P00918	CAH2_HUMAN	Carbonic anhydrase 2 OS=Homo sapiens GN=CA2 PE=1 SV=2	CYS1_HUMAN	3	9	0	3	0	3	3	4	4	4	1	3	16	1	1	2		P00918	1		P00918	1
1	P19801	AOC1_HUMAN	Amiloride-sensitive amine oxidase [copper-containing] OS=Homo sapiens GN=AOC1 PE=1 SV=4	UPK2_HUMAN	1	20	3	11	3	2	8	3	6	2	0	5	19	1	1	2		P19801	1		P19801	1
1	P61026	RAB10_HUMAN	Ras-related protein Rab-10 OS=Homo sapiens GN=RAB10 PE=1 SV=1	HV305_HUMAN	5	4	2	1	4	6	2	2	1	5	2	10	12	1	1	2		P61026	1		P61026	1
1	P00966	ASSY_HUMAN	Argininosuccinate synthase OS=Homo sapiens GN=ASS1 PE=1 SV=2	VPP4_HUMAN	2	13	1	3	1	7	4	2	5	17	1	8	29	1	1	2		P00966	1		P00966	1
1	P10153	RNAS2_HUMAN	Non-secretory ribonuclease OS=Homo sapiens GN=RNASE2 PE=1 SV=2	CSPP1_HUMAN	0	5	1	14	0	6	16	8	6	2	12	6	44	1	1	2		P10153	1		P10153	1
1	P68104	EF1A1_HUMAN	Elongation factor 1-alpha 1 OS=Homo sapiens GN=EEF1A1 PE=1 SV=1	ANXA2_HUMAN	1	10	2	2	8	7	6	3	0	13	3	15	25	1	1	2		P68104	1		P68104	1
1	Q96A22	CK052_HUMAN	Uncharacterized protein C11orf52 OS=Homo sapiens GN=C11orf52 PE=2 SV=2	C42S2_HUMAN	2	1	3	3	0	2	4	3	0	5	2	2	14	1	1	2		Q96A22	1		Q96A22	1
1	P10643	CO7_HUMAN	Complement component C7 OS=Homo sapiens GN=C7 PE=1 SV=2	CD2AP_HUMAN	0	4	2	5	2	1	3	7	10	17	10	3	47	1	1	2		P10643	1		P10643	1
1	Q96FE7	P3IP1_HUMAN	Phosphoinositide-3-kinase-interacting protein 1 OS=Homo sapiens GN=PIK3IP1 PE=1 SV=2	1433B_HUMAN	4	1	4	3	0	6	4	2	4	1	4	6	15	1	1	2		Q96FE7	1		Q96FE7	1
1	P02649	APOE_HUMAN	Apolipoprotein E OS=Homo sapiens GN=APOE PE=1 SV=1	PGK1_HUMAN	7	22	2	6	5	11	1	2	5	10	0	16	18	1	1	2		P02649	1		P02649	1
1	P05155	IC1_HUMAN	Plasma protease C1 inhibitor OS=Homo sapiens GN=SERPING1 PE=1 SV=2	PEBP1_HUMAN	5	35	3	2	0	3	2	2	1	14	1	3	20	1	1	2		P05155	1		P05155	1
1	Q9NZP8	C1RL_HUMAN	Complement C1r subcomponent-like protein OS=Homo sapiens GN=C1RL PE=1 SV=2	RAP1A_HUMAN	1	7	7	10	0	2	10	7	3	0	4	2	24	1	1	2		Q9NZP8	1		Q9NZP8	1
1	P01617	KV204_HUMAN	Ig kappa chain V-II region TEW OS=Homo sapiens PE=1 SV=1	MRP_HUMAN	0	5	2	4	0	0	5	6	2	4	6	0	23	1	1	2		P01617	1		P01617	1
1	P01024	CO3_HUMAN	Complement C3 OS=Homo sapiens GN=C3 PE=1 SV=2	GAPR1_HUMAN	1	66	11	31	0	11	11	50	45	46	1	11	153	1	1	2		P01024	1		P01024	1
1	P13645	K1C10_HUMAN	Keratin, type I cytoskeletal 10 OS=Homo sapiens GN=KRT10 PE=1 SV=6	A2MG_HUMAN	16	5	3	0	3	11	1	3	5	4	3	14	16	1	1	2		P13645	1		P13645	1
1	O00468	AGRIN_HUMAN	Agrin OS=Homo sapiens GN=AGRN PE=1 SV=5	MDHC_HUMAN	0	21	2	26	0	2	22	27	39	0	4	2	92	1	1	2		O00468	1		O00468	1
1	P07996	TSP1_HUMAN	Thrombospondin-1 OS=Homo sapiens GN=THBS1 PE=1 SV=2	CTL4_HUMAN	2	33	1	12	0	1	5	7	6	2	3	1	23	1	1	2		P07996	1		P07996	1
1	P00450	CERU_HUMAN	Ceruloplasmin OS=Homo sapiens GN=CP PE=1 SV=1	SNP23_HUMAN	0	41	4	13	0	4	41	28	12	23	1	4	105	1	1	2		P00450	1		P00450	1
1	P00747	PLMN_HUMAN	Plasminogen OS=Homo sapiens GN=PLG PE=1 SV=2	TRFE_HUMAN	0	22	4	7	6	3	12	15	32	9	0	9	68	1	1	2		P00747	1		P00747	1
1	Q07075	AMPE_HUMAN	Glutamyl aminopeptidase OS=Homo sapiens GN=ENPEP PE=1 SV=3	UPK1A_HUMAN	4	3	0	2	3	3	2	0	2	12	5	6	21	1	1	2		Q07075	1		Q07075	1
1	Q92896	GSLG1_HUMAN	Golgi apparatus protein 1 OS=Homo sapiens GN=GLG1 PE=1 SV=2	EHD4_HUMAN	0	27	3	16	0	0	9	8	18	9	2	0	46	1	1	2		Q92896	1		Q92896	1
1	Q9BXP8	PAPP2_HUMAN	Pappalysin-2 OS=Homo sapiens GN=PAPPA2 PE=1 SV=4	ATRN_HUMAN	0	16	2	18	6	0	5	14	4	2	2	6	27	1	1	2		Q9BXP8	1		Q9BXP8	1
1	P05543	THBG_HUMAN	Thyroxine-binding globulin OS=Homo sapiens GN=SERPINA7 PE=1 SV=2	RAP1B_HUMAN	2	10	4	6	0	3	7	4	2	0	0	3	13	1	1	2		P05543	1		P05543	1
1	Q9H3G5	CPVL_HUMAN	Probable serine carboxypeptidase CPVL OS=Homo sapiens GN=CPVL PE=1 SV=2	CNDP2_HUMAN	1	23	0	5	0	3	2	4	8	11	2	3	27	1	1	2		Q9H3G5	1		Q9H3G5	1
1	P68371	TBB4B_HUMAN	Tubulin beta-4B chain OS=Homo sapiens GN=TUBB4B PE=1 SV=1	PTN13_HUMAN	0	5	9	0	0	11	5	5	3	8	0	11	21	1	1	2		P68371	1		P68371	1									Q9H4M9
1	P62879	GBB2_HUMAN	Guanine nucleotide-binding protein G(I)/G(S)/G(T) subunit beta-2 OS=Homo sapiens GN=GNB2 PE=1 SV=3	GRN_HUMAN	5	7	0	0	0	7	5	3	3	16	0	7	27	1	1	2		P62879	1		P62879	1									P08174
1	P31639	SC5A2_HUMAN	Sodium/glucose cotransporter 2 OS=Homo sapiens GN=SLC5A2 PE=1 SV=1	KCY_HUMAN	1	2	1	1	0	4	4	7	6	2	5	4	24	1	1	2		P31639	1		P31639	1
1	P38606	VATA_HUMAN	V-type proton ATPase catalytic subunit A OS=Homo sapiens GN=ATP6V1A PE=1 SV=2	CCM2_HUMAN	2	1	1	2	0	9	2	1	5	11	5	9	24	1	1	2		P38606	1		P38606	1
1	Q8TE68	ES8L1_HUMAN	Epidermal growth factor receptor kinase substrate 8-like protein 1 OS=Homo sapiens GN=EPS8L1 PE=1 SV=3	CAN5_HUMAN	1	0	4	1	0	4	4	2	4	2	2	4	14	1	1	2		Q8TE68	1		Q8TE68	1
1	P04792	HSPB1_HUMAN	Heat shock protein beta-1 OS=Homo sapiens GN=HSPB1 PE=1 SV=2	RAB5C_HUMAN	1	1	4	5	1	4	5	6	4	7	1	5	23	1	1	2		P04792	1		P04792	1
1	O75131	CPNE3_HUMAN	Copine-3 OS=Homo sapiens GN=CPNE3 PE=1 SV=1	LFG3_HUMAN	0	0	0	2	0	5	3	3	7	16	7	5	36	1	1	2		O75131	1		O75131	1
1	Q9BW04	SARG_HUMAN	Specifically androgen-regulated gene protein OS=Homo sapiens GN=SARG PE=1 SV=2	ITBP1_HUMAN	2	0	4	2	0	5	8	1	2	0	4	5	15	1	1	2		Q9BW04	1		Q9BW04	1
1	Q9H4M9	EHD1_HUMAN	EH domain-containing protein 1 OS=Homo sapiens GN=EHD1 PE=1 SV=2	PKD2_HUMAN	3	1	1	2	0	10	5	2	4	16	0	10	27	1	1	2		Q9H4M9	1			1
1	P08174	DAF_HUMAN	Complement decay-accelerating factor OS=Homo sapiens GN=CD55 PE=1 SV=4	ANXA7_HUMAN	0	1	5	2	1	13	8	2	5	1	5	14	21	1	1	2		P08174	1			1
1	P08582	TRFM_HUMAN	Melanotransferrin OS=Homo sapiens GN=MFI2 PE=1 SV=2	GNAS2_HUMAN	5	2	4	13	5	4	3	1	4	0	0	9	8	1	1	2		P08582	1		P08582	1
1	Q9Y5K6	CD2AP_HUMAN	CD2-associated protein OS=Homo sapiens GN=CD2AP PE=1 SV=1	NHRF3_HUMAN	0	0	4	0	0	3	3	4	4	8	4	3	23	1	1	2		Q9Y5K6	1		Q9Y5K6	1
1	P31946	1433B_HUMAN	14-3-3 protein beta/alpha OS=Homo sapiens GN=YWHAB PE=1 SV=3	S47A1_HUMAN	6	9	2	6	0	16	6	1	0	15	0	16	22	1	1	2		P31946	1		P31946	1
1	P28799	GRN_HUMAN	Granulins OS=Homo sapiens GN=GRN PE=1 SV=2	CHMP3_HUMAN	2	1	2	2	0	0	6	5	3	1	4	0	19	1	1	2		P28799	1		P28799	1
1	Q5T2W1	NHRF3_HUMAN	Na(+)/H(+) exchange regulatory cofactor NHE-RF3 OS=Homo sapiens GN=PDZK1 PE=1 SV=2	VP37C_HUMAN	0	0	0	3	0	2	13	9	9	19	2	2	52	1	1	2		Q5T2W1	1		Q5T2W1	1
1	O75264	SIM24_HUMAN	Small integral membrane protein 24 OS=Homo sapiens GN=SMIM24 PE=2 SV=2	COF1_HUMAN	4	5	0	1	1	3	4	8	2	9	0	4	23	1	1	2		O75264	1		O75264	1
1	#N/A	DHAK_HUMAN	Bifunctional ATP-dependent dihydroxyacetone kinase/FAD-AMP lyase (cyclizing) OS=Homo sapiens GN=DAK PE=1 SV=2	SC5AC_HUMAN	0	17	0	3	0	4	4	2	2	7	0	4	15	1	1	2		#N/A	1		#N/A	1
1	P04406	G3P_HUMAN	Glyceraldehyde-3-phosphate dehydrogenase OS=Homo sapiens GN=GAPDH PE=1 SV=3	GGT6_HUMAN	4	31	0	5	2	5	4	1	3	10	0	7	18	1	1	2		P04406	1		P04406	1
1	P13987	CD59_HUMAN	CD59 glycoprotein OS=Homo sapiens GN=CD59 PE=1 SV=1	ANCHR_HUMAN	5	3	1	1	0	7	4	1	3	8	3	7	19	1	1	2		P13987	1		P13987	1
1	P51149	RAB7A_HUMAN	Ras-related protein Rab-7a OS=Homo sapiens GN=RAB7A PE=1 SV=1	PGBM_HUMAN	2	0	0	1	4	10	2	2	3	9	4	14	20	1	1	2		P51149	1		P51149	1
1	P29966	MARCS_HUMAN	Myristoylated alanine-rich C-kinase substrate OS=Homo sapiens GN=MARCKS PE=1 SV=4	SODC_HUMAN	2	0	4	1	0	7	4	2	1	3	3	7	13	1	1	2		P29966	1		P29966	1
1	P42785	PCP_HUMAN	Lysosomal Pro-X carboxypeptidase OS=Homo sapiens GN=PRCP PE=1 SV=1	CBR1_HUMAN	0	4	3	2	0	1	3	0	8	3	7	1	21	1	1	2		P42785	1		P42785	1
1	P22891	PROZ_HUMAN	Vitamin K-dependent protein Z OS=Homo sapiens GN=PROZ PE=1 SV=2	RRAS2_HUMAN	1	23	4	10	2	3	2	3	8	1	1	5	15	1	1	2		P22891	1		P22891	1
1	Q9Y287	ITM2B_HUMAN	Integral membrane protein 2B OS=Homo sapiens GN=ITM2B PE=1 SV=1	SIM24_HUMAN	1	4	0	3	0	1	3	2	4	2	3	1	14	1	1	2		Q9Y287	1		Q9Y287	1
1	O00299	CLIC1_HUMAN	Chloride intracellular channel protein 1 OS=Homo sapiens GN=CLIC1 PE=1 SV=4	ITIH4_HUMAN	2	4	0	1	6	8	3	0	3	5	2	14	13	1	1	2		O00299	1		O00299	1
1	Q9UHL4	DPP2_HUMAN	Dipeptidyl peptidase 2 OS=Homo sapiens GN=DPP7 PE=1 SV=3	SNX9_HUMAN	1	6	2	3	0	0	6	4	2	0	3	0	15	1	1	2		Q9UHL4	1		Q9UHL4	1
1	P16278	BGAL_HUMAN	Beta-galactosidase OS=Homo sapiens GN=GLB1 PE=1 SV=2	MIF_HUMAN	1	6	0	1	0	8	4	2	3	21	2	8	32	1	1	2		P16278	1		P16278	1
1	Q13510	ASAH1_HUMAN	Acid ceramidase OS=Homo sapiens GN=ASAH1 PE=1 SV=5	CHM1A_HUMAN	1	12	2	5	0	0	4	9	4	8	1	0	26	1	1	2		Q13510	1		Q13510	1
1	O95865	DDAH2_HUMAN	N(G),N(G)-dimethylarginine dimethylaminohydrolase 2 OS=Homo sapiens GN=DDAH2 PE=1 SV=1	1433T_HUMAN	2	11	2	6	0	5	1	6	5	0	0	5	12	1	1	2		O95865	1		O95865	1
1	P49189	AL9A1_HUMAN	4-trimethylaminobutyraldehyde dehydrogenase OS=Homo sapiens GN=ALDH9A1 PE=1 SV=3	RASN_HUMAN	0	11	4	3	0	5	2	2	1	2	0	5	7	1	1	2		P49189	1		P49189	1
1	Q6UVK1	CSPG4_HUMAN	Chondroitin sulfate proteoglycan 4 OS=Homo sapiens GN=CSPG4 PE=1 SV=2	GGACT_HUMAN	1	7	3	6	0	0	5	3	4	0	2	0	14	1	1	2		Q6UVK1	1		Q6UVK1	1
1	P08294	SODE_HUMAN	Extracellular superoxide dismutase [Cu-Zn] OS=Homo sapiens GN=SOD3 PE=1 SV=2	AMBP_HUMAN	0	13	4	8	14	1	13	9	10	0	4	15	36	1	1	2		P08294	1		P08294	1
1	P50395	GDIB_HUMAN	Rab GDP dissociation inhibitor beta OS=Homo sapiens GN=GDI2 PE=1 SV=2	DCXR_HUMAN	0	17	2	1	0	14	4	3	3	11	1	14	22	1	1	2		P50395	1		P50395	1
1	P01009	A1AT_HUMAN	Alpha-1-antitrypsin OS=Homo sapiens GN=SERPINA1 PE=1 SV=3	STX3_HUMAN	0	93	1	23	0	8	8	2	6	156	0	8	172	1	1	2		P01009	1		P01009	1
1	P05156	CFAI_HUMAN	Complement factor I OS=Homo sapiens GN=CFI PE=1 SV=2	IGHG1_HUMAN	0	19	14	27	5	0	11	17	21	1	4	5	54	1	1	2		P05156	1		P05156	1
1	P02751	FINC_HUMAN	Fibronectin OS=Homo sapiens GN=FN1 PE=1 SV=4	ANXA3_HUMAN	0	29	1	13	0	3	7	9	15	1	4	3	36	1	1	2		P02751	1		P02751	1
1	Q03591	FHR1_HUMAN	Complement factor H-related protein 1 OS=Homo sapiens GN=CFHR1 PE=1 SV=2	AR13B_HUMAN	0	6	2	9	3	3	5	8	8	0	0	6	21	1	1	2		Q03591	1		Q03591	1
1	Q8WZ75	ROBO4_HUMAN	Roundabout homolog 4 OS=Homo sapiens GN=ROBO4 PE=1 SV=1	IPSP_HUMAN	0	7	4	9	6	0	4	13	7	0	5	6	29	1	1	2		Q8WZ75	1		Q8WZ75	1
1	P17174	AATC_HUMAN	Aspartate aminotransferase, cytoplasmic OS=Homo sapiens GN=GOT1 PE=1 SV=3	STK11_HUMAN	0	17	2	5	0	0	2	2	0	3	2	0	9	1	1	2		P17174	1		P17174	1
1	P00749	UROK_HUMAN	Urokinase-type plasminogen activator OS=Homo sapiens GN=PLAU PE=1 SV=2	KI21A_HUMAN	1	44	3	5	0	1	6	8	17	3	0	1	34	1	1	2		P00749	1		P00749	1
1	P02765	FETUA_HUMAN	Alpha-2-HS-glycoprotein OS=Homo sapiens GN=AHSG PE=1 SV=1	WFDC2_HUMAN	0	10	3	3	0	5	3	4	4	0	0	5	11	1	1	2		P02765	1		P02765	1
1	O00391	QSOX1_HUMAN	Sulfhydryl oxidase 1 OS=Homo sapiens GN=QSOX1 PE=1 SV=3	MT1E_HUMAN	1	23	2	9	0	0	5	7	16	0	5	0	33	1	1	2		O00391	1		O00391	1
1	Q13332	PTPRS_HUMAN	Receptor-type tyrosine-protein phosphatase S OS=Homo sapiens GN=PTPRS PE=1 SV=3	LMBD1_HUMAN	0	10	5	10	0	0	3	2	7	0	2	0	14	1	1	2		Q13332	1		Q13332	1
1	O95336	6PGL_HUMAN	6-phosphogluconolactonase OS=Homo sapiens GN=PGLS PE=1 SV=2	S12A3_HUMAN	4	14	1	3	1	5	4	6	3	0	0	6	13	1	1	2		O95336	1		O95336	1
1	Q9BRK3	MXRA8_HUMAN	Matrix-remodeling-associated protein 8 OS=Homo sapiens GN=MXRA8 PE=2 SV=1	S13A3_HUMAN	0	20	2	8	0	2	3	2	9	0	0	2	14	1	1	2		Q9BRK3	1		Q9BRK3	1
1	P01034	CYTC_HUMAN	Cystatin-C OS=Homo sapiens GN=CST3 PE=1 SV=1	RB11A_HUMAN	5	14	1	14	1	1	8	7	4	1	5	2	25	1	1	2		P01034	1		P01034	1
1	Q16769	QPCT_HUMAN	Glutaminyl-peptide cyclotransferase OS=Homo sapiens GN=QPCT PE=1 SV=1	SUSD2_HUMAN	0	2	4	4	0	0	2	3	7	0	4	0	16	1	1	2		Q16769	1		Q16769	1
1	Q13885	TBB2A_HUMAN	Tubulin beta-2A chain OS=Homo sapiens GN=TUBB2A PE=1 SV=1	VPS28_HUMAN	2	0	0	4	6	0	4	2	3	8	3	6	20	1	1	2		Q13885	1		Q13885	1
1	P04217	A1BG_HUMAN	Alpha-1B-glycoprotein OS=Homo sapiens GN=A1BG PE=1 SV=4	MPP5_HUMAN	0	4	1	6	0	2	39	8	13	4	0	2	64	1	1	2		P04217	1		P04217	1
1	P02788	TRFL_HUMAN	Lactotransferrin OS=Homo sapiens GN=LTF PE=1 SV=6	AAPK1_HUMAN	0	8	0	0	0	68	8	35	15	28	4	68	90	1	1	2		P02788	1		P02788	1
1	P02790	HEMO_HUMAN	Hemopexin OS=Homo sapiens GN=HPX PE=1 SV=2	TFF2_HUMAN	0	24	0	4	6	2	4	2	4	18	0	8	28	1	1	2		P02790	1		P02790	1
1	Q99835	SMO_HUMAN	Smoothened homolog OS=Homo sapiens GN=SMO PE=1 SV=1	STK10_HUMAN	3	0	2	4	0	1	4	2	6	0	0	1	12	1	1	2		Q99835	1		Q99835	1
1	Q96CF2	CHM4C_HUMAN	Charged multivesicular body protein 4c OS=Homo sapiens GN=CHMP4C PE=1 SV=1	MUC6_HUMAN	0	0	0	3	0	0	5	2	5	2	3	0	17	1	1	2		Q96CF2	1		Q96CF2	1
1	Q53TN4	CYBR1_HUMAN	Cytochrome b reductase 1 OS=Homo sapiens GN=CYBRD1 PE=1 SV=1	ACY1_HUMAN	2	1	1	2	1	0	3	2	2	0	3	1	10	1	1	2		Q53TN4	1		Q53TN4	1
1	Q99497	PARK7_HUMAN	Protein DJ-1 OS=Homo sapiens GN=PARK7 PE=1 SV=2	RASK_HUMAN	2	2	2	0	0	7	1	3	0	2	1	7	7	1	1	2		Q99497	1		Q99497	1
1	Q96FZ7	CHMP6_HUMAN	Charged multivesicular body protein 6 OS=Homo sapiens GN=CHMP6 PE=1 SV=3	STX7_HUMAN	1	0	2	3	0	5	4	2	2	0	1	5	9	1	1	2		Q96FZ7	1		Q96FZ7	1
1	P42685	FRK_HUMAN	Tyrosine-protein kinase FRK OS=Homo sapiens GN=FRK PE=1 SV=1	KCNJ1_HUMAN	1	0	1	0	0	3	3	2	3	3	2	3	13	1	1	2		P42685	1		P42685	1
1	P22792	CPN2_HUMAN	Carboxypeptidase N subunit 2 OS=Homo sapiens GN=CPN2 PE=1 SV=3	RASH_HUMAN	1	20	1	16	0	1	4	3	3	1	3	1	14	1	1	2		P22792	1		P22792	1
1	P41181	AQP2_HUMAN	Aquaporin-2 OS=Homo sapiens GN=AQP2 PE=1 SV=1	DHAK_HUMAN	0	2	2	1	0	2	2	1	5	3	1	2	12	1	1	2		P41181	1		P41181	1
1	Q71U36	TBA1A_HUMAN	Tubulin alpha-1A chain OS=Homo sapiens GN=TUBA1A PE=1 SV=1	CO6A1_HUMAN	2	5	3	0	2	0	3	2	1	0	4	2	10	1	1	2		Q71U36	1		Q71U36	1
1	P62834	RAP1A_HUMAN	Ras-related protein Rap-1A OS=Homo sapiens GN=RAP1A PE=1 SV=1	1C07_HUMAN	7	0	3	3	0	9	3	0	1	10	1	9	15	1	1	2		P62834	1		P62834	1
1	P01023	A2MG_HUMAN	Alpha-2-macroglobulin OS=Homo sapiens GN=A2M PE=1 SV=3	NCKP1_HUMAN	0	22	2	7	0	1	1	19	8	83	0	1	111	1	1	2		P01023	1		P01023	1
1	Q53GD3	CTL4_HUMAN	Choline transporter-like protein 4 OS=Homo sapiens GN=SLC44A4 PE=2 SV=2	VAMP2_HUMAN	0	2	0	2	0	12	1	1	3	13	3	12	21	1	1	2		Q53GD3	1		Q53GD3	1
1	P61224	RAP1B_HUMAN	Ras-related protein Rap-1b OS=Homo sapiens GN=RAP1B PE=1 SV=1	ALDOA_HUMAN	7	4	3	0	0	11	3	1	0	6	0	11	10	1	1	2		P61224	1		P61224	1
1	O15484	CAN5_HUMAN	Calpain-5 OS=Homo sapiens GN=CAPN5 PE=1 SV=2	4F2_HUMAN	2	0	3	2	0	8	4	1	1	6	1	8	13	1	1	2		O15484	1		O15484	1
1	Q1EHB4	SC5AC_HUMAN	Sodium-coupled monocarboxylate transporter 2 OS=Homo sapiens GN=SLC5A12 PE=2 SV=2	TAOK1_HUMAN	0	2	0	1	0	6	2	2	4	6	1	6	15	1	1	2		Q1EHB4	1		Q1EHB4	1
1	Q9HD42	CHM1A_HUMAN	Charged multivesicular body protein 1a OS=Homo sapiens GN=CHMP1A PE=1 SV=1	LYAG_HUMAN	4	0	1	0	4	6	6	2	4	2	1	10	15	1	1	2		Q9HD42	1		Q9HD42	1
1	P27348	1433T_HUMAN	14-3-3 protein theta OS=Homo sapiens GN=YWHAQ PE=1 SV=1	MEGF8_HUMAN	0	0	2	3	0	10	2	0	3	11	1	10	17	1	1	2		P27348	1		P27348	1
1	P62491	RB11A_HUMAN	Ras-related protein Rab-11A OS=Homo sapiens GN=RAB11A PE=1 SV=3	CADM4_HUMAN	0	0	4	2	1	3	2	4	3	0	1	4	10	1	1	2		P62491	1		P62491	1
1	Q9UGT4	SUSD2_HUMAN	Sushi domain-containing protein 2 OS=Homo sapiens GN=SUSD2 PE=1 SV=1	NHRF2_HUMAN	0	23	0	8	0	0	7	4	5	7	0	0	23	1	1	2		Q9UGT4	1		Q9UGT4	1
1	P04075	ALDOA_HUMAN	Fructose-bisphosphate aldolase A OS=Homo sapiens GN=ALDOA PE=1 SV=2	VTNC_HUMAN	4	22	0	4	0	10	0	5	0	5	0	10	10	1	1	2		P04075	1		P04075	1
1	Q7L7X3	TAOK1_HUMAN	Serine/threonine-protein kinase TAO1 OS=Homo sapiens GN=TAOK1 PE=1 SV=1	UPK3A_HUMAN	0	0	2	2	1	2	2	0	2	0	2	3	6	1	1	2		Q7L7X3	1		Q7L7X3	1
1	Q7Z7M0	MEGF8_HUMAN	Multiple epidermal growth factor-like domains protein 8 OS=Homo sapiens GN=MEGF8 PE=1 SV=2	IGHG3_HUMAN	0	32	6	22	0	0	8	4	7	0	0	0	19	1	1	2		Q7Z7M0	1		Q7Z7M0	1
1	Q8NFZ8	CADM4_HUMAN	Cell adhesion molecule 4 OS=Homo sapiens GN=CADM4 PE=1 SV=1	G3P_HUMAN	0	0	4	12	0	0	2	4	2	0	4	0	12	1	1	2		Q8NFZ8	1		Q8NFZ8	1
1	P60033	CD81_HUMAN	CD81 antigen OS=Homo sapiens GN=CD81 PE=1 SV=1	RHG18_HUMAN	0	4	0	0	0	2	2	2	2	7	1	2	14	1	1	2		P60033	1		P60033	1
1	Q8IX04	UEVLD_HUMAN	Ubiquitin-conjugating enzyme E2 variant 3 OS=Homo sapiens GN=UEVLD PE=1 SV=2	1B38_HUMAN	4	0	0	2	0	5	1	0	3	3	2	5	9	1	1	2		Q8IX04	1		Q8IX04	1
1	P30626	SORCN_HUMAN	Sorcin OS=Homo sapiens GN=SRI PE=1 SV=1	FA49B_HUMAN	1	0	2	1	0	7	0	2	2	4	2	7	10	1	1	2		P30626	1		P30626	1
1	Q7Z5L0	VMO1_HUMAN	Vitelline membrane outer layer protein 1 homolog OS=Homo sapiens GN=VMO1 PE=1 SV=1	RPGF3_HUMAN	0	0	3	7	0	1	10	9	11	1	3	1	34	1	1	2		Q7Z5L0	1		Q7Z5L0	1
1	O94832	MYO1D_HUMAN	Unconventional myosin-Id OS=Homo sapiens GN=MYO1D PE=1 SV=2	CD59_HUMAN	0	0	2	0	4	6	2	2	1	2	3	10	10	1	1	2		O94832	1		O94832	1
1	Q14108	SCRB2_HUMAN	Lysosome membrane protein 2 OS=Homo sapiens GN=SCARB2 PE=1 SV=2	STABP_HUMAN	0	2	0	0	0	3	0	2	3	6	5	3	16	1	1	2		Q14108	1		Q14108	1
1	Q9NRX5	SERC1_HUMAN	Serine incorporator 1 OS=Homo sapiens GN=SERINC1 PE=1 SV=1	AQP7_HUMAN	0	0	1	2	0	1	3	3	3	2	2	1	13	1	1	2		Q9NRX5	1		Q9NRX5	1
1	P12277	KCRB_HUMAN	Creatine kinase B-type OS=Homo sapiens GN=CKB PE=1 SV=1	TM7S3_HUMAN	0	8	1	2	3	20	4	0	4	14	1	23	23	1	1	2		P12277	1		P12277	1
1	P02748	CO9_HUMAN	Complement component C9 OS=Homo sapiens GN=C9 PE=1 SV=2	FAT4_HUMAN	0	8	3	5	0	0	1	2	3	4	0	0	10	1	1	2		P02748	1		P02748	1
1	P35030	TRY3_HUMAN	Trypsin-3 OS=Homo sapiens GN=PRSS3 PE=1 SV=2	CLN3_HUMAN	4	1	3	2	0	1	2	1	2	0	6	1	11	1	1	2		P35030	1		P35030	1
1	P22314	UBA1_HUMAN	Ubiquitin-like modifier-activating enzyme 1 OS=Homo sapiens GN=UBA1 PE=1 SV=3	KLK1_HUMAN	0	10	4	2	2	11	0	2	0	2	1	13	5	1	1	2		P22314	1		P22314	1
1	Q14393	GAS6_HUMAN	Growth arrest-specific protein 6 OS=Homo sapiens GN=GAS6 PE=1 SV=2	SND1_HUMAN	1	19	2	15	0	1	2	5	3	0	1	1	11	1	1	2		Q14393	1		Q14393	1
1	Q8NFJ5	RAI3_HUMAN	Retinoic acid-induced protein 3 OS=Homo sapiens GN=GPRC5A PE=1 SV=2	GLNA_HUMAN	2	1	1	5	0	4	3	1	2	2	1	4	9	1	1	2		Q8NFJ5	1		Q8NFJ5	1
1	Q92597	NDRG1_HUMAN	Protein NDRG1 OS=Homo sapiens GN=NDRG1 PE=1 SV=1	RAB7A_HUMAN	0	4	1	3	4	4	2	1	3	2	0	8	8	1	1	2		Q92597	1		Q92597	1
1	P13639	EF2_HUMAN	Elongation factor 2 OS=Homo sapiens GN=EEF2 PE=1 SV=4	RHOG_HUMAN	0	5	4	1	0	8	2	3	2	1	0	8	8	1	1	2		P13639	1		P13639	1
1	P60174	TPIS_HUMAN	Triosephosphate isomerase OS=Homo sapiens GN=TPI1 PE=1 SV=3	CYTM1_HUMAN	5	16	1	2	1	10	2	0	0	14	0	11	16	1	1	2		P60174	1		P60174	1
1	P07900	HS90A_HUMAN	Heat shock protein HSP 90-alpha OS=Homo sapiens GN=HSP90AA1 PE=1 SV=5	IDHC_HUMAN	0	12	4	2	0	17	2	0	0	6	0	17	8	1	1	2		P07900	1		P07900	1
1	P02766	TTHY_HUMAN	Transthyretin OS=Homo sapiens GN=TTR PE=1 SV=1	BASI_HUMAN	0	9	2	7	0	3	2	2	1	0	0	3	5	1	1	2		P02766	1		P02766	1
1	O14773	TPP1_HUMAN	Tripeptidyl-peptidase 1 OS=Homo sapiens GN=TPP1 PE=1 SV=2	CD81_HUMAN	0	5	0	7	2	0	5	3	6	3	1	2	18	1	1	2		O14773	1		O14773	1
1	P61769	B2MG_HUMAN	Beta-2-microglobulin OS=Homo sapiens GN=B2M PE=1 SV=1	MARCS_HUMAN	1	1	3	2	0	0	2	2	3	0	2	0	9	1	1	2		P61769	1		P61769	1
1	Q99536	VAT1_HUMAN	Synaptic vesicle membrane protein VAT-1 homolog OS=Homo sapiens GN=VAT1 PE=1 SV=2	GNAQ_HUMAN	1	1	2	1	0	5	2	2	2	10	1	5	17	1	1	2		Q99536	1		Q99536	1
1	Q9NP79	VTA1_HUMAN	Vacuolar protein sorting-associated protein VTA1 homolog OS=Homo sapiens GN=VTA1 PE=1 SV=1	NIT2_HUMAN	3	8	2	1	0	7	1	2	1	10	1	7	15	1	1	2		Q9NP79	1		Q9NP79	1
1	Q99969	RARR2_HUMAN	Retinoic acid receptor responder protein 2 OS=Homo sapiens GN=RARRES2 PE=1 SV=1	SO4C1_HUMAN	0	5	2	4	0	0	4	4	4	0	0	0	12	1	1	2		Q99969	1		Q99969	1
1	P31949	S10AB_HUMAN	Protein S100-A11 OS=Homo sapiens GN=S100A11 PE=1 SV=2	PCP_HUMAN	2	3	2	0	0	2	2	1	0	3	0	2	6	1	1	2		P31949	1		P31949	1
1	O94760	DDAH1_HUMAN	N(G),N(G)-dimethylarginine dimethylaminohydrolase 1 OS=Homo sapiens GN=DDAH1 PE=1 SV=3	MB12B_HUMAN	0	8	0	2	0	4	2	2	1	4	1	4	10	1	1	2		O94760	1		O94760	1
1	P53634	CATC_HUMAN	Dipeptidyl peptidase 1 OS=Homo sapiens GN=CTSC PE=1 SV=2	NSF_HUMAN	0	1	1	3	0	0	5	8	9	8	9	0	39	1	1	2		P53634	1		P53634	1
1	Q96PD5	PGRP2_HUMAN	N-acetylmuramoyl-L-alanine amidase OS=Homo sapiens GN=PGLYRP2 PE=1 SV=1	VP37D_HUMAN	0	15	0	11	0	0	14	7	8	2	0	0	31	1	1	2		Q96PD5	1		Q96PD5	1
1	Q9UBG3	CRNN_HUMAN	Cornulin OS=Homo sapiens GN=CRNN PE=1 SV=1	KIF3A_HUMAN	0	29	4	13	0	0	2	25	2	0	0	0	29	1	1	2		Q9UBG3	1		Q9UBG3	1
1	Q9BZG9	LYNX1_HUMAN	Ly-6/neurotoxin-like protein 1 OS=Homo sapiens GN=LYNX1 PE=1 SV=3	CATA_HUMAN	3	1	2	4	0	0	1	3	3	0	3	0	10	1	1	2		Q9BZG9	1		Q9BZG9	1
1	P18065	IBP2_HUMAN	Insulin-like growth factor-binding protein 2 OS=Homo sapiens GN=IGFBP2 PE=1 SV=2	1A25_HUMAN	0	9	2	23	0	1	14	16	21	0	1	1	52	1	1	2		P18065	1		P18065	1
1	P01714	LV301_HUMAN	Ig lambda chain V-III region SH OS=Homo sapiens PE=1 SV=1	PTGR1_HUMAN	0	3	1	2	0	1	3	2	2	2	1	1	10	1	1	2		P01714	1		P01714	1
1	P25311	ZA2G_HUMAN	Zinc-alpha-2-glycoprotein OS=Homo sapiens GN=AZGP1 PE=1 SV=2	CFAB_HUMAN	3	1	2	4	0	17	11	1	1	2	1	17	16	1	1	2		P25311	1		P25311	1
1	Q5JWF2	GNAS1_HUMAN	Guanine nucleotide-binding protein G(s) subunit alpha isoforms XLas OS=Homo sapiens GN=GNAS PE=1 SV=2	CLD10_HUMAN	7	3	2	0	0	6	0	5	0	5	0	6	10	1	1	2		Q5JWF2	1		Q5JWF2	1
1	O95967	FBLN4_HUMAN	EGF-containing fibulin-like extracellular matrix protein 2 OS=Homo sapiens GN=EFEMP2 PE=1 SV=3	PLS3_HUMAN	0	2	4	10	0	0	3	6	5	0	0	0	14	1	1	2		O95967	1		O95967	1
1	P0C0L4	CO4A_HUMAN	Complement C4-A OS=Homo sapiens GN=C4A PE=1 SV=2	ITB1_HUMAN	2	49	0	0	0	6	1	13	12	21	0	6	47	1	1	2		P0C0L4	1		P0C0L4	1
1	Q9HC84	MUC5B_HUMAN	Mucin-5B OS=Homo sapiens GN=MUC5B PE=1 SV=3	TM1L1_HUMAN	0	0	2	0	0	2	50	25	0	25	21	2	121	1	1	2		Q9HC84	1		Q9HC84	1
1	P01861	IGHG4_HUMAN	Ig gamma-4 chain C region OS=Homo sapiens GN=IGHG4 PE=1 SV=1	AMYP_HUMAN	0	14	0	14	0	6	10	0	0	33	4	6	47	1	1	2		P01861	1		P01861	1
1	Q07654	TFF3_HUMAN	Trefoil factor 3 OS=Homo sapiens GN=TFF3 PE=1 SV=1	ACSL4_HUMAN	0	0	6	1	0	2	3	2	2	0	3	2	10	1	1	2		Q07654	1		Q07654	1
1	Q9H2G2	SLK_HUMAN	STE20-like serine/threonine-protein kinase OS=Homo sapiens GN=SLK PE=1 SV=1	VTDB_HUMAN	0	1	4	1	0	9	3	2	1	2	1	9	9	1	1	2		Q9H2G2	1		Q9H2G2	1
1	Q9UBP0	SPAST_HUMAN	Spastin OS=Homo sapiens GN=SPAST PE=1 SV=1	PRDX5_HUMAN	0	0	0	1	0	3	2	4	3	2	0	3	11	1	1	2		Q9UBP0	1		Q9UBP0	1
1	Q9H9H4	VP37B_HUMAN	Vacuolar protein sorting-associated protein 37B OS=Homo sapiens GN=VPS37B PE=1 SV=1	CAH2_HUMAN	3	0	2	3	0	6	1	1	1	9	1	6	13	1	1	2		Q9H9H4	1		Q9H9H4	1
1	P30086	PEBP1_HUMAN	Phosphatidylethanolamine-binding protein 1 OS=Homo sapiens GN=PEBP1 PE=1 SV=3	ANO6_HUMAN	3	5	0	0	0	9	2	1	0	9	0	9	12	1	1	2		P30086	1		P30086	1
1	P49006	MRP_HUMAN	MARCKS-related protein OS=Homo sapiens GN=MARCKSL1 PE=1 SV=2	RHOA_HUMAN	2	0	3	1	0	2	3	3	1	0	1	2	8	1	1	2		P49006	1		P49006	1
1	Q9H223	EHD4_HUMAN	EH domain-containing protein 4 OS=Homo sapiens GN=EHD4 PE=1 SV=1	AOC1_HUMAN	7	0	1	0	0	15	2	2	0	14	0	15	18	1	1	2		Q9H223	1		Q9H223	1
1	P23528	COF1_HUMAN	Cofilin-1 OS=Homo sapiens GN=CFL1 PE=1 SV=3	UEVLD_HUMAN	0	1	1	1	0	4	3	2	1	6	3	4	15	1	1	2		P23528	1		P23528	1
1	Q6P531	GGT6_HUMAN	Gamma-glutamyltransferase 6 OS=Homo sapiens GN=GGT6 PE=2 SV=2	IBP7_HUMAN	0	7	2	3	2	0	1	2	3	0	0	2	6	1	1	2		Q6P531	1		Q6P531	1
1	P16152	CBR1_HUMAN	Carbonyl reductase [NADPH] 1 OS=Homo sapiens GN=CBR1 PE=1 SV=3	PPAP_HUMAN	1	12	0	3	3	4	1	0	2	7	1	7	11	1	1	2		P16152	1		P16152	1
1	Q13277	STX3_HUMAN	Syntaxin-3 OS=Homo sapiens GN=STX3 PE=1 SV=3	FA63A_HUMAN	0	0	0	1	0	2	4	2	0	4	4	2	14	1	1	2		Q13277	1		Q13277	1
1	Q8N3R9	MPP5_HUMAN	MAGUK p55 subfamily member 5 OS=Homo sapiens GN=MPP5 PE=1 SV=3	BDH2_HUMAN	1	0	2	0	0	4	1	1	2	2	6	4	12	1	1	2		Q8N3R9	1		Q8N3R9	1
1	Q9NS93	TM7S3_HUMAN	Transmembrane 7 superfamily member 3 OS=Homo sapiens GN=TM7SF3 PE=2 SV=1	SORCN_HUMAN	3	0	0	1	4	2	1	1	3	5	2	6	12	1	1	2		Q9NS93	1		Q9NS93	1
1	Q86XT2	VP37D_HUMAN	Vacuolar protein sorting-associated protein 37D OS=Homo sapiens GN=VPS37D PE=1 SV=2	FABPH_HUMAN	1	2	0	1	0	5	2	3	1	3	1	5	10	1	1	2		Q86XT2	1		Q86XT2	1
1	P07948	LYN_HUMAN	Tyrosine-protein kinase Lyn OS=Homo sapiens GN=LYN PE=1 SV=3	MYO6_HUMAN	0	0	3	3	0	1	0	3	2	0	2	1	7	1	1	2		P07948	1		P07948	1
1	Q16651	PRSS8_HUMAN	Prostasin OS=Homo sapiens GN=PRSS8 PE=1 SV=1	PPR21_HUMAN	0	1	1	5	0	0	3	3	3	0	2	0	11	1	1	2		Q16651	1		Q16651	1
1	P29401	TKT_HUMAN	Transketolase OS=Homo sapiens GN=TKT PE=1 SV=3	TOM1_HUMAN	0	5	0	1	0	2	1	6	4	6	0	2	17	1	1	2		P29401	1		P29401	1
1	O43175	SERA_HUMAN	D-3-phosphoglycerate dehydrogenase OS=Homo sapiens GN=PHGDH PE=1 SV=4	S39A4_HUMAN	0	1	2	2	0	4	0	0	2	1	3	4	6	1	1	2		O43175	1		O43175	1
1	P21926	CD9_HUMAN	CD9 antigen OS=Homo sapiens GN=CD9 PE=1 SV=4	VMO1_HUMAN	3	3	1	0	1	6	1	1	1	2	2	7	7	1	1	2		P21926	1		P21926	1
1	P01620	KV302_HUMAN	Ig kappa chain V-III region SIE OS=Homo sapiens PE=1 SV=1	WASF2_HUMAN	0	9	3	0	0	4	0	0	0	10	2	4	12	1	1	2		P01620	1		P01620	1
1	Q13113	PDZ1I_HUMAN	PDZK1-interacting protein 1 OS=Homo sapiens GN=PDZK1IP1 PE=1 SV=1	TM1L2_HUMAN	0	2	0	1	0	1	2	3	4	3	1	1	13	1	1	2		Q13113	1		Q13113	1
1	Q9C0H2	TTYH3_HUMAN	Protein tweety homolog 3 OS=Homo sapiens GN=TTYH3 PE=1 SV=3	RAB10_HUMAN	0	0	0	1	0	2	5	0	4	8	2	2	19	1	1	2		Q9C0H2	1		Q9C0H2	1
1	P15313	VATB1_HUMAN	V-type proton ATPase subunit B, kidney isoform OS=Homo sapiens GN=ATP6V1B1 PE=1 SV=3	MKS3_HUMAN	0	0	1	4	0	6	0	0	4	6	2	6	12	1	1	2		P15313	1		P15313	1
1	Q00796	DHSO_HUMAN	Sorbitol dehydrogenase OS=Homo sapiens GN=SORD PE=1 SV=4	MYO1D_HUMAN	0	4	0	1	0	18	3	2	1	5	0	18	11	1	1	2		Q00796	1		Q00796	1
1	Q9UBX5	FBLN5_HUMAN	Fibulin-5 OS=Homo sapiens GN=FBLN5 PE=1 SV=1	WDR1_HUMAN	1	3	2	3	0	0	1	3	3	0	1	0	8	1	1	2		Q9UBX5	1		Q9UBX5	1
1	P11117	PPAL_HUMAN	Lysosomal acid phosphatase OS=Homo sapiens GN=ACP2 PE=1 SV=3	SLC31_HUMAN	0	9	1	6	0	0	3	3	2	1	1	0	10	1	1	2		P11117	1		P11117	1
1	P10619	PPGB_HUMAN	Lysosomal protective protein OS=Homo sapiens GN=CTSA PE=1 SV=2	AT1A1_HUMAN	3	3	0	1	5	5	1	1	1	9	2	10	14	1	1	2		P10619	1		P10619	1
1	P06703	S10A6_HUMAN	Protein S100-A6 OS=Homo sapiens GN=S100A6 PE=1 SV=1	PROF2_HUMAN	4	2	0	2	1	5	0	1	0	2	1	6	4	1	1	2		P06703	1		P06703	1
1	P06858	LIPL_HUMAN	Lipoprotein lipase OS=Homo sapiens GN=LPL PE=1 SV=1	CHM4A_HUMAN	0	4	0	3	0	0	2	2	3	0	0	0	7	1	1	2		P06858	1		P06858	1
1	P22748	CAH4_HUMAN	Carbonic anhydrase 4 OS=Homo sapiens GN=CA4 PE=1 SV=2	SC5A9_HUMAN	3	1	1	1	0	4	1	2	2	2	1	4	8	1	1	2		P22748	1		P22748	1
1	Q9Y6R7	FCGBP_HUMAN	IgGFc-binding protein OS=Homo sapiens GN=FCGBP PE=1 SV=3	LYN_HUMAN	0	0	0	1	1	4	3	1	8	18	2	5	32	1	1	2		Q9Y6R7	1		Q9Y6R7	1
1	P84085	ARF5_HUMAN	ADP-ribosylation factor 5 OS=Homo sapiens GN=ARF5 PE=1 SV=2	KCD12_HUMAN	0	0	2	1	0	4	4	1	2	0	3	4	10	1	1	2		P84085	1		P84085	1
1	O43707	ACTN4_HUMAN	Alpha-actinin-4 OS=Homo sapiens GN=ACTN4 PE=1 SV=2	THIO_HUMAN	0	16	0	1	0	4	1	4	2	5	0	4	12	1	1	2		O43707	1		O43707	1
1	P17927	CR1_HUMAN	Complement receptor type 1 OS=Homo sapiens GN=CR1 PE=1 SV=3	CF132_HUMAN	0	3	0	6	0	0	0	7	6	4	0	0	17	1	1	2		P17927	1		P17927	1
1	P21399	ACOC_HUMAN	Cytoplasmic aconitate hydratase OS=Homo sapiens GN=ACO1 PE=1 SV=3	MOT5_HUMAN	0	23	1	2	0	0	1	2	2	6	0	0	11	1	1	2		P21399	1		P21399	1
1	O43657	TSN6_HUMAN	Tetraspanin-6 OS=Homo sapiens GN=TSPAN6 PE=1 SV=1	DYRK2_HUMAN	0	1	0	2	0	8	0	1	2	6	2	8	11	1	1	2		O43657	1		O43657	1
1	P13164	IFM1_HUMAN	Interferon-induced transmembrane protein 1 OS=Homo sapiens GN=IFITM1 PE=1 SV=3	HV304_HUMAN	0	0	0	2	6	2	3	2	2	1	0	8	8	1	1	2		P13164	1		P13164	1
1	P62258	1433E_HUMAN	14-3-3 protein epsilon OS=Homo sapiens GN=YWHAE PE=1 SV=1	S13A2_HUMAN	7	11	2	0	0	11	1	0	1	16	1	11	19	1	1	2		P62258	1		P62258	1
1	P01769	HV308_HUMAN	Ig heavy chain V-III region GA OS=Homo sapiens PE=1 SV=1	ACPH_HUMAN	0	2	1	2	0	0	1	2	4	4	1	0	12	1	1	2		P01769	1		P01769	1
1	P54802	ANAG_HUMAN	Alpha-N-acetylglucosaminidase OS=Homo sapiens GN=NAGLU PE=1 SV=2	BCR_HUMAN	1	39	1	5	0	0	5	2	1	4	0	0	12	1	1	2		P54802	1		P54802	1
1	P15151	PVR_HUMAN	Poliovirus receptor OS=Homo sapiens GN=PVR PE=1 SV=2	PRSS8_HUMAN	0	2	4	3	1	0	2	1	2	0	1	1	6	1	1	2		P15151	1		P15151	1
1	Q8TF72	SHRM3_HUMAN	Protein Shroom3 OS=Homo sapiens GN=SHROOM3 PE=1 SV=2	MFS12_HUMAN	6	1	2	1	0	1	2	0	2	0	2	1	6	1	1	2		Q8TF72	1		Q8TF72	1
1	Q9HCU0	CD248_HUMAN	Endosialin OS=Homo sapiens GN=CD248 PE=1 SV=1	TKT_HUMAN	0	0	2	4	0	0	2	0	3	0	3	0	8	1	1	2		Q9HCU0	1		Q9HCU0	1
1	P07858	CATB_HUMAN	Cathepsin B OS=Homo sapiens GN=CTSB PE=1 SV=3	AKA12_HUMAN	1	4	0	2	0	0	2	2	1	4	0	0	9	1	1	2		P07858	1		P07858	1
1	P08571	CD14_HUMAN	Monocyte differentiation antigen CD14 OS=Homo sapiens GN=CD14 PE=1 SV=2	SCRB2_HUMAN	1	19	2	8	0	1	1	7	0	0	2	1	10	1	1	2		P08571	1		P08571	1
1	Q02818	NUCB1_HUMAN	Nucleobindin-1 OS=Homo sapiens GN=NUCB1 PE=1 SV=4	STRAB_HUMAN	0	2	2	9	0	0	4	1	4	0	1	0	10	1	1	2		Q02818	1		Q02818	1
1	P02533	K1C14_HUMAN	Keratin, type I cytoskeletal 14 OS=Homo sapiens GN=KRT14 PE=1 SV=4	RHOF_HUMAN	11	2	2	0	0	5	0	0	0	0	2	5	2	1	1	2		P02533	1		P02533	1
1	Q86UD1	OAF_HUMAN	Out at first protein homolog OS=Homo sapiens GN=OAF PE=2 SV=1	ITAV_HUMAN	0	5	2	2	0	0	3	1	2	0	0	0	6	1	1	2		Q86UD1	1		Q86UD1	1
1	Q96NY8	PVRL4_HUMAN	Nectin-4 OS=Homo sapiens GN=PVRL4 PE=1 SV=1	PROZ_HUMAN	0	3	0	7	0	0	2	4	0	0	2	0	8	1	1	2		Q96NY8	1		Q96NY8	1
1	P39059	COFA1_HUMAN	Collagen alpha-1(XV) chain OS=Homo sapiens GN=COL15A1 PE=1 SV=2	WASF3_HUMAN	4	28	1	8	0	0	1	3	3	0	1	0	8	1	1	2		P39059	1		P39059	1
1	P12111	CO6A3_HUMAN	Collagen alpha-3(VI) chain OS=Homo sapiens GN=COL6A3 PE=1 SV=5	DBNL_HUMAN	3	11	2	1	0	0	1	4	2	0	1	0	8	1	1	2		P12111	1		P12111	1
1	Q14515	SPRL1_HUMAN	SPARC-like protein 1 OS=Homo sapiens GN=SPARCL1 PE=1 SV=2	ITM2B_HUMAN	0	6	2	7	0	0	1	2	6	0	0	0	9	1	1	2		Q14515	1		Q14515	1
1	P61970	NTF2_HUMAN	Nuclear transport factor 2 OS=Homo sapiens GN=NUTF2 PE=1 SV=1	CRIP2_HUMAN	0	20	2	0	0	2	1	2	0	2	0	2	5	1	1	2		P61970	1		P61970	1
1	P08603	CFAH_HUMAN	Complement factor H OS=Homo sapiens GN=CFH PE=1 SV=4	CPNE8_HUMAN	0	21	0	9	0	0	8	22	25	1	0	0	56	1	1	2		P08603	1		P08603	1
1	Q14314	FGL2_HUMAN	Fibroleukin OS=Homo sapiens GN=FGL2 PE=1 SV=1	T179B_HUMAN	0	8	0	2	0	0	1	2	3	8	0	0	14	1	1	2		Q14314	1		Q14314	1
1	P62820	RAB1A_HUMAN	Ras-related protein Rab-1A OS=Homo sapiens GN=RAB1A PE=1 SV=3	1433G_HUMAN	5	0	2	0	0	11	2	0	1	7	1	11	11	1	1	2		P62820	1		P62820	1
1	P02671	FIBA_HUMAN	Fibrinogen alpha chain OS=Homo sapiens GN=FGA PE=1 SV=2	THY1_HUMAN	0	6	1	2	0	2	1	12	5	1	0	2	19	1	1	2		P02671	1		P02671	1
1	P69905	HBA_HUMAN	Hemoglobin subunit alpha OS=Homo sapiens GN=HBA1 PE=1 SV=2	SH3K1_HUMAN	0	18	0	3	0	2	0	2	0	6	0	2	8	1	1	2		P69905	1		P69905	1
1	Q969E1	LEAP2_HUMAN	Liver-expressed antimicrobial peptide 2 OS=Homo sapiens GN=LEAP2 PE=1 SV=1	TB10A_HUMAN	1	1	2	3	0	0	2	3	3	0	1	0	9	1	1	2		Q969E1	1		Q969E1	1
1	Q15833	STXB2_HUMAN	Syntaxin-binding protein 2 OS=Homo sapiens GN=STXBP2 PE=1 SV=2	IQGA1_HUMAN	2	1	1	0	0	6	2	0	2	11	0	6	15	1	1	2		Q15833	1		Q15833	1
1	P23142	FBLN1_HUMAN	Fibulin-1 OS=Homo sapiens GN=FBLN1 PE=1 SV=4	RALB_HUMAN	0	15	1	11	0	0	0	10	20	0	2	0	32	1	1	2		P23142	1		P23142	1
1	B9A064	IGLL5_HUMAN	Immunoglobulin lambda-like polypeptide 5 OS=Homo sapiens GN=IGLL5 PE=2 SV=2	RAB7L_HUMAN	0	16	0	9	0	0	0	14	0	33	7	0	54	1	1	2		B9A064	1		B9A064	1
1	P11021	GRP78_HUMAN	78 kDa glucose-regulated protein OS=Homo sapiens GN=HSPA5 PE=1 SV=2	PAK4_HUMAN	0	16	4	11	0	0	3	5	0	0	0	0	8	1	1	2		P11021	1		P11021	1
1	O00187	MASP2_HUMAN	Mannan-binding lectin serine protease 2 OS=Homo sapiens GN=MASP2 PE=1 SV=4	MERL_HUMAN	0	2	0	24	0	2	6	3	1	0	0	2	10	1	1	2		O00187	1		O00187	1
1	Q6UX06	OLFM4_HUMAN	Olfactomedin-4 OS=Homo sapiens GN=OLFM4 PE=1 SV=1	KPCD_HUMAN	0	11	0	3	0	17	2	0	1	23	0	17	26	1	1	2		Q6UX06	1		Q6UX06	1
1	P05067	A4_HUMAN	Amyloid beta A4 protein OS=Homo sapiens GN=APP PE=1 SV=3	AAAT_HUMAN	2	0	2	7	0	2	1	0	1	0	2	2	4	1	1	2		P05067	1		P05067	1
1	P02750	A2GL_HUMAN	Leucine-rich alpha-2-glycoprotein OS=Homo sapiens GN=LRG1 PE=1 SV=2	CEL_HUMAN	0	5	0	3	0	2	3	7	0	0	0	2	10	1	1	2		P02750	1		P02750	1
1	Q12907	LMAN2_HUMAN	Vesicular integral-membrane protein VIP36 OS=Homo sapiens GN=LMAN2 PE=1 SV=1	LTOR1_HUMAN	1	16	3	7	0	1	6	2	1	0	0	1	9	1	1	2		Q12907	1		Q12907	1
1	P35555	FBN1_HUMAN	Fibrillin-1 OS=Homo sapiens GN=FBN1 PE=1 SV=3	SERC1_HUMAN	0	0	2	0	1	0	2	4	4	0	8	1	18	1	1	2		P35555	1		P35555	1
1	P24593	IBP5_HUMAN	Insulin-like growth factor-binding protein 5 OS=Homo sapiens GN=IGFBP5 PE=1 SV=1	KCRB_HUMAN	0	3	0	4	0	0	2	2	2	0	0	0	6	1	1	2		P24593	1		P24593	1
1	P02743	SAMP_HUMAN	Serum amyloid P-component OS=Homo sapiens GN=APCS PE=1 SV=2	NPC2_HUMAN	0	2	0	3	1	1	2	5	2	0	0	2	9	1	1	2		P02743	1		P02743	1
1	Q93099	HGD_HUMAN	Homogentisate 1,2-dioxygenase OS=Homo sapiens GN=HGD PE=1 SV=2	PNPH_HUMAN	0	4	0	0	1	3	0	2	2	3	0	4	7	1	1	2		Q93099	1		Q93099	1
1	O75594	PGRP1_HUMAN	Peptidoglycan recognition protein 1 OS=Homo sapiens GN=PGLYRP1 PE=1 SV=1	FA65A_HUMAN	1	14	1	10	0	2	7	2	0	0	0	2	9	1	1	2		O75594	1		O75594	1
1	P01593	KV101_HUMAN	Ig kappa chain V-I region AG OS=Homo sapiens PE=1 SV=1	SRGP3_HUMAN	0	8	0	2	0	0	4	7	0	12	0	0	23	1	1	2		P01593	1		P01593	1
1	P36980	FHR2_HUMAN	Complement factor H-related protein 2 OS=Homo sapiens GN=CFHR2 PE=1 SV=1	PKHB2_HUMAN	0	3	0	4	0	0	3	3	4	0	0	0	10	1	1	2		P36980	1		P36980	1
1	Q99988	GDF15_HUMAN	Growth/differentiation factor 15 OS=Homo sapiens GN=GDF15 PE=1 SV=3	RHG01_HUMAN	0	0	0	2	0	0	3	3	6	0	2	0	14	1	1	2		Q99988	1		Q99988	1
1	P29992	GNA11_HUMAN	Guanine nucleotide-binding protein subunit alpha-11 OS=Homo sapiens GN=GNA11 PE=1 SV=2	SBP1_HUMAN	3	3	0	1	0	4	0	0	1	4	0	4	5	1	1	2		P29992	1		P29992	1
1	Q9Y6E0	STK24_HUMAN	Serine/threonine-protein kinase 24 OS=Homo sapiens GN=STK24 PE=1 SV=1	ASSY_HUMAN	2	0	0	0	0	1	3	0	2	2	1	1	8	1	1	2		Q9Y6E0	1		Q9Y6E0	1
1	Q9UKS6	PACN3_HUMAN	Protein kinase C and casein kinase substrate in neurons protein 3 OS=Homo sapiens GN=PACSIN3 PE=1 SV=2	SERA_HUMAN	1	0	2	1	0	2	4	1	4	1	0	2	10	1	1	2		Q9UKS6	1		Q9UKS6	1
1	Q9NZV1	CRIM1_HUMAN	Cysteine-rich motor neuron 1 protein OS=Homo sapiens GN=CRIM1 PE=1 SV=1	VASN_HUMAN	0	0	2	1	5	0	2	2	4	0	1	5	9	1	1	2		Q9NZV1	1		Q9NZV1	1
1	P54289	CA2D1_HUMAN	Voltage-dependent calcium channel subunit alpha-2/delta-1 OS=Homo sapiens GN=CACNA2D1 PE=1 SV=3	CYFP1_HUMAN	0	0	0	3	0	1	3	3	3	1	1	1	11	1	1	2		P54289	1		P54289	1
1	P08133	ANXA6_HUMAN	Annexin A6 OS=Homo sapiens GN=ANXA6 PE=1 SV=3	GDIR1_HUMAN	1	3	0	0	2	13	2	1	0	33	1	15	37	1	1	2		P08133	1		P08133	1
1	P54707	AT12A_HUMAN	Potassium-transporting ATPase alpha chain 2 OS=Homo sapiens GN=ATP12A PE=1 SV=3	EPIPL_HUMAN	0	0	2	1	0	0	2	0	2	0	4	0	8	1	1	2		P54707	1		P54707	1
1	O75363	BCAS1_HUMAN	Breast carcinoma-amplified sequence 1 OS=Homo sapiens GN=BCAS1 PE=1 SV=2	SHPS1_HUMAN	3	0	2	0	0	7	1	4	0	0	1	7	6	1	1	2		O75363	1		O75363	1
1	Q9H4G4	GAPR1_HUMAN	Golgi-associated plant pathogenesis-related protein 1 OS=Homo sapiens GN=GLIPR2 PE=1 SV=3	MYADM_HUMAN	0	0	0	0	0	4	2	2	0	3	1	4	8	1	1	2		Q9H4G4	1		Q9H4G4	1
1	P30085	KCY_HUMAN	UMP-CMP kinase OS=Homo sapiens GN=CMPK1 PE=1 SV=3	ADSV_HUMAN	0	1	0	0	0	3	2	0	3	1	2	3	8	1	1	2		P30085	1		P30085	1
1	Q969X1	LFG3_HUMAN	Protein lifeguard 3 OS=Homo sapiens GN=TMBIM1 PE=1 SV=2	SRC_HUMAN	0	1	0	0	0	2	1	1	2	2	2	2	8	1	1	2		Q969X1	1		Q969X1	1
1	P63092	GNAS2_HUMAN	Guanine nucleotide-binding protein G(s) subunit alpha isoforms short OS=Homo sapiens GN=GNAS PE=1 SV=1	RAC1_HUMAN	0	0	0	5	0	0	5	0	4	0	5	0	14	1	1	2		P63092	1		P63092	1
1	A5D8V6	VP37C_HUMAN	Vacuolar protein sorting-associated protein 37C OS=Homo sapiens GN=VPS37C PE=1 SV=2	RFFL_HUMAN	2	0	0	0	0	5	1	0	0	8	2	5	11	1	1	2		A5D8V6	1		A5D8V6	1
1	P62070	RRAS2_HUMAN	Ras-related protein R-Ras2 OS=Homo sapiens GN=RRAS2 PE=1 SV=1	KRIT1_HUMAN	1	1	2	1	0	3	1	2	1	4	1	3	9	1	1	2		P62070	1		P62070	1
1	P14174	MIF_HUMAN	Macrophage migration inhibitory factor OS=Homo sapiens GN=MIF PE=1 SV=4	RAP2B_HUMAN	0	2	1	1	0	1	4	1	3	0	2	1	10	1	1	2		P14174	1		P14174	1
1	Q9BVM4	GGACT_HUMAN	Gamma-glutamylaminecyclotransferase OS=Homo sapiens GN=GGACT PE=1 SV=2	MVP_HUMAN	0	3	0	1	0	0	1	3	2	2	1	0	9	1	1	2		Q9BVM4	1		Q9BVM4	1
1	Q7Z4W1	DCXR_HUMAN	L-xylulose reductase OS=Homo sapiens GN=DCXR PE=1 SV=2	PRDX6_HUMAN	0	5	0	1	0	8	1	3	1	4	1	8	10	1	1	2		Q7Z4W1	1		Q7Z4W1	1
1	P12429	ANXA3_HUMAN	Annexin A3 OS=Homo sapiens GN=ANXA3 PE=1 SV=3	TPPP3_HUMAN	0	0	0	0	0	14	0	4	1	3	2	14	10	1	1	2		P12429	1		P12429	1
1	Q3SXY8	AR13B_HUMAN	ADP-ribosylation factor-like protein 13B OS=Homo sapiens GN=ARL13B PE=1 SV=1	RNAS2_HUMAN	0	0	0	2	7	2	1	1	2	1	2	9	7	1	1	2		Q3SXY8	1		Q3SXY8	1
1	Q6W4X9	MUC6_HUMAN	Mucin-6 OS=Homo sapiens GN=MUC6 PE=1 SV=3	TAOK3_HUMAN	2	1	4	7	0	0	0	0	0	0	10	0	10	1	1	2		Q6W4X9	1		Q6W4X9	1
1	P02774	VTDB_HUMAN	Vitamin D-binding protein OS=Homo sapiens GN=GC PE=1 SV=1	ZDHC1_HUMAN	0	6	0	3	0	0	0	0	2	4	0	0	6	1	1	2		P02774	1		P02774	1
1	Q4KMQ2	ANO6_HUMAN	Anoctamin-6 OS=Homo sapiens GN=ANO6 PE=1 SV=2	CE104_HUMAN	0	0	0	2	0	3	2	1	2	1	0	3	6	1	1	2		Q4KMQ2	1		Q4KMQ2	1
1	P35080	PROF2_HUMAN	Profilin-2 OS=Homo sapiens GN=PFN2 PE=1 SV=3	MYO1B_HUMAN	0	0	2	3	0	2	2	1	1	0	1	2	5	1	1	2		P35080	1		P35080	1
1	P61981	1433G_HUMAN	14-3-3 protein gamma OS=Homo sapiens GN=YWHAG PE=1 SV=2	KAP0_HUMAN	3	6	0	0	0	9	0	0	0	8	0	9	8	1	1	2		P61981	1		P61981	1
1	P04216	THY1_HUMAN	Thy-1 membrane glycoprotein OS=Homo sapiens GN=THY1 PE=1 SV=2	TRIP6_HUMAN	2	4	0	0	0	3	0	0	0	3	0	3	3	1	1	2		P04216	1		P04216	1
1	P11234	RALB_HUMAN	Ras-related protein Ral-B OS=Homo sapiens GN=RALB PE=1 SV=1	EF1A1_HUMAN	0	0	0	0	0	5	3	3	1	5	0	5	12	1	1	2		P11234	1		P11234	1
1	P00491	PNPH_HUMAN	Purine nucleoside phosphorylase OS=Homo sapiens GN=PNP PE=1 SV=2	CAN6_HUMAN	0	19	1	1	0	2	0	2	1	2	0	2	5	1	1	2		P00491	1		P00491	1
1	Q13228	SBP1_HUMAN	Selenium-binding protein 1 OS=Homo sapiens GN=SELENBP1 PE=1 SV=2	PP1B_HUMAN	0	4	0	0	0	4	3	1	0	2	0	4	6	1	1	2		Q13228	1		Q13228	1
1	P52565	GDIR1_HUMAN	Rho GDP-dissociation inhibitor 1 OS=Homo sapiens GN=ARHGDIA PE=1 SV=3	WWP2_HUMAN	0	4	1	0	0	5	2	1	0	1	2	5	6	1	1	2		P52565	1		P52565	1
1	Q9Y6U3	ADSV_HUMAN	Adseverin OS=Homo sapiens GN=SCIN PE=1 SV=4	BST2_HUMAN	0	2	0	0	0	0	0	3	2	1	2	0	8	1	1	2		Q9Y6U3	1		Q9Y6U3	1
1	P63000	RAC1_HUMAN	Ras-related C3 botulinum toxin substrate 1 OS=Homo sapiens GN=RAC1 PE=1 SV=1	DNPH1_HUMAN	4	3	0	0	0	3	0	0	0	4	0	3	4	1	1	2		P63000	1		P63000	1
1	Q9UI12	VATH_HUMAN	V-type proton ATPase subunit H OS=Homo sapiens GN=ATP6V1H PE=1 SV=1	GRB2_HUMAN	0	0	0	0	0	3	1	0	4	4	2	3	11	1	1	2		Q9UI12	1		Q9UI12	1
1	P09972	ALDOC_HUMAN	Fructose-bisphosphate aldolase C OS=Homo sapiens GN=ALDOC PE=1 SV=2	PSA3_HUMAN	0	8	0	2	0	4	0	5	0	1	0	4	6	1	1	2		P09972	1		P09972	1
1	P09467	F16P1_HUMAN	Fructose-1,6-bisphosphatase 1 OS=Homo sapiens GN=FBP1 PE=1 SV=5	UBE2N_HUMAN	0	25	0	3	0	5	0	0	0	4	0	5	4	1	1	2		P09467	1		P09467	1
1	Q9UGM3	DMBT1_HUMAN	Deleted in malignant brain tumors 1 protein OS=Homo sapiens GN=DMBT1 PE=1 SV=2	CTDS1_HUMAN	0	0	0	0	0	2	3	0	2	3	0	2	8	1	1	2		Q9UGM3	1		Q9UGM3	1
1	P29508	SPB3_HUMAN	Serpin B3 OS=Homo sapiens GN=SERPINB3 PE=1 SV=2	MINK1_HUMAN	0	91	4	9	0	0	0	19	0	1	0	0	20	1	1	2		P29508	1		P29508	1
1	P36871	PGM1_HUMAN	Phosphoglucomutase-1 OS=Homo sapiens GN=PGM1 PE=1 SV=3	K1C9_HUMAN	0	5	0	2	2	2	1	0	0	3	0	4	4	1	1	2		P36871	1		P36871	1
1	P11279	LAMP1_HUMAN	Lysosome-associated membrane glycoprotein 1 OS=Homo sapiens GN=LAMP1 PE=1 SV=3	SH3B4_HUMAN	0	0	0	0	0	3	1	1	2	3	4	3	11	1	1	2		P11279	1		P11279	1
1	Q9HAT2	SIAE_HUMAN	Sialate O-acetylesterase OS=Homo sapiens GN=SIAE PE=1 SV=1	PLXB2_HUMAN	1	2	1	4	0	1	4	1	3	0	0	1	8	1	1	2		Q9HAT2	1		Q9HAT2	1
1	P05937	CALB1_HUMAN	Calbindin OS=Homo sapiens GN=CALB1 PE=1 SV=2	SDSL_HUMAN	2	2	0	0	0	5	0	0	0	10	0	5	10	1	1	2		P05937	1		P05937	1
1	P84077	ARF1_HUMAN	ADP-ribosylation factor 1 OS=Homo sapiens GN=ARF1 PE=1 SV=2	CLIC1_HUMAN	5	5	0	0	0	7	0	0	0	15	0	7	15	1	1	2		P84077	1		P84077	1
1	Q06830	PRDX1_HUMAN	Peroxiredoxin-1 OS=Homo sapiens GN=PRDX1 PE=1 SV=1	REPS2_HUMAN	3	6	0	0	0	13	0	0	0	11	0	13	11	1	1	2		Q06830	1		Q06830	1
1	O75787	RENR_HUMAN	Renin receptor OS=Homo sapiens GN=ATP6AP2 PE=1 SV=2	RAB14_HUMAN	0	7	0	4	0	0	2	0	0	3	0	0	5	1	1	2		O75787	1		O75787	1
1	Q9UBC9	SPRR3_HUMAN	Small proline-rich protein 3 OS=Homo sapiens GN=SPRR3 PE=1 SV=2	S15A2_HUMAN	0	4	2	3	0	0	0	9	0	0	0	0	9	1	1	2		Q9UBC9	1		Q9UBC9	1
1	P21281	VATB2_HUMAN	V-type proton ATPase subunit B, brain isoform OS=Homo sapiens GN=ATP6V1B2 PE=1 SV=3	CK052_HUMAN	0	1	1	0	0	2	2	2	0	3	1	2	8	1	1	2		P21281	1		P21281	1
1	Q15181	IPYR_HUMAN	Inorganic pyrophosphatase OS=Homo sapiens GN=PPA1 PE=1 SV=2	1433F_HUMAN	0	2	1	1	0	1	2	2	2	0	0	1	6	1	1	2		Q15181	1		Q15181	1
1	Q14767	LTBP2_HUMAN	Latent-transforming growth factor beta-binding protein 2 OS=Homo sapiens GN=LTBP2 PE=1 SV=3	UBTD2_HUMAN	0	0	0	4	0	0	11	9	15	0	1	0	36	1	1	2		Q14767	1		Q14767	1
1	Q9NR99	MXRA5_HUMAN	Matrix-remodeling-associated protein 5 OS=Homo sapiens GN=MXRA5 PE=2 SV=3	TAOK2_HUMAN	0	4	0	3	0	0	2	1	5	1	0	0	9	1	1	2		Q9NR99	1		Q9NR99	1
1	P22105	TENX_HUMAN	Tenascin-X OS=Homo sapiens GN=TNXB PE=1 SV=3	GPX4_HUMAN	0	0	1	5	0	0	1	3	7	0	4	0	15	1	1	2		P22105	1		P22105	1
1	P02675	FIBB_HUMAN	Fibrinogen beta chain OS=Homo sapiens GN=FGB PE=1 SV=2	S10AG_HUMAN	0	4	0	0	0	0	0	7	4	2	0	0	13	1	1	2		P02675	1		P02675	1
1	Q9NRX4	PHP14_HUMAN	14 kDa phosphohistidine phosphatase OS=Homo sapiens GN=PHPT1 PE=1 SV=1	EXOC4_HUMAN	1	1	2	1	0	1	3	2	7	1	1	1	14	1	1	2		Q9NRX4	1		Q9NRX4	1
1	P30613	KPYR_HUMAN	Pyruvate kinase PKLR OS=Homo sapiens GN=PKLR PE=1 SV=2	PDE8A_HUMAN	0	2	0	3	0	0	2	2	0	0	0	0	4	1	1	2		P30613	1		P30613	1
1	P01031	CO5_HUMAN	Complement C5 OS=Homo sapiens GN=C5 PE=1 SV=4	VATH_HUMAN	0	3	0	3	0	0	0	1	3	6	0	0	10	1	1	2		P01031	1		P01031	1
1	P22528	SPR1B_HUMAN	Cornifin-B OS=Homo sapiens GN=SPRR1B PE=1 SV=2	VPS25_HUMAN	0	2	3	3	0	0	0	3	0	0	0	0	3	1	1	2		P22528	1		P22528	1
1	Q15365	PCBP1_HUMAN	Poly(rC)-binding protein 1 OS=Homo sapiens GN=PCBP1 PE=1 SV=2	TBCA_HUMAN	0	3	5	1	0	5	1	1	2	1	0	5	5	1	1	2		Q15365	1		Q15365	1
1	P32004	L1CAM_HUMAN	Neural cell adhesion molecule L1 OS=Homo sapiens GN=L1CAM PE=1 SV=2	VATD_HUMAN	0	3	0	6	0	0	0	2	5	0	0	0	7	1	1	2		P32004	1		P32004	1
1	P07602	SAP_HUMAN	Prosaposin OS=Homo sapiens GN=PSAP PE=1 SV=2	PACN2_HUMAN	7	10	0	1	0	7	0	0	0	11	0	7	11	1	1	2		P07602	1		P07602	1
1	O75936	BODG_HUMAN	Gamma-butyrobetaine dioxygenase OS=Homo sapiens GN=BBOX1 PE=1 SV=1	C2D1A_HUMAN	0	10	0	2	1	0	2	0	0	4	1	1	7	1	1	2		O75936	1		O75936	1
1	Q02383	SEMG2_HUMAN	Semenogelin-2 OS=Homo sapiens GN=SEMG2 PE=1 SV=1	CD9_HUMAN	2	0	0	0	0	30	0	5	0	0	87	30	92	1	1	2		Q02383	1		Q02383	1
1	P49221	TGM4_HUMAN	Protein-glutamine gamma-glutamyltransferase 4 OS=Homo sapiens GN=TGM4 PE=1 SV=2	ATRAP_HUMAN	0	0	0	0	0	32	10	0	2	10	0	32	22	1	1	2		P49221	1		P49221	1
1	Q9GZM7	TINAL_HUMAN	Tubulointerstitial nephritis antigen-like OS=Homo sapiens GN=TINAGL1 PE=1 SV=1	TSN1_HUMAN	0	3	1	3	0	0	2	1	4	0	1	0	8	1	1	2		Q9GZM7	1		Q9GZM7	1
1	P48745	NOV_HUMAN	Protein NOV homolog OS=Homo sapiens GN=NOV PE=1 SV=1	PSN1_HUMAN	0	1	1	2	0	0	2	1	2	0	2	0	7	1	1	2		P48745	1		P48745	1
1	P60022	DEFB1_HUMAN	Beta-defensin 1 OS=Homo sapiens GN=DEFB1 PE=1 SV=1	NPT2A_HUMAN	0	4	0	5	0	1	2	1	4	0	0	1	7	1	1	2		P60022	1		P60022	1
1	P55072	TERA_HUMAN	Transitional endoplasmic reticulum ATPase OS=Homo sapiens GN=VCP PE=1 SV=4	PROF1_HUMAN	0	7	1	0	0	4	0	0	2	4	0	4	6	1	1	2		P55072	1		P55072	1
1	Q9Y653	GPR56_HUMAN	G-protein coupled receptor 56 OS=Homo sapiens GN=GPR56 PE=1 SV=2	VAMP8_HUMAN	0	4	0	3	0	0	3	0	2	0	0	0	5	1	1	2		Q9Y653	1		Q9Y653	1
1	P04156	PRIO_HUMAN	Major prion protein OS=Homo sapiens GN=PRNP PE=1 SV=1	S28A1_HUMAN	0	0	2	1	0	0	2	1	2	0	3	0	8	1	1	2		P04156	1		P04156	1
1	P16070	CD44_HUMAN	CD44 antigen OS=Homo sapiens GN=CD44 PE=1 SV=3	P2RX4_HUMAN	3	0	1	1	0	2	2	0	0	0	6	2	8	1	1	2		P16070	1		P16070	1
1	Q86T13	CLC14_HUMAN	C-type lectin domain family 14 member A OS=Homo sapiens GN=CLEC14A PE=1 SV=1	KV302_HUMAN	0	0	1	4	0	0	2	3	3	0	1	0	9	1	1	2		Q86T13	1		Q86T13	1
1	P04745	AMY1_HUMAN	Alpha-amylase 1 OS=Homo sapiens GN=AMY1A PE=1 SV=2	CO9_HUMAN	0	0	0	28	0	11	0	29	15	0	0	11	44	1	1	2		P04745	1		P04745	1
1	P04196	HRG_HUMAN	Histidine-rich glycoprotein OS=Homo sapiens GN=HRG PE=1 SV=1	TRY3_HUMAN	0	8	0	0	4	0	1	3	3	10	0	4	17	1	1	2		P04196	1		P04196	1
1	O14786	NRP1_HUMAN	Neuropilin-1 OS=Homo sapiens GN=NRP1 PE=1 SV=3	ADAM9_HUMAN	0	4	0	2	0	0	1	2	2	0	0	0	5	1	1	2		O14786	1		O14786	1
1	P08962	CD63_HUMAN	CD63 antigen OS=Homo sapiens GN=CD63 PE=1 SV=2	SC5AA_HUMAN	5	2	0	0	0	10	0	0	0	9	0	10	9	1	1	2		P08962	1		P08962	1
1	P21266	GSTM3_HUMAN	Glutathione S-transferase Mu 3 OS=Homo sapiens GN=GSTM3 PE=1 SV=3	ALDOC_HUMAN	0	10	3	0	0	6	1	0	0	3	0	6	4	1	1	2		P21266	1		P21266	1
1	Q9UBV8	PEF1_HUMAN	Peflin OS=Homo sapiens GN=PEF1 PE=1 SV=1	RFIP1_HUMAN	2	3	0	0	0	5	0	0	0	5	0	5	5	1	1	2		Q9UBV8	1		Q9UBV8	1
1	P13489	RINI_HUMAN	Ribonuclease inhibitor OS=Homo sapiens GN=RNH1 PE=1 SV=2	CCNY_HUMAN	0	7	2	1	0	7	1	0	1	5	1	7	8	1	1	2		P13489	1		P13489	1
1	P32119	PRDX2_HUMAN	Peroxiredoxin-2 OS=Homo sapiens GN=PRDX2 PE=1 SV=5	COMT_HUMAN	2	5	0	0	0	6	0	0	0	7	0	6	7	1	1	2		P32119	1		P32119	1
1	Q9Y2S2	CRYL1_HUMAN	Lambda-crystallin homolog OS=Homo sapiens GN=CRYL1 PE=1 SV=3	CO7_HUMAN	2	12	0	0	0	4	0	0	0	5	0	4	5	1	1	2		Q9Y2S2	1		Q9Y2S2	1
1	P62805	H4_HUMAN	Histone H4 OS=Homo sapiens GN=HIST1H4A PE=1 SV=2	PDZ1I_HUMAN	3	14	0	0	0	2	0	0	0	5	0	2	5	1	1	2		P62805	1		P62805	1
1	O75487	GPC4_HUMAN	Glypican-4 OS=Homo sapiens GN=GPC4 PE=1 SV=4	RHOB_HUMAN	0	8	0	2	0	0	2	2	1	0	0	0	5	1	1	2		O75487	1		O75487	1
1	Q8IUL8	CILP2_HUMAN	Cartilage intermediate layer protein 2 OS=Homo sapiens GN=CILP2 PE=2 SV=2	RAB23_HUMAN	0	5	2	9	0	0	1	3	1	0	0	0	5	1	1	2		Q8IUL8	1		Q8IUL8	1
1	P01619	KV301_HUMAN	Ig kappa chain V-III region B6 OS=Homo sapiens PE=1 SV=1	RAB12_HUMAN	1	0	0	3	0	0	4	7	0	7	0	0	18	1	1	2		P01619	1		P01619	1
1	Q9H6X2	ANTR1_HUMAN	Anthrax toxin receptor 1 OS=Homo sapiens GN=ANTXR1 PE=1 SV=2	DPP2_HUMAN	0	0	0	2	0	0	2	2	2	0	0	0	6	1	1	2		Q9H6X2	1		Q9H6X2	1
1	O60437	PEPL_HUMAN	Periplakin OS=Homo sapiens GN=PPL PE=1 SV=4	LV403_HUMAN	0	3	3	1	1	0	1	1	0	2	1	1	5	1	1	2		O60437	1		O60437	1
1	P62158	CALM_HUMAN	Calmodulin OS=Homo sapiens GN=CALM1 PE=1 SV=2	HNMT_HUMAN	2	0	0	0	0	4	0	1	0	3	0	4	4	1	1	2		P62158	1		P62158	1
1	Q14117	DPYS_HUMAN	Dihydropyrimidinase OS=Homo sapiens GN=DPYS PE=1 SV=1	F16P1_HUMAN	0	7	0	5	0	0	1	1	1	3	1	0	7	1	1	2		Q14117	1		Q14117	1
1	P20339	RAB5A_HUMAN	Ras-related protein Rab-5A OS=Homo sapiens GN=RAB5A PE=1 SV=2	UBTD1_HUMAN	2	0	0	0	0	3	0	0	0	4	0	3	4	1	1	2		P20339	1		P20339	1
1	Q8TAD7	OCC1_HUMAN	Overexpressed in colon carcinoma 1 protein OS=Homo sapiens GN=OCC1 PE=1 SV=2	SEM5A_HUMAN	2	1	0	1	0	2	4	0	0	0	1	2	5	1	1	2		Q8TAD7	1		Q8TAD7	1
1	Q9HBG4	VPP4_HUMAN	V-type proton ATPase 116 kDa subunit a isoform 4 OS=Homo sapiens GN=ATP6V0A4 PE=1 SV=2	UBA1_HUMAN	0	0	1	0	0	5	1	0	2	3	1	5	7	1	1	2		Q9HBG4	1		Q9HBG4	1
1	Q12923	PTN13_HUMAN	Tyrosine-protein phosphatase non-receptor type 13 OS=Homo sapiens GN=PTPN13 PE=1 SV=2	TM55B_HUMAN	0	0	0	0	0	3	2	2	1	0	0	3	5	1	1	2		Q12923	1		Q12923	1
1	Q03154	ACY1_HUMAN	Aminoacylase-1 OS=Homo sapiens GN=ACY1 PE=1 SV=1	TTYH3_HUMAN	0	31	1	3	0	1	1	0	1	7	0	1	9	1	1	2		Q03154	1		Q03154	1
1	O95630	STABP_HUMAN	STAM-binding protein OS=Homo sapiens GN=STAMBP PE=1 SV=1	ACBP_HUMAN	0	0	0	0	0	2	4	2	1	0	1	2	8	1	1	2		O95630	1		O95630	1
1	P50148	GNAQ_HUMAN	Guanine nucleotide-binding protein G(q) subunit alpha OS=Homo sapiens GN=GNAQ PE=1 SV=4	AK1A1_HUMAN	0	0	0	2	0	6	1	0	1	4	1	6	7	1	1	2		P50148	1		P50148	1
1	Q9NQR4	NIT2_HUMAN	Omega-amidase NIT2 OS=Homo sapiens GN=NIT2 PE=1 SV=1	VATB1_HUMAN	0	7	0	2	0	0	1	1	0	3	0	0	5	1	1	2		Q9NQR4	1		Q9NQR4	1
1	Q14914	PTGR1_HUMAN	Prostaglandin reductase 1 OS=Homo sapiens GN=PTGR1 PE=1 SV=2	SMIM1_HUMAN	0	1	0	2	0	0	1	2	0	7	1	0	11	1	1	2		Q14914	1		Q14914	1
1	Q07837	SLC31_HUMAN	Neutral and basic amino acid transport protein rBAT OS=Homo sapiens GN=SLC3A1 PE=1 SV=2	ABCB6_HUMAN	1	1	0	0	0	2	3	1	0	7	1	2	12	1	1	2		Q07837	1		Q07837	1
1	Q9BY43	CHM4A_HUMAN	Charged multivesicular body protein 4a OS=Homo sapiens GN=CHMP4A PE=1 SV=3	GAS6_HUMAN	2	0	0	0	0	1	0	1	0	2	2	1	5	1	1	2		Q9BY43	1		Q9BY43	1
1	P10599	THIO_HUMAN	Thioredoxin OS=Homo sapiens GN=TXN PE=1 SV=3	GGCT_HUMAN	3	1	0	0	0	3	1	0	0	4	0	3	5	1	1	2		P10599	1		P10599	1
1	P78324	SHPS1_HUMAN	Tyrosine-protein phosphatase non-receptor type substrate 1 OS=Homo sapiens GN=SIRPA PE=1 SV=2	CIB1_HUMAN	2	0	0	0	0	2	1	0	1	0	2	2	4	1	1	2		P78324	1		P78324	1
1	P61088	UBE2N_HUMAN	Ubiquitin-conjugating enzyme E2 N OS=Homo sapiens GN=UBE2N PE=1 SV=1	ANGT_HUMAN	1	0	1	0	0	3	1	2	1	0	2	3	6	1	1	2		P61088	1		P61088	1
1	Q04917	1433F_HUMAN	14-3-3 protein eta OS=Homo sapiens GN=YWHAH PE=1 SV=4	CYFP2_HUMAN	0	0	0	0	0	5	3	0	0	8	0	5	11	1	1	2		Q04917	1		Q04917	1
1	Q96FQ6	S10AG_HUMAN	Protein S100-A16 OS=Homo sapiens GN=S100A16 PE=1 SV=1	FLOT2_HUMAN	1	1	1	1	4	2	2	3	1	1	1	6	8	1	1	2		Q96FQ6	1		Q96FQ6	1
1	O60635	TSN1_HUMAN	Tetraspanin-1 OS=Homo sapiens GN=TSPAN1 PE=1 SV=2	KCTD3_HUMAN	0	3	0	0	0	4	0	0	0	14	0	4	14	1	1	2		O60635	1		O60635	1
1	P01717	LV403_HUMAN	Ig lambda chain V-IV region Hil OS=Homo sapiens PE=1 SV=1	SH3L3_HUMAN	0	0	0	2	0	0	1	2	4	1	1	0	9	1	1	2		P01717	1		P01717	1
1	P14550	AK1A1_HUMAN	Alcohol dehydrogenase [NADP(+)] OS=Homo sapiens GN=AKR1A1 PE=1 SV=3	BGAL_HUMAN	0	18	0	1	0	7	0	1	0	8	0	7	9	1	1	2		P14550	1		P14550	1
1	Q14254	FLOT2_HUMAN	Flotillin-2 OS=Homo sapiens GN=FLOT2 PE=1 SV=2	LDHA_HUMAN	0	0	0	0	3	2	1	2	0	12	0	5	15	1	1	2		Q14254	1		Q14254	1
1	P34896	GLYC_HUMAN	Serine hydroxymethyltransferase, cytosolic OS=Homo sapiens GN=SHMT1 PE=1 SV=1	DHSO_HUMAN	0	12	0	2	0	0	0	0	0	10	1	0	11	1	1	2		P34896	1		P34896	1
1	Q14344	GNA13_HUMAN	Guanine nucleotide-binding protein subunit alpha-13 OS=Homo sapiens GN=GNA13 PE=1 SV=2	DMBT1_HUMAN	0	0	0	2	0	5	2	0	0	0	0	5	2	1	1	2		Q14344	1		Q14344	1
1	O00764	PDXK_HUMAN	Pyridoxal kinase OS=Homo sapiens GN=PDXK PE=1 SV=1	MA1A1_HUMAN	0	5	0	0	1	2	0	0	0	2	0	3	2	1	1	2		O00764	1		O00764	1
1	P59665	DEF1_HUMAN	Neutrophil defensin 1 OS=Homo sapiens GN=DEFA1 PE=1 SV=1	PLS4_HUMAN	1	1	2	1	0	1	4	1	3	1	0	1	9	1	1	2		P59665	1		P59665	1
1	Q6NXT2	H3C_HUMAN	Histone H3.3C OS=Homo sapiens GN=H3F3C PE=1 SV=3	CD151_HUMAN	2	2	1	1	0	1	1	2	1	0	1	1	5	1	1	2		Q6NXT2	1		Q6NXT2	1
1	P04155	TFF1_HUMAN	Trefoil factor 1 OS=Homo sapiens GN=TFF1 PE=1 SV=1	PDDC1_HUMAN	1	0	2	1	0	2	0	0	1	0	3	2	4	1	1	2		P04155	1		P04155	1
1	Q9UBD6	RHCG_HUMAN	Ammonium transporter Rh type C OS=Homo sapiens GN=RHCG PE=1 SV=1	UBP5_HUMAN	0	2	0	1	0	0	1	0	3	3	1	0	8	1	1	2		Q9UBD6	1		Q9UBD6	1
1	P62330	ARF6_HUMAN	ADP-ribosylation factor 6 OS=Homo sapiens GN=ARF6 PE=1 SV=2	MUC4_HUMAN	2	0	0	0	0	2	0	0	0	5	0	2	5	1	1	2		P62330	1		P62330	1
1	Q96IU4	ABHEB_HUMAN	Alpha/beta hydrolase domain-containing protein 14B OS=Homo sapiens GN=ABHD14B PE=1 SV=1	DYN2_HUMAN	0	8	0	1	0	5	1	3	0	1	0	5	5	1	1	2		Q96IU4	1		Q96IU4	1
1	P30043	BLVRB_HUMAN	Flavin reductase (NADPH) OS=Homo sapiens GN=BLVRB PE=1 SV=3	VATL_HUMAN	0	3	0	0	0	3	0	0	0	2	1	3	3	1	1	2		P30043	1		P30043	1
1	P05109	S10A8_HUMAN	Protein S100-A8 OS=Homo sapiens GN=S100A8 PE=1 SV=1	LIME1_HUMAN	0	19	1	1	0	0	0	4	0	4	0	0	8	1	1	2		P05109	1		P05109	1
1	P61019	RAB2A_HUMAN	Ras-related protein Rab-2A OS=Homo sapiens GN=RAB2A PE=1 SV=1	VPS29_HUMAN	0	2	0	0	0	4	0	0	0	2	0	4	2	1	1	2		P61019	1		P61019	1
1	Q9BYF1	ACE2_HUMAN	Angiotensin-converting enzyme 2 OS=Homo sapiens GN=ACE2 PE=1 SV=2	EMAL2_HUMAN	0	3	0	0	0	0	2	1	1	17	0	0	21	1	1	2		Q9BYF1	1		Q9BYF1	1
1	Q9H8L6	MMRN2_HUMAN	Multimerin-2 OS=Homo sapiens GN=MMRN2 PE=1 SV=2	FBLN5_HUMAN	0	9	1	2	2	0	1	2	1	0	1	2	5	1	1	2		Q9H8L6	1		Q9H8L6	1
1	P21810	PGS1_HUMAN	Biglycan OS=Homo sapiens GN=BGN PE=1 SV=2	ASAH1_HUMAN	0	12	2	1	2	0	1	0	1	2	0	2	4	1	1	2		P21810	1		P21810	1
1	Q09666	AHNK_HUMAN	Neuroblast differentiation-associated protein AHNAK OS=Homo sapiens GN=AHNAK PE=1 SV=2	TMC4_HUMAN	0	0	0	0	0	4	1	6	0	2	0	4	9	1	1	2		Q09666	1		Q09666	1
1	P59998	ARPC4_HUMAN	Actin-related protein 2/3 complex subunit 4 OS=Homo sapiens GN=ARPC4 PE=1 SV=3	F151A_HUMAN	0	3	0	1	0	2	0	0	0	2	0	2	2	1	1	2		P59998	1		P59998	1
1	P09211	GSTP1_HUMAN	Glutathione S-transferase P OS=Homo sapiens GN=GSTP1 PE=1 SV=2	MFSD8_HUMAN	0	8	0	0	0	5	0	0	0	4	0	5	4	1	1	2		P09211	1		P09211	1
1	P13866	SC5A1_HUMAN	Sodium/glucose cotransporter 1 OS=Homo sapiens GN=SLC5A1 PE=1 SV=1	PPAL_HUMAN	0	0	0	1	1	2	2	1	0	12	0	3	15	1	1	2		P13866	1		P13866	1
1	P00738	HPT_HUMAN	Haptoglobin OS=Homo sapiens GN=HP PE=1 SV=1	DNJC5_HUMAN	0	5	0	7	0	0	5	0	0	0	0	0	5	1	1	2		P00738	1		P00738	1
1	P48594	SPB4_HUMAN	Serpin B4 OS=Homo sapiens GN=SERPINB4 PE=1 SV=2	HN1L_HUMAN	0	51	0	2	0	0	0	7	0	0	0	0	7	1	1	2		P48594	1		P48594	1
1	P06744	G6PI_HUMAN	Glucose-6-phosphate isomerase OS=Homo sapiens GN=GPI PE=1 SV=4	SERC5_HUMAN	0	10	0	0	0	2	0	0	1	6	0	2	7	1	1	2		P06744	1		P06744	1
1	P20930	FILA_HUMAN	Filaggrin OS=Homo sapiens GN=FLG PE=1 SV=3	KAP2_HUMAN	0	75	0	45	0	0	0	120	0	0	0	0	120	1	1	2		P20930	1		P20930	1
1	P04259	K2C6B_HUMAN	Keratin, type II cytoskeletal 6B OS=Homo sapiens GN=KRT6B PE=1 SV=5	GPM6A_HUMAN	0	0	2	0	0	0	0	4	0	0	3	0	7	1	1	2		P04259	1		P04259	1
1	P19827	ITIH1_HUMAN	Inter-alpha-trypsin inhibitor heavy chain H1 OS=Homo sapiens GN=ITIH1 PE=1 SV=3	SVIP_HUMAN	0	6	0	0	1	0	0	3	1	2	0	1	6	1	1	2		P19827	1		P19827	1
1	P13647	K2C5_HUMAN	Keratin, type II cytoskeletal 5 OS=Homo sapiens GN=KRT5 PE=1 SV=3	UK114_HUMAN	12	0	0	0	0	2	0	0	0	0	2	2	2	1	1	2		P13647	1		P13647	1
1	P0DJD8	PEPA3_HUMAN	Pepsin A-3 OS=Homo sapiens GN=PGA3 PE=1 SV=1	PPGB_HUMAN	0	1	0	2	0	4	1	0	1	1	2	4	5	1	1	2		P0DJD8	1		P0DJD8	1
1	P19823	ITIH2_HUMAN	Inter-alpha-trypsin inhibitor heavy chain H2 OS=Homo sapiens GN=ITIH2 PE=1 SV=2	ZO2_HUMAN	0	5	1	0	0	0	0	2	0	5	0	0	7	1	1	2		P19823	1		P19823	1
1	Q13822	ENPP2_HUMAN	Ectonucleotide pyrophosphatase/phosphodiesterase family member 2 OS=Homo sapiens GN=ENPP2 PE=1 SV=3	MYCT_HUMAN	0	7	0	6	0	0	0	2	0	0	0	0	2	1	1	2		Q13822	1		Q13822	1
1	P03951	FA11_HUMAN	Coagulation factor XI OS=Homo sapiens GN=F11 PE=1 SV=1	TACD2_HUMAN	0	20	0	4	0	0	1	1	7	0	0	0	9	1	1	2		P03951	1		P03951	1
1	P02679	FIBG_HUMAN	Fibrinogen gamma chain OS=Homo sapiens GN=FGG PE=1 SV=3	PLS1_HUMAN	0	2	0	1	2	0	0	5	4	0	0	2	9	1	1	2		P02679	1		P02679	1
1	P35321	SPR1A_HUMAN	Cornifin-A OS=Homo sapiens GN=SPRR1A PE=1 SV=2	HINT3_HUMAN	0	1	2	2	0	0	0	2	0	0	0	0	2	1	1	2		P35321	1		P35321	1
1	Q86TH1	ATL2_HUMAN	ADAMTS-like protein 2 OS=Homo sapiens GN=ADAMTSL2 PE=1 SV=1	GLYC_HUMAN	0	10	0	7	0	0	1	0	7	0	0	0	8	1	1	2		Q86TH1	1		Q86TH1	1
1	Q9P0W8	SPAT7_HUMAN	Spermatogenesis-associated protein 7 OS=Homo sapiens GN=SPATA7 PE=2 SV=3	RAI3_HUMAN	0	0	0	2	2	2	2	0	0	0	0	4	2	1	1	2		Q9P0W8	1		Q9P0W8	1
1	P01597	KV105_HUMAN	Ig kappa chain V-I region DEE OS=Homo sapiens PE=1 SV=1	TES_HUMAN	0	0	0	0	0	5	0	5	2	0	1	5	8	1	1	2		P01597	1		P01597	1
1	Q12794	HYAL1_HUMAN	Hyaluronidase-1 OS=Homo sapiens GN=HYAL1 PE=1 SV=2	AK1C1_HUMAN	0	5	0	4	0	0	0	2	0	0	0	0	2	1	1	2		Q12794	1		Q12794	1
1	P78380	OLR1_HUMAN	Oxidized low-density lipoprotein receptor 1 OS=Homo sapiens GN=OLR1 PE=1 SV=1	AB17C_HUMAN	0	3	0	5	0	0	1	0	3	0	0	0	4	1	1	2		P78380	1		P78380	1
1	P39060	COIA1_HUMAN	Collagen alpha-1(XVIII) chain OS=Homo sapiens GN=COL18A1 PE=1 SV=5	DP13A_HUMAN	0	10	0	1	0	0	1	1	2	2	0	0	6	1	1	2		P39060	1		P39060	1
1	Q16610	ECM1_HUMAN	Extracellular matrix protein 1 OS=Homo sapiens GN=ECM1 PE=1 SV=2	SPB3_HUMAN	0	13	0	4	0	0	0	6	1	0	0	0	7	1	1	2		Q16610	1		Q16610	1
1	P15289	ARSA_HUMAN	Arylsulfatase A OS=Homo sapiens GN=ARSA PE=1 SV=3	DDX3X_HUMAN	0	6	0	2	0	0	1	3	0	1	0	0	5	1	1	2		P15289	1		P15289	1
1	P00746	CFAD_HUMAN	Complement factor D OS=Homo sapiens GN=CFD PE=1 SV=5	SC5A8_HUMAN	0	0	0	2	2	0	0	2	4	0	0	2	6	1	1	2		P00746	1		P00746	1
1	P19021	AMD_HUMAN	Peptidyl-glycine alpha-amidating monooxygenase OS=Homo sapiens GN=PAM PE=1 SV=2	SDC4_HUMAN	0	2	0	2	0	0	1	0	2	0	0	0	3	1	1	2		P19021	1		P19021	1
1	P25325	THTM_HUMAN	3-mercaptopyruvate sulfurtransferase OS=Homo sapiens GN=MPST PE=1 SV=3	TSN18_HUMAN	0	4	0	0	0	0	2	1	2	0	0	0	5	1	1	2		P25325	1		P25325	1
1	Q09328	MGT5A_HUMAN	Alpha-1,6-mannosylglycoprotein 6-beta-N-acetylglucosaminyltransferase A OS=Homo sapiens GN=MGAT5 PE=1 SV=1	PPBT_HUMAN	0	6	0	4	0	0	0	0	2	0	0	0	2	1	1	2		Q09328	1		Q09328	1
1	P23470	PTPRG_HUMAN	Receptor-type tyrosine-protein phosphatase gamma OS=Homo sapiens GN=PTPRG PE=1 SV=4	UBXN6_HUMAN	0	4	0	2	0	0	0	2	0	0	0	0	2	1	1	2		P23470	1		P23470	1
1	P56537	IF6_HUMAN	Eukaryotic translation initiation factor 6 OS=Homo sapiens GN=EIF6 PE=1 SV=1	MBP_HUMAN	0	3	0	2	0	0	0	2	1	0	0	0	3	1	1	2		P56537	1		P56537	1
1	O75340	PDCD6_HUMAN	Programmed cell death protein 6 OS=Homo sapiens GN=PDCD6 PE=1 SV=1	RNF34_HUMAN	0	2	0	0	0	5	1	0	1	11	0	5	13	1	1	2		O75340	1		O75340	1
1	Q02413	DSG1_HUMAN	Desmoglein-1 OS=Homo sapiens GN=DSG1 PE=1 SV=2	GNA13_HUMAN	0	2	0	0	0	0	0	2	0	4	0	0	6	1	1	2		Q02413	1		Q02413	1
1	Q9UPZ6	THS7A_HUMAN	Thrombospondin type-1 domain-containing protein 7A OS=Homo sapiens GN=THSD7A PE=1 SV=4	ARL6_HUMAN	0	2	0	3	0	0	0	0	5	0	0	0	5	1	1	2		Q9UPZ6	1		Q9UPZ6	1
1	Q9UKR3	KLK13_HUMAN	Kallikrein-13 OS=Homo sapiens GN=KLK13 PE=1 SV=1	S10A6_HUMAN	0	8	0	2	0	0	0	3	0	0	0	0	3	1	1	2		Q9UKR3	1		Q9UKR3	1
1	P06702	S10A9_HUMAN	Protein S100-A9 OS=Homo sapiens GN=S100A9 PE=1 SV=1	DDAH2_HUMAN	1	56	0	0	0	0	0	6	0	6	0	0	12	1	1	2		P06702	1		P06702	1
1	P03973	SLPI_HUMAN	Antileukoproteinase OS=Homo sapiens GN=SLPI PE=1 SV=2	PDXK_HUMAN	0	0	0	4	0	0	1	2	3	0	1	0	7	1	1	2		P03973	1		P03973	1
1	Q9NQ38	ISK5_HUMAN	Serine protease inhibitor Kazal-type 5 OS=Homo sapiens GN=SPINK5 PE=1 SV=2	LIPL_HUMAN	0	4	0	8	0	0	0	9	0	0	0	0	9	1	1	2		Q9NQ38	1		Q9NQ38	1
1	P01609	KV117_HUMAN	Ig kappa chain V-I region Scw OS=Homo sapiens PE=1 SV=1	PUR9_HUMAN	0	7	0	0	0	6	0	0	0	10	0	6	10	1	1	2		P01609	1		P01609	1
1	P68871	HBB_HUMAN	Hemoglobin subunit beta OS=Homo sapiens GN=HBB PE=1 SV=2	CAH4_HUMAN	0	25	0	0	0	9	0	0	0	20	0	9	20	1	1	2		P68871	1		P68871	1
1	P18669	PGAM1_HUMAN	Phosphoglycerate mutase 1 OS=Homo sapiens GN=PGAM1 PE=1 SV=2	K2C8_HUMAN	0	6	0	1	0	4	0	0	0	5	0	4	5	1	1	2		P18669	1		P18669	1
1	P23526	SAHH_HUMAN	Adenosylhomocysteinase OS=Homo sapiens GN=AHCY PE=1 SV=4	SPIT2_HUMAN	0	18	1	1	0	8	0	0	0	2	0	8	2	1	1	2		P23526	1		P23526	1
1	O43488	ARK72_HUMAN	Aflatoxin B1 aldehyde reductase member 2 OS=Homo sapiens GN=AKR7A2 PE=1 SV=3	MYOF_HUMAN	0	2	0	0	0	3	0	0	0	2	0	3	2	1	1	2		O43488	1		O43488	1
1	P06727	APOA4_HUMAN	Apolipoprotein A-IV OS=Homo sapiens GN=APOA4 PE=1 SV=3	DEF1_HUMAN	0	11	0	0	0	3	0	0	0	5	0	3	5	1	1	2		P06727	1		P06727	1
1	P04632	CPNS1_HUMAN	Calpain small subunit 1 OS=Homo sapiens GN=CAPNS1 PE=1 SV=1	P3IP1_HUMAN	0	3	0	0	3	5	0	0	0	2	0	8	2	1	1	2		P04632	1		P04632	1
1	Q96DG6	CMBL_HUMAN	Carboxymethylenebutenolidase homolog OS=Homo sapiens GN=CMBL PE=1 SV=1	RAB5B_HUMAN	0	12	0	0	0	4	0	0	0	5	0	4	5	1	1	2		Q96DG6	1		Q96DG6	1
1	P02647	APOA1_HUMAN	Apolipoprotein A-I OS=Homo sapiens GN=APOA1 PE=1 SV=1	CRKL_HUMAN	0	15	0	0	0	2	0	0	0	15	0	2	15	1	1	2		P02647	1		P02647	1
1	P17858	PFKAL_HUMAN	ATP-dependent 6-phosphofructokinase, liver type OS=Homo sapiens GN=PFKL PE=1 SV=6	H3C_HUMAN	0	3	0	0	0	3	0	0	0	4	0	3	4	1	1	2		P17858	1		P17858	1
1	O43280	TREA_HUMAN	Trehalase OS=Homo sapiens GN=TREH PE=1 SV=2	NPNT_HUMAN	0	2	0	0	0	2	0	0	0	2	0	2	2	1	1	2		O43280	1		O43280	1
1	P00915	CAH1_HUMAN	Carbonic anhydrase 1 OS=Homo sapiens GN=CA1 PE=1 SV=2	LASP1_HUMAN	0	3	0	2	0	1	0	2	0	0	0	1	2	1	1	2		P00915	1		P00915	1
1	P02511	CRYAB_HUMAN	Alpha-crystallin B chain OS=Homo sapiens GN=CRYAB PE=1 SV=2	NDRG1_HUMAN	0	6	0	0	0	1	0	0	2	4	0	1	6	1	1	2		P02511	1		P02511	1
1	P08263	GSTA1_HUMAN	Glutathione S-transferase A1 OS=Homo sapiens GN=GSTA1 PE=1 SV=3	FCGBP_HUMAN	0	14	0	0	0	2	0	0	0	9	0	2	9	1	1	2		P08263	1		P08263	1
1	P15586	GNS_HUMAN	N-acetylglucosamine-6-sulfatase OS=Homo sapiens GN=GNS PE=1 SV=3	PGM1_HUMAN	0	2	0	1	0	1	2	0	0	2	0	1	4	1	1	2		P15586	1		P15586	1
1	P01008	ANT3_HUMAN	Antithrombin-III OS=Homo sapiens GN=SERPINC1 PE=1 SV=1	DPP3_HUMAN	0	13	0	3	0	0	0	0	0	8	0	0	8	1	1	2		P01008	1		P01008	1
1	P08123	CO1A2_HUMAN	Collagen alpha-2(I) chain OS=Homo sapiens GN=COL1A2 PE=1 SV=7	BICR2_HUMAN	0	6	0	9	0	0	0	0	4	0	0	0	4	1	1	2		P08123	1		P08123	1
1	Q9Y646	CBPQ_HUMAN	Carboxypeptidase Q OS=Homo sapiens GN=CPQ PE=1 SV=1	ADIRF_HUMAN	0	4	0	0	0	0	0	1	1	5	2	0	9	1	1	2		Q9Y646	1		Q9Y646	1
1	Q12860	CNTN1_HUMAN	Contactin-1 OS=Homo sapiens GN=CNTN1 PE=1 SV=1	CRK_HUMAN	0	6	1	15	0	0	0	0	4	0	0	0	4	1	1	2		Q12860	1		Q12860	1
1	P01767	HV306_HUMAN	Ig heavy chain V-III region BUT OS=Homo sapiens PE=1 SV=1	TFF1_HUMAN	0	3	0	0	2	0	0	2	0	4	0	2	6	1	1	2		P01767	1		P01767	1
1	P17936	IBP3_HUMAN	Insulin-like growth factor-binding protein 3 OS=Homo sapiens GN=IGFBP3 PE=1 SV=2	AL9A1_HUMAN	0	4	0	3	0	0	0	0	2	0	0	0	2	1	1	2		P17936	1		P17936	1
1	Q9Y376	CAB39_HUMAN	Calcium-binding protein 39 OS=Homo sapiens GN=CAB39 PE=1 SV=1	ARF5_HUMAN	3	4	0	0	0	0	0	0	0	6	0	0	6	1	1	2		Q9Y376	1		Q9Y376	1
1	P01781	HV320_HUMAN	Ig heavy chain V-III region GAL OS=Homo sapiens PE=1 SV=1	SRC8_HUMAN	0	5	0	1	0	0	2	1	0	2	0	0	5	1	1	2		P01781	1		P01781	1
1	P22352	GPX3_HUMAN	Glutathione peroxidase 3 OS=Homo sapiens GN=GPX3 PE=1 SV=2	RHCG_HUMAN	0	3	0	2	0	0	0	0	0	3	0	0	3	1	1	2		P22352	1		P22352	1
1	P01768	HV307_HUMAN	Ig heavy chain V-III region CAM OS=Homo sapiens PE=1 SV=1	CDHR2_HUMAN	0	3	0	0	0	0	2	2	0	0	0	0	4	1	1	2		P01768	1		P01768	1
1	P27701	CD82_HUMAN	CD82 antigen OS=Homo sapiens GN=CD82 PE=1 SV=1	GDIA_HUMAN	1	2	2	0	0	0	0	0	0	4	0	0	4	1	1	2		P27701	1		P27701	1
1	Q8NBJ4	GOLM1_HUMAN	Golgi membrane protein 1 OS=Homo sapiens GN=GOLM1 PE=1 SV=1	SHAN2_HUMAN	0	0	3	2	0	0	1	0	1	0	2	0	4	1	1	2		Q8NBJ4	1		Q8NBJ4	1
1	P33176	KINH_HUMAN	Kinesin-1 heavy chain OS=Homo sapiens GN=KIF5B PE=1 SV=1	LHPP_HUMAN	0	0	0	0	0	5	0	3	0	0	0	5	3	1	1	2		P33176	1		P33176	1
1	Q13563	PKD2_HUMAN	Polycystin-2 OS=Homo sapiens GN=PKD2 PE=1 SV=3	RABP2_HUMAN	1	0	0	0	0	2	2	0	0	0	1	2	3	1	1	2		Q13563	1		Q13563	1
1	O94804	STK10_HUMAN	Serine/threonine-protein kinase 10 OS=Homo sapiens GN=STK10 PE=1 SV=1	DHR11_HUMAN	0	0	3	0	0	0	1	2	0	0	0	0	3	1	1	2		O94804	1		O94804	1
1	Q9Y2A7	NCKP1_HUMAN	Nck-associated protein 1 OS=Homo sapiens GN=NCKAP1 PE=1 SV=1	LEG9B_HUMAN	0	0	0	1	0	3	1	1	0	2	1	3	5	1	1	2		Q9Y2A7	1		Q9Y2A7	1
1	Q8N392	RHG18_HUMAN	Rho GTPase-activating protein 18 OS=Homo sapiens GN=ARHGAP18 PE=1 SV=3	LAIR1_HUMAN	0	0	1	2	0	1	1	0	1	1	4	1	7	1	1	2		Q8N392	1		Q8N392	1
1	O95398	RPGF3_HUMAN	Rap guanine nucleotide exchange factor 3 OS=Homo sapiens GN=RAPGEF3 PE=1 SV=6	MT1F_HUMAN	0	0	1	3	0	0	0	0	0	0	3	0	3	1	1	2		O95398	1		O95398	1
1	P15104	GLNA_HUMAN	Glutamine synthetase OS=Homo sapiens GN=GLUL PE=1 SV=4	TAGL2_HUMAN	0	5	0	0	0	0	0	3	0	0	0	0	3	1	1	2		P15104	1		P15104	1
1	P84095	RHOG_HUMAN	Rho-related GTP-binding protein RhoG OS=Homo sapiens GN=RHOG PE=1 SV=1	RAB21_HUMAN	0	0	0	0	0	4	0	0	0	5	0	4	5	1	1	2		P84095	1		P84095	1
1	P30044	PRDX5_HUMAN	Peroxiredoxin-5, mitochondrial OS=Homo sapiens GN=PRDX5 PE=1 SV=4	CLIC3_HUMAN	0	0	0	0	0	5	0	0	0	3	0	5	3	1	1	2		P30044	1		P30044	1
1	Q9BUT1	BDH2_HUMAN	3-hydroxybutyrate dehydrogenase type 2 OS=Homo sapiens GN=BDH2 PE=1 SV=2	MK01_HUMAN	0	5	0	1	0	1	0	0	0	2	0	1	2	1	1	2		Q9BUT1	1		Q9BUT1	1
1	O75083	WDR1_HUMAN	WD repeat-containing protein 1 OS=Homo sapiens GN=WDR1 PE=1 SV=4	ITB3_HUMAN	0	2	0	1	0	1	0	1	1	2	0	1	4	1	1	2		O75083	1		O75083	1
1	P06756	ITAV_HUMAN	Integrin alpha-V OS=Homo sapiens GN=ITGAV PE=1 SV=2	HSP74_HUMAN	0	0	0	0	0	2	1	2	0	1	0	2	4	1	1	2		P06756	1		P06756	1
1	P46940	IQGA1_HUMAN	Ras GTPase-activating-like protein IQGAP1 OS=Homo sapiens GN=IQGAP1 PE=1 SV=1	F179B_HUMAN	0	1	0	0	0	3	0	0	0	3	0	3	3	1	1	2		P46940	1		P46940	1
1	O14966	RAB7L_HUMAN	Ras-related protein Rab-7L1 OS=Homo sapiens GN=RAB29 PE=1 SV=1	EF2_HUMAN	0	0	0	0	0	2	0	0	0	2	0	2	2	1	1	2		O14966	1		O14966	1
1	Q6IAA8	LTOR1_HUMAN	Ragulator complex protein LAMTOR1 OS=Homo sapiens GN=LAMTOR1 PE=1 SV=2	MGLL_HUMAN	0	0	0	0	0	2	1	2	1	0	1	2	5	1	1	2		Q6IAA8	1		Q6IAA8	1
1	P12931	SRC_HUMAN	Proto-oncogene tyrosine-protein kinase Src OS=Homo sapiens GN=SRC PE=1 SV=3	TPIS_HUMAN	0	0	1	0	1	3	1	0	2	0	1	4	4	1	1	2		P12931	1		P12931	1
1	Q10589	BST2_HUMAN	Bone marrow stromal antigen 2 OS=Homo sapiens GN=BST2 PE=1 SV=1	ABHD8_HUMAN	2	0	1	0	0	0	0	2	1	0	0	0	3	1	1	2		Q10589	1		Q10589	1
1	P25788	PSA3_HUMAN	Proteasome subunit alpha type-3 OS=Homo sapiens GN=PSMA3 PE=1 SV=2	DNJA1_HUMAN	0	4	0	0	0	1	0	1	0	2	0	1	3	1	1	2		P25788	1		P25788	1
1	Q16348	S15A2_HUMAN	Solute carrier family 15 member 2 OS=Homo sapiens GN=SLC15A2 PE=2 SV=2	CD47_HUMAN	0	0	0	0	0	3	0	0	0	2	0	3	2	1	1	2		Q16348	1		Q16348	1
1	P36969	GPX4_HUMAN	Phospholipid hydroperoxide glutathione peroxidase, mitochondrial OS=Homo sapiens GN=GPX4 PE=1 SV=3	LAMP1_HUMAN	0	0	0	0	1	2	1	0	1	2	0	3	4	1	1	2		P36969	1		P36969	1
1	Q99828	CIB1_HUMAN	Calcium and integrin-binding protein 1 OS=Homo sapiens GN=CIB1 PE=1 SV=4	HEPS_HUMAN	0	0	0	0	0	6	0	0	0	4	0	6	4	1	1	2		Q99828	1		Q99828	1
1	P48509	CD151_HUMAN	CD151 antigen OS=Homo sapiens GN=CD151 PE=1 SV=3	ACTN4_HUMAN	0	0	1	0	0	3	2	1	1	1	1	3	6	1	1	2		P48509	1		P48509	1
1	Q8WW52	F151A_HUMAN	Protein FAM151A OS=Homo sapiens GN=FAM151A PE=2 SV=2	VATG1_HUMAN	0	3	0	1	0	0	0	1	1	2	0	0	4	1	1	2		Q8WW52	1		Q8WW52	1
1	P13861	KAP2_HUMAN	cAMP-dependent protein kinase type II-alpha regulatory subunit OS=Homo sapiens GN=PRKAR2A PE=1 SV=2	CR1_HUMAN	0	0	0	0	0	4	0	0	0	2	0	4	2	1	1	2		P13861	1		P13861	1
1	P52758	UK114_HUMAN	Ribonuclease UK114 OS=Homo sapiens GN=HRSP12 PE=1 SV=1	ACOC_HUMAN	0	3	0	0	1	0	0	0	0	2	0	1	2	1	1	2		P52758	1		P52758	1
1	Q9NZM1	MYOF_HUMAN	Myoferlin OS=Homo sapiens GN=MYOF PE=1 SV=1	PSMD9_HUMAN	0	0	0	0	0	5	0	0	5	0	1	5	6	1	1	2		Q9NZM1	1		Q9NZM1	1
1	P37802	TAGL2_HUMAN	Transgelin-2 OS=Homo sapiens GN=TAGLN2 PE=1 SV=3	S26A4_HUMAN	0	0	0	0	0	4	0	0	0	2	1	4	3	1	1	2		P37802	1		P37802	1
1	Q08722	CD47_HUMAN	Leukocyte surface antigen CD47 OS=Homo sapiens GN=CD47 PE=1 SV=1	ARF6_HUMAN	0	0	0	0	0	2	0	0	2	1	0	2	3	1	1	2		Q08722	1		Q08722	1
1	P05981	HEPS_HUMAN	Serine protease hepsin OS=Homo sapiens GN=HPN PE=1 SV=1	ERIC5_HUMAN	0	1	0	2	0	0	0	1	1	0	2	0	4	1	1	2		P05981	1		P05981	1
1	O43511	S26A4_HUMAN	Pendrin OS=Homo sapiens GN=SLC26A4 PE=1 SV=1	DIP2A_HUMAN	1	0	0	0	0	2	0	0	1	0	2	2	3	1	1	2		O43511	1		O43511	1
1	Q8N5I2	ARRD1_HUMAN	Arrestin domain-containing protein 1 OS=Homo sapiens GN=ARRDC1 PE=2 SV=1	CPNE5_HUMAN	2	0	1	1	0	1	1	0	0	4	1	1	6	1	1	2		Q8N5I2	1		Q8N5I2	1
1	P30039	PBLD_HUMAN	Phenazine biosynthesis-like domain-containing protein OS=Homo sapiens GN=PBLD PE=1 SV=2	CSPG4_HUMAN	0	14	0	0	0	1	0	0	0	2	0	1	2	1	1	2		P30039	1		P30039	1
1	Q9NP85	PODO_HUMAN	Podocin OS=Homo sapiens GN=NPHS2 PE=1 SV=1	WISP2_HUMAN	1	1	1	2	0	0	4	0	1	1	1	0	7	1	1	2		Q9NP85	1		Q9NP85	1
1	P82980	RET5_HUMAN	Retinol-binding protein 5 OS=Homo sapiens GN=RBP5 PE=1 SV=3	SIAE_HUMAN	0	2	1	1	0	1	2	0	0	0	0	1	2	1	1	2		P82980	1		P82980	1
1	P11586	C1TC_HUMAN	C-1-tetrahydrofolate synthase, cytoplasmic OS=Homo sapiens GN=MTHFD1 PE=1 SV=3	COR1B_HUMAN	0	2	0	1	0	0	1	0	1	4	1	0	7	1	1	2		P11586	1		P11586	1
1	Q68CP4	HGNAT_HUMAN	Heparan-alpha-glucosaminide N-acetyltransferase OS=Homo sapiens GN=HGSNAT PE=1 SV=2	CRUM2_HUMAN	0	0	0	0	0	2	0	0	2	1	0	2	3	1	1	2		Q68CP4	1		Q68CP4	1
1	Q08257	QOR_HUMAN	Quinone oxidoreductase OS=Homo sapiens GN=CRYZ PE=1 SV=1	GELS_HUMAN	0	3	0	0	0	1	0	2	0	1	0	1	3	1	1	2		Q08257	1		Q08257	1
1	K7EJ46	SIM22_HUMAN	Small integral membrane protein 22 OS=Homo sapiens GN=SMIM22 PE=2 SV=1	HPCA_HUMAN	0	3	0	0	0	0	1	0	0	4	0	0	5	1	1	2		K7EJ46	1		K7EJ46	1
1	Q9HB40	RISC_HUMAN	Retinoid-inducible serine carboxypeptidase OS=Homo sapiens GN=SCPEP1 PE=1 SV=1	RIPL2_HUMAN	0	9	0	0	0	0	2	1	1	0	0	0	4	1	1	2		Q9HB40	1		Q9HB40	1
1	O15243	OBRG_HUMAN	Leptin receptor gene-related protein OS=Homo sapiens GN=LEPROT PE=1 SV=1	SODE_HUMAN	0	0	0	1	1	2	0	0	1	2	1	3	4	1	1	2		O15243	1		O15243	1
1	P04433	KV309_HUMAN	Ig kappa chain V-III region VG (Fragment) OS=Homo sapiens PE=1 SV=1	FKB1A_HUMAN	0	1	1	0	0	2	0	0	1	0	2	2	3	1	1	2		P04433	1		P04433	1
1	Q9UBQ7	GRHPR_HUMAN	Glyoxylate reductase/hydroxypyruvate reductase OS=Homo sapiens GN=GRHPR PE=1 SV=1	PPT1_HUMAN	0	4	0	0	0	1	0	0	0	4	0	1	4	1	1	2		Q9UBQ7	1		Q9UBQ7	1
1	P14384	CBPM_HUMAN	Carboxypeptidase M OS=Homo sapiens GN=CPM PE=1 SV=2	DIP2B_HUMAN	0	7	0	0	0	1	1	1	0	3	0	1	5	1	1	2		P14384	1		P14384	1
1	P20711	DDC_HUMAN	Aromatic-L-amino-acid decarboxylase OS=Homo sapiens GN=DDC PE=1 SV=2	TSN6_HUMAN	0	13	0	0	0	1	0	0	0	7	0	1	7	1	1	2		P20711	1		P20711	1
1	P11233	RALA_HUMAN	Ras-related protein Ral-A OS=Homo sapiens GN=RALA PE=1 SV=1	HEBP2_HUMAN	0	1	0	0	0	2	0	0	0	2	0	2	2	1	1	2		P11233	1		P11233	1
1	Q96RW7	HMCN1_HUMAN	Hemicentin-1 OS=Homo sapiens GN=HMCN1 PE=1 SV=2	RAP2A_HUMAN	0	4	0	1	0	0	0	0	3	0	1	0	4	1	1	2		Q96RW7	1		Q96RW7	1
1	Q8IV08	PLD3_HUMAN	Phospholipase D3 OS=Homo sapiens GN=PLD3 PE=1 SV=1	CALB1_HUMAN	0	2	0	1	0	0	3	0	1	0	0	0	4	1	1	2		Q8IV08	1		Q8IV08	1
1	Q86UN3	R4RL2_HUMAN	Reticulon-4 receptor-like 2 OS=Homo sapiens GN=RTN4RL2 PE=1 SV=1	IFM1_HUMAN	0	2	1	1	0	0	1	3	0	0	0	0	4	1	1	2		Q86UN3	1		Q86UN3	1
1	P51688	SPHM_HUMAN	N-sulphoglucosamine sulphohydrolase OS=Homo sapiens GN=SGSH PE=1 SV=1	HS90A_HUMAN	0	2	0	1	0	0	1	3	0	0	0	0	4	1	1	2		P51688	1		P51688	1
1	Q9UKU6	TRHDE_HUMAN	Thyrotropin-releasing hormone-degrading ectoenzyme OS=Homo sapiens GN=TRHDE PE=2 SV=1	PTN6_HUMAN	0	17	0	1	0	0	0	0	2	0	0	0	2	1	1	2		Q9UKU6	1		Q9UKU6	1
1	Q5D862	FILA2_HUMAN	Filaggrin-2 OS=Homo sapiens GN=FLG2 PE=1 SV=1	KC1G3_HUMAN	0	3	0	1	0	0	0	10	0	0	0	0	10	1	1	2		Q5D862	1		Q5D862	1
1	P54760	EPHB4_HUMAN	Ephrin type-B receptor 4 OS=Homo sapiens GN=EPHB4 PE=1 SV=2	AMPL_HUMAN	0	0	0	2	0	0	0	4	0	0	0	0	4	1	1	2		P54760	1		P54760	1
1	P30530	UFO_HUMAN	Tyrosine-protein kinase receptor UFO OS=Homo sapiens GN=AXL PE=1 SV=3	DYRK3_HUMAN	1	0	2	1	0	1	0	1	1	0	3	1	5	1	1	2		P30530	1		P30530	1
1	P54753	EPHB3_HUMAN	Ephrin type-B receptor 3 OS=Homo sapiens GN=EPHB3 PE=1 SV=2	NDRG2_HUMAN	0	0	1	2	0	0	0	3	0	0	0	0	3	1	1	2		P54753	1		P54753	1
1	P13796	PLSL_HUMAN	Plastin-2 OS=Homo sapiens GN=LCP1 PE=1 SV=6	1433E_HUMAN	0	0	1	1	1	7	0	4	1	1	0	8	6	1	1	2		P13796	1		P13796	1
1	P04434	KV310_HUMAN	Ig kappa chain V-III region VH (Fragment) OS=Homo sapiens PE=4 SV=1	S23A1_HUMAN	0	1	2	0	0	1	1	0	0	2	0	1	3	1	1	2		P04434	1		P04434	1
1	Q9UGL9	CRCT1_HUMAN	Cysteine-rich C-terminal protein 1 OS=Homo sapiens GN=CRCT1 PE=2 SV=1	GBG5_HUMAN	0	6	0	0	0	0	0	7	0	0	0	0	7	1	1	2		Q9UGL9	1		Q9UGL9	1
1	Q01518	CAP1_HUMAN	Adenylyl cyclase-associated protein 1 OS=Homo sapiens GN=CAP1 PE=1 SV=5	TTHY_HUMAN	0	1	0	0	0	7	0	0	0	5	0	7	5	1	1	2		Q01518	1		Q01518	1
1	P35558	PCKGC_HUMAN	Phosphoenolpyruvate carboxykinase, cytosolic [GTP] OS=Homo sapiens GN=PCK1 PE=1 SV=3	DOCK9_HUMAN	0	7	0	0	0	0	1	0	0	4	0	0	5	1	1	2		P35558	1		P35558	1
1	P01892	1A02_HUMAN	HLA class I histocompatibility antigen, A-2 alpha chain OS=Homo sapiens GN=HLA-A PE=1 SV=1	CLD2_HUMAN	1	0	2	0	0	0	0	2	0	1	0	0	3	1	1	2		P01892	1		P01892	1
1	P04279	SEMG1_HUMAN	Semenogelin-1 OS=Homo sapiens GN=SEMG1 PE=1 SV=2	SNAA_HUMAN	0	0	0	0	0	6	0	0	0	0	44	6	44	1	1	2		P04279	1		P04279	1
1	A6NI73	LIRA5_HUMAN	Leukocyte immunoglobulin-like receptor subfamily A member 5 OS=Homo sapiens GN=LILRA5 PE=1 SV=1	HV308_HUMAN	0	1	0	6	0	0	3	0	0	0	1	0	4	1	1	2		A6NI73	1		A6NI73	1
1	Q9H2M3	BHMT2_HUMAN	S-methylmethionine--homocysteine S-methyltransferase BHMT2 OS=Homo sapiens GN=BHMT2 PE=1 SV=1	MGRN1_HUMAN	0	14	0	0	0	0	0	0	0	3	0	0	3	1	1	2		Q9H2M3	1		Q9H2M3	1
1	P81172	HEPC_HUMAN	Hepcidin OS=Homo sapiens GN=HAMP PE=1 SV=2	PPCS_HUMAN	0	0	0	2	0	0	0	0	2	0	0	0	2	1	1	2		P81172	1		P81172	1
1	P08779	K1C16_HUMAN	Keratin, type I cytoskeletal 16 OS=Homo sapiens GN=KRT16 PE=1 SV=4	ARRD1_HUMAN	10	0	0	0	0	0	0	0	0	0	2	0	2	1	1	2		P08779	1		P08779	1
1	O75891	AL1L1_HUMAN	Cytosolic 10-formyltetrahydrofolate dehydrogenase OS=Homo sapiens GN=ALDH1L1 PE=1 SV=2	PBLD_HUMAN	0	12	0	1	0	0	0	0	0	9	0	0	9	1	1	2		O75891	1		O75891	1
1	Q9UKU9	ANGL2_HUMAN	Angiopoietin-related protein 2 OS=Homo sapiens GN=ANGPTL2 PE=2 SV=1	NUDC2_HUMAN	0	8	0	0	0	0	0	0	2	0	0	0	2	1	1	2		Q9UKU9	1		Q9UKU9	1
1	Q9H3R2	MUC13_HUMAN	Mucin-13 OS=Homo sapiens GN=MUC13 PE=1 SV=3	DP13B_HUMAN	0	3	0	0	0	0	0	0	1	2	1	0	4	1	1	2		Q9H3R2	1		Q9H3R2	1
1	O60449	LY75_HUMAN	Lymphocyte antigen 75 OS=Homo sapiens GN=LY75 PE=1 SV=3	COTL1_HUMAN	0	0	0	2	0	0	0	0	2	0	0	0	2	1	1	2		O60449	1		O60449	1
1	Q6UXG3	CLM9_HUMAN	CMRF35-like molecule 9 OS=Homo sapiens GN=CD300LG PE=1 SV=2	DEST_HUMAN	0	0	0	2	0	0	0	1	0	0	4	0	5	1	1	2		Q6UXG3	1		Q6UXG3	1
1	O95716	RAB3D_HUMAN	Ras-related protein Rab-3D OS=Homo sapiens GN=RAB3D PE=1 SV=1	TPP1_HUMAN	0	0	0	0	0	15	0	0	0	6	0	15	6	1	1	2		O95716	1		O95716	1
1	P12830	CADH1_HUMAN	Cadherin-1 OS=Homo sapiens GN=CDH1 PE=1 SV=3	ITA3_HUMAN	0	0	0	0	0	4	4	1	1	0	0	4	6	1	1	2		P12830	1		P12830	1
1	P11047	LAMC1_HUMAN	Laminin subunit gamma-1 OS=Homo sapiens GN=LAMC1 PE=1 SV=3	LEG8_HUMAN	0	0	0	5	0	0	1	0	4	0	1	0	6	1	1	2		P11047	1		P11047	1
1	P42330	AK1C3_HUMAN	Aldo-keto reductase family 1 member C3 OS=Homo sapiens GN=AKR1C3 PE=1 SV=4	B2MG_HUMAN	0	5	0	0	0	0	0	2	0	1	0	0	3	1	1	2		P42330	1		P42330	1
1	O00194	RB27B_HUMAN	Ras-related protein Rab-27B OS=Homo sapiens GN=RAB27B PE=1 SV=4	PODO_HUMAN	0	0	0	0	2	3	1	0	0	4	0	5	5	1	1	2		O00194	1		O00194	1
1	Q8N474	SFRP1_HUMAN	Secreted frizzled-related protein 1 OS=Homo sapiens GN=SFRP1 PE=1 SV=1	FAS_HUMAN	0	3	0	0	0	0	0	0	0	3	0	0	3	1	1	2		Q8N474	1		Q8N474	1
1	P19075	TSN8_HUMAN	Tetraspanin-8 OS=Homo sapiens GN=TSPAN8 PE=1 SV=1	UBL3_HUMAN	2	0	0	0	0	0	0	0	0	2	0	0	2	1	1	2		P19075	1		P19075	1
1	P80188	NGAL_HUMAN	Neutrophil gelatinase-associated lipocalin OS=Homo sapiens GN=LCN2 PE=1 SV=2	SRGP1_HUMAN	0	4	0	0	0	0	0	3	0	0	0	0	3	1	1	2		P80188	1		P80188	1
1	P20337	RAB3B_HUMAN	Ras-related protein Rab-3B OS=Homo sapiens GN=RAB3B PE=1 SV=2	ABHEB_HUMAN	0	0	0	0	0	9	0	0	0	7	0	9	7	1	1	2		P20337	1		P20337	1
1	P02763	A1AG1_HUMAN	Alpha-1-acid glycoprotein 1 OS=Homo sapiens GN=ORM1 PE=1 SV=1	S35F6_HUMAN	0	0	0	0	0	11	1	0	0	8	0	11	9	1	1	2		P02763	1		P02763	1
1	P53801	PTTG_HUMAN	Pituitary tumor-transforming gene 1 protein-interacting protein OS=Homo sapiens GN=PTTG1IP PE=1 SV=1	TGM2_HUMAN	0	1	0	0	0	5	0	0	0	6	0	5	6	1	1	2		P53801	1		P53801	1
1	P61006	RAB8A_HUMAN	Ras-related protein Rab-8A OS=Homo sapiens GN=RAB8A PE=1 SV=1	S22A6_HUMAN	0	0	0	0	0	9	0	0	0	3	0	9	3	1	1	2		P61006	1		P61006	1
1	P68363	TBA1B_HUMAN	Tubulin alpha-1B chain OS=Homo sapiens GN=TUBA1B PE=1 SV=1	ARF1_HUMAN	0	0	0	0	0	11	0	0	0	10	0	11	10	1	1	2		P68363	1		P68363	1
1	P19652	A1AG2_HUMAN	Alpha-1-acid glycoprotein 2 OS=Homo sapiens GN=ORM2 PE=1 SV=2	PSAL_HUMAN	0	0	0	0	0	7	0	0	0	6	0	7	6	1	1	2		P19652	1		P19652	1
1	O95342	ABCBB_HUMAN	Bile salt export pump OS=Homo sapiens GN=ABCB11 PE=1 SV=2	PRDX1_HUMAN	0	1	0	0	0	2	0	0	0	2	0	2	2	1	1	2		O95342	1		O95342	1
1	P01611	KV119_HUMAN	Ig kappa chain V-I region Wes OS=Homo sapiens PE=1 SV=1	APOE_HUMAN	0	2	0	0	0	1	0	0	0	4	0	1	4	1	1	2		P01611	1		P01611	1
1	P60660	MYL6_HUMAN	Myosin light polypeptide 6 OS=Homo sapiens GN=MYL6 PE=1 SV=2	VAT1_HUMAN	0	0	0	0	0	3	0	0	0	2	0	3	2	1	1	2		P60660	1		P60660	1
1	P36543	VATE1_HUMAN	V-type proton ATPase subunit E 1 OS=Homo sapiens GN=ATP6V1E1 PE=1 SV=1	IC1_HUMAN	0	0	0	0	0	4	0	0	1	6	0	4	7	1	1	2		P36543	1		P36543	1
1	Q00610	CLH1_HUMAN	Clathrin heavy chain 1 OS=Homo sapiens GN=CLTC PE=1 SV=5	GRB14_HUMAN	0	0	0	0	0	4	0	0	0	7	0	4	7	1	1	2		Q00610	1		Q00610	1
1	P55290	CAD13_HUMAN	Cadherin-13 OS=Homo sapiens GN=CDH13 PE=1 SV=1	BLVRB_HUMAN	0	0	0	0	0	2	0	2	0	0	1	2	3	1	1	2		P55290	1		P55290	1
1	Q8IY95	TM192_HUMAN	Transmembrane protein 192 OS=Homo sapiens GN=TMEM192 PE=1 SV=1	AP2A2_HUMAN	0	0	0	0	0	3	0	0	0	2	0	3	2	1	1	2		Q8IY95	1		Q8IY95	1
1	Q93050	VPP1_HUMAN	V-type proton ATPase 116 kDa subunit a isoform 1 OS=Homo sapiens GN=ATP6V0A1 PE=2 SV=3	RET5_HUMAN	0	0	0	0	1	3	2	0	0	1	0	4	3	1	1	2		Q93050	1		Q93050	1
1	Q9Y696	CLIC4_HUMAN	Chloride intracellular channel protein 4 OS=Homo sapiens GN=CLIC4 PE=1 SV=4	VTA1_HUMAN	0	2	0	0	0	1	0	0	0	19	0	1	19	1	1	2		Q9Y696	1		Q9Y696	1
1	P55259	GP2_HUMAN	Pancreatic secretory granule membrane major glycoprotein GP2 OS=Homo sapiens GN=GP2 PE=2 SV=3	STAM2_HUMAN	0	0	0	0	0	3	3	0	0	0	1	3	4	1	1	2		P55259	1		P55259	1
1	P25786	PSA1_HUMAN	Proteasome subunit alpha type-1 OS=Homo sapiens GN=PSMA1 PE=1 SV=1	PTN11_HUMAN	0	3	0	0	0	1	0	0	0	2	0	1	2	1	1	2		P25786	1		P25786	1
1	P17900	SAP3_HUMAN	Ganglioside GM2 activator OS=Homo sapiens GN=GM2A PE=1 SV=4	RENR_HUMAN	1	4	0	0	0	1	0	0	0	2	0	1	2	1	1	2		P17900	1		P17900	1
1	P05783	K1C18_HUMAN	Keratin, type I cytoskeletal 18 OS=Homo sapiens GN=KRT18 PE=1 SV=2	RARR2_HUMAN	0	0	0	0	0	2	0	0	2	0	0	2	2	1	1	2		P05783	1		P05783	1
1	P62807	H2B1C_HUMAN	Histone H2B type 1-C/E/F/G/I OS=Homo sapiens GN=HIST1H2BC PE=1 SV=4	CK054_HUMAN	0	9	0	0	0	0	0	0	0	3	0	0	3	1	1	2		P62807	1		P62807	1
1	P02042	HBD_HUMAN	Hemoglobin subunit delta OS=Homo sapiens GN=HBD PE=1 SV=2	NXNL1_HUMAN	0	13	0	0	0	0	0	0	0	13	0	0	13	1	1	2		P02042	1		P02042	1
1	P29622	KAIN_HUMAN	Kallistatin OS=Homo sapiens GN=SERPINA4 PE=1 SV=3	C1TC_HUMAN	1	12	0	1	0	0	0	0	0	2	0	0	2	1	1	2		P29622	1		P29622	1
1	P21695	GPDA_HUMAN	Glycerol-3-phosphate dehydrogenase [NAD(+)], cytoplasmic OS=Homo sapiens GN=GPD1 PE=1 SV=4	NARR_HUMAN	0	9	0	0	0	0	0	0	0	3	0	0	3	1	1	2		P21695	1		P21695	1
1	O95954	FTCD_HUMAN	Formimidoyltransferase-cyclodeaminase OS=Homo sapiens GN=FTCD PE=1 SV=2	CD36_HUMAN	0	9	0	1	0	0	0	0	0	10	0	0	10	1	1	2		O95954	1		O95954	1
1	P05546	HEP2_HUMAN	Heparin cofactor 2 OS=Homo sapiens GN=SERPIND1 PE=1 SV=3	S10AB_HUMAN	0	5	0	0	0	0	0	1	0	3	0	0	4	1	1	2		P05546	1		P05546	1
1	P00352	AL1A1_HUMAN	Retinal dehydrogenase 1 OS=Homo sapiens GN=ALDH1A1 PE=1 SV=2	ESTD_HUMAN	0	12	0	0	0	0	0	0	0	4	0	0	4	1	1	2		P00352	1		P00352	1
1	P04908	H2A1B_HUMAN	Histone H2A type 1-B/E OS=Homo sapiens GN=HIST1H2AB PE=1 SV=2	S10A8_HUMAN	0	5	0	0	0	0	0	0	0	4	0	0	4	1	1	2		P04908	1		P04908	1
1	P49747	COMP_HUMAN	Cartilage oligomeric matrix protein OS=Homo sapiens GN=COMP PE=1 SV=2	ICK_HUMAN	0	4	0	0	0	0	0	9	0	0	0	0	9	1	1	2		P49747	1		P49747	1
1	P35052	GPC1_HUMAN	Glypican-1 OS=Homo sapiens GN=GPC1 PE=1 SV=2	SH24A_HUMAN	0	5	0	1	0	0	2	1	0	0	0	0	3	1	1	2		P35052	1		P35052	1
1	Q8NC51	PAIRB_HUMAN	Plasminogen activator inhibitor 1 RNA-binding protein OS=Homo sapiens GN=SERBP1 PE=1 SV=2	CTDSL_HUMAN	0	2	0	0	0	0	0	2	0	0	0	0	2	1	1	2		Q8NC51	1		Q8NC51	1
1	P60900	PSA6_HUMAN	Proteasome subunit alpha type-6 OS=Homo sapiens GN=PSMA6 PE=1 SV=1	HGNAT_HUMAN	0	3	0	0	0	0	0	0	0	3	0	0	3	1	1	2		P60900	1		P60900	1
1	Q6UWP8	SBSN_HUMAN	Suprabasin OS=Homo sapiens GN=SBSN PE=2 SV=2	PSA5_HUMAN	0	3	0	0	0	0	0	2	0	0	0	0	2	1	1	2		Q6UWP8	1		Q6UWP8	1
1	P48061	SDF1_HUMAN	Stromal cell-derived factor 1 OS=Homo sapiens GN=CXCL12 PE=1 SV=1	GIPC1_HUMAN	0	2	0	0	0	0	1	0	2	0	0	0	3	1	1	2		P48061	1		P48061	1
1	Q96C23	GALM_HUMAN	Aldose 1-epimerase OS=Homo sapiens GN=GALM PE=1 SV=1	RRAS_HUMAN	0	3	0	0	0	0	0	0	0	4	0	0	4	1	1	2		Q96C23	1		Q96C23	1
1	O95171	SCEL_HUMAN	Sciellin OS=Homo sapiens GN=SCEL PE=1 SV=2	ANAG_HUMAN	0	4	0	0	2	0	0	2	0	0	0	2	2	1	1	2		O95171	1		O95171	1
1	P55786	PSA_HUMAN	Puromycin-sensitive aminopeptidase OS=Homo sapiens GN=NPEPPS PE=1 SV=2	MYL6B_HUMAN	0	2	0	0	0	0	0	0	0	2	0	0	2	1	1	2		P55786	1		P55786	1
1	Q16851	UGPA_HUMAN	UTP--glucose-1-phosphate uridylyltransferase OS=Homo sapiens GN=UGP2 PE=1 SV=5	PCY2_HUMAN	0	3	0	0	0	0	0	0	0	3	0	0	3	1	1	2		Q16851	1		Q16851	1
1	O14818	PSA7_HUMAN	Proteasome subunit alpha type-7 OS=Homo sapiens GN=PSMA7 PE=1 SV=1	K2C1_HUMAN	0	4	0	0	6	0	0	0	0	2	0	6	2	1	1	2		O14818	1		O14818	1
1	P13797	PLST_HUMAN	Plastin-3 OS=Homo sapiens GN=PLS3 PE=1 SV=4	RAP2C_HUMAN	0	7	0	0	0	0	0	3	0	1	0	0	4	1	1	2		P13797	1		P13797	1
1	Q92692	PVRL2_HUMAN	Nectin-2 OS=Homo sapiens GN=PVRL2 PE=1 SV=1	EAA3_HUMAN	0	2	0	1	0	0	0	0	0	0	2	0	2	1	1	2		Q92692	1		Q92692	1
1	O43570	CAH12_HUMAN	Carbonic anhydrase 12 OS=Homo sapiens GN=CA12 PE=1 SV=1	PCX4_HUMAN	0	2	0	0	0	0	0	0	0	4	0	0	4	1	1	2		O43570	1		O43570	1
1	Q92820	GGH_HUMAN	Gamma-glutamyl hydrolase OS=Homo sapiens GN=GGH PE=1 SV=2	RAB2A_HUMAN	3	1	0	0	0	0	0	0	0	5	0	0	5	1	1	2		Q92820	1		Q92820	1
1	O95497	VNN1_HUMAN	Pantetheinase OS=Homo sapiens GN=VNN1 PE=1 SV=2	SCAM2_HUMAN	0	2	0	0	0	0	0	0	0	2	0	0	2	1	1	2		O95497	1		O95497	1
1	P50053	KHK_HUMAN	Ketohexokinase OS=Homo sapiens GN=KHK PE=1 SV=1	SHC1_HUMAN	0	4	0	0	0	0	0	0	0	3	0	0	3	1	1	2		P50053	1		P50053	1
1	Q06278	AOXA_HUMAN	Aldehyde oxidase OS=Homo sapiens GN=AOX1 PE=1 SV=2	TLDC1_HUMAN	0	3	0	0	0	0	0	0	0	2	0	0	2	1	1	2		Q06278	1		Q06278	1
1	Q06481	APLP2_HUMAN	Amyloid-like protein 2 OS=Homo sapiens GN=APLP2 PE=1 SV=2	UBE2O_HUMAN	0	0	0	3	0	0	0	0	2	0	0	0	2	1	1	2		Q06481	1		Q06481	1
1	Q96FL8	S47A1_HUMAN	Multidrug and toxin extrusion protein 1 OS=Homo sapiens GN=SLC47A1 PE=1 SV=1	ACY3_HUMAN	0	0	1	1	0	1	5	6	2	6	2	1	21	1	1	2		Q96FL8	1		Q96FL8	1
1	P35613	BASI_HUMAN	Basigin OS=Homo sapiens GN=BSG PE=1 SV=2	O13H1_HUMAN	0	0	0	1	0	0	5	3	2	2	2	0	14	1	1	2		P35613	1		P35613	1
1	P61916	NPC2_HUMAN	Epididymal secretory protein E1 OS=Homo sapiens GN=NPC2 PE=1 SV=1	APT_HUMAN	0	0	1	1	0	0	3	5	3	3	4	0	18	1	1	2		P61916	1		P61916	1
1	Q9NUN5	LMBD1_HUMAN	Probable lysosomal cobalamin transporter OS=Homo sapiens GN=LMBRD1 PE=1 SV=1	DDAH1_HUMAN	0	0	0	1	0	1	1	2	3	3	6	1	15	1	1	2		Q9NUN5	1		Q9NUN5	1
1	Q15599	NHRF2_HUMAN	Na(+)/H(+) exchange regulatory cofactor NHE-RF2 OS=Homo sapiens GN=SLC9A3R2 PE=1 SV=2	RHG12_HUMAN	0	0	1	1	0	0	3	2	3	1	3	0	12	1	1	2		Q15599	1		Q15599	1
1	A0PJK1	SC5AA_HUMAN	Sodium/glucose cotransporter 5 OS=Homo sapiens GN=SLC5A10 PE=1 SV=2	FOLH1_HUMAN	0	1	0	0	0	0	3	2	2	4	1	0	12	1	1	2		A0PJK1	1		A0PJK1	1
1	P00441	SODC_HUMAN	Superoxide dismutase [Cu-Zn] OS=Homo sapiens GN=SOD1 PE=1 SV=2	TRI47_HUMAN	0	0	1	0	0	0	3	3	1	2	0	0	9	1	1	2		P00441	1		P00441	1
1	Q8WWT9	S13A3_HUMAN	Solute carrier family 13 member 3 OS=Homo sapiens GN=SLC13A3 PE=1 SV=1	KALRN_HUMAN	0	0	0	1	0	1	6	0	2	4	0	1	12	1	1	2		Q8WWT9	1		Q8WWT9	1
1	P05556	ITB1_HUMAN	Integrin beta-1 OS=Homo sapiens GN=ITGB1 PE=1 SV=2	QOR_HUMAN	0	0	1	0	0	0	8	5	4	0	1	0	18	1	1	2		P05556	1		P05556	1
1	Q13183	S13A2_HUMAN	Solute carrier family 13 member 2 OS=Homo sapiens GN=SLC13A2 PE=2 SV=1	PCAT2_HUMAN	0	1	0	0	0	1	2	0	2	7	0	1	11	1	1	2		Q13183	1		Q13183	1
1	Q8WTX9	ZDHC1_HUMAN	Probable palmitoyltransferase ZDHHC1 OS=Homo sapiens GN=ZDHHC1 PE=2 SV=1	CAN1_HUMAN	0	0	0	1	0	1	2	2	1	0	2	1	7	1	1	2		Q8WTX9	1		Q8WTX9	1
1	P45974	UBP5_HUMAN	Ubiquitin carboxyl-terminal hydrolase 5 OS=Homo sapiens GN=USP5 PE=1 SV=2	REPS1_HUMAN	0	0	1	0	0	0	2	2	2	0	0	0	6	1	1	2		P45974	1		P45974	1
1	P31431	SDC4_HUMAN	Syndecan-4 OS=Homo sapiens GN=SDC4 PE=1 SV=2	TGBR3_HUMAN	1	1	1	0	0	0	3	4	1	0	2	0	10	1	1	2		P31431	1		P31431	1
1	O76076	WISP2_HUMAN	WNT1-inducible-signaling pathway protein 2 OS=Homo sapiens GN=WISP2 PE=1 SV=1	AP2M1_HUMAN	0	0	0	1	0	0	2	1	2	0	3	0	8	1	1	2		O76076	1		O76076	1
1	P00995	ISK1_HUMAN	Pancreatic secretory trypsin inhibitor OS=Homo sapiens GN=SPINK1 PE=1 SV=2	ACE2_HUMAN	0	0	1	1	0	0	3	3	1	0	6	0	13	1	1	2		P00995	1		P00995	1
1	P54710	ATNG_HUMAN	Sodium/potassium-transporting ATPase subunit gamma OS=Homo sapiens GN=FXYD2 PE=1 SV=3	GDPD3_HUMAN	0	0	1	0	0	1	3	1	3	3	1	1	11	1	1	2		P54710	1		P54710	1
1	P34096	RNAS4_HUMAN	Ribonuclease 4 OS=Homo sapiens GN=RNASE4 PE=1 SV=3	VASP_HUMAN	0	1	0	1	0	1	2	2	3	0	0	1	7	1	1	2		P34096	1		P34096	1
1	Q96K21	ANCHR_HUMAN	Abscission/NoCut checkpoint regulator OS=Homo sapiens GN=ZFYVE19 PE=1 SV=3	SIM22_HUMAN	0	0	1	0	0	0	2	2	0	0	0	0	4	1	1	2		Q96K21	1		Q96K21	1
1	P52943	CRIP2_HUMAN	Cysteine-rich protein 2 OS=Homo sapiens GN=CRIP2 PE=1 SV=1	COBL1_HUMAN	0	0	0	0	0	1	2	2	1	0	1	1	6	1	1	2		P52943	1		P52943	1
1	Q9Y5K8	VATD_HUMAN	V-type proton ATPase subunit D OS=Homo sapiens GN=ATP6V1D PE=1 SV=1	MMRN2_HUMAN	0	1	0	0	0	1	2	0	3	1	1	1	7	1	1	2		Q9Y5K8	1		Q9Y5K8	1
1	O43291	SPIT2_HUMAN	Kunitz-type protease inhibitor 2 OS=Homo sapiens GN=SPINT2 PE=1 SV=2	NP1L4_HUMAN	0	0	1	1	0	0	0	1	3	0	2	0	6	1	1	2		O43291	1		O43291	1
1	P29373	RABP2_HUMAN	Cellular retinoic acid-binding protein 2 OS=Homo sapiens GN=CRABP2 PE=1 SV=2	DNJB6_HUMAN	0	0	0	0	0	1	0	2	2	0	1	1	5	1	1	2		P29373	1		P29373	1
1	Q6GTX8	LAIR1_HUMAN	Leukocyte-associated immunoglobulin-like receptor 1 OS=Homo sapiens GN=LAIR1 PE=1 SV=1	C1RL_HUMAN	1	0	0	0	3	0	3	1	1	0	3	3	8	1	1	2		Q6GTX8	1		Q6GTX8	1
1	P26006	ITA3_HUMAN	Integrin alpha-3 OS=Homo sapiens GN=ITGA3 PE=1 SV=5	VILI_HUMAN	1	0	0	1	0	0	4	1	2	0	1	0	8	1	1	2		P26006	1		P26006	1
1	P07288	KLK3_HUMAN	Prostate-specific antigen OS=Homo sapiens GN=KLK3 PE=1 SV=2	SNX18_HUMAN	0	0	0	0	3	1	3	0	2	0	1	4	6	1	1	2		P07288	1		P07288	1
1	P80748	LV302_HUMAN	Ig lambda chain V-III region LOI OS=Homo sapiens PE=1 SV=1	ULK3_HUMAN	0	1	0	0	0	0	1	3	2	1	0	0	7	1	1	2		P80748	1		P80748	1
1	O94919	ENDD1_HUMAN	Endonuclease domain-containing 1 protein OS=Homo sapiens GN=ENDOD1 PE=1 SV=2	SPRR3_HUMAN	0	0	0	0	0	1	2	3	0	0	0	1	5	1	1	2		O94919	1		O94919	1
1	P07711	CATL1_HUMAN	Cathepsin L1 OS=Homo sapiens GN=CTSL PE=1 SV=2	CXAR_HUMAN	0	0	0	1	0	0	2	2	1	0	0	0	5	1	1	2		P07711	1		P07711	1
1	P05164	PERM_HUMAN	Myeloperoxidase OS=Homo sapiens GN=MPO PE=1 SV=1	ANFY1_HUMAN	0	1	1	1	0	0	0	13	0	3	0	0	16	1	1	2		P05164	1		P05164	1
1	Q04756	HGFA_HUMAN	Hepatocyte growth factor activator OS=Homo sapiens GN=HGFAC PE=1 SV=1	PTER_HUMAN	0	0	0	1	0	0	3	0	4	0	0	0	7	1	1	2		Q04756	1		Q04756	1
1	Q96NY7	CLIC6_HUMAN	Chloride intracellular channel protein 6 OS=Homo sapiens GN=CLIC6 PE=2 SV=3	S2611_HUMAN	0	0	0	1	0	0	2	0	1	0	0	0	3	1	1	2		Q96NY7	1		Q96NY7	1
1	Q15831	STK11_HUMAN	Serine/threonine-protein kinase STK11 OS=Homo sapiens GN=STK11 PE=1 SV=1	CD019_HUMAN	0	0	0	0	0	1	0	1	0	2	0	1	3	1	1	2		Q15831	1		Q15831	1
1	P04732	MT1E_HUMAN	Metallothionein-1E OS=Homo sapiens GN=MT1E PE=1 SV=1	GTR9_HUMAN	0	1	0	1	0	1	3	1	1	1	1	1	7	1	1	2		P04732	1		P04732	1
1	O15400	STX7_HUMAN	Syntaxin-7 OS=Homo sapiens GN=STX7 PE=1 SV=4	PGS1_HUMAN	1	0	0	0	0	1	0	1	0	2	1	1	4	1	1	2		O15400	1		O15400	1
1	O14520	AQP7_HUMAN	Aquaporin-7 OS=Homo sapiens GN=AQP7 PE=1 SV=1	SH3G1_HUMAN	0	0	0	1	0	0	0	3	0	0	1	0	4	1	1	2		O14520	1		O14520	1
1	Q9H7P6	MB12B_HUMAN	Multivesicular body subunit 12B OS=Homo sapiens GN=MVB12B PE=1 SV=2	AQR_HUMAN	1	0	1	1	0	0	1	0	1	1	2	0	5	1	1	2		Q9H7P6	1		Q9H7P6	1
1	P46459	NSF_HUMAN	Vesicle-fusing ATPase OS=Homo sapiens GN=NSF PE=1 SV=3	AHNK_HUMAN	0	0	1	0	0	1	2	1	1	0	1	1	5	1	1	2		P46459	1		P46459	1
1	O75674	TM1L1_HUMAN	TOM1-like protein 1 OS=Homo sapiens GN=TOM1L1 PE=1 SV=2	PLCG2_HUMAN	0	0	0	0	0	1	1	1	0	3	0	1	5	1	1	2		O75674	1		O75674	1
1	Q6ZVM7	TM1L2_HUMAN	TOM1-like protein 2 OS=Homo sapiens GN=TOM1L2 PE=1 SV=1	STMN1_HUMAN	0	0	0	0	0	1	2	1	1	0	1	1	5	1	1	2		Q6ZVM7	1		Q6ZVM7	1
1	Q05655	KPCD_HUMAN	Protein kinase C delta type OS=Homo sapiens GN=PRKCD PE=1 SV=2	MALD3_HUMAN	0	0	0	0	0	1	0	0	0	0	3	1	3	1	1	2		Q05655	1		Q05655	1
1	Q6P1N0	C2D1A_HUMAN	Coiled-coil and C2 domain-containing protein 1A OS=Homo sapiens GN=CC2D1A PE=1 SV=1	SC5AB_HUMAN	0	0	1	1	0	0	2	0	0	0	0	0	2	1	1	2		Q6P1N0	1		Q6P1N0	1
1	Q86VE9	SERC5_HUMAN	Serine incorporator 5 OS=Homo sapiens GN=SERINC5 PE=2 SV=1	GSK3A_HUMAN	0	0	1	1	0	0	0	0	1	2	0	0	3	1	1	2		Q86VE9	1		Q86VE9	1
1	P05186	PPBT_HUMAN	Alkaline phosphatase, tissue-nonspecific isozyme OS=Homo sapiens GN=ALPL PE=1 SV=4	ISK1_HUMAN	0	1	1	0	0	0	2	1	1	0	0	0	4	1	1	2		P05186	1		P05186	1
1	P31939	PUR9_HUMAN	Bifunctional purine biosynthesis protein PURH OS=Homo sapiens GN=ATIC PE=1 SV=3	VINC_HUMAN	0	1	1	0	0	1	0	4	0	0	0	1	4	1	1	2		P31939	1		P31939	1
1	Q14847	LASP1_HUMAN	LIM and SH3 domain protein 1 OS=Homo sapiens GN=LASP1 PE=1 SV=2	KPCZ_HUMAN	0	0	0	1	0	0	2	1	0	0	0	0	3	1	1	2		Q14847	1		Q14847	1
1	P50897	PPT1_HUMAN	Palmitoyl-protein thioesterase 1 OS=Homo sapiens GN=PPT1 PE=1 SV=1	RISC_HUMAN	0	0	0	1	0	0	1	2	1	0	0	0	4	1	1	2		P50897	1		P50897	1
1	Q4U2R8	S22A6_HUMAN	Solute carrier family 22 member 6 OS=Homo sapiens GN=SLC22A6 PE=1 SV=1	PKHF1_HUMAN	1	0	0	1	0	0	1	1	0	3	0	0	5	1	1	2		Q4U2R8	1		Q4U2R8	1
1	Q9H0W9	CK054_HUMAN	Ester hydrolase C11orf54 OS=Homo sapiens GN=C11orf54 PE=1 SV=1	PDLI1_HUMAN	0	0	0	0	0	1	0	2	0	1	0	1	3	1	1	2		Q9H0W9	1		Q9H0W9	1
1	P28066	PSA5_HUMAN	Proteasome subunit alpha type-5 OS=Homo sapiens GN=PSMA5 PE=1 SV=3	NSF1C_HUMAN	0	1	0	0	0	0	0	0	0	2	0	0	2	1	1	2		P28066	1		P28066	1
1	P43005	EAA3_HUMAN	Excitatory amino acid transporter 3 OS=Homo sapiens GN=SLC1A1 PE=1 SV=2	ARPC4_HUMAN	0	0	0	0	0	1	0	0	0	7	0	1	7	1	1	2		P43005	1		P43005	1
1	Q96HD9	ACY3_HUMAN	N-acyl-aromatic-L-amino acid amidohydrolase (carboxylate-forming) OS=Homo sapiens GN=ACY3 PE=1 SV=1	VAV3_HUMAN	0	0	0	1	0	0	0	2	0	0	0	0	2	1	1	2		Q96HD9	1		Q96HD9	1
1	Q04609	FOLH1_HUMAN	Glutamate carboxypeptidase 2 OS=Homo sapiens GN=FOLH1 PE=1 SV=1	F102A_HUMAN	0	0	0	0	0	1	0	0	0	3	1	1	4	1	1	2		Q04609	1		Q04609	1
1	Q695T7	S6A19_HUMAN	Sodium-dependent neutral amino acid transporter B(0)AT1 OS=Homo sapiens GN=SLC6A19 PE=1 SV=1	1433S_HUMAN	0	1	0	1	0	0	1	3	0	1	0	0	5	1	1	2		Q695T7	1		Q695T7	1
1	Q9NUM4	T106B_HUMAN	Transmembrane protein 106B OS=Homo sapiens GN=TMEM106B PE=1 SV=2	TGM3_HUMAN	0	0	0	1	0	0	0	0	5	0	1	0	6	1	1	2		Q9NUM4	1		Q9NUM4	1
1	P06241	FYN_HUMAN	Tyrosine-protein kinase Fyn OS=Homo sapiens GN=FYN PE=1 SV=3	LAT2_HUMAN	0	1	0	1	0	0	1	1	2	0	1	0	5	1	1	2		P06241	1		P06241	1
1	P55287	CAD11_HUMAN	Cadherin-11 OS=Homo sapiens GN=CDH11 PE=1 SV=2	US6NL_HUMAN	0	0	1	0	0	0	2	1	1	0	0	0	4	1	1	2		P55287	1		P55287	1
1	O15230	LAMA5_HUMAN	Laminin subunit alpha-5 OS=Homo sapiens GN=LAMA5 PE=1 SV=8	GDIB_HUMAN	0	0	0	1	2	0	0	0	2	0	0	2	2	1	1	2		O15230	1		O15230	1
1	Q8N6Q3	CD177_HUMAN	CD177 antigen OS=Homo sapiens GN=CD177 PE=1 SV=2	PEDF_HUMAN	0	0	0	0	0	1	1	0	3	1	0	1	5	1	1	2		Q8N6Q3	1		Q8N6Q3	1
1	P01700	LV102_HUMAN	Ig lambda chain V-I region HA OS=Homo sapiens PE=1 SV=1	VATC1_HUMAN	0	1	0	1	0	1	1	1	1	1	2	1	6	1	1	2		P01700	1		P01700	1
1	P34059	GALNS_HUMAN	N-acetylgalactosamine-6-sulfatase OS=Homo sapiens GN=GALNS PE=1 SV=1	PDLI5_HUMAN	0	1	0	0	0	0	0	3	0	0	0	0	3	1	1	2		P34059	1		P34059	1
1	Q9UHG2	PCSK1_HUMAN	ProSAAS OS=Homo sapiens GN=PCSK1N PE=1 SV=1	LKHA4_HUMAN	0	0	0	1	0	0	0	0	0	0	2	0	2	1	1	2		Q9UHG2	1		Q9UHG2	1
1	Q9Y5C1	ANGL3_HUMAN	Angiopoietin-related protein 3 OS=Homo sapiens GN=ANGPTL3 PE=1 SV=1	DCDC2_HUMAN	0	1	0	0	0	0	0	1	3	0	0	0	4	1	1	2		Q9Y5C1	1		Q9Y5C1	1
1	Q9HD89	RETN_HUMAN	Resistin OS=Homo sapiens GN=RETN PE=2 SV=1	BRI3_HUMAN	0	0	0	1	0	0	2	1	0	0	1	0	4	1	1	2		Q9HD89	1		Q9HD89	1
1	Q99829	CPNE1_HUMAN	Copine-1 OS=Homo sapiens GN=CPNE1 PE=1 SV=1	CLD3_HUMAN	0	0	0	0	0	1	0	0	0	0	2	1	2	1	1	2		Q99829	1		Q99829	1
1	Q8NCR9	CLRN3_HUMAN	Clarin-3 OS=Homo sapiens GN=CLRN3 PE=2 SV=1	LCK_HUMAN	0	0	0	0	1	1	0	0	0	2	0	2	2	1	1	2		Q8NCR9	1		Q8NCR9	1
1	P61421	VA0D1_HUMAN	V-type proton ATPase subunit d 1 OS=Homo sapiens GN=ATP6V0D1 PE=1 SV=1	OBRG_HUMAN	0	0	0	0	0	1	0	0	0	3	0	1	3	1	1	2		P61421	1		P61421	1
1	Q92542	NICA_HUMAN	Nicastrin OS=Homo sapiens GN=NCSTN PE=1 SV=2	PALM3_HUMAN	0	0	0	0	0	1	0	0	0	2	0	1	2	1	1	2		Q92542	1		Q92542	1
1	Q9BUL8	PDC10_HUMAN	Programmed cell death protein 10 OS=Homo sapiens GN=PDCD10 PE=1 SV=1	BRE1A_HUMAN	1	0	0	0	0	1	0	0	0	2	0	1	2	1	1	2		Q9BUL8	1		Q9BUL8	1
1	P35754	GLRX1_HUMAN	Glutaredoxin-1 OS=Homo sapiens GN=GLRX PE=1 SV=2	RD23B_HUMAN	0	0	0	0	0	1	0	0	0	2	0	1	2	1	1	2		P35754	1		P35754	1
1	Q6UWR7	ENPP6_HUMAN	Ectonucleotide pyrophosphatase/phosphodiesterase family member 6 OS=Homo sapiens GN=ENPP6 PE=1 SV=2	AB17A_HUMAN	0	1	0	0	0	1	0	0	0	2	0	1	2	1	1	2		Q6UWR7	1		Q6UWR7	1
1	O14494	LPP1_HUMAN	Lipid phosphate phosphohydrolase 1 OS=Homo sapiens GN=PPAP2A PE=1 SV=1	VATB2_HUMAN	0	0	0	0	0	1	0	0	0	2	0	1	2	1	1	2		O14494	1		O14494	1
1	P49720	PSB3_HUMAN	Proteasome subunit beta type-3 OS=Homo sapiens GN=PSMB3 PE=1 SV=2	AGM1_HUMAN	0	0	0	0	0	1	0	0	0	4	0	1	4	1	1	2		P49720	1		P49720	1
1	Q14210	LY6D_HUMAN	Lymphocyte antigen 6D OS=Homo sapiens GN=LY6D PE=1 SV=1	UB2V1_HUMAN	0	0	1	0	0	1	2	1	0	0	0	1	3	1	1	2		Q14210	1		Q14210	1
1	Q9NQA5	TRPV5_HUMAN	Transient receptor potential cation channel subfamily V member 5 OS=Homo sapiens GN=TRPV5 PE=1 SV=2	NED4L_HUMAN	0	0	0	0	0	1	0	0	0	2	0	1	2	1	1	2		Q9NQA5	1		Q9NQA5	1
1	Q9HBB8	CDHR5_HUMAN	Cadherin-related family member 5 OS=Homo sapiens GN=CDHR5 PE=1 SV=3	FA21A_HUMAN	0	1	0	1	0	0	0	0	0	3	1	0	4	1	1	2		Q9HBB8	1		Q9HBB8	1
1	P25789	PSA4_HUMAN	Proteasome subunit alpha type-4 OS=Homo sapiens GN=PSMA4 PE=1 SV=1	GSTP1_HUMAN	0	1	0	0	0	0	0	0	0	2	0	0	2	1	1	2		P25789	1		P25789	1
1	P04070	PROC_HUMAN	Vitamin K-dependent protein C OS=Homo sapiens GN=PROC PE=1 SV=1	RBBP9_HUMAN	0	1	0	1	0	0	0	0	2	0	0	0	2	1	1	2		P04070	1		P04070	1
1	P22004	BMP6_HUMAN	Bone morphogenetic protein 6 OS=Homo sapiens GN=BMP6 PE=1 SV=1	SNX11_HUMAN	0	1	0	1	0	0	0	0	2	0	0	0	2	1	1	2		P22004	1		P22004	1
1	O00584	RNT2_HUMAN	Ribonuclease T2 OS=Homo sapiens GN=RNASET2 PE=1 SV=2	ALDR_HUMAN	0	1	0	0	0	0	0	0	0	2	0	0	2	1	1	2		O00584	1		O00584	1
1	P51570	GALK1_HUMAN	Galactokinase OS=Homo sapiens GN=GALK1 PE=1 SV=1	INP5E_HUMAN	0	1	0	0	0	0	0	0	0	2	0	0	2	1	1	2		P51570	1		P51570	1
1	P02747	C1QC_HUMAN	Complement C1q subcomponent subunit C OS=Homo sapiens GN=C1QC PE=1 SV=3	PNKD_HUMAN	0	1	0	0	0	0	0	0	0	3	0	0	3	1	1	2		P02747	1		P02747	1
1	Q7Z7G0	TARSH_HUMAN	Target of Nesh-SH3 OS=Homo sapiens GN=ABI3BP PE=1 SV=1	FLVC2_HUMAN	0	1	0	0	0	0	0	1	2	0	0	0	3	1	1	2		Q7Z7G0	1		Q7Z7G0	1
1	P43652	AFAM_HUMAN	Afamin OS=Homo sapiens GN=AFM PE=1 SV=1	KV309_HUMAN	0	1	0	1	0	0	3	0	0	1	1	0	5	1	1	2		P43652	1		P43652	1
1	P09622	DLDH_HUMAN	Dihydrolipoyl dehydrogenase, mitochondrial OS=Homo sapiens GN=DLD PE=1 SV=2	PVR_HUMAN	0	1	0	0	0	0	0	2	0	0	0	0	2	1	1	2		P09622	1		P09622	1
1	O14493	CLD4_HUMAN	Claudin-4 OS=Homo sapiens GN=CLDN4 PE=1 SV=1	YES_HUMAN	1	0	0	0	0	0	0	0	0	5	0	0	5	1	1	2		O14493	1		O14493	1
1	Q08174	PCDH1_HUMAN	Protocadherin-1 OS=Homo sapiens GN=PCDH1 PE=1 SV=2	T176A_HUMAN	0	0	0	1	0	0	0	4	0	0	0	0	4	1	1	2		Q08174	1		Q08174	1
1	Q9NPG4	PCD12_HUMAN	Protocadherin-12 OS=Homo sapiens GN=PCDH12 PE=2 SV=1	SC5A1_HUMAN	0	0	0	1	0	0	0	3	1	0	0	0	4	1	1	2		Q9NPG4	1		Q9NPG4	1
1	P01616	KV203_HUMAN	Ig kappa chain V-II region MIL OS=Homo sapiens PE=1 SV=1	CING_HUMAN	0	0	0	1	0	0	1	2	0	0	0	0	3	1	1	2		P01616	1		P01616	1
1	P62241	RS8_HUMAN	40S ribosomal protein S8 OS=Homo sapiens GN=RPS8 PE=1 SV=2	TOLIP_HUMAN	0	0	1	0	0	0	0	0	0	0	2	0	2	1	1	2		P62241	1		P62241	1
1	O15118	NPC1_HUMAN	Niemann-Pick C1 protein OS=Homo sapiens GN=NPC1 PE=1 SV=2	HV101_HUMAN	0	0	0	1	0	0	0	0	2	0	1	0	3	1	1	2		O15118	1		O15118	1
1	Q86YQ8	CPNE8_HUMAN	Copine-8 OS=Homo sapiens GN=CPNE8 PE=1 SV=2	XRP2_HUMAN	4	2	0	0	0	5	0	0	0	0	1	5	1	1	1	2		Q86YQ8	1		Q86YQ8	1
1	P01019	ANGT_HUMAN	Angiotensinogen OS=Homo sapiens GN=AGT PE=1 SV=1	TMA7_HUMAN	0	2	0	2	0	2	1	0	0	0	0	2	1	1	1	2		P01019	1		P01019	1
1	P36955	PEDF_HUMAN	Pigment epithelium-derived factor OS=Homo sapiens GN=SERPINF1 PE=1 SV=4	SGF29_HUMAN	2	15	1	2	0	0	0	1	1	1	0	0	3	1	1	2		P36955	1		P36955	1
1	#N/A	B3GN1_HUMAN	N-acetyllactosaminide beta-1,3-N-acetylglucosaminyltransferase OS=Homo sapiens GN=B3GNT1 PE=1 SV=1	GRHPR_HUMAN	0	16	2	5	0	1	1	1	1	0	0	1	3	1	1	2		#N/A	1		#N/A	1
1	O76070	SYUG_HUMAN	Gamma-synuclein OS=Homo sapiens GN=SNCG PE=1 SV=2	LITAF_HUMAN	2	0	3	0	0	1	0	0	0	1	0	1	1	1	1	2		O76070	1		O76070	1
1	Q6V0I7	FAT4_HUMAN	Protocadherin Fat 4 OS=Homo sapiens GN=FAT4 PE=1 SV=2	TETN_HUMAN	0	22	1	10	0	0	0	0	1	0	0	0	1	1	1	2		Q6V0I7	1		Q6V0I7	1
1	Q9H1C7	CYTM1_HUMAN	Cysteine-rich and transmembrane domain-containing protein 1 OS=Homo sapiens GN=CYSTM1 PE=1 SV=1	HRG1_HUMAN	2	0	1	0	0	2	0	0	0	1	1	2	2	1	1	2		Q9H1C7	1		Q9H1C7	1
1	P19835	CEL_HUMAN	Bile salt-activated lipase OS=Homo sapiens GN=CEL PE=1 SV=3	CATC_HUMAN	0	14	0	3	0	0	0	0	1	1	0	0	2	1	1	2		P19835	1		P19835	1
1	Q13591	SEM5A_HUMAN	Semaphorin-5A OS=Homo sapiens GN=SEMA5A PE=1 SV=3	CBPM_HUMAN	0	5	1	2	0	0	1	1	1	0	0	0	3	1	1	2		Q13591	1		Q13591	1
1	Q15847	ADIRF_HUMAN	Adipogenesis regulatory factor OS=Homo sapiens GN=ADIRF PE=1 SV=1	GNAZ_HUMAN	2	0	0	0	0	2	0	0	0	1	0	2	1	1	1	2		Q15847	1		Q15847	1
1	P49327	FAS_HUMAN	Fatty acid synthase OS=Homo sapiens GN=FASN PE=1 SV=3	DDC_HUMAN	0	0	3	0	0	35	1	0	0	0	0	35	1	1	1	2		P49327	1		P49327	1
1	P05452	TETN_HUMAN	Tetranectin OS=Homo sapiens GN=CLEC3B PE=1 SV=3	NCK2_HUMAN	0	5	1	3	0	0	1	0	0	0	1	0	2	1	1	2		P05452	1		P05452	1
1	Q16706	MA2A1_HUMAN	Alpha-mannosidase 2 OS=Homo sapiens GN=MAN2A1 PE=1 SV=2	KV204_HUMAN	0	9	0	2	0	0	0	1	1	0	0	0	2	1	1	2		Q16706	1		Q16706	1
1	O15197	EPHB6_HUMAN	Ephrin type-B receptor 6 OS=Homo sapiens GN=EPHB6 PE=1 SV=4	IPYR_HUMAN	0	3	2	1	0	0	0	1	0	0	0	0	1	1	1	2		O15197	1		O15197	1
1	Q9Y2T3	GUAD_HUMAN	Guanine deaminase OS=Homo sapiens GN=GDA PE=1 SV=1	RUSD2_HUMAN	0	5	0	2	0	0	0	1	0	1	0	0	2	1	1	2		Q9Y2T3	1		Q9Y2T3	1
1	P07357	CO8A_HUMAN	Complement component C8 alpha chain OS=Homo sapiens GN=C8A PE=1 SV=2	A1AT_HUMAN	0	5	0	4	2	0	0	1	1	1	0	2	3	1	1	2		P07357	1		P07357	1
1	O95154	ARK73_HUMAN	Aflatoxin B1 aldehyde reductase member 3 OS=Homo sapiens GN=AKR7A3 PE=1 SV=2	DTX3L_HUMAN	0	4	0	2	0	0	0	1	0	0	0	0	1	1	1	2		O95154	1		O95154	1
1	P15291	B4GT1_HUMAN	Beta-1,4-galactosyltransferase 1 OS=Homo sapiens GN=B4GALT1 PE=1 SV=5	MA2A1_HUMAN	0	13	1	3	0	0	0	0	1	0	0	0	1	1	1	2		P15291	1		P15291	1
1	Q14894	CRYM_HUMAN	Ketimine reductase mu-crystallin OS=Homo sapiens GN=CRYM PE=1 SV=1	SERC2_HUMAN	2	7	1	1	0	1	1	1	0	0	1	1	3	1	1	2		Q14894	1		Q14894	1
1	Q08345	DDR1_HUMAN	Epithelial discoidin domain-containing receptor 1 OS=Homo sapiens GN=DDR1 PE=1 SV=1	SMIM5_HUMAN	0	5	0	2	0	0	0	1	1	0	0	0	2	1	1	2		Q08345	1		Q08345	1
1	O14498	ISLR_HUMAN	Immunoglobulin superfamily containing leucine-rich repeat protein OS=Homo sapiens GN=ISLR PE=1 SV=1	TMEM2_HUMAN	0	6	0	2	0	1	0	1	0	0	0	1	1	1	1	2		O14498	1		O14498	1
1	Q14703	MBTP1_HUMAN	Membrane-bound transcription factor site-1 protease OS=Homo sapiens GN=MBTPS1 PE=1 SV=1	RALA_HUMAN	0	4	0	2	0	0	1	1	1	0	0	0	3	1	1	2		Q14703	1		Q14703	1
1	Q6P9A2	GLT18_HUMAN	Polypeptide N-acetylgalactosaminyltransferase 18 OS=Homo sapiens GN=GALNT18 PE=2 SV=2	CYTB_HUMAN	0	9	0	3	0	0	0	1	1	0	0	0	2	1	1	2		Q6P9A2	1		Q6P9A2	1
1	P11717	MPRI_HUMAN	Cation-independent mannose-6-phosphate receptor OS=Homo sapiens GN=IGF2R PE=1 SV=3	K1522_HUMAN	0	2	0	2	0	0	0	0	0	1	0	0	1	1	1	2		P11717	1		P11717	1
1	P11766	ADHX_HUMAN	Alcohol dehydrogenase class-3 OS=Homo sapiens GN=ADH5 PE=1 SV=4	HPT_HUMAN	0	6	0	0	4	4	0	0	0	1	0	8	1	1	1	2		P11766	1		P11766	1
1	Q15485	FCN2_HUMAN	Ficolin-2 OS=Homo sapiens GN=FCN2 PE=1 SV=2	SHRM3_HUMAN	0	2	0	2	0	0	0	1	0	0	0	0	1	1	1	2		Q15485	1		Q15485	1
1	Q8WVN6	SCTM1_HUMAN	Secreted and transmembrane protein 1 OS=Homo sapiens GN=SECTM1 PE=1 SV=2	NIBL1_HUMAN	0	3	0	9	0	1	1	1	1	0	1	1	4	1	1	2		Q8WVN6	1		Q8WVN6	1
1	Q8WVQ1	CANT1_HUMAN	Soluble calcium-activated nucleotidase 1 OS=Homo sapiens GN=CANT1 PE=1 SV=1	GDIR2_HUMAN	0	3	0	2	0	0	1	0	0	0	0	0	1	1	1	2		Q8WVQ1	1		Q8WVQ1	1
1	Q96A08	H2B1A_HUMAN	Histone H2B type 1-A OS=Homo sapiens GN=HIST1H2BA PE=1 SV=3	SPB4_HUMAN	3	0	0	0	0	2	0	1	1	0	0	2	2	1	1	2		Q96A08	1		Q96A08	1
1	P37837	TALDO_HUMAN	Transaldolase OS=Homo sapiens GN=TALDO1 PE=1 SV=2	GIPC2_HUMAN	0	2	0	2	0	0	1	1	0	0	0	0	2	1	1	2		P37837	1		P37837	1
1	Q6XQN6	PNCB_HUMAN	Nicotinate phosphoribosyltransferase OS=Homo sapiens GN=NAPRT PE=1 SV=2	PMGT1_HUMAN	1	4	0	2	0	1	0	1	0	0	0	1	1	1	1	2		Q6XQN6	1		Q6XQN6	1
1	P31944	CASPE_HUMAN	Caspase-14 OS=Homo sapiens GN=CASP14 PE=1 SV=2	VDAC1_HUMAN	1	2	0	2	1	0	0	1	0	0	0	1	1	1	1	2		P31944	1		P31944	1
1	Q96DA0	ZG16B_HUMAN	Zymogen granule protein 16 homolog B OS=Homo sapiens GN=ZG16B PE=1 SV=3	KSYK_HUMAN	0	6	0	0	0	5	0	0	0	1	0	5	1	1	1	2		Q96DA0	1		Q96DA0	1
1	P50502	F10A1_HUMAN	Hsc70-interacting protein OS=Homo sapiens GN=ST13 PE=1 SV=2	S17A5_HUMAN	1	2	0	0	0	3	0	0	0	1	0	3	1	1	1	2		P50502	1		P50502	1
1	Q9HCY8	S10AE_HUMAN	Protein S100-A14 OS=Homo sapiens GN=S100A14 PE=1 SV=1	TSN3_HUMAN	1	2	0	0	0	2	0	1	0	0	0	2	1	1	1	2		Q9HCY8	1		Q9HCY8	1
1	P51654	GPC3_HUMAN	Glypican-3 OS=Homo sapiens GN=GPC3 PE=1 SV=1	MSRA_HUMAN	0	16	0	2	0	0	0	1	0	0	0	0	1	1	1	2		P51654	1		P51654	1
1	Q14697	GANAB_HUMAN	Neutral alpha-glucosidase AB OS=Homo sapiens GN=GANAB PE=1 SV=3	RN150_HUMAN	0	6	0	5	0	0	0	0	1	0	0	0	1	1	1	2		Q14697	1		Q14697	1
1	P01112	RASH_HUMAN	GTPase HRas OS=Homo sapiens GN=HRAS PE=1 SV=1	NPT2B_HUMAN	1	0	1	0	0	2	0	0	0	0	1	2	1	1	1	2		P01112	1		P01112	1
1	P63027	VAMP2_HUMAN	Vesicle-associated membrane protein 2 OS=Homo sapiens GN=VAMP2 PE=1 SV=3	GSTT1_HUMAN	0	0	0	1	0	2	1	1	0	0	1	2	3	1	1	2		P63027	1		P63027	1
1	Q9UM54	MYO6_HUMAN	Unconventional myosin-VI OS=Homo sapiens GN=MYO6 PE=1 SV=4	SNX27_HUMAN	0	0	0	0	0	3	0	0	0	1	0	3	1	1	1	2		Q9UM54	1		Q9UM54	1
1	Q9UJU6	DBNL_HUMAN	Drebrin-like protein OS=Homo sapiens GN=DBNL PE=1 SV=1	DNAS1_HUMAN	0	0	0	2	2	0	0	1	1	0	0	2	2	1	1	2		Q9UJU6	1		Q9UJU6	1
1	Q7L576	CYFP1_HUMAN	Cytoplasmic FMR1-interacting protein 1 OS=Homo sapiens GN=CYFIP1 PE=1 SV=1	BAP31_HUMAN	0	0	0	0	0	2	0	0	0	1	1	2	2	1	1	2		Q7L576	1		Q7L576	1
1	O43598	DNPH1_HUMAN	2~-deoxynucleoside 5~-phosphate N-hydrolase 1 OS=Homo sapiens GN=DNPH1 PE=1 SV=1	SETB1_HUMAN	0	2	0	0	0	0	0	0	0	1	0	0	1	1	1	2		O43598	1		O43598	1
1	Q9BV40	VAMP8_HUMAN	Vesicle-associated membrane protein 8 OS=Homo sapiens GN=VAMP8 PE=1 SV=1	LIN7A_HUMAN	0	0	1	0	0	4	1	0	1	0	1	4	3	1	1	2		Q9BV40	1		Q9BV40	1
1	O75223	GGCT_HUMAN	Gamma-glutamylcyclotransferase OS=Homo sapiens GN=GGCT PE=1 SV=1	ARH37_HUMAN	1	0	0	0	0	3	0	0	0	0	1	3	1	1	1	2		O75223	1		O75223	1
1	Q9H299	SH3L3_HUMAN	SH3 domain-binding glutamic acid-rich-like protein 3 OS=Homo sapiens GN=SH3BGRL3 PE=1 SV=1	CD248_HUMAN	1	0	0	0	1	3	1	0	1	0	0	4	2	1	1	2		Q9H299	1		Q9H299	1
1	O95834	EMAL2_HUMAN	Echinoderm microtubule-associated protein-like 2 OS=Homo sapiens GN=EML2 PE=1 SV=1	TAF1L_HUMAN	0	0	0	0	0	2	0	1	0	0	0	2	1	1	1	2		O95834	1		O95834	1
1	Q8NHG7	SVIP_HUMAN	Small VCP/p97-interacting protein OS=Homo sapiens GN=SVIP PE=3 SV=1	VAS1_HUMAN	2	0	1	1	0	0	0	0	0	0	1	0	1	1	1	2		Q8NHG7	1		Q8NHG7	1
1	Q96QE2	MYCT_HUMAN	Proton myo-inositol cotransporter OS=Homo sapiens GN=SLC2A13 PE=1 SV=3	ITCH_HUMAN	0	0	0	2	0	0	1	1	1	1	1	0	5	1	1	2		Q96QE2	1		Q96QE2	1
1	Q8N695	SC5A8_HUMAN	Sodium-coupled monocarboxylate transporter 1 OS=Homo sapiens GN=SLC5A8 PE=1 SV=2	CATB_HUMAN	0	0	1	2	2	0	1	0	1	1	0	2	3	1	1	2		Q8N695	1		Q8N695	1
1	Q9H008	LHPP_HUMAN	Phospholysine phosphohistidine inorganic pyrophosphate phosphatase OS=Homo sapiens GN=LHPP PE=1 SV=2	AP1B1_HUMAN	0	4	0	1	0	0	1	0	0	1	0	0	2	1	1	2		Q9H008	1		Q9H008	1
1	Q9UL25	RAB21_HUMAN	Ras-related protein Rab-21 OS=Homo sapiens GN=RAB21 PE=1 SV=3	LYPA1_HUMAN	0	0	2	0	0	0	1	0	0	1	0	0	2	1	1	2		Q9UL25	1		Q9UL25	1
1	P62942	FKB1A_HUMAN	Peptidyl-prolyl cis-trans isomerase FKBP1A OS=Homo sapiens GN=FKBP1A PE=1 SV=2	HMCN1_HUMAN	0	0	1	2	2	1	1	1	1	0	1	3	4	1	1	2		P62942	1		P62942	1
1	P28838	AMPL_HUMAN	Cytosol aminopeptidase OS=Homo sapiens GN=LAP3 PE=1 SV=3	PLD3_HUMAN	0	7	0	1	0	0	1	0	0	1	0	0	2	1	1	2		P28838	1		P28838	1
1	P54920	SNAA_HUMAN	Alpha-soluble NSF attachment protein OS=Homo sapiens GN=NAPA PE=1 SV=3	ARL8B_HUMAN	0	0	0	0	0	6	1	0	0	1	0	6	2	1	1	2		P54920	1		P54920	1
1	Q14019	COTL1_HUMAN	Coactosin-like protein OS=Homo sapiens GN=COTL1 PE=1 SV=3	G6PI_HUMAN	0	2	0	0	0	0	1	0	0	0	0	0	1	1	1	2		Q14019	1		Q14019	1
1	P21980	TGM2_HUMAN	Protein-glutamine gamma-glutamyltransferase 2 OS=Homo sapiens GN=TGM2 PE=1 SV=2	S6A19_HUMAN	0	0	0	0	0	5	0	0	0	1	0	5	1	1	1	2		P21980	1		P21980	1
1	P10768	ESTD_HUMAN	S-formylglutathione hydrolase OS=Homo sapiens GN=ESD PE=1 SV=2	T106B_HUMAN	0	10	0	0	0	1	0	1	0	1	0	1	2	1	1	2		P10768	1		P10768	1
1	P14649	MYL6B_HUMAN	Myosin light chain 6B OS=Homo sapiens GN=MYL6B PE=1 SV=1	CO3_HUMAN	0	0	2	0	12	0	0	0	0	0	1	12	1	1	1	2		P14649	1		P14649	1
1	Q96RF0	SNX18_HUMAN	Sorting nexin-18 OS=Homo sapiens GN=SNX18 PE=1 SV=2	PGRP2_HUMAN	0	0	2	0	1	1	0	0	0	1	1	2	2	1	1	2		Q96RF0	1		Q96RF0	1
1	Q96BW5	PTER_HUMAN	Phosphotriesterase-related protein OS=Homo sapiens GN=PTER PE=1 SV=1	K1C10_HUMAN	0	3	0	0	6	0	0	0	1	1	0	6	2	1	1	2		Q96BW5	1		Q96BW5	1
1	P18206	VINC_HUMAN	Vinculin OS=Homo sapiens GN=VCL PE=1 SV=4	CFAI_HUMAN	0	0	1	1	0	2	1	1	1	0	1	2	4	1	1	2		P18206	1		P18206	1
1	P09960	LKHA4_HUMAN	Leukotriene A-4 hydrolase OS=Homo sapiens GN=LTA4H PE=1 SV=2	CATD_HUMAN	0	7	0	1	4	1	1	1	1	0	0	5	3	1	1	2		P09960	1		P09960	1
1	O15551	CLD3_HUMAN	Claudin-3 OS=Homo sapiens GN=CLDN3 PE=1 SV=1	R4RL2_HUMAN	0	0	0	0	0	3	0	0	1	0	0	3	1	1	1	2		O15551	1		O15551	1
1	P54727	RD23B_HUMAN	UV excision repair protein RAD23 homolog B OS=Homo sapiens GN=RAD23B PE=1 SV=1	AGRIN_HUMAN	0	0	0	0	0	2	1	0	0	0	0	2	1	1	1	2		P54727	1		P54727	1
1	P15121	ALDR_HUMAN	Aldose reductase OS=Homo sapiens GN=AKR1B1 PE=1 SV=3	FINC_HUMAN	0	2	0	0	1	1	1	0	1	0	0	2	2	1	1	2		P15121	1		P15121	1
1	P07947	YES_HUMAN	Tyrosine-protein kinase Yes OS=Homo sapiens GN=YES1 PE=1 SV=3	FHR1_HUMAN	0	0	0	0	0	3	0	0	0	1	0	3	1	1	1	2		P07947	1		P07947	1
1	Q71RC9	SMIM5_HUMAN	Small integral membrane protein 5 OS=Homo sapiens GN=SMIM5 PE=4 SV=2	TSP1_HUMAN	2	0	1	1	4	1	1	0	1	0	1	5	3	1	1	2		Q71RC9	1		Q71RC9	1
1	Q96TA1	NIBL1_HUMAN	Niban-like protein 1 OS=Homo sapiens GN=FAM129B PE=1 SV=3	CD14_HUMAN	0	0	0	0	2	2	0	0	0	1	0	4	1	1	1	2		Q96TA1	1		Q96TA1	1
1	P81605	DCD_HUMAN	Dermcidin OS=Homo sapiens GN=DCD PE=1 SV=2	FBLN3_HUMAN	3	0	0	0	7	1	0	0	0	0	1	8	1	1	1	2		P81605	1		P81605	1
1	A8K2U0	A2ML1_HUMAN	Alpha-2-macroglobulin-like protein 1 OS=Homo sapiens GN=A2ML1 PE=1 SV=3	FILA_HUMAN	0	40	1	1	0	0	0	1	0	0	0	0	1	1	1	2		A8K2U0	1		A8K2U0	1
1	P61160	ARP2_HUMAN	Actin-related protein 2 OS=Homo sapiens GN=ACTR2 PE=1 SV=1	CRNN_HUMAN	0	3	0	1	0	0	0	1	0	0	0	0	1	1	1	2		P61160	1		P61160	1
1	Q8N6F1	CLD19_HUMAN	Claudin-19 OS=Homo sapiens GN=CLDN19 PE=1 SV=2	PTGDS_HUMAN	1	0	1	1	4	2	0	0	0	0	1	6	1	1	1	2		Q8N6F1	1		Q8N6F1	1
1	P51153	RAB13_HUMAN	Ras-related protein Rab-13 OS=Homo sapiens GN=RAB13 PE=1 SV=1	ROBO4_HUMAN	0	0	1	0	2	6	1	1	0	0	0	8	2	1	1	2		P51153	1		P51153	1
1	P01780	HV319_HUMAN	Ig heavy chain V-III region JON OS=Homo sapiens PE=1 SV=1	LTBP2_HUMAN	0	2	0	0	0	0	0	1	0	0	1	0	2	1	1	2		P01780	1		P01780	1
1	O75503	CLN5_HUMAN	Ceroid-lipofuscinosis neuronal protein 5 OS=Homo sapiens GN=CLN5 PE=1 SV=2	LYNX1_HUMAN	0	3	0	1	1	0	0	0	1	0	0	1	1	1	1	2		O75503	1		O75503	1
1	Q9BTY2	FUCO2_HUMAN	Plasma alpha-L-fucosidase OS=Homo sapiens GN=FUCA2 PE=1 SV=2	CERU_HUMAN	0	2	0	0	6	0	0	1	0	0	0	6	1	1	1	2		Q9BTY2	1		Q9BTY2	1
1	P16870	CBPE_HUMAN	Carboxypeptidase E OS=Homo sapiens GN=CPE PE=1 SV=1	HS71L_HUMAN	0	5	0	1	0	1	1	0	1	0	0	1	2	1	1	2		P16870	1		P16870	1
1	Q8NFY4	SEM6D_HUMAN	Semaphorin-6D OS=Homo sapiens GN=SEMA6D PE=2 SV=1	IBP2_HUMAN	0	4	0	0	0	0	0	0	1	0	0	0	1	1	1	2		Q8NFY4	1		Q8NFY4	1
1	Q8N9U0	TAC2N_HUMAN	Tandem C2 domains nuclear protein OS=Homo sapiens GN=TC2N PE=1 SV=2	AATC_HUMAN	0	0	0	0	0	4	1	0	0	0	0	4	1	1	1	2		Q8N9U0	1		Q8N9U0	1
1	Q9P2B2	FPRP_HUMAN	Prostaglandin F2 receptor negative regulator OS=Homo sapiens GN=PTGFRN PE=1 SV=2	NUCB1_HUMAN	0	1	0	2	0	0	0	1	0	0	1	0	2	1	1	2		Q9P2B2	1		Q9P2B2	1
1	P01130	LDLR_HUMAN	Low-density lipoprotein receptor OS=Homo sapiens GN=LDLR PE=1 SV=1	MXRA5_HUMAN	1	0	0	1	0	2	1	0	0	0	0	2	1	1	1	2		P01130	1		P01130	1
1	Q8N436	CPXM2_HUMAN	Inactive carboxypeptidase-like protein X2 OS=Homo sapiens GN=CPXM2 PE=2 SV=3	UROK_HUMAN	0	2	0	1	0	0	0	0	1	0	0	0	1	1	1	2		Q8N436	1		Q8N436	1
1	P15924	DESP_HUMAN	Desmoplakin OS=Homo sapiens GN=DSP PE=1 SV=3	SPHM_HUMAN	0	2	0	0	0	0	0	1	0	0	0	0	1	1	1	2		P15924	1		P15924	1
1	P52788	SPSY_HUMAN	Spermine synthase OS=Homo sapiens GN=SMS PE=1 SV=2	PLMN_HUMAN	0	0	0	0	0	2	1	0	0	0	0	2	1	1	1	2		P52788	1		P52788	1
1	Q86X29	LSR_HUMAN	Lipolysis-stimulated lipoprotein receptor OS=Homo sapiens GN=LSR PE=1 SV=4	K1C14_HUMAN	0	2	0	0	0	0	0	1	0	0	0	0	1	1	1	2		Q86X29	1		Q86X29	1
1	Q9BYD5	CNFN_HUMAN	Cornifelin OS=Homo sapiens GN=CNFN PE=1 SV=2	EPHB6_HUMAN	0	2	0	0	0	0	0	1	0	0	0	0	1	1	1	2		Q9BYD5	1		Q9BYD5	1
1	Q9UN70	PCDGK_HUMAN	Protocadherin gamma-C3 OS=Homo sapiens GN=PCDHGC3 PE=1 SV=1	FETUA_HUMAN	0	2	1	1	0	0	1	1	1	0	0	0	3	1	1	2		Q9UN70	1		Q9UN70	1
1	P25815	S100P_HUMAN	Protein S100-P OS=Homo sapiens GN=S100P PE=1 SV=2	MTPN_HUMAN	1	1	0	0	0	3	0	0	0	1	0	3	1	1	1	2		P25815	1		P25815	1
1	P57735	RAB25_HUMAN	Ras-related protein Rab-25 OS=Homo sapiens GN=RAB25 PE=1 SV=2	TENX_HUMAN	0	0	0	0	0	6	0	0	0	1	0	6	1	1	1	2		P57735	1		P57735	1
1	P01040	CYTA_HUMAN	Cystatin-A OS=Homo sapiens GN=CSTA PE=1 SV=1	IGHG2_HUMAN	0	0	0	0	4	4	0	0	0	1	0	8	1	1	1	2		P01040	1		P01040	1
1	P05026	AT1B1_HUMAN	Sodium/potassium-transporting ATPase subunit beta-1 OS=Homo sapiens GN=ATP1B1 PE=1 SV=1	K22E_HUMAN	0	1	0	0	3	2	1	0	0	1	0	5	2	1	1	2		P05026	1		P05026	1
1	P11216	PYGB_HUMAN	Glycogen phosphorylase, brain form OS=Homo sapiens GN=PYGB PE=1 SV=5	OAF_HUMAN	0	0	0	0	0	5	0	0	0	1	0	5	1	1	1	2		P11216	1		P11216	1
1	P30153	2AAA_HUMAN	Serine/threonine-protein phosphatase 2A 65 kDa regulatory subunit A alpha isoform OS=Homo sapiens GN=PPP2R1A PE=1 SV=4	AMPE_HUMAN	0	3	0	0	0	1	0	0	0	1	0	1	1	1	1	2		P30153	1		P30153	1
1	Q8N9N7	LRC57_HUMAN	Leucine-rich repeat-containing protein 57 OS=Homo sapiens GN=LRRC57 PE=1 SV=1	K2C6B_HUMAN	0	0	0	0	0	2	0	0	0	1	0	2	1	1	1	2		Q8N9N7	1		Q8N9N7	1
1	P53396	ACLY_HUMAN	ATP-citrate synthase OS=Homo sapiens GN=ACLY PE=1 SV=3	ITIH1_HUMAN	0	0	0	0	0	3	0	0	0	1	0	3	1	1	1	2		P53396	1		P53396	1
1	P17987	TCPA_HUMAN	T-complex protein 1 subunit alpha OS=Homo sapiens GN=TCP1 PE=1 SV=1	ATNG_HUMAN	0	0	0	0	0	3	0	0	1	1	0	3	2	1	1	2		P17987	1		P17987	1
1	O60701	UGDH_HUMAN	UDP-glucose 6-dehydrogenase OS=Homo sapiens GN=UGDH PE=1 SV=1	PVRL4_HUMAN	0	1	0	0	0	3	0	0	0	1	0	3	1	1	1	2		O60701	1		O60701	1
1	Q96FW1	OTUB1_HUMAN	Ubiquitin thioesterase OTUB1 OS=Homo sapiens GN=OTUB1 PE=1 SV=2	NPT4_HUMAN	0	3	0	1	0	1	1	0	0	1	0	1	2	1	1	2		Q96FW1	1		Q96FW1	1
1	Q96H20	SNF8_HUMAN	Vacuolar-sorting protein SNF8 OS=Homo sapiens GN=SNF8 PE=1 SV=1	SIRBL_HUMAN	0	0	0	0	0	2	0	0	0	1	0	2	1	1	1	2		Q96H20	1		Q96H20	1
1	P01771	HV310_HUMAN	Ig heavy chain V-III region HIL OS=Homo sapiens PE=1 SV=1	FIBB_HUMAN	0	1	0	1	0	2	1	1	0	0	0	2	2	1	1	2		P01771	1		P01771	1
1	Q14204	DYHC1_HUMAN	Cytoplasmic dynein 1 heavy chain 1 OS=Homo sapiens GN=DYNC1H1 PE=1 SV=5	PHP14_HUMAN	0	0	0	0	0	2	0	0	0	1	0	2	1	1	1	2		Q14204	1		Q14204	1
1	O43865	SAHH2_HUMAN	Putative adenosylhomocysteinase 2 OS=Homo sapiens GN=AHCYL1 PE=1 SV=2	LV301_HUMAN	0	0	0	0	4	4	0	0	0	1	0	8	1	1	1	2		O43865	1		O43865	1
1	Q9H3S7	PTN23_HUMAN	Tyrosine-protein phosphatase non-receptor type 23 OS=Homo sapiens GN=PTPN23 PE=1 SV=1	COFA1_HUMAN	0	0	0	0	0	2	0	0	0	1	0	2	1	1	1	2		Q9H3S7	1		Q9H3S7	1
1	Q15349	KS6A2_HUMAN	Ribosomal protein S6 kinase alpha-2 OS=Homo sapiens GN=RPS6KA2 PE=1 SV=2	PDGFD_HUMAN	0	0	0	0	0	2	0	0	0	1	0	2	1	1	1	2		Q15349	1		Q15349	1
1	O95998	I18BP_HUMAN	Interleukin-18-binding protein OS=Homo sapiens GN=IL18BP PE=1 SV=2	PGDH_HUMAN	0	0	0	2	0	1	0	0	0	0	1	1	1	1	1	2		O95998	1		O95998	1
1	Q9UNW1	MINP1_HUMAN	Multiple inositol polyphosphate phosphatase 1 OS=Homo sapiens GN=MINPP1 PE=1 SV=1	QSOX1_HUMAN	0	9	0	1	2	0	0	0	1	0	0	2	1	1	1	2		Q9UNW1	1		Q9UNW1	1
1	Q9UL52	TM11E_HUMAN	Transmembrane protease serine 11E OS=Homo sapiens GN=TMPRSS11E PE=1 SV=2	AACT_HUMAN	0	8	0	0	1	0	0	1	0	0	0	1	1	1	1	2		Q9UL52	1		Q9UL52	1
1	P32754	HPPD_HUMAN	4-hydroxyphenylpyruvate dioxygenase OS=Homo sapiens GN=HPD PE=1 SV=2	GSLG1_HUMAN	0	11	0	0	0	0	0	0	0	1	0	0	1	1	1	2		P32754	1		P32754	1
1	P49862	KLK7_HUMAN	Kallikrein-7 OS=Homo sapiens GN=KLK7 PE=1 SV=1	K2C5_HUMAN	0	5	0	0	0	0	0	1	0	0	0	0	1	1	1	2		P49862	1		P49862	1
1	P02545	LMNA_HUMAN	Prelamin-A/C OS=Homo sapiens GN=LMNA PE=1 SV=1	S22A2_HUMAN	0	6	0	1	0	0	0	0	1	0	0	0	1	1	1	2		P02545	1		P02545	1
1	P61457	PHS_HUMAN	Pterin-4-alpha-carbinolamine dehydratase OS=Homo sapiens GN=PCBD1 PE=1 SV=2	B3GN1_HUMAN	0	2	0	0	0	0	0	0	0	1	0	0	1	1	1	2		P61457	1		P61457	1
1	Q99519	NEUR1_HUMAN	Sialidase-1 OS=Homo sapiens GN=NEU1 PE=1 SV=1	KPYR_HUMAN	0	4	0	1	0	0	0	1	0	0	0	0	1	1	1	2		Q99519	1		Q99519	1
1	Q8NCC3	PAG15_HUMAN	Group XV phospholipase A2 OS=Homo sapiens GN=PLA2G15 PE=1 SV=2	BOLA2_HUMAN	0	4	0	0	0	0	0	1	0	0	0	0	1	1	1	2		Q8NCC3	1		Q8NCC3	1
1	Q9H1E1	RNAS7_HUMAN	Ribonuclease 7 OS=Homo sapiens GN=RNASE7 PE=1 SV=2	CO6A3_HUMAN	0	6	0	0	2	0	0	1	0	0	0	2	1	1	1	2		Q9H1E1	1		Q9H1E1	1
1	P28332	ADH6_HUMAN	Alcohol dehydrogenase 6 OS=Homo sapiens GN=ADH6 PE=2 SV=2	TRHDE_HUMAN	0	5	0	1	0	0	0	0	0	1	0	0	1	1	1	2		P28332	1		P28332	1
1	P20618	PSB1_HUMAN	Proteasome subunit beta type-1 OS=Homo sapiens GN=PSMB1 PE=1 SV=2	ZA2G_HUMAN	0	4	0	0	1	0	0	0	0	1	0	1	1	1	1	2		P20618	1		P20618	1
1	P09237	MMP7_HUMAN	Matrilysin OS=Homo sapiens GN=MMP7 PE=1 SV=1	PTPRS_HUMAN	0	2	0	1	0	0	0	0	0	1	0	0	1	1	1	2		P09237	1		P09237	1
1	Q14956	GPNMB_HUMAN	Transmembrane glycoprotein NMB OS=Homo sapiens GN=GPNMB PE=1 SV=2	EPHB2_HUMAN	0	4	0	0	0	0	0	0	0	1	0	0	1	1	1	2		Q14956	1		Q14956	1
1	Q13126	MTAP_HUMAN	S-methyl-5~-thioadenosine phosphorylase OS=Homo sapiens GN=MTAP PE=1 SV=2	GUAD_HUMAN	0	2	0	0	0	0	0	1	0	0	0	0	1	1	1	2		Q13126	1		Q13126	1
1	P09668	CATH_HUMAN	Pro-cathepsin H OS=Homo sapiens GN=CTSH PE=1 SV=4	ASM3B_HUMAN	0	4	0	1	0	0	0	1	0	1	0	0	2	1	1	2		P09668	1		P09668	1
1	Q14118	DAG1_HUMAN	Dystroglycan OS=Homo sapiens GN=DAG1 PE=1 SV=2	6PGL_HUMAN	0	2	0	1	1	0	1	0	0	0	0	1	1	1	1	2		Q14118	1		Q14118	1
1	P12532	KCRU_HUMAN	Creatine kinase U-type, mitochondrial OS=Homo sapiens GN=CKMT1A PE=1 SV=1	FILA2_HUMAN	0	2	0	0	0	0	0	1	0	0	0	0	1	1	1	2		P12532	1		P12532	1
1	Q9HC38	GLOD4_HUMAN	Glyoxalase domain-containing protein 4 OS=Homo sapiens GN=GLOD4 PE=1 SV=1	DCD_HUMAN	0	2	0	0	0	0	0	0	0	1	0	0	1	1	1	2		Q9HC38	1		Q9HC38	1
1	Q24JP5	T132A_HUMAN	Transmembrane protein 132A OS=Homo sapiens GN=TMEM132A PE=2 SV=1	CO5_HUMAN	0	3	0	0	0	0	0	0	1	0	0	0	1	1	1	2		Q24JP5	1		Q24JP5	1
1	P11597	CETP_HUMAN	Cholesteryl ester transfer protein OS=Homo sapiens GN=CETP PE=1 SV=2	CO8A_HUMAN	0	1	0	2	0	0	0	0	1	1	0	0	2	1	1	2		P11597	1		P11597	1
1	Q9BRK5	CAB45_HUMAN	45 kDa calcium-binding protein OS=Homo sapiens GN=SDF4 PE=1 SV=1	EPHB4_HUMAN	0	1	1	3	0	0	1	1	0	0	0	0	2	1	1	2		Q9BRK5	1		Q9BRK5	1
1	O75339	CILP1_HUMAN	Cartilage intermediate layer protein 1 OS=Homo sapiens GN=CILP PE=1 SV=4	ARK73_HUMAN	0	0	0	3	0	0	0	1	1	0	0	0	2	1	1	2		O75339	1		O75339	1
1	P02753	RET4_HUMAN	Retinol-binding protein 4 OS=Homo sapiens GN=RBP4 PE=1 SV=3	GSHB_HUMAN	0	0	1	2	0	0	1	1	1	0	0	0	3	1	1	2		P02753	1		P02753	1
1	P08519	APOA_HUMAN	Apolipoprotein(a) OS=Homo sapiens GN=LPA PE=1 SV=1	SPRL1_HUMAN	0	0	2	1	0	0	1	0	1	0	0	0	2	1	1	2		P08519	1		P08519	1
1	P08238	HS90B_HUMAN	Heat shock protein HSP 90-beta OS=Homo sapiens GN=HSP90AB1 PE=1 SV=4	A2ML1_HUMAN	7	10	5	0	0	16	0	0	0	0	0	16	0	1	0	1		P08238	1		O00476	1
1	P02538	K2C6A_HUMAN	Keratin, type II cytoskeletal 6A OS=Homo sapiens GN=KRT6A PE=1 SV=3	GNAS1_HUMAN	10	0	2	2	0	0	0	0	0	0	0	0	0	1	0	1		P02538	1		O60500	1
1	P07437	TBB5_HUMAN	Tubulin beta chain OS=Homo sapiens GN=TUBB PE=1 SV=2	UFO_HUMAN	0	0	13	0	0	12	0	0	0	0	0	12	0	1	0	1		P07437	1		Q9NRY6	1
1	P31150	GDIA_HUMAN	Rab GDP dissociation inhibitor alpha OS=Homo sapiens GN=GDI1 PE=1 SV=2	NTF2_HUMAN	0	4	0	0	0	6	0	0	0	0	0	6	0	1	0	1		P31150	1		Q96HP8	1
1	P07384	CAN1_HUMAN	Calpain-1 catalytic subunit OS=Homo sapiens GN=CAPN1 PE=1 SV=1	SPR2D_HUMAN	0	8	0	0	0	5	0	0	0	0	0	5	0	1	0	1		P07384	1		Q96J84	1
1	P04080	CYTB_HUMAN	Cystatin-B OS=Homo sapiens GN=CSTB PE=1 SV=2	PSCA_HUMAN	1	2	0	0	0	3	0	0	0	0	0	3	0	1	0	1		P04080	1		P01623	1
1	P24855	DNAS1_HUMAN	Deoxyribonuclease-1 OS=Homo sapiens GN=DNASE1 PE=1 SV=1	CFAH_HUMAN	0	8	0	5	0	0	0	0	0	0	0	0	0	1	0	1		P24855	1		A0M8Q6	1
1	P15428	PGDH_HUMAN	15-hydroxyprostaglandin dehydrogenase [NAD(+)] OS=Homo sapiens GN=HPGD PE=1 SV=1	ELNE_HUMAN	1	0	2	0	0	2	0	0	0	0	0	2	0	1	0	1		P15428	1		Q3YBM2	1
1	P14543	NID1_HUMAN	Nidogen-1 OS=Homo sapiens GN=NID1 PE=1 SV=3	H2A1A_HUMAN	1	11	0	4	0	0	0	0	0	0	0	0	0	1	0	1		P14543	1		Q1MSJ5	1
1	P12273	PIP_HUMAN	Prolactin-inducible protein OS=Homo sapiens GN=PIP PE=1 SV=1	EPHB3_HUMAN	0	4	0	0	0	4	0	0	0	0	0	4	0	1	0	1		P12273	1		P01116	1
1	Q9NQ79	CRAC1_HUMAN	Cartilage acidic protein 1 OS=Homo sapiens GN=CRTAC1 PE=1 SV=2	PLSL_HUMAN	0	4	0	2	0	0	0	0	0	0	0	0	0	1	0	1		Q9NQ79	1		Q9NUQ9	1
1	P08697	A2AP_HUMAN	Alpha-2-antiplasmin OS=Homo sapiens GN=SERPINF2 PE=1 SV=3	ALS_HUMAN	1	6	0	3	0	0	0	0	0	0	0	0	0	1	0	1		P08697	1		P18462	1
1	Q5SZK8	FREM2_HUMAN	FRAS1-related extracellular matrix protein 2 OS=Homo sapiens GN=FREM2 PE=1 SV=2	ALAT1_HUMAN	0	22	0	6	0	0	0	0	0	0	0	0	0	1	0	1		Q5SZK8	1		Q6P5W5	1
1	P01614	KV201_HUMAN	Ig kappa chain V-II region Cum OS=Homo sapiens PE=1 SV=1	GSTA2_HUMAN	2	0	0	0	0	2	0	0	0	0	0	2	0	1	0	1		P01614	1		Q9Y6W5	1
1	P01596	KV104_HUMAN	Ig kappa chain V-I region CAR OS=Homo sapiens PE=1 SV=1	MXRA8_HUMAN	0	7	0	1	0	2	0	0	0	0	0	2	0	1	0	1		P01596	1		Q15758	1
1	P09417	DHPR_HUMAN	Dihydropteridine reductase OS=Homo sapiens GN=QDPR PE=1 SV=2	SPR1B_HUMAN	0	2	0	0	0	2	0	0	0	0	0	2	0	1	0	1		P09417	1		Q86T03	1
1	P34913	HYES_HUMAN	Bifunctional epoxide hydrolase 2 OS=Homo sapiens GN=EPHX2 PE=1 SV=2	S22A8_HUMAN	0	8	0	0	0	3	0	0	0	0	0	3	0	1	0	1		P34913	1		Q9BYE9	1
1	P35237	SPB6_HUMAN	Serpin B6 OS=Homo sapiens GN=SERPINB6 PE=1 SV=3	SIX5_HUMAN	0	4	0	0	0	2	0	0	0	0	0	2	0	1	0	1		P35237	1		Q9UHI7	1
1	P28161	GSTM2_HUMAN	Glutathione S-transferase Mu 2 OS=Homo sapiens GN=GSTM2 PE=1 SV=2	PCBP1_HUMAN	0	2	0	0	0	3	0	0	0	0	0	3	0	1	0	1		P28161	1		O95164	1
1	Q9H4A4	AMPB_HUMAN	Aminopeptidase B OS=Homo sapiens GN=RNPEP PE=1 SV=2	RTN4R_HUMAN	0	2	0	0	0	2	0	0	0	0	0	2	0	1	0	1		Q9H4A4	1		Q96LD4	1
1	P00390	GSHR_HUMAN	Glutathione reductase, mitochondrial OS=Homo sapiens GN=GSR PE=1 SV=2	ITB8_HUMAN	0	5	0	0	0	2	0	0	0	0	0	2	0	1	0	1		P00390	1		Q7L5L3	1
1	Q9UNN8	EPCR_HUMAN	Endothelial protein C receptor OS=Homo sapiens GN=PROCR PE=1 SV=1	FGL2_HUMAN	1	9	0	15	0	1	0	0	0	0	0	1	0	1	0	1		Q9UNN8	1		Q6ZWJ8	1
1	P52209	6PGD_HUMAN	6-phosphogluconate dehydrogenase, decarboxylating OS=Homo sapiens GN=PGD PE=1 SV=3	SIAT1_HUMAN	0	4	0	0	0	2	0	0	0	0	0	2	0	1	0	1		P52209	1		Q9Y6R1	1
1	P50990	TCPQ_HUMAN	T-complex protein 1 subunit theta OS=Homo sapiens GN=CCT8 PE=1 SV=4	PLEC_HUMAN	0	0	6	0	0	2	0	0	0	0	0	2	0	1	0	1		P50990	1		P27216	1
1	P0C0L5	CO4B_HUMAN	Complement C4-B OS=Homo sapiens GN=C4B PE=1 SV=2	KV310_HUMAN	0	47	0	14	0	0	0	0	0	0	0	0	0	1	0	1		P0C0L5	1		P24821	1
1	Q92673	SORL_HUMAN	Sortilin-related receptor OS=Homo sapiens GN=SORL1 PE=1 SV=2	PEPA3_HUMAN	0	9	1	4	0	0	0	0	0	0	0	0	0	1	0	1		Q92673	1		Q7Z2W4	1
1	Q6UX73	CP089_HUMAN	UPF0764 protein C16orf89 OS=Homo sapiens GN=C16orf89 PE=1 SV=2	ITIH2_HUMAN	0	3	0	5	0	0	0	0	0	0	0	0	0	1	0	1		Q6UX73	1		O15066	1
1	P58499	FAM3B_HUMAN	Protein FAM3B OS=Homo sapiens GN=FAM3B PE=1 SV=2	CRCT1_HUMAN	0	2	0	2	0	0	0	0	0	0	0	0	0	1	0	1		P58499	1		P08F94	1
1	P24592	IBP6_HUMAN	Insulin-like growth factor-binding protein 6 OS=Homo sapiens GN=IGFBP6 PE=1 SV=1	LPPR1_HUMAN	0	2	0	2	0	0	0	0	0	0	0	0	0	1	0	1		P24592	1		P01111	1
1	P09958	FURIN_HUMAN	Furin OS=Homo sapiens GN=FURIN PE=1 SV=2	PSB5_HUMAN	0	2	0	4	0	0	0	0	0	0	0	0	0	1	0	1		P09958	1		P48048	1
1	P54652	HSP72_HUMAN	Heat shock-related 70 kDa protein 2 OS=Homo sapiens GN=HSPA2 PE=1 SV=1	L1CAM_HUMAN	0	0	0	0	0	15	0	0	0	0	0	15	0	1	0	1		P54652	1		Q13286	1
1	P62745	RHOB_HUMAN	Rho-related GTP-binding protein RhoB OS=Homo sapiens GN=RHOB PE=1 SV=1	CAP1_HUMAN	0	0	0	0	0	3	0	0	0	0	0	3	0	1	0	1		P62745	1		Q6ZQN7	1
1	Q9HAC8	UBTD1_HUMAN	Ubiquitin domain-containing protein 1 OS=Homo sapiens GN=UBTD1 PE=1 SV=1	RAB1A_HUMAN	0	0	0	0	0	2	0	0	0	0	0	2	0	1	0	1		Q9HAC8	1		O60488	1
1	Q9H3Z4	DNJC5_HUMAN	DnaJ homolog subfamily C member 5 OS=Homo sapiens GN=DNAJC5 PE=1 SV=1	SHSA5_HUMAN	0	0	0	0	1	3	0	0	0	0	0	4	0	1	0	1		Q9H3Z4	1		O15374	1
1	P09758	TACD2_HUMAN	Tumor-associated calcium signal transducer 2 OS=Homo sapiens GN=TACSTD2 PE=1 SV=3	FBLN4_HUMAN	0	0	0	4	0	0	0	0	0	0	0	0	0	1	0	1		P09758	1		P61225	1
1	P05787	K2C8_HUMAN	Keratin, type II cytoskeletal 8 OS=Homo sapiens GN=KRT8 PE=1 SV=7	ENPP2_HUMAN	0	0	0	0	0	2	0	0	0	0	0	2	0	1	0	1		P05787	1		O00337	1
1	P61020	RAB5B_HUMAN	Ras-related protein Rab-5B OS=Homo sapiens GN=RAB5B PE=1 SV=1	FYN_HUMAN	0	0	0	0	0	2	0	0	0	0	0	2	0	1	0	1		P61020	1		Q99571	1
1	Q9BR76	COR1B_HUMAN	Coronin-1B OS=Homo sapiens GN=CORO1B PE=1 SV=1	CATG_HUMAN	0	0	0	0	0	5	0	0	0	0	0	5	0	1	0	1		Q9BR76	1		Q99102	1
1	Q9Y5Z4	HEBP2_HUMAN	Heme-binding protein 2 OS=Homo sapiens GN=HEBP2 PE=1 SV=1	CSF1_HUMAN	0	0	0	0	0	3	0	0	0	0	0	3	0	1	0	1		Q9Y5Z4	1		Q9HCH3	1
1	Q9UN36	NDRG2_HUMAN	Protein NDRG2 OS=Homo sapiens GN=NDRG2 PE=1 SV=2	CYTC_HUMAN	0	0	0	0	1	2	0	0	0	0	0	3	0	1	0	1		Q9UN36	1		Q8N357	1
1	Q8NEU8	DP13B_HUMAN	DCC-interacting protein 13-beta OS=Homo sapiens GN=APPL2 PE=1 SV=3	FIBA_HUMAN	0	0	1	0	0	4	0	0	0	0	0	4	0	1	0	1		Q8NEU8	1		P09327	1
1	P07741	APT_HUMAN	Adenine phosphoribosyltransferase OS=Homo sapiens GN=APRT PE=1 SV=2	PCKGC_HUMAN	0	0	0	0	0	2	0	0	0	0	0	2	0	1	0	1		P07741	1		Q9NRM0	1
1	Q6PHR2	ULK3_HUMAN	Serine/threonine-protein kinase ULK3 OS=Homo sapiens GN=ULK3 PE=1 SV=2	CO4A_HUMAN	0	0	0	1	0	3	0	0	0	0	0	3	0	1	0	1		Q6PHR2	1		Q9UHI5	1
1	P31947	1433S_HUMAN	14-3-3 protein sigma OS=Homo sapiens GN=SFN PE=1 SV=1	AL7A1_HUMAN	0	0	1	0	0	11	0	0	0	0	0	11	0	1	0	1		P31947	1		P21283	1
1	Q08188	TGM3_HUMAN	Protein-glutamine gamma-glutamyltransferase E OS=Homo sapiens GN=TGM3 PE=1 SV=4	FA11_HUMAN	0	9	0	1	0	0	0	0	0	0	0	0	0	1	0	1		Q08188	1		Q9UPI3	1
1	O95394	AGM1_HUMAN	Phosphoacetylglucosamine mutase OS=Homo sapiens GN=PGM3 PE=1 SV=1	FIBG_HUMAN	0	0	0	0	0	3	0	0	0	0	0	3	0	1	0	1		O95394	1		P21796	1
1	Q15904	VAS1_HUMAN	V-type proton ATPase subunit S1 OS=Homo sapiens GN=ATP6AP1 PE=1 SV=2	SEPP1_HUMAN	0	3	0	0	0	0	0	0	0	0	0	0	0	1	0	1		Q15904	1		Q96J02	1
1	P35858	ALS_HUMAN	Insulin-like growth factor-binding protein complex acid labile subunit OS=Homo sapiens GN=IGFALS PE=1 SV=1	TMM27_HUMAN	0	10	0	1	0	0	0	0	0	0	0	0	0	1	0	1		P35858	1		P34931	1
1	P24298	ALAT1_HUMAN	Alanine aminotransferase 1 OS=Homo sapiens GN=GPT PE=1 SV=3	CAD11_HUMAN	0	6	0	1	0	0	0	0	0	0	0	0	0	1	0	1		P24298	1		P08246	1
1	P49419	AL7A1_HUMAN	Alpha-aminoadipic semialdehyde dehydrogenase OS=Homo sapiens GN=ALDH7A1 PE=1 SV=5	SPR1A_HUMAN	0	0	0	0	0	3	0	0	0	0	0	3	0	1	0	1		P49419	1		Q8TCC7	1
1	P32929	CGL_HUMAN	Cystathionine gamma-lyase OS=Homo sapiens GN=CTH PE=1 SV=3	NCOR1_HUMAN	0	2	0	0	0	0	0	0	0	0	0	0	0	1	0	1		P32929	1		P15907	1
1	Q6UX72	B3GN9_HUMAN	UDP-GlcNAc:betaGal beta-1,3-N-acetylglucosaminyltransferase 9 OS=Homo sapiens GN=B3GNT9 PE=2 SV=1	NID1_HUMAN	0	1	0	2	0	0	0	0	0	0	0	0	0	1	0	1		Q6UX72	1		Q8N114	1
1	Q7KYR7	BT2A1_HUMAN	Butyrophilin subfamily 2 member A1 OS=Homo sapiens GN=BTN2A1 PE=1 SV=3	ARP2_HUMAN	1	0	0	2	0	0	0	0	0	0	0	0	0	1	0	1		Q7KYR7	1		P08311	1
1	Q9NZ08	ERAP1_HUMAN	Endoplasmic reticulum aminopeptidase 1 OS=Homo sapiens GN=ERAP1 PE=1 SV=3	QPCT_HUMAN	0	1	0	2	0	0	0	0	0	0	0	0	0	1	0	1		Q9NZ08	1		P09603	1
1	P17931	LEG3_HUMAN	Galectin-3 OS=Homo sapiens GN=LGALS3 PE=1 SV=5	ATL2_HUMAN	0	0	0	0	0	2	0	0	0	0	0	2	0	1	0	1		P17931	1		Q9HBJ8	1
1	Q11201	SIA4A_HUMAN	CMP-N-acetylneuraminate-beta-galactosamide-alpha-2,3-sialyltransferase 1 OS=Homo sapiens GN=ST3GAL1 PE=2 SV=1	B4GT1_HUMAN	0	0	0	2	0	0	0	0	0	0	0	0	0	1	0	1		Q11201	1		Q9BZG1	1
1	O75110	ATP9A_HUMAN	Probable phospholipid-transporting ATPase IIA OS=Homo sapiens GN=ATP9A PE=1 SV=3	RAB6A_HUMAN	0	0	0	0	0	4	0	0	0	0	0	4	0	1	0	1		O75110	1		P50440	1
1	P04180	LCAT_HUMAN	Phosphatidylcholine-sterol acyltransferase OS=Homo sapiens GN=LCAT PE=1 SV=1	TBB2A_HUMAN	0	4	0	0	0	0	0	0	0	0	0	0	0	1	0	1		P04180	1		Q8TDL5	1
1	P08637	FCG3A_HUMAN	Low affinity immunoglobulin gamma Fc region receptor III-A OS=Homo sapiens GN=FCGR3A PE=1 SV=2	HCK_HUMAN	0	1	0	2	0	0	0	0	0	0	0	0	0	1	0	1		P08637	1		P34741	1
1	P45877	PPIC_HUMAN	Peptidyl-prolyl cis-trans isomerase C OS=Homo sapiens GN=PPIC PE=1 SV=1	CGL_HUMAN	0	2	0	0	0	0	0	0	0	0	0	0	0	1	0	1		P45877	1		O95747	1
1	Q9NR34	MA1C1_HUMAN	Mannosyl-oligosaccharide 1,2-alpha-mannosidase IC OS=Homo sapiens GN=MAN1C1 PE=2 SV=1	TSN2_HUMAN	0	1	0	2	0	0	0	0	0	0	0	0	0	1	0	1		Q9NR34	1		P01613	1
1	P22392	NDKB_HUMAN	Nucleoside diphosphate kinase B OS=Homo sapiens GN=NME2 PE=1 SV=1	SAP_HUMAN	0	3	0	0	0	0	0	0	0	0	0	0	0	1	0	1		P22392	1		P68366	1
1	Q9Y3R5	DOP2_HUMAN	Protein dopey-2 OS=Homo sapiens GN=DOPEY2 PE=1 SV=5	RAB34_HUMAN	0	0	0	0	0	14	0	0	0	0	0	14	0	1	0	1		Q9Y3R5	1		P27169	1
1	P23284	PPIB_HUMAN	Peptidyl-prolyl cis-trans isomerase B OS=Homo sapiens GN=PPIB PE=1 SV=2	1B07_HUMAN	0	9	0	0	0	0	0	0	0	0	0	0	0	1	0	1		P23284	1		P62136	1
1	P21709	EPHA1_HUMAN	Ephrin type-A receptor 1 OS=Homo sapiens GN=EPHA1 PE=1 SV=4	BODG_HUMAN	0	0	0	5	0	0	0	0	0	0	0	0	0	1	0	1		P21709	1		P02792	1
1	Q562R1	ACTBL_HUMAN	Beta-actin-like protein 2 OS=Homo sapiens GN=ACTBL2 PE=1 SV=2	KIRR1_HUMAN	0	0	11	0	0	0	0	0	0	0	0	0	0	1	0	1		Q562R1	1		O43866	1
1	P17066	HSP76_HUMAN	Heat shock 70 kDa protein 6 OS=Homo sapiens GN=HSPA6 PE=1 SV=2	HBA_HUMAN	0	0	5	0	0	0	0	0	0	0	0	0	0	1	0	1		P17066	1		Q96S37	1
1	Q9BZQ8	NIBAN_HUMAN	Protein Niban OS=Homo sapiens GN=FAM129A PE=1 SV=1	CRYM_HUMAN	0	0	0	0	0	11	0	0	0	0	0	11	0	1	0	1		Q9BZQ8	1		Q15907	1
1	Q9BV36	MELPH_HUMAN	Melanophilin OS=Homo sapiens GN=MLPH PE=1 SV=1	MFSD4_HUMAN	0	0	0	0	0	6	0	0	0	0	0	6	0	1	0	1		Q9BV36	1		Q92930	1
1	Q9NR45	SIAS_HUMAN	Sialic acid synthase OS=Homo sapiens GN=NANS PE=1 SV=2	YIPF3_HUMAN	0	0	0	0	0	4	0	0	0	0	0	4	0	1	0	1		Q9NR45	1		P06681	1
1	Q9Y334	VWA7_HUMAN	von Willebrand factor A domain-containing protein 7 OS=Homo sapiens GN=VWA7 PE=2 SV=4	LEAP2_HUMAN	0	2	0	0	0	0	0	0	0	0	0	0	0	1	0	1		Q9Y334	1		Q9NSA0	1
1	P08185	CBG_HUMAN	Corticosteroid-binding globulin OS=Homo sapiens GN=SERPINA6 PE=1 SV=1	CB015_HUMAN	0	8	0	1	0	0	0	0	0	0	0	0	0	1	0	1		P08185	1		P13688	1
1	O43396	TXNL1_HUMAN	Thioredoxin-like protein 1 OS=Homo sapiens GN=TXNL1 PE=1 SV=3	CLD19_HUMAN	0	0	0	0	0	2	0	0	0	0	0	2	0	1	0	1		O43396	1		P37235	1
1	P13646	K1C13_HUMAN	Keratin, type I cytoskeletal 13 OS=Homo sapiens GN=KRT13 PE=1 SV=4	SLX4_HUMAN	3	0	0	1	0	0	0	0	0	0	0	0	0	1	0	1		P13646	1		P18085	1
1	Q99574	NEUS_HUMAN	Neuroserpin OS=Homo sapiens GN=SERPINI1 PE=1 SV=1	DYH17_HUMAN	0	8	0	0	0	0	0	0	0	0	0	0	0	1	0	1		Q99574	1		Q16695	1
1	Q01469	FABP5_HUMAN	Fatty acid-binding protein, epidermal OS=Homo sapiens GN=FABP5 PE=1 SV=3	STXB2_HUMAN	0	5	0	0	0	0	0	0	0	0	0	0	0	1	0	1		Q01469	1		P28067	1
1	P32926	DSG3_HUMAN	Desmoglein-3 OS=Homo sapiens GN=DSG3 PE=1 SV=2	1A02_HUMAN	0	6	0	0	0	0	0	0	0	0	0	0	0	1	0	1		P32926	1		O00401	1
1	Q92520	FAM3C_HUMAN	Protein FAM3C OS=Homo sapiens GN=FAM3C PE=1 SV=1	H90B2_HUMAN	0	6	0	1	0	0	0	0	0	0	0	0	0	1	0	1		Q92520	1		O14672	1
1	P04424	ARLY_HUMAN	Argininosuccinate lyase OS=Homo sapiens GN=ASL PE=1 SV=4	RAB13_HUMAN	0	5	0	0	0	0	0	0	0	0	0	0	0	1	0	1		P04424	1		P07148	1
1	P05089	ARGI1_HUMAN	Arginase-1 OS=Homo sapiens GN=ARG1 PE=1 SV=2	GG6L2_HUMAN	0	3	0	0	0	0	0	0	0	0	0	0	0	1	0	1		P05089	1		P30046	1
1	O75841	UPK1B_HUMAN	Uroplakin-1b OS=Homo sapiens GN=UPK1B PE=2 SV=5	CY561_HUMAN	0	0	0	0	0	5	0	0	0	0	0	5	0	1	0	1		O75841	1		P07686	1
1	Q687X5	STEA4_HUMAN	Metalloreductase STEAP4 OS=Homo sapiens GN=STEAP4 PE=1 SV=1	SPAT7_HUMAN	0	0	0	0	0	9	0	0	0	0	0	9	0	1	0	1		Q687X5	1		Q9UJ72	1
1	Q9NQX4	MYO5C_HUMAN	Unconventional myosin-Vc OS=Homo sapiens GN=MYO5C PE=1 SV=2	MUC19_HUMAN	0	0	0	0	0	4	0	0	0	0	0	4	0	1	0	1		Q9NQX4	1		Q99798	1
1	O15296	LX15B_HUMAN	Arachidonate 15-lipoxygenase B OS=Homo sapiens GN=ALOX15B PE=1 SV=3	FBLN1_HUMAN	0	0	0	0	1	4	0	0	0	0	0	5	0	1	0	1		O15296	1		P36405	1
1	Q9NP72	RAB18_HUMAN	Ras-related protein Rab-18 OS=Homo sapiens GN=RAB18 PE=1 SV=1	SEMG2_HUMAN	0	0	0	0	0	3	0	0	0	0	0	3	0	1	0	1		Q9NP72	1		P49788	1
1	P26842	CD27_HUMAN	CD27 antigen OS=Homo sapiens GN=CD27 PE=1 SV=2	SEMG1_HUMAN	1	0	0	0	0	2	0	0	0	0	0	2	0	1	0	1		P26842	1		P02746	1
1	Q8N128	F177A_HUMAN	Protein FAM177A1 OS=Homo sapiens GN=FAM177A1 PE=1 SV=1	TGM4_HUMAN	0	0	0	0	0	2	0	0	0	0	0	2	0	1	0	1		Q8N128	1		P16930	1
1	P51159	RB27A_HUMAN	Ras-related protein Rab-27A OS=Homo sapiens GN=RAB27A PE=1 SV=3	MUC5B_HUMAN	0	0	0	0	0	7	0	0	0	0	0	7	0	1	0	1		P51159	1		P47755	1
1	P0CG04	LAC1_HUMAN	Ig lambda-1 chain C regions OS=Homo sapiens GN=IGLC1 PE=1 SV=1	DDR1_HUMAN	0	0	0	0	0	7	0	0	0	0	0	7	0	1	0	1		P0CG04	1		P43686	1
1	Q06210	GFPT1_HUMAN	Glutamine--fructose-6-phosphate aminotransferase [isomerizing] 1 OS=Homo sapiens GN=GFPT1 PE=1 SV=3	PAPP2_HUMAN	0	0	0	0	0	4	0	0	0	0	0	4	0	1	0	1		Q06210	1		P07358	1
1	P54578	UBP14_HUMAN	Ubiquitin carboxyl-terminal hydrolase 14 OS=Homo sapiens GN=USP14 PE=1 SV=3	IGLL5_HUMAN	0	0	0	0	0	2	0	0	0	0	0	2	0	1	0	1		P54578	1		Q9H8S9	1
1	P28907	CD38_HUMAN	ADP-ribosyl cyclase/cyclic ADP-ribose hydrolase 1 OS=Homo sapiens GN=CD38 PE=1 SV=2	PIP_HUMAN	0	0	0	0	0	4	0	0	0	0	0	4	0	1	0	1		P28907	1		Q08554	1
1	P60842	IF4A1_HUMAN	Eukaryotic initiation factor 4A-I OS=Homo sapiens GN=EIF4A1 PE=1 SV=1	PAEP_HUMAN	0	1	0	0	0	3	0	0	0	0	0	3	0	1	0	1		P60842	1		P02794	1
1	P55327	TPD52_HUMAN	Tumor protein D52 OS=Homo sapiens GN=TPD52 PE=1 SV=2	IGHG4_HUMAN	0	0	0	0	4	2	0	0	0	0	0	6	0	1	0	1		P55327	1		O76082	1
1	Q969L2	MAL2_HUMAN	Protein MAL2 OS=Homo sapiens GN=MAL2 PE=1 SV=1	KV105_HUMAN	0	1	0	0	1	2	0	0	0	0	0	3	0	1	0	1		Q969L2	1		P11168	1
1	P12814	ACTN1_HUMAN	Alpha-actinin-1 OS=Homo sapiens GN=ACTN1 PE=1 SV=2	A1BG_HUMAN	0	0	0	0	0	3	0	0	0	0	0	3	0	1	0	1		P12814	1		Q9UHG3	1
1	Q9NV96	CC50A_HUMAN	Cell cycle control protein 50A OS=Homo sapiens GN=TMEM30A PE=1 SV=1	CAMP_HUMAN	0	0	0	0	0	2	0	0	0	0	0	2	0	1	0	1		Q9NV96	1		P54803	1
1	Q6IWH7	ANO7_HUMAN	Anoctamin-7 OS=Homo sapiens GN=ANO7 PE=1 SV=2	HYAL1_HUMAN	0	0	0	0	0	4	0	0	0	0	0	4	0	1	0	1		Q6IWH7	1		Q9NP91	1
1	Q8IV36	HID1_HUMAN	Protein HID1 OS=Homo sapiens GN=HID1 PE=1 SV=1	GRP78_HUMAN	0	0	0	0	0	3	0	0	0	0	0	3	0	1	0	1		Q8IV36	1		Q96BM9	1
1	P47895	AL1A3_HUMAN	Aldehyde dehydrogenase family 1 member A3 OS=Homo sapiens GN=ALDH1A3 PE=1 SV=2	TRFL_HUMAN	0	0	0	0	0	3	0	0	0	0	0	3	0	1	0	1		P47895	1		P09914	1
1	O43581	SYT7_HUMAN	Synaptotagmin-7 OS=Homo sapiens GN=SYT7 PE=1 SV=3	KV305_HUMAN	0	0	0	0	0	3	0	0	0	0	0	3	0	1	0	1		O43581	1		P01608	1
1	Q99832	TCPH_HUMAN	T-complex protein 1 subunit eta OS=Homo sapiens GN=CCT7 PE=1 SV=2	LIRA5_HUMAN	0	0	0	0	0	2	0	0	0	0	0	2	0	1	0	1		Q99832	1		P98172	1
1	O75369	FLNB_HUMAN	Filamin-B OS=Homo sapiens GN=FLNB PE=1 SV=2	KLK3_HUMAN	0	0	0	0	0	3	0	0	0	0	0	3	0	1	0	1		O75369	1		P01621	1
1	P50443	S26A2_HUMAN	Sulfate transporter OS=Homo sapiens GN=SLC26A2 PE=1 SV=2	OLR1_HUMAN	0	0	0	0	0	2	0	0	0	0	0	2	0	1	0	1		P50443	1		P01604	1
1	Q9Y2Q0	AT8A1_HUMAN	Phospholipid-transporting ATPase IA OS=Homo sapiens GN=ATP8A1 PE=1 SV=1	MASP2_HUMAN	0	0	0	0	4	2	0	0	0	0	0	6	0	1	0	1		Q9Y2Q0	1		P55291	1
1	O43813	LANC1_HUMAN	LanC-like protein 1 OS=Homo sapiens GN=LANCL1 PE=1 SV=1	TINAL_HUMAN	0	0	0	0	0	2	0	0	0	0	0	2	0	1	0	1		O43813	1		Q9H3K2	1
1	P43490	NAMPT_HUMAN	Nicotinamide phosphoribosyltransferase OS=Homo sapiens GN=NAMPT PE=1 SV=1	COIA1_HUMAN	0	0	0	0	0	3	0	0	0	0	0	3	0	1	0	1		P43490	1		P54793	1
1	Q13938	CAYP1_HUMAN	Calcyphosin OS=Homo sapiens GN=CAPS PE=1 SV=1	NOV_HUMAN	1	0	0	0	0	3	0	0	0	0	0	3	0	1	0	1		Q13938	1		P0CG06	1
1	P02749	APOH_HUMAN	Beta-2-glycoprotein 1 OS=Homo sapiens GN=APOH PE=1 SV=3	CRAC1_HUMAN	0	0	0	1	0	2	0	0	0	0	0	2	0	1	0	1		P02749	1		Q01459	1
1	P50991	TCPD_HUMAN	T-complex protein 1 subunit delta OS=Homo sapiens GN=CCT4 PE=1 SV=4	PATE1_HUMAN	0	3	0	0	0	1	0	0	0	0	0	1	0	1	0	1		P50991	1		Q16827	1
1	P09488	GSTM1_HUMAN	Glutathione S-transferase Mu 1 OS=Homo sapiens GN=GSTM1 PE=1 SV=3	DEFB1_HUMAN	0	0	0	1	1	4	0	0	0	0	0	5	0	1	0	1		P09488	1		P18135	1
1	Q86VP6	CAND1_HUMAN	Cullin-associated NEDD8-dissociated protein 1 OS=Homo sapiens GN=CAND1 PE=1 SV=2	HV102_HUMAN	0	0	0	0	1	2	0	0	0	0	0	3	0	1	0	1		Q86VP6	1		P30464	1
1	Q969T9	WBP2_HUMAN	WW domain-binding protein 2 OS=Homo sapiens GN=WBP2 PE=1 SV=1	BHMT2_HUMAN	0	0	0	0	0	2	0	0	0	0	0	2	0	1	0	1		Q969T9	1		P30047	1
1	Q9Y5Z0	BACE2_HUMAN	Beta-secretase 2 OS=Homo sapiens GN=BACE2 PE=1 SV=1	HEPC_HUMAN	0	0	0	0	0	2	0	0	0	0	0	2	0	1	0	1		Q9Y5Z0	1		Q9Y5Y7	1
1	P49368	TCPG_HUMAN	T-complex protein 1 subunit gamma OS=Homo sapiens GN=CCT3 PE=1 SV=4	TERA_HUMAN	0	0	2	0	0	1	0	0	0	0	0	1	0	1	0	1		P49368	1		Q13630	1
1	O60262	GBG7_HUMAN	Guanine nucleotide-binding protein G(I)/G(S)/G(O) subunit gamma-7 OS=Homo sapiens GN=GNG7 PE=1 SV=1	ISLR_HUMAN	0	0	0	0	0	3	0	0	0	0	0	3	0	1	0	1		O60262	1		Q8WZ42	1
1	Q8N335	GPD1L_HUMAN	Glycerol-3-phosphate dehydrogenase 1-like protein OS=Homo sapiens GN=GPD1L PE=1 SV=1	NUCB2_HUMAN	0	0	0	0	0	4	0	0	0	0	0	4	0	1	0	1		Q8N335	1		Q92954	1
1	Q9NUP9	LIN7C_HUMAN	Protein lin-7 homolog C OS=Homo sapiens GN=LIN7C PE=1 SV=1	CRIS1_HUMAN	0	0	0	0	0	2	0	0	0	0	0	2	0	1	0	1		Q9NUP9	1		P08138	1
1	P04066	FUCO_HUMAN	Tissue alpha-L-fucosidase OS=Homo sapiens GN=FUCA1 PE=1 SV=4	HV319_HUMAN	0	4	0	0	0	1	0	0	0	0	0	1	0	1	0	1		P04066	1		P26992	1
1	O95433	AHSA1_HUMAN	Activator of 90 kDa heat shock protein ATPase homolog 1 OS=Homo sapiens GN=AHSA1 PE=1 SV=1	K1C16_HUMAN	0	0	0	0	0	2	0	0	0	0	0	2	0	1	0	1		O95433	1		Q9UBR2	1
1	Q9NZD2	GLTP_HUMAN	Glycolipid transfer protein OS=Homo sapiens GN=GLTP PE=1 SV=3	B3GN9_HUMAN	0	1	0	0	0	2	0	0	0	0	0	2	0	1	0	1		Q9NZD2	1		Q12983	1
1	Q14240	IF4A2_HUMAN	Eukaryotic initiation factor 4A-II OS=Homo sapiens GN=EIF4A2 PE=1 SV=2	LAMA5_HUMAN	0	0	0	0	0	2	0	0	0	0	0	2	0	1	0	1		Q14240	1		P08238	0
1	Q5VWZ2	LYPL1_HUMAN	Lysophospholipase-like protein 1 OS=Homo sapiens GN=LYPLAL1 PE=1 SV=3	MBTP1_HUMAN	0	0	0	0	0	2	0	0	0	0	0	2	0	1	0	1		Q5VWZ2	1		P02538	0
1	P17655	CAN2_HUMAN	Calpain-2 catalytic subunit OS=Homo sapiens GN=CAPN2 PE=1 SV=6	GPR56_HUMAN	0	3	0	0	0	1	0	0	0	0	0	1	0	1	0	1		P17655	1		P07437	0
1	P40227	TCPZ_HUMAN	T-complex protein 1 subunit zeta OS=Homo sapiens GN=CCT6A PE=1 SV=3	HEMO_HUMAN	0	2	0	0	0	1	0	0	0	0	0	1	0	1	0	1		P40227	1		P31150	0
1	Q15435	PP1R7_HUMAN	Protein phosphatase 1 regulatory subunit 7 OS=Homo sapiens GN=PPP1R7 PE=1 SV=1	HS90B_HUMAN	0	0	0	0	0	2	0	0	0	0	0	2	0	1	0	1		Q15435	1		P07384	0
1	P19961	AMY2B_HUMAN	Alpha-amylase 2B OS=Homo sapiens GN=AMY2B PE=1 SV=1	BT2A1_HUMAN	0	21	0	0	0	0	0	0	0	0	0	0	0	1	0	1		P19961	1		P04080	0
1	Q9UIV8	SPB13_HUMAN	Serpin B13 OS=Homo sapiens GN=SERPINB13 PE=1 SV=2	AL1L1_HUMAN	0	21	0	0	0	0	0	0	0	0	0	0	0	1	0	1		Q9UIV8	1		P24855	0
1	P01610	KV118_HUMAN	Ig kappa chain V-I region WEA OS=Homo sapiens PE=1 SV=1	OLFM4_HUMAN	0	7	0	0	0	0	0	0	0	0	0	0	0	1	0	1		P01610	1		P15428	0
1	P43251	BTD_HUMAN	Biotinidase OS=Homo sapiens GN=BTD PE=1 SV=2	ECM1_HUMAN	0	10	0	0	0	0	0	0	0	0	0	0	0	1	0	1		P43251	1		P14543	0
1	P62736	ACTA_HUMAN	Actin, aortic smooth muscle OS=Homo sapiens GN=ACTA2 PE=1 SV=1	PLPP_HUMAN	0	9	0	0	0	0	0	0	0	0	0	0	0	1	0	1		P62736	1		P12273	0
1	P30740	ILEU_HUMAN	Leukocyte elastase inhibitor OS=Homo sapiens GN=SERPINB1 PE=1 SV=1	CLN5_HUMAN	0	12	0	0	0	0	0	0	0	0	0	0	0	1	0	1		P30740	1		Q9NQ79	0
1	Q8TCD5	NT5C_HUMAN	5~(3~)-deoxyribonucleotidase, cytosolic type OS=Homo sapiens GN=NT5C PE=1 SV=2	ERAP1_HUMAN	0	6	0	0	0	0	0	0	0	0	0	0	0	1	0	1		Q8TCD5	1		P08697	0
1	Q96P63	SPB12_HUMAN	Serpin B12 OS=Homo sapiens GN=SERPINB12 PE=1 SV=1	FUCO2_HUMAN	0	9	0	0	0	0	0	0	0	0	0	0	0	1	0	1		Q96P63	1		Q5SZK8	0
1	P02652	APOA2_HUMAN	Apolipoprotein A-II OS=Homo sapiens GN=APOA2 PE=1 SV=1	GLT18_HUMAN	0	4	0	0	0	0	0	0	0	0	0	0	0	1	0	1		P02652	1		P01614	0
1	Q96HE7	ERO1A_HUMAN	ERO1-like protein alpha OS=Homo sapiens GN=ERO1L PE=1 SV=2	PRIO_HUMAN	0	5	0	0	0	0	0	0	0	0	0	0	0	1	0	1		Q96HE7	1		P01596	0
1	P06280	AGAL_HUMAN	Alpha-galactosidase A OS=Homo sapiens GN=GLA PE=1 SV=1	ARSA_HUMAN	0	4	0	0	0	0	0	0	0	0	0	0	0	1	0	1		P06280	1		P09417	0
1	P14625	ENPL_HUMAN	Endoplasmin OS=Homo sapiens GN=HSP90B1 PE=1 SV=1	A2AP_HUMAN	0	5	0	0	0	0	0	0	0	0	0	0	0	1	0	1		P14625	1		P34913	0
1	P00736	C1R_HUMAN	Complement C1r subcomponent OS=Homo sapiens GN=C1R PE=1 SV=2	MPRI_HUMAN	0	5	0	0	0	0	0	0	0	0	0	0	0	1	0	1		P00736	1		P35237	0
1	Q96MM7	H6ST2_HUMAN	Heparan-sulfate 6-O-sulfotransferase 2 OS=Homo sapiens GN=HS6ST2 PE=2 SV=2	ANGL2_HUMAN	0	5	0	1	0	0	0	0	0	0	0	0	0	1	0	1		Q96MM7	1		P28161	0
1	P17050	NAGAB_HUMAN	Alpha-N-acetylgalactosaminidase OS=Homo sapiens GN=NAGA PE=1 SV=2	CBPE_HUMAN	0	5	0	0	0	0	0	0	0	0	0	0	0	1	0	1		P17050	1		Q9H4A4	0
1	O00757	F16P2_HUMAN	Fructose-1,6-bisphosphatase isozyme 2 OS=Homo sapiens GN=FBP2 PE=1 SV=2	LEG3_HUMAN	0	6	0	0	0	0	0	0	0	0	0	0	0	1	0	1		O00757	1		P00390	0
1	O75144	ICOSL_HUMAN	ICOS ligand OS=Homo sapiens GN=ICOSLG PE=1 SV=2	SEM6D_HUMAN	0	3	0	0	0	0	0	0	0	0	0	0	0	1	0	1		O75144	1		Q9UNN8	0
1	Q6PCB0	VWA1_HUMAN	von Willebrand factor A domain-containing protein 1 OS=Homo sapiens GN=VWA1 PE=2 SV=1	CD177_HUMAN	0	5	0	0	0	0	0	0	0	0	0	0	0	1	0	1		Q6PCB0	1		P52209	0
1	Q15274	NADC_HUMAN	Nicotinate-nucleotide pyrophosphorylase [carboxylating] OS=Homo sapiens GN=QPRT PE=1 SV=3	CD44_HUMAN	0	7	0	0	0	0	0	0	0	0	0	0	0	1	0	1		Q15274	1		P50990	0
1	Q8N307	MUC20_HUMAN	Mucin-20 OS=Homo sapiens GN=MUC20 PE=1 SV=3	CR1L_HUMAN	0	3	0	0	0	0	0	0	0	0	0	0	0	1	0	1		Q8N307	1		P0C0L5	0
1	O75326	SEM7A_HUMAN	Semaphorin-7A OS=Homo sapiens GN=SEMA7A PE=1 SV=1	KV106_HUMAN	0	6	0	0	0	0	0	0	0	0	0	0	0	1	0	1		O75326	1		Q92673	0
1	Q8TB96	TIP_HUMAN	T-cell immunomodulatory protein OS=Homo sapiens GN=ITFG1 PE=1 SV=1	SIA4A_HUMAN	0	4	0	0	0	0	0	0	0	0	0	0	0	1	0	1		Q8TB96	1		Q6UX73	0
1	P07360	CO8G_HUMAN	Complement component C8 gamma chain OS=Homo sapiens GN=C8G PE=1 SV=3	GATM_HUMAN	0	5	0	0	0	0	0	0	0	0	0	0	0	1	0	1		P07360	1		P58499	0
1	P04062	GLCM_HUMAN	Glucosylceramidase OS=Homo sapiens GN=GBA PE=1 SV=3	ATP9A_HUMAN	0	4	0	0	0	0	0	0	0	0	0	0	0	1	0	1		P04062	1		P24592	0
1	O60613	SEP15_HUMAN	15 kDa selenoprotein OS=Homo sapiens GN=SEP15 PE=1 SV=3	BGAT_HUMAN	0	1	0	3	0	0	0	0	0	0	0	0	0	1	0	1		O60613	1		P09958	0
1	P00439	PH4H_HUMAN	Phenylalanine-4-hydroxylase OS=Homo sapiens GN=PAH PE=1 SV=1	MUC13_HUMAN	0	2	0	0	0	0	0	0	0	0	0	0	0	1	0	1		P00439	1		P54652	0
1	O95084	PRS23_HUMAN	Serine protease 23 OS=Homo sapiens GN=PRSS23 PE=1 SV=1	THBG_HUMAN	0	3	0	0	0	0	0	0	0	0	0	0	0	1	0	1		O95084	1		P62745	0
1	Q6UWV6	ENPP7_HUMAN	Ectonucleotide pyrophosphatase/phosphodiesterase family member 7 OS=Homo sapiens GN=ENPP7 PE=1 SV=3	LCAT_HUMAN	0	3	0	0	0	0	0	0	0	0	0	0	0	1	0	1		Q6UWV6	1		Q9HAC8	0
1	P52907	CAZA1_HUMAN	F-actin-capping protein subunit alpha-1 OS=Homo sapiens GN=CAPZA1 PE=1 SV=3	CFAD_HUMAN	0	4	0	0	0	0	0	0	0	0	0	0	0	1	0	1		P52907	1		Q9H3Z4	0
1	P35606	COPB2_HUMAN	Coatomer subunit beta~ OS=Homo sapiens GN=COPB2 PE=1 SV=2	HDHD3_HUMAN	0	3	0	0	0	0	0	0	0	0	0	0	0	1	0	1		P35606	1		P09758	0
1	Q99538	LGMN_HUMAN	Legumain OS=Homo sapiens GN=LGMN PE=1 SV=1	GPV_HUMAN	0	2	0	0	0	0	0	0	0	0	0	0	0	1	0	1		Q99538	1		P05787	0
1	Q71UI9	H2AV_HUMAN	Histone H2A.V OS=Homo sapiens GN=H2AFV PE=1 SV=3	FCG3A_HUMAN	0	4	0	0	0	0	0	0	0	0	0	0	0	1	0	1		Q71UI9	1		P61020	0
1	Q9NY97	B3GN2_HUMAN	UDP-GlcNAc:betaGal beta-1,3-N-acetylglucosaminyltransferase 2 OS=Homo sapiens GN=B3GNT2 PE=1 SV=2	LDHC_HUMAN	0	2	0	0	0	0	0	0	0	0	0	0	0	1	0	1		Q9NY97	1		Q9BR76	0
1	P13716	HEM2_HUMAN	Delta-aminolevulinic acid dehydratase OS=Homo sapiens GN=ALAD PE=1 SV=1	GNPTG_HUMAN	0	5	0	0	0	0	0	0	0	0	0	0	0	1	0	1		P13716	1		Q9Y5Z4	0
1	P07237	PDIA1_HUMAN	Protein disulfide-isomerase OS=Homo sapiens GN=P4HB PE=1 SV=3	AMD_HUMAN	0	3	0	0	0	0	0	0	0	0	0	0	0	1	0	1		P07237	1		Q9UN36	0
1	O43155	FLRT2_HUMAN	Leucine-rich repeat transmembrane protein FLRT2 OS=Homo sapiens GN=FLRT2 PE=1 SV=1	EPHAA_HUMAN	0	5	0	0	0	0	0	0	0	0	0	0	0	1	0	1		O43155	1		Q8NEU8	0
1	P36952	SPB5_HUMAN	Serpin B5 OS=Homo sapiens GN=SERPINB5 PE=1 SV=2	ADHX_HUMAN	0	5	0	0	0	0	0	0	0	0	0	0	0	1	0	1		P36952	1		P07741	0
1	P04439	1A03_HUMAN	HLA class I histocompatibility antigen, A-3 alpha chain OS=Homo sapiens GN=HLA-A PE=1 SV=2	LY75_HUMAN	0	4	0	0	0	0	0	0	0	0	0	0	0	1	0	1		P04439	1		Q6PHR2	0
1	O00754	MA2B1_HUMAN	Lysosomal alpha-mannosidase OS=Homo sapiens GN=MAN2B1 PE=1 SV=3	THTM_HUMAN	0	2	0	0	0	0	0	0	0	0	0	0	0	1	0	1		O00754	1		P31947	0
1	P30101	PDIA3_HUMAN	Protein disulfide-isomerase A3 OS=Homo sapiens GN=PDIA3 PE=1 SV=4	LSAMP_HUMAN	0	2	0	0	0	0	0	0	0	0	0	0	0	1	0	1		P30101	1		Q08188	0
1	Q8NI99	ANGL6_HUMAN	Angiopoietin-related protein 6 OS=Homo sapiens GN=ANGPTL6 PE=1 SV=1	CYTM_HUMAN	0	2	0	0	0	0	0	0	0	0	0	0	0	1	0	1		Q8NI99	1		O95394	0
1	P05120	PAI2_HUMAN	Plasminogen activator inhibitor 2 OS=Homo sapiens GN=SERPINB2 PE=1 SV=2	MGT5A_HUMAN	0	2	0	0	0	0	0	0	0	0	0	0	0	1	0	1		P05120	1		Q15904	0
1	P18428	LBP_HUMAN	Lipopolysaccharide-binding protein OS=Homo sapiens GN=LBP PE=1 SV=3	PTPRG_HUMAN	0	2	0	0	0	0	0	0	0	0	0	0	0	1	0	1		P18428	1		P35858	0
1	Q6MZW2	FSTL4_HUMAN	Follistatin-related protein 4 OS=Homo sapiens GN=FSTL4 PE=2 SV=3	PLOD3_HUMAN	0	2	0	0	0	0	0	0	0	0	0	0	0	1	0	1		Q6MZW2	1		P24298	0
1	O95841	ANGL1_HUMAN	Angiopoietin-related protein 1 OS=Homo sapiens GN=ANGPTL1 PE=2 SV=1	LV102_HUMAN	0	3	0	0	0	0	0	0	0	0	0	0	0	1	0	1		O95841	1		P49419	0
1	P52823	STC1_HUMAN	Stanniocalcin-1 OS=Homo sapiens GN=STC1 PE=1 SV=1	PPIC_HUMAN	0	2	0	1	0	0	0	0	0	0	0	0	0	1	0	1		P52823	1		P32929	0
1	Q8TF66	LRC15_HUMAN	Leucine-rich repeat-containing protein 15 OS=Homo sapiens GN=LRRC15 PE=1 SV=2	TWSG1_HUMAN	0	3	0	0	0	0	0	0	0	0	0	0	0	1	0	1		Q8TF66	1		Q6UX72	0
1	Q6ZVX7	FBX50_HUMAN	F-box only protein 50 OS=Homo sapiens GN=NCCRP1 PE=1 SV=1	MA1C1_HUMAN	0	2	0	0	0	0	0	0	0	0	0	0	0	1	0	1		Q6ZVX7	1		Q7KYR7	0
1	Q86TX2	ACOT1_HUMAN	Acyl-coenzyme A thioesterase 1 OS=Homo sapiens GN=ACOT1 PE=1 SV=1	FCN2_HUMAN	0	3	0	0	0	0	0	0	0	0	0	0	0	1	0	1		Q86TX2	1		Q9NZ08	0
1	Q9BRT3	MIEN1_HUMAN	Migration and invasion enhancer 1 OS=Homo sapiens GN=MIEN1 PE=1 SV=1	GPR64_HUMAN	0	3	0	0	0	0	0	0	0	0	0	0	0	1	0	1		Q9BRT3	1		P17931	0
1	P00505	AATM_HUMAN	Aspartate aminotransferase, mitochondrial OS=Homo sapiens GN=GOT2 PE=1 SV=3	A4_HUMAN	0	3	0	0	0	0	0	0	0	0	0	0	0	1	0	1		P00505	1		Q11201	0
1	P06311	KV311_HUMAN	Ig kappa chain V-III region IARC/BL41 OS=Homo sapiens PE=1 SV=1	IF6_HUMAN	0	2	0	0	0	0	0	0	0	0	0	0	0	1	0	1		P06311	1		O75110	0
1	Q15631	TSN_HUMAN	Translin OS=Homo sapiens GN=TSN PE=1 SV=1	LV302_HUMAN	0	2	0	0	0	0	0	0	0	0	0	0	0	1	0	1		Q15631	1		P04180	0
1	Q9H254	SPTN4_HUMAN	Spectrin beta chain, non-erythrocytic 4 OS=Homo sapiens GN=SPTBN4 PE=1 SV=2	OGFD3_HUMAN	0	2	0	0	0	0	0	0	0	0	0	0	0	1	0	1		Q9H254	1		P08637	0
1	P20062	TCO2_HUMAN	Transcobalamin-2 OS=Homo sapiens GN=TCN2 PE=1 SV=3	A2GL_HUMAN	0	2	0	0	0	0	0	0	0	0	0	0	0	1	0	1		P20062	1		P45877	0
1	P17342	ANPRC_HUMAN	Atrial natriuretic peptide receptor 3 OS=Homo sapiens GN=NPR3 PE=1 SV=2	HEBP1_HUMAN	0	2	0	0	0	0	0	0	0	0	0	0	0	1	0	1		P17342	1		Q9NR34	0
1	P62826	RAN_HUMAN	GTP-binding nuclear protein Ran OS=Homo sapiens GN=RAN PE=1 SV=3	SCTM1_HUMAN	0	1	3	0	1	0	0	0	0	0	0	1	0	1	0	1		P62826	1		P22392	0
1	O60462	NRP2_HUMAN	Neuropilin-2 OS=Homo sapiens GN=NRP2 PE=1 SV=2	CLC14_HUMAN	0	1	0	2	0	0	0	0	0	0	0	0	0	1	0	1		O60462	1		Q9Y3R5	0
1	P07305	H10_HUMAN	Histone H1.0 OS=Homo sapiens GN=H1F0 PE=1 SV=3	BPIB2_HUMAN	0	2	0	0	0	0	0	0	0	0	0	0	0	1	0	1		P07305	1		P23284	0
1	P46926	GNPI1_HUMAN	Glucosamine-6-phosphate isomerase 1 OS=Homo sapiens GN=GNPDA1 PE=1 SV=1	TFF3_HUMAN	0	3	0	0	0	0	0	0	0	0	0	0	0	1	0	1		P46926	1		P21709	0
1	O95450	ATS2_HUMAN	A disintegrin and metalloproteinase with thrombospondin motifs 2 OS=Homo sapiens GN=ADAMTS2 PE=2 SV=2	TAC2N_HUMAN	0	2	0	0	0	0	0	0	0	0	0	0	0	1	0	1		O95450	1		Q562R1	0
1	O60603	TLR2_HUMAN	Toll-like receptor 2 OS=Homo sapiens GN=TLR2 PE=1 SV=1	PLOD1_HUMAN	0	2	0	0	0	0	0	0	0	0	0	0	0	1	0	1		O60603	1		P17066	0
1	Q11206	SIA4C_HUMAN	CMP-N-acetylneuraminate-beta-galactosamide-alpha-2,3-sialyltransferase 4 OS=Homo sapiens GN=ST3GAL4 PE=2 SV=1	DNS2A_HUMAN	0	2	0	0	0	0	0	0	0	0	0	0	0	1	0	1		Q11206	1		Q9BZQ8	0
1	Q86SF2	GALT7_HUMAN	N-acetylgalactosaminyltransferase 7 OS=Homo sapiens GN=GALNT7 PE=1 SV=1	FRPD1_HUMAN	0	0	0	2	0	0	0	0	0	0	0	0	0	1	0	1		Q86SF2	1		Q9BV36	0
1	Q08211	DHX9_HUMAN	ATP-dependent RNA helicase A OS=Homo sapiens GN=DHX9 PE=1 SV=4	NDKB_HUMAN	0	0	4	0	0	0	0	0	0	0	0	0	0	1	0	1		Q08211	1		Q9NR45	0
1	P30508	1C12_HUMAN	HLA class I histocompatibility antigen, Cw-12 alpha chain OS=Homo sapiens GN=HLA-C PE=2 SV=2	ZNF99_HUMAN	0	0	0	4	0	0	0	0	0	0	0	0	0	1	0	1		P30508	1		Q9Y334	0
1	P23396	RS3_HUMAN	40S ribosomal protein S3 OS=Homo sapiens GN=RPS3 PE=1 SV=2	BPIB1_HUMAN	0	0	6	0	0	0	0	0	0	0	0	0	0	1	0	1		P23396	1		P08185	0
1	P07814	SYEP_HUMAN	Bifunctional glutamate/proline--tRNA ligase OS=Homo sapiens GN=EPRS PE=1 SV=5	FPRP_HUMAN	0	0	2	0	0	0	0	0	0	0	0	0	0	1	0	1		P07814	1		O43396	0
1	P27797	CALR_HUMAN	Calreticulin OS=Homo sapiens GN=CALR PE=1 SV=1	PGCB_HUMAN	0	0	0	2	0	0	0	0	0	0	0	0	0	1	0	1		P27797	1		P13646	0
1	O00476	NPT4_HUMAN	Sodium-dependent phosphate transport protein 4 OS=Homo sapiens GN=SLC17A3 PE=1 SV=2	LMAN2_HUMAN	0	0	0	0	0	0	3	3	2	1	3	0	12	0	1	1		O00476	0		Q99574	0
1	O60500	NPHN_HUMAN	Nephrin OS=Homo sapiens GN=NPHS1 PE=1 SV=1	GALNS_HUMAN	0	0	0	0	0	0	3	3	2	0	0	0	8	0	1	1		O60500	0		Q01469	0
1	Q9NRY6	PLS3_HUMAN	Phospholipid scramblase 3 OS=Homo sapiens GN=PLSCR3 PE=1 SV=2	CLM9_HUMAN	0	0	0	0	4	0	1	1	2	2	2	4	8	0	1	1		Q9NRY6	0		P32926	0
1	Q96HP8	T176A_HUMAN	Transmembrane protein 176A OS=Homo sapiens GN=TMEM176A PE=2 SV=1	CANT1_HUMAN	0	0	0	0	0	0	2	0	2	1	2	0	7	0	1	1		Q96HP8	0		Q92520	0
1	Q96J84	KIRR1_HUMAN	Kin of IRRE-like protein 1 OS=Homo sapiens GN=KIRREL PE=1 SV=2	DOP2_HUMAN	0	0	0	0	0	0	1	2	2	0	2	0	7	0	1	1		Q96J84	0		P04424	0
1	P01623	KV305_HUMAN	Ig kappa chain V-III region WOL OS=Homo sapiens PE=1 SV=1	PPIB_HUMAN	0	0	0	0	0	0	5	6	4	0	0	0	15	0	1	1		P01623	0		P05089	0
1	A0M8Q6	LAC7_HUMAN	Ig lambda-7 chain C region OS=Homo sapiens GN=IGLC7 PE=1 SV=2	TAB2_HUMAN	0	0	0	0	0	0	5	0	6	24	0	0	35	0	1	1		A0M8Q6	0		O75841	0
1	Q3YBM2	T176B_HUMAN	Transmembrane protein 176B OS=Homo sapiens GN=TMEM176B PE=2 SV=2	LIPE_HUMAN	0	0	0	0	0	0	0	0	8	5	3	0	16	0	1	1		Q3YBM2	0		Q687X5	0
1	Q1MSJ5	CSPP1_HUMAN	Centrosome and spindle pole-associated protein 1 OS=Homo sapiens GN=CSPP1 PE=1 SV=4	PDCD6_HUMAN	0	0	0	0	0	0	2	2	1	0	0	0	5	0	1	1		Q1MSJ5	0		Q9NQX4	0
1	P01116	RASK_HUMAN	GTPase KRas OS=Homo sapiens GN=KRAS PE=1 SV=1	MSMB_HUMAN	0	0	0	0	0	0	2	1	2	0	0	0	5	0	1	1		P01116	0		O15296	0
1	Q9NUQ9	FA49B_HUMAN	Protein FAM49B OS=Homo sapiens GN=FAM49B PE=1 SV=1	EPHA1_HUMAN	0	0	0	0	0	0	2	1	2	0	1	0	6	0	1	1		Q9NUQ9	0		Q9NP72	0
1	P18462	1A25_HUMAN	HLA class I histocompatibility antigen, A-25 alpha chain OS=Homo sapiens GN=HLA-A PE=1 SV=1	LDLR_HUMAN	0	0	0	0	0	0	5	0	3	0	0	0	8	0	1	1		P18462	0		P26842	0
1	Q6P5W5	S39A4_HUMAN	Zinc transporter ZIP4 OS=Homo sapiens GN=SLC39A4 PE=1 SV=3	AMY1_HUMAN	0	0	0	0	6	0	0	0	2	0	2	6	4	0	1	1		Q6P5W5	0		Q8N128	0
1	Q9Y6W5	WASF2_HUMAN	Wiskott-Aldrich syndrome protein family member 2 OS=Homo sapiens GN=WASF2 PE=1 SV=3	ACTBL_HUMAN	0	0	0	0	0	0	2	0	1	0	3	0	6	0	1	1		Q9Y6W5	0		P51159	0
1	Q15758	AAAT_HUMAN	Neutral amino acid transporter B(0) OS=Homo sapiens GN=SLC1A5 PE=1 SV=2	HSP76_HUMAN	0	0	0	0	0	0	0	1	2	1	2	0	6	0	1	1		Q15758	0		P0CG04	0
1	Q86T03	TM55B_HUMAN	Type 1 phosphatidylinositol 4,5-bisphosphate 4-phosphatase OS=Homo sapiens GN=TMEM55B PE=1 SV=1	HRG_HUMAN	0	0	0	0	0	0	0	0	0	2	2	0	4	0	1	1		Q86T03	0		Q06210	0
1	Q9BYE9	CDHR2_HUMAN	Cadherin-related family member 2 OS=Homo sapiens GN=CDHR2 PE=1 SV=2	ENDD1_HUMAN	0	0	0	0	0	0	2	1	0	5	0	0	8	0	1	1		Q9BYE9	0		P54578	0
1	Q9UHI7	S23A1_HUMAN	Solute carrier family 23 member 1 OS=Homo sapiens GN=SLC23A1 PE=1 SV=3	NIBAN_HUMAN	0	0	0	0	0	0	2	1	1	9	0	0	13	0	1	1		Q9UHI7	0		P28907	0
1	O95164	UBL3_HUMAN	Ubiquitin-like protein 3 OS=Homo sapiens GN=UBL3 PE=1 SV=1	MRGRF_HUMAN	0	0	0	0	0	0	2	0	2	0	0	0	4	0	1	1		O95164	0		P60842	0
1	Q96LD4	TRI47_HUMAN	Tripartite motif-containing protein 47 OS=Homo sapiens GN=TRIM47 PE=1 SV=2	FBN1_HUMAN	0	0	0	0	0	0	4	1	1	2	1	0	9	0	1	1		Q96LD4	0		P55327	0
1	Q7L5L3	GDPD3_HUMAN	Glycerophosphodiester phosphodiesterase domain-containing protein 3 OS=Homo sapiens GN=GDPD3 PE=2 SV=3	ATS1_HUMAN	0	0	0	0	0	0	1	0	3	0	2	0	6	0	1	1		Q7L5L3	0		Q969L2	0
1	Q6ZWJ8	KCP_HUMAN	Kielin/chordin-like protein OS=Homo sapiens GN=KCP PE=2 SV=2	RAB3D_HUMAN	0	0	0	0	0	0	0	2	5	0	0	0	7	0	1	1		Q6ZWJ8	0		P12814	0
1	Q9Y6R1	S4A4_HUMAN	Electrogenic sodium bicarbonate cotransporter 1 OS=Homo sapiens GN=SLC4A4 PE=1 SV=1	CSTN1_HUMAN	0	0	0	0	0	0	6	0	0	6	0	0	12	0	1	1		Q9Y6R1	0		Q9NV96	0
1	P27216	ANX13_HUMAN	Annexin A13 OS=Homo sapiens GN=ANXA13 PE=1 SV=3	MELPH_HUMAN	0	0	0	0	0	0	2	0	0	3	0	0	5	0	1	1		P27216	0		Q6IWH7	0
1	P24821	TENA_HUMAN	Tenascin OS=Homo sapiens GN=TNC PE=1 SV=3	DSG1_HUMAN	0	0	0	0	0	0	0	2	1	0	3	0	6	0	1	1		P24821	0		Q8IV36	0
1	Q7Z2W4	ZCCHV_HUMAN	Zinc finger CCCH-type antiviral protein 1 OS=Homo sapiens GN=ZC3HAV1 PE=1 SV=3	CADH1_HUMAN	0	0	0	0	0	0	0	0	1	0	2	0	3	0	1	1		Q7Z2W4	0		P47895	0
1	O15066	KIF3B_HUMAN	Kinesin-like protein KIF3B OS=Homo sapiens GN=KIF3B PE=1 SV=1	IBP5_HUMAN	0	0	0	0	0	0	1	2	1	0	0	0	4	0	1	1		O15066	0		O43581	0
1	P08F94	PKHD1_HUMAN	Fibrocystin OS=Homo sapiens GN=PKHD1 PE=1 SV=1	SAMP_HUMAN	0	0	0	0	0	0	1	0	3	0	0	0	4	0	1	1		P08F94	0		Q99832	0
1	P01111	RASN_HUMAN	GTPase NRas OS=Homo sapiens GN=NRAS PE=1 SV=1	LAMC1_HUMAN	0	0	0	0	0	0	0	0	0	2	0	0	2	0	1	1		P01111	0		O75369	0
1	P48048	KCNJ1_HUMAN	ATP-sensitive inward rectifier potassium channel 1 OS=Homo sapiens GN=KCNJ1 PE=1 SV=1	PLAK_HUMAN	0	0	0	0	0	0	0	0	2	0	0	0	2	0	1	1		P48048	0		P50443	0
1	Q13286	CLN3_HUMAN	Battenin OS=Homo sapiens GN=CLN3 PE=1 SV=1	CPXM2_HUMAN	0	0	0	0	0	0	0	0	0	0	2	0	2	0	1	1		Q13286	0		Q9Y2Q0	0
1	Q6ZQN7	SO4C1_HUMAN	Solute carrier organic anion transporter family member 4C1 OS=Homo sapiens GN=SLCO4C1 PE=1 SV=1	DESP_HUMAN	0	0	0	0	0	0	1	0	0	2	0	0	3	0	1	1		Q6ZQN7	0		O43813	0
1	O60488	ACSL4_HUMAN	Long-chain-fatty-acid--CoA ligase 4 OS=Homo sapiens GN=ACSL4 PE=1 SV=2	THS7A_HUMAN	0	0	0	0	0	0	0	0	0	3	0	0	3	0	1	1		O60488	0		P43490	0
1	O15374	MOT5_HUMAN	Monocarboxylate transporter 5 OS=Homo sapiens GN=SLC16A4 PE=2 SV=1	CPVL_HUMAN	0	0	0	0	0	0	3	1	0	0	0	0	4	0	1	1		O15374	0		Q13938	0
1	P61225	RAP2B_HUMAN	Ras-related protein Rap-2b OS=Homo sapiens GN=RAP2B PE=1 SV=1	HGD_HUMAN	0	0	0	0	0	0	0	0	0	3	0	0	3	0	1	1		P61225	0		P02749	0
1	O00337	S28A1_HUMAN	Sodium/nucleoside cotransporter 1 OS=Homo sapiens GN=SLC28A1 PE=1 SV=2	PA2GA_HUMAN	0	0	0	0	0	0	2	0	0	0	1	0	3	0	1	1		O00337	0		P50991	0
1	Q99571	P2RX4_HUMAN	P2X purinoceptor 4 OS=Homo sapiens GN=P2RX4 PE=1 SV=2	SPSY_HUMAN	0	0	0	0	0	0	0	1	0	3	0	0	4	0	1	1		Q99571	0		P09488	0
1	Q99102	MUC4_HUMAN	Mucin-4 OS=Homo sapiens GN=MUC4 PE=1 SV=4	AK1C3_HUMAN	0	0	0	0	0	0	1	0	3	0	0	0	4	0	1	1		Q99102	0		Q86VP6	0
1	Q9HCH3	CPNE5_HUMAN	Copine-5 OS=Homo sapiens GN=CPNE5 PE=1 SV=2	1A01_HUMAN	0	0	0	0	0	0	0	0	0	3	0	0	3	0	1	1		Q9HCH3	0		Q969T9	0
1	Q8N357	S35F6_HUMAN	Solute carrier family 35 member F6 OS=Homo sapiens GN=SLC35F6 PE=1 SV=1	SIAS_HUMAN	0	0	0	0	0	0	1	0	3	1	1	0	6	0	1	1		Q8N357	0		Q9Y5Z0	0
1	P09327	VILI_HUMAN	Villin-1 OS=Homo sapiens GN=VIL1 PE=1 SV=4	SEPT8_HUMAN	0	0	0	0	0	0	0	1	0	7	0	0	8	0	1	1		P09327	0		P49368	0
1	Q9NRM0	GTR9_HUMAN	Solute carrier family 2, facilitated glucose transporter member 9 OS=Homo sapiens GN=SLC2A9 PE=1 SV=2	RAB1B_HUMAN	0	0	0	0	0	0	2	0	0	0	0	0	2	0	1	1		Q9NRM0	0		O60262	0
1	Q9UHI5	LAT2_HUMAN	Large neutral amino acids transporter small subunit 2 OS=Homo sapiens GN=SLC7A8 PE=1 SV=1	GMPPA_HUMAN	0	0	0	0	0	0	3	0	0	0	0	0	3	0	1	1		Q9UHI5	0		Q8N335	0
1	P21283	VATC1_HUMAN	V-type proton ATPase subunit C 1 OS=Homo sapiens GN=ATP6V1C1 PE=1 SV=4	MATN2_HUMAN	0	0	0	0	0	0	0	0	0	4	0	0	4	0	1	1		P21283	0		Q9NUP9	0
1	Q9UPI3	FLVC2_HUMAN	Feline leukemia virus subgroup C receptor-related protein 2 OS=Homo sapiens GN=FLVCR2 PE=1 SV=1	RAB15_HUMAN	0	0	0	0	0	0	0	0	0	2	0	0	2	0	1	1		Q9UPI3	0		P04066	0
1	P21796	VDAC1_HUMAN	Voltage-dependent anion-selective channel protein 1 OS=Homo sapiens GN=VDAC1 PE=1 SV=2	RB33B_HUMAN	0	0	0	0	0	0	0	1	2	0	0	0	3	0	1	1		P21796	0		O95433	0
1	Q96J02	ITCH_HUMAN	E3 ubiquitin-protein ligase Itchy homolog OS=Homo sapiens GN=ITCH PE=1 SV=2	PCSK1_HUMAN	0	0	0	0	0	0	0	0	0	3	0	0	3	0	1	1		Q96J02	0		Q9NZD2	0
1	P34931	HS71L_HUMAN	Heat shock 70 kDa protein 1-like OS=Homo sapiens GN=HSPA1L PE=1 SV=2	SEM3C_HUMAN	0	0	0	0	0	0	0	0	0	0	6	0	6	0	1	1		P34931	0		Q14240	0
1	P08246	ELNE_HUMAN	Neutrophil elastase OS=Homo sapiens GN=ELANE PE=1 SV=1	FREM2_HUMAN	0	0	0	0	0	0	0	2	0	0	0	0	2	0	1	1		P08246	0		Q5VWZ2	0
1	Q8TCC7	S22A8_HUMAN	Solute carrier family 22 member 8 OS=Homo sapiens GN=SLC22A8 PE=1 SV=1	CROCC_HUMAN	0	0	0	0	0	0	0	0	1	4	0	0	5	0	1	1		Q8TCC7	0		P17655	0
1	P15907	SIAT1_HUMAN	Beta-galactoside alpha-2,6-sialyltransferase 1 OS=Homo sapiens GN=ST6GAL1 PE=1 SV=1	RB27B_HUMAN	0	0	0	0	0	0	1	0	3	0	0	0	4	0	1	1		P15907	0		P40227	0
1	Q8N114	SHSA5_HUMAN	Protein shisa-5 OS=Homo sapiens GN=SHISA5 PE=1 SV=1	UCHL3_HUMAN	0	0	0	0	0	0	1	1	1	0	2	0	5	0	1	1		Q8N114	0		Q15435	0
1	P08311	CATG_HUMAN	Cathepsin G OS=Homo sapiens GN=CTSG PE=1 SV=2	ENOG_HUMAN	0	0	0	0	0	0	0	3	1	0	0	0	4	0	1	1		P08311	0		P19961	0
1	P09603	CSF1_HUMAN	Macrophage colony-stimulating factor 1 OS=Homo sapiens GN=CSF1 PE=1 SV=2	SFRP1_HUMAN	0	0	0	0	0	0	0	1	0	0	3	0	4	0	1	1		P09603	0		Q9UIV8	0
1	Q9HBJ8	TMM27_HUMAN	Collectrin OS=Homo sapiens GN=TMEM27 PE=1 SV=1	VWA7_HUMAN	0	0	0	0	0	0	1	1	0	2	0	0	4	0	1	1		Q9HBJ8	0		P01610	0
1	Q9BZG1	RAB34_HUMAN	Ras-related protein Rab-34 OS=Homo sapiens GN=RAB34 PE=1 SV=1	TCPE_HUMAN	0	0	0	0	0	0	0	0	0	2	1	0	3	0	1	1		Q9BZG1	0		P43251	0
1	P50440	GATM_HUMAN	Glycine amidinotransferase, mitochondrial OS=Homo sapiens GN=GATM PE=1 SV=1	LSR_HUMAN	0	0	0	0	0	0	0	0	3	1	0	0	4	0	1	1		P50440	0		P62736	0
1	Q8TDL5	BPIB1_HUMAN	BPI fold-containing family B member 1 OS=Homo sapiens GN=BPIFB1 PE=1 SV=1	BIN1_HUMAN	0	0	0	0	0	0	1	2	0	1	0	0	4	0	1	1		Q8TDL5	0		P30740	0
1	P34741	SDC2_HUMAN	Syndecan-2 OS=Homo sapiens GN=SDC2 PE=1 SV=2	NQO2_HUMAN	0	0	0	0	0	0	1	2	0	0	0	0	3	0	1	1		P34741	0		Q8TCD5	0
1	O95747	OXSR1_HUMAN	Serine/threonine-protein kinase OSR1 OS=Homo sapiens GN=OXSR1 PE=1 SV=1	KCP_HUMAN	0	0	0	0	0	0	0	0	0	3	0	0	3	0	1	1		O95747	0		Q96P63	0
1	P01613	KV121_HUMAN	Ig kappa chain V-I region Ni OS=Homo sapiens PE=1 SV=1	ANGL3_HUMAN	0	0	0	0	0	0	0	0	0	7	0	0	7	0	1	1		P01613	0		P02652	0
1	P68366	TBA4A_HUMAN	Tubulin alpha-4A chain OS=Homo sapiens GN=TUBA4A PE=1 SV=1	S14L2_HUMAN	0	0	0	0	0	0	0	0	0	8	0	0	8	0	1	1		P68366	0		Q96HE7	0
1	P27169	PON1_HUMAN	Serum paraoxonase/arylesterase 1 OS=Homo sapiens GN=PON1 PE=1 SV=3	APOL4_HUMAN	0	0	0	0	0	0	0	0	0	4	0	0	4	0	1	1		P27169	0		P06280	0
1	P62136	PP1A_HUMAN	Serine/threonine-protein phosphatase PP1-alpha catalytic subunit OS=Homo sapiens GN=PPP1CA PE=1 SV=1	SLUR1_HUMAN	0	0	0	0	3	0	0	0	0	3	0	3	3	0	1	1		P62136	0		P14625	0
1	P02792	FRIL_HUMAN	Ferritin light chain OS=Homo sapiens GN=FTL PE=1 SV=2	PALLD_HUMAN	0	0	0	0	0	0	0	0	0	3	0	0	3	0	1	1		P02792	0		P00736	0
1	O43866	CD5L_HUMAN	CD5 antigen-like OS=Homo sapiens GN=CD5L PE=1 SV=1	LRIQ1_HUMAN	0	0	0	0	0	0	0	0	0	3	0	0	3	0	1	1		O43866	0		Q96MM7	0
1	Q96S37	S22AC_HUMAN	Solute carrier family 22 member 12 OS=Homo sapiens GN=SLC22A12 PE=1 SV=1	GNA12_HUMAN	0	0	0	0	0	0	0	0	0	3	0	0	3	0	1	1		Q96S37	0		P17050	0
1	Q15907	RB11B_HUMAN	Ras-related protein Rab-11B OS=Homo sapiens GN=RAB11B PE=1 SV=4	SDC2_HUMAN	0	0	0	0	0	0	0	0	0	2	0	0	2	0	1	1		Q15907	0		O00757	0
1	Q92930	RAB8B_HUMAN	Ras-related protein Rab-8B OS=Homo sapiens GN=RAB8B PE=1 SV=2	CAR10_HUMAN	0	0	0	0	0	0	0	0	0	4	0	0	4	0	1	1		Q92930	0		O75144	0
1	P06681	CO2_HUMAN	Complement C2 OS=Homo sapiens GN=C2 PE=1 SV=2	B3GN8_HUMAN	0	0	0	0	0	0	0	0	1	5	0	0	6	0	1	1		P06681	0		Q6PCB0	0
1	Q9NSA0	S22AB_HUMAN	Solute carrier family 22 member 11 OS=Homo sapiens GN=SLC22A11 PE=1 SV=1	RPAB1_HUMAN	0	0	0	0	0	0	0	0	0	4	0	0	4	0	1	1		Q9NSA0	0		Q15274	0
1	P13688	CEAM1_HUMAN	Carcinoembryonic antigen-related cell adhesion molecule 1 OS=Homo sapiens GN=CEACAM1 PE=1 SV=2	TSN8_HUMAN	0	0	0	0	0	0	0	0	0	2	0	0	2	0	1	1		P13688	0		Q8N307	0
1	P37235	HPCL1_HUMAN	Hippocalcin-like protein 1 OS=Homo sapiens GN=HPCAL1 PE=1 SV=3	PKP1_HUMAN	0	0	0	0	0	0	0	0	0	2	0	0	2	0	1	1		P37235	0		O75326	0
1	P18085	ARF4_HUMAN	ADP-ribosylation factor 4 OS=Homo sapiens GN=ARF4 PE=1 SV=3	NRP1_HUMAN	0	0	0	0	0	0	0	0	0	5	0	0	5	0	1	1		P18085	0		Q8TB96	0
1	Q16695	H31T_HUMAN	Histone H3.1t OS=Homo sapiens GN=HIST3H3 PE=1 SV=3	LTOR4_HUMAN	0	0	0	0	0	0	0	0	0	2	0	0	2	0	1	1		Q16695	0		P07360	0
1	P28067	DMA_HUMAN	HLA class II histocompatibility antigen, DM alpha chain OS=Homo sapiens GN=HLA-DMA PE=1 SV=1	CBG_HUMAN	0	0	0	0	0	0	0	0	0	2	0	0	2	0	1	1		P28067	0		P04062	0
1	O00401	WASL_HUMAN	Neural Wiskott-Aldrich syndrome protein OS=Homo sapiens GN=WASL PE=1 SV=2	PCTL_HUMAN	0	0	0	0	0	0	0	0	0	2	0	0	2	0	1	1		O00401	0		O60613	0
1	O14672	ADA10_HUMAN	Disintegrin and metalloproteinase domain-containing protein 10 OS=Homo sapiens GN=ADAM10 PE=1 SV=1	RPAP2_HUMAN	0	0	0	0	0	0	0	0	0	2	0	0	2	0	1	1		O14672	0		P00439	0
1	P07148	FABPL_HUMAN	Fatty acid-binding protein, liver OS=Homo sapiens GN=FABP1 PE=1 SV=1	RALYL_HUMAN	0	0	0	0	0	0	0	0	0	4	0	0	4	0	1	1		P07148	0		O95084	0
1	P30046	DOPD_HUMAN	D-dopachrome decarboxylase OS=Homo sapiens GN=DDT PE=1 SV=3	EIF3A_HUMAN	0	0	0	0	0	0	0	0	0	3	0	0	3	0	1	1		P30046	0		Q6UWV6	0
1	P07686	HEXB_HUMAN	Beta-hexosaminidase subunit beta OS=Homo sapiens GN=HEXB PE=1 SV=3	CATL1_HUMAN	0	0	0	0	0	0	1	1	1	2	0	0	5	0	1	1		P07686	0		P52907	0
1	Q9UJ72	ANX10_HUMAN	Annexin A10 OS=Homo sapiens GN=ANXA10 PE=1 SV=3	TXNL1_HUMAN	0	0	0	0	0	0	0	0	0	2	0	0	2	0	1	1		Q9UJ72	0		P35606	0
1	Q99798	ACON_HUMAN	Aconitate hydratase, mitochondrial OS=Homo sapiens GN=ACO2 PE=1 SV=2	PSF1_HUMAN	0	0	0	0	0	0	0	0	3	1	0	0	4	0	1	1		Q99798	0		Q99538	0
1	P36405	ARL3_HUMAN	ADP-ribosylation factor-like protein 3 OS=Homo sapiens GN=ARL3 PE=1 SV=2	RPGF2_HUMAN	0	0	0	0	0	0	0	0	0	2	0	0	2	0	1	1		P36405	0		Q71UI9	0
1	P49788	TIG1_HUMAN	Retinoic acid receptor responder protein 1 OS=Homo sapiens GN=RARRES1 PE=1 SV=2	RHPN2_HUMAN	0	0	0	0	0	0	0	2	1	1	0	0	4	0	1	1		P49788	0		Q9NY97	0
1	P02746	C1QB_HUMAN	Complement C1q subcomponent subunit B OS=Homo sapiens GN=C1QB PE=1 SV=3	OXSR1_HUMAN	0	0	0	0	0	0	0	0	0	2	0	0	2	0	1	1		P02746	0		P13716	0
1	P16930	FAAA_HUMAN	Fumarylacetoacetase OS=Homo sapiens GN=FAH PE=1 SV=2	KS6A1_HUMAN	0	0	0	0	0	0	0	0	0	2	0	0	2	0	1	1		P16930	0		P07237	0
1	P47755	CAZA2_HUMAN	F-actin-capping protein subunit alpha-2 OS=Homo sapiens GN=CAPZA2 PE=1 SV=3	PERM_HUMAN	0	0	0	0	0	0	0	0	0	2	0	0	2	0	1	1		P47755	0		O43155	0
1	P43686	PRS6B_HUMAN	26S protease regulatory subunit 6B OS=Homo sapiens GN=PSMC4 PE=1 SV=2	ITB2_HUMAN	0	0	0	0	0	0	0	0	0	2	0	0	2	0	1	1		P43686	0		P36952	0
1	P07358	CO8B_HUMAN	Complement component C8 beta chain OS=Homo sapiens GN=C8B PE=1 SV=3	K2C6A_HUMAN	0	0	0	0	0	0	0	1	1	2	0	0	4	0	1	1		P07358	0		P04439	0
1	Q9H8S9	MOB1A_HUMAN	MOB kinase activator 1A OS=Homo sapiens GN=MOB1A PE=1 SV=4	KLK13_HUMAN	0	0	0	0	0	0	0	0	0	2	0	0	2	0	1	1		Q9H8S9	0		O00754	0
1	Q08554	DSC1_HUMAN	Desmocollin-1 OS=Homo sapiens GN=DSC1 PE=1 SV=2	PLBL1_HUMAN	0	0	0	0	0	0	0	0	0	2	0	0	2	0	1	1		Q08554	0		P30101	0
1	P02794	FRIH_HUMAN	Ferritin heavy chain OS=Homo sapiens GN=FTH1 PE=1 SV=2	CAP7_HUMAN	0	0	0	0	0	0	0	0	0	4	0	0	4	0	1	1		P02794	0		Q8NI99	0
1	O76082	S22A5_HUMAN	Solute carrier family 22 member 5 OS=Homo sapiens GN=SLC22A5 PE=1 SV=1	K1C13_HUMAN	0	0	0	0	0	0	0	0	0	2	0	0	2	0	1	1		O76082	0		P05120	0
1	P11168	GTR2_HUMAN	Solute carrier family 2, facilitated glucose transporter member 2 OS=Homo sapiens GN=SLC2A2 PE=1 SV=1	H2B1A_HUMAN	0	0	0	0	0	0	2	0	0	1	0	0	3	0	1	1		P11168	0		P18428	0
1	Q9UHG3	PCYOX_HUMAN	Prenylcysteine oxidase 1 OS=Homo sapiens GN=PCYOX1 PE=1 SV=3	NGAL_HUMAN	0	0	0	0	0	0	0	0	0	3	0	0	3	0	1	1		Q9UHG3	0		Q6MZW2	0
1	P54803	GALC_HUMAN	Galactocerebrosidase OS=Homo sapiens GN=GALC PE=1 SV=2	K2C4_HUMAN	0	0	0	0	0	0	0	1	0	2	0	0	3	0	1	1		P54803	0		O95841	0
1	Q9NP91	S6A20_HUMAN	Sodium- and chloride-dependent transporter XTRP3 OS=Homo sapiens GN=SLC6A20 PE=1 SV=1	SPB10_HUMAN	0	0	0	0	0	0	0	0	0	2	0	0	2	0	1	1		Q9NP91	0		P52823	0
1	Q96BM9	ARL8A_HUMAN	ADP-ribosylation factor-like protein 8A OS=Homo sapiens GN=ARL8A PE=1 SV=1	NEUS_HUMAN	0	0	0	0	0	0	0	0	0	2	0	0	2	0	1	1		Q96BM9	0		Q8TF66	0
1	P09914	IFIT1_HUMAN	Interferon-induced protein with tetratricopeptide repeats 1 OS=Homo sapiens GN=IFIT1 PE=1 SV=2	BPI_HUMAN	0	0	0	0	0	0	0	0	0	2	0	0	2	0	1	1		P09914	0		Q6ZVX7	0
1	P01608	KV116_HUMAN	Ig kappa chain V-I region Roy OS=Homo sapiens PE=1 SV=1	TBB4A_HUMAN	0	0	0	0	0	0	0	4	0	0	0	0	4	0	1	1		P01608	0		Q86TX2	0
1	P98172	EFNB1_HUMAN	Ephrin-B1 OS=Homo sapiens GN=EFNB1 PE=1 SV=1	TALDO_HUMAN	0	0	0	0	0	0	2	1	1	0	1	0	5	0	1	1		P98172	0		Q9BRT3	0
1	P01621	KV303_HUMAN	Ig kappa chain V-III region NG9 (Fragment) OS=Homo sapiens PE=1 SV=1	K2C3_HUMAN	0	0	0	0	0	0	0	3	0	0	0	0	3	0	1	1		P01621	0		P00505	0
1	P01604	KV112_HUMAN	Ig kappa chain V-I region Kue OS=Homo sapiens PE=1 SV=1	RETN_HUMAN	0	0	0	0	1	0	0	2	0	0	0	1	2	0	1	1		P01604	0		P06311	0
1	P55291	CAD15_HUMAN	Cadherin-15 OS=Homo sapiens GN=CDH15 PE=1 SV=1	KV201_HUMAN	0	0	0	0	0	0	4	1	0	0	0	0	5	0	1	1		P55291	0		Q15631	0
1	Q9H3K2	GHITM_HUMAN	Growth hormone-inducible transmembrane protein OS=Homo sapiens GN=GHITM PE=1 SV=2	S10A9_HUMAN	0	0	0	0	0	0	0	2	0	0	0	0	2	0	1	1		Q9H3K2	0		Q9H254	0
1	P54793	ARSF_HUMAN	Arylsulfatase F OS=Homo sapiens GN=ARSF PE=1 SV=4	LYSC_HUMAN	0	0	0	0	0	0	0	2	0	0	0	0	2	0	1	1		P54793	0		P20062	0
1	P0CG06	LAC3_HUMAN	Ig lambda-3 chain C regions OS=Homo sapiens GN=IGLC3 PE=1 SV=1	SLPI_HUMAN	0	0	0	0	0	0	16	0	0	0	0	0	16	0	1	1		P0CG06	0		P17342	0
1	Q01459	DIAC_HUMAN	Di-N-acetylchitobiase OS=Homo sapiens GN=CTBS PE=1 SV=1	ECP_HUMAN	0	0	0	0	0	0	3	0	0	0	0	0	3	0	1	1		Q01459	0		P62826	0
1	Q16827	PTPRO_HUMAN	Receptor-type tyrosine-protein phosphatase O OS=Homo sapiens GN=PTPRO PE=1 SV=2	TM11B_HUMAN	0	0	0	0	0	0	2	0	0	0	0	0	2	0	1	1		Q16827	0		O60462	0
1	P18135	KV312_HUMAN	Ig kappa chain V-III region HAH OS=Homo sapiens PE=2 SV=1	PLP2_HUMAN	0	0	0	0	0	0	4	0	0	0	0	0	4	0	1	1		P18135	0		P07305	0
1	P30464	1B15_HUMAN	HLA class I histocompatibility antigen, B-15 alpha chain OS=Homo sapiens GN=HLA-B PE=1 SV=2	FABP5_HUMAN	0	0	0	0	0	0	4	0	0	0	0	0	4	0	1	1		P30464	0		P46926	0
1	P30047	GFRP_HUMAN	GTP cyclohydrolase 1 feedback regulatory protein OS=Homo sapiens GN=GCHFR PE=1 SV=3	LEUK_HUMAN	0	0	0	0	0	0	2	0	0	0	0	0	2	0	1	1		P30047	0		O95450	0
1	Q9Y5Y7	LYVE1_HUMAN	Lymphatic vessel endothelial hyaluronic acid receptor 1 OS=Homo sapiens GN=LYVE1 PE=1 SV=2	PNCB_HUMAN	0	0	0	0	0	0	2	0	0	0	0	0	2	0	1	1		Q9Y5Y7	0		O60603	0
1	Q13630	FCL_HUMAN	GDP-L-fucose synthase OS=Homo sapiens GN=TSTA3 PE=1 SV=1	GTR3_HUMAN	0	0	0	0	0	0	2	0	1	0	0	0	3	0	1	1		Q13630	0		Q11206	0
1	Q8WZ42	TITIN_HUMAN	Titin OS=Homo sapiens GN=TTN PE=1 SV=4	DSG3_HUMAN	0	0	0	0	0	0	2	0	0	0	0	0	2	0	1	1		Q8WZ42	0		Q86SF2	0
1	Q92954	PRG4_HUMAN	Proteoglycan 4 OS=Homo sapiens GN=PRG4 PE=1 SV=2	HPRT_HUMAN	0	0	0	0	0	0	1	0	0	0	2	0	3	0	1	1		Q92954	0		Q08211	0
1	P08138	TNR16_HUMAN	Tumor necrosis factor receptor superfamily member 16 OS=Homo sapiens GN=NGFR PE=1 SV=1	PSB6_HUMAN	0	0	0	0	0	0	0	0	0	0	3	0	3	0	1	1		P08138	0		P30508	0
1	P26992	CNTFR_HUMAN	Ciliary neurotrophic factor receptor subunit alpha OS=Homo sapiens GN=CNTFR PE=1 SV=2	CNFN_HUMAN	0	0	0	0	0	0	0	0	0	0	2	0	2	0	1	1		P26992	0		P23396	0
1	Q9UBR2	CATZ_HUMAN	Cathepsin Z OS=Homo sapiens GN=CTSZ PE=1 SV=1	MMP9_HUMAN	0	0	0	0	0	0	0	0	2	0	0	0	2	0	1	1		Q9UBR2	0		P07814	0
1	Q12983	BNIP3_HUMAN	BCL2/adenovirus E1B 19 kDa protein-interacting protein 3 OS=Homo sapiens GN=BNIP3 PE=1 SV=2	CASPE_HUMAN	0	0	0	0	0	0	0	0	2	0	0	0	2	0	1	1		Q12983	0		P27797	0

## Sheet: Orbitrap-Mascot
Spectral counts																							Spectral counts			Spectral counts
			Control						Cirrhotic
Accession	Entry name	Description	1	2	3	4	5	6	7	8	9	10	11	12	13	14	SUM Ctrl	SUM Cirro	In Ctrl	In Cirro	SUM		Accession	In Ctrl		Accession	In Cirro
P07911	UROM_HUMAN	Uromodulin OS=Homo sapiens GN=UMOD PE=1 SV=1 - [UROM_HUMAN]	18	28	18	23	14	30	11	19	67	10	19	9	58	26	131	219	1	1	2		P07911	1		P07911	1
P01834	IGKC_HUMAN	Ig kappa chain C region OS=Homo sapiens GN=IGKC PE=1 SV=1 - [IGKC_HUMAN]	13	19	12	23	18	24	33	27	37	14	29	30	16	14	109	200	1	1	2		P01834	1		P01834	1
Q9NQ84	GPC5C_HUMAN	G-protein coupled receptor family C group 5 member C OS=Homo sapiens GN=GPRC5C PE=1 SV=2 - [GPC5C_HUMAN]	8	10	11	10	13	5	10	8	7	16	3	14	10	3	57	71	1	1	2		Q9NQ84	1		Q9NQ84	1
P01133	EGF_HUMAN	Pro-epidermal growth factor OS=Homo sapiens GN=EGF PE=1 SV=2 - [EGF_HUMAN]	10	65	20	25	10	0	25	22	11	34	1	7	8	18	130	126	1	1	2		P01133	1		P01133	1
P07355	ANXA2_HUMAN	Annexin A2 OS=Homo sapiens GN=ANXA2 PE=1 SV=2 - [ANXA2_HUMAN]	0	12	0	0	8	12	7	10	0	6	2	6	4	13	32	48	1	1	2		P07355	1		P07355	1
P29972	AQP1_HUMAN	Aquaporin-1 OS=Homo sapiens GN=AQP1 PE=1 SV=3 - [AQP1_HUMAN]	3	2	0	1	3	4	10	6	4	2	2	2	3	2	13	31	1	1	2		P29972	1		P29972	1
P02768	ALBU_HUMAN	Serum albumin OS=Homo sapiens GN=ALB PE=1 SV=2 - [ALBU_HUMAN]	26	28	16	15	25	23	46	17	20	17	18	74	23	20	133	235	1	1	2		P02768	1		P02768	1
P07195	LDHB_HUMAN	L-lactate dehydrogenase B chain OS=Homo sapiens GN=LDHB PE=1 SV=2 - [LDHB_HUMAN]	7	8	5	4	3	2	5	8	3	3	0	2	1	4	29	26	1	1	2		P07195	1		P07195	1
O60494	CUBN_HUMAN	Cubilin OS=Homo sapiens GN=CUBN PE=1 SV=5 - [CUBN_HUMAN]	0	34	7	20	15	11	26	16	0	18	20	40	15	20	87	155	1	1	2		O60494	1		O60494	1
P28799	GRN_HUMAN	Granulins OS=Homo sapiens GN=GRN PE=1 SV=2 - [GRN_HUMAN]	0	2	2	1	0	0	1	2	1	3	5	0	2	3	5	17	1	1	2		P28799	1		P28799	1
P01024	CO3_HUMAN	Complement C3 OS=Homo sapiens GN=C3 PE=1 SV=2 - [CO3_HUMAN]	0	31	10	11	12	1	7	22	1	17	0	23	1	3	65	74	1	1	2		P01024	1		P01024	1
Q14624	ITIH4_HUMAN	Inter-alpha-trypsin inhibitor heavy chain H4 OS=Homo sapiens GN=ITIH4 PE=1 SV=4 - [ITIH4_HUMAN]	5	37	8	23	6	6	10	17	3	13	4	1	4	1	85	53	1	1	2		Q14624	1		Q14624	1
A8K2U0	A2ML1_HUMAN	Alpha-2-macroglobulin-like protein 1 OS=Homo sapiens GN=A2ML1 PE=1 SV=3 - [A2ML1_HUMAN]	0	15	0	0	0	0	0	0	0	0	0	0	0	3	15	3	1	1	2		A8K2U0	1		A8K2U0	1
Q9NZZ3	CHMP5_HUMAN	Charged multivesicular body protein 5 OS=Homo sapiens GN=CHMP5 PE=1 SV=1 - [CHMP5_HUMAN]	10	4	15	7	12	13	13	13	13	13	0	7	10	4	61	73	1	1	2		Q9NZZ3	1		Q9NZZ3	1
P04083	ANXA1_HUMAN	Annexin A1 OS=Homo sapiens GN=ANXA1 PE=1 SV=2 - [ANXA1_HUMAN]	1	15	0	0	2	7	1	7	3	2	0	5	0	8	25	26	1	1	2		P04083	1		P04083	1
P02788	TRFL_HUMAN	Lactotransferrin OS=Homo sapiens GN=LTF PE=1 SV=6 - [TRFL_HUMAN]	0	4	0	0	0	32	6	16	15	5	1	18	1	8	36	70	1	1	2		P02788	1		P02788	1
P05023	AT1A1_HUMAN	Sodium/potassium-transporting ATPase subunit alpha-1 OS=Homo sapiens GN=ATP1A1 PE=1 SV=1 - [AT1A1_HUMAN]	3	0	9	0	5	0	16	13	8	14	0	12	7	5	17	75	1	1	2		P05023	1		P05023	1
P01625	KV402_HUMAN	Ig kappa chain V-IV region Len OS=Homo sapiens PE=1 SV=2 - [KV402_HUMAN]	0	4	2	1	2	4	3	2	3	2	2	3	1	1	13	17	1	1	2		P01625	1		P01625	1
P11142	HSP7C_HUMAN	Heat shock cognate 71 kDa protein OS=Homo sapiens GN=HSPA8 PE=1 SV=1 - [HSP7C_HUMAN]	9	8	4	4	5	11	7	4	0	6	0	15	4	0	41	36	1	1	2		P11142	1		P11142	1
P50995	ANX11_HUMAN	Annexin A11 OS=Homo sapiens GN=ANXA11 PE=1 SV=1 - [ANX11_HUMAN]	7	6	5	4	13	10	5	4	3	6	1	12	9	5	45	45	1	1	2		P50995	1		P50995	1
P10909	CLUS_HUMAN	Clusterin OS=Homo sapiens GN=CLU PE=1 SV=1 - [CLUS_HUMAN]	9	18	8	6	8	8	8	4	2	4	6	3	3	6	57	36	1	1	2		P10909	1		P10909	1
Q12929	EPS8_HUMAN	Epidermal growth factor receptor kinase substrate 8 OS=Homo sapiens GN=EPS8 PE=1 SV=1 - [EPS8_HUMAN]	6	0	8	7	8	5	2	3	2	6	0	3	6	2	34	24	1	1	2		Q12929	1		Q12929	1
Q8IWA5	CTL2_HUMAN	Choline transporter-like protein 2 OS=Homo sapiens GN=SLC44A2 PE=1 SV=3 - [CTL2_HUMAN]	1	2	7	4	3	1	5	1	2	4	1	3	3	2	18	21	1	1	2		Q8IWA5	1		Q8IWA5	1
P01042	KNG1_HUMAN	Kininogen-1 OS=Homo sapiens GN=KNG1 PE=1 SV=2 - [KNG1_HUMAN]	2	25	7	34	4	3	16	10	4	11	2	2	9	9	75	63	1	1	2		P01042	1		P01042	1
P01591	IGJ_HUMAN	Immunoglobulin J chain OS=Homo sapiens GN=IGJ PE=1 SV=4 - [IGJ_HUMAN]	1	8	2	5	5	2	12	11	5	8	1	4	5	3	23	49	1	1	2		P01591	1		P01591	1
P15941	MUC1_HUMAN	Mucin-1 OS=Homo sapiens GN=MUC1 PE=1 SV=3 - [MUC1_HUMAN]	6	5	0	3	1	7	1	1	2	1	0	6	0	0	22	11	1	1	2		P15941	1		P15941	1
P01023	A2MG_HUMAN	Alpha-2-macroglobulin OS=Homo sapiens GN=A2M PE=1 SV=3 - [A2MG_HUMAN]	0	7	2	4	3	0	0	15	0	9	0	41	0	4	16	69	1	1	2		P01023	1		P01023	1
P14618	KPYM_HUMAN	Pyruvate kinase PKM OS=Homo sapiens GN=PKM PE=1 SV=4 - [KPYM_HUMAN]	3	21	11	7	7	8	14	14	3	11	0	4	6	38	57	90	1	1	2		P14618	1		P14618	1
P00558	PGK1_HUMAN	Phosphoglycerate kinase 1 OS=Homo sapiens GN=PGK1 PE=1 SV=3 - [PGK1_HUMAN]	5	14	7	4	5	13	6	2	7	4	0	9	3	9	48	40	1	1	2		P00558	1		P00558	1
P12429	ANXA3_HUMAN	Annexin A3 OS=Homo sapiens GN=ANXA3 PE=1 SV=3 - [ANXA3_HUMAN]	0	0	1	0	0	10	0	3	4	1	0	3	3	1	11	15	1	1	2		P12429	1		P12429	1
P27487	DPP4_HUMAN	Dipeptidyl peptidase 4 OS=Homo sapiens GN=DPP4 PE=1 SV=2 - [DPP4_HUMAN]	7	6	2	2	3	8	7	6	2	0	3	4	2	1	28	25	1	1	2		P27487	1		P27487	1
P0CG05	LAC2_HUMAN	Ig lambda-2 chain C regions OS=Homo sapiens GN=IGLC2 PE=1 SV=1 - [LAC2_HUMAN]	0	0	4	4	0	0	0	0	19	0	0	0	0	5	8	24	1	1	2		P0CG05	1		P0CG05	1
P04745	AMY1_HUMAN	Alpha-amylase 1 OS=Homo sapiens GN=AMY1A PE=1 SV=2 - [AMY1_HUMAN]	1	7	4	0	6	5	11	0	3	7	1	1	6	1	23	30	1	1	2		P04745	1		P04745	1
P09525	ANXA4_HUMAN	Annexin A4 OS=Homo sapiens GN=ANXA4 PE=1 SV=4 - [ANXA4_HUMAN]	6	3	2	1	2	3	16	2	2	5	0	10	4	3	17	42	1	1	2		P09525	1		P09525	1
Q93088	BHMT1_HUMAN	Betaine--homocysteine S-methyltransferase 1 OS=Homo sapiens GN=BHMT PE=1 SV=2 - [BHMT1_HUMAN]	3	9	1	4	5	0	7	6	0	2	1	10	2	4	22	32	1	1	2		Q93088	1		Q93088	1
P29508	SPB3_HUMAN	Serpin B3 OS=Homo sapiens GN=SERPINB3 PE=1 SV=2 - [SPB3_HUMAN]	0	37	3	5	0	0	0	9	0	0	0	0	0	4	45	13	1	1	2		P29508	1		P29508	1
P15144	AMPN_HUMAN	Aminopeptidase N OS=Homo sapiens GN=ANPEP PE=1 SV=4 - [AMPN_HUMAN]	25	26	1	18	12	28	34	20	12	18	3	41	6	7	110	141	1	1	2		P15144	1		P15144	1
P01765	HV304_HUMAN	Ig heavy chain V-III region TIL OS=Homo sapiens PE=1 SV=1 - [HV304_HUMAN]	0	2	4	2	6	1	1	1	6	5	0	3	3	1	15	20	1	1	2		P01765	1		P01765	1
O43633	CHM2A_HUMAN	Charged multivesicular body protein 2a OS=Homo sapiens GN=CHMP2A PE=1 SV=1 - [CHM2A_HUMAN]	4	3	6	2	3	7	8	8	1	4	0	1	3	1	25	26	1	1	2		O43633	1		O43633	1
Q9NZH0	GPC5B_HUMAN	G-protein coupled receptor family C group 5 member B OS=Homo sapiens GN=GPRC5B PE=2 SV=2 - [GPC5B_HUMAN]	2	1	10	3	8	3	6	5	8	3	2	3	6	3	27	36	1	1	2		Q9NZH0	1		Q9NZH0	1
P10253	LYAG_HUMAN	Lysosomal alpha-glucosidase OS=Homo sapiens GN=GAA PE=1 SV=4 - [LYAG_HUMAN]	3	11	2	6	4	0	3	2	1	1	4	4	6	2	26	23	1	1	2		P10253	1		P10253	1
Q08380	LG3BP_HUMAN	Galectin-3-binding protein OS=Homo sapiens GN=LGALS3BP PE=1 SV=1 - [LG3BP_HUMAN]	9	18	5	14	8	14	20	7	5	18	12	15	12	10	68	99	1	1	2		Q08380	1		Q08380	1
P01714	LV301_HUMAN	Ig lambda chain V-III region SH OS=Homo sapiens PE=1 SV=1 - [LV301_HUMAN]	0	2	1	1	4	0	4	2	3	1	0	0	1	1	8	12	1	1	2		P01714	1		P01714	1
O14745	NHRF1_HUMAN	Na(+)/H(+) exchange regulatory cofactor NHE-RF1 OS=Homo sapiens GN=SLC9A3R1 PE=1 SV=4 - [NHRF1_HUMAN]	3	1	2	0	1	1	2	6	2	1	0	7	4	1	8	23	1	1	2		O14745	1		O14745	1
P60709	ACTB_HUMAN	Actin, cytoplasmic 1 OS=Homo sapiens GN=ACTB PE=1 SV=1 - [ACTB_HUMAN]	4	15	6	8	6	11	5	6	2	6	0	21	1	8	50	49	1	1	2		P60709	1		P60709	1
Q96FN5	KIF12_HUMAN	Kinesin-like protein KIF12 OS=Homo sapiens GN=KIF12 PE=2 SV=3 - [KIF12_HUMAN]	2	3	7	4	11	6	3	5	3	6	0	1	4	4	33	26	1	1	2		Q96FN5	1		Q96FN5	1
Q9H444	CHM4B_HUMAN	Charged multivesicular body protein 4b OS=Homo sapiens GN=CHMP4B PE=1 SV=1 - [CHM4B_HUMAN]	4	2	1	2	7	3	2	2	3	2	0	3	1	1	19	14	1	1	2		Q9H444	1		Q9H444	1
P01871	IGHM_HUMAN	Ig mu chain C region OS=Homo sapiens GN=IGHM PE=1 SV=3 - [IGHM_HUMAN]	3	7	2	2	9	5	4	4	6	1	3	11	5	6	28	40	1	1	2		P01871	1		P01871	1
P40121	CAPG_HUMAN	Macrophage-capping protein OS=Homo sapiens GN=CAPG PE=1 SV=2 - [CAPG_HUMAN]	1	2	0	1	0	0	1	2	0	2	0	0	0	8	4	13	1	1	2		P40121	1		P40121	1
Q8WUM4	PDC6I_HUMAN	Programmed cell death 6-interacting protein OS=Homo sapiens GN=PDCD6IP PE=1 SV=1 - [PDC6I_HUMAN]	21	7	4	4	10	18	15	2	1	5	1	20	5	2	64	51	1	1	2		Q8WUM4	1		Q8WUM4	1
Q96FZ7	CHMP6_HUMAN	Charged multivesicular body protein 6 OS=Homo sapiens GN=CHMP6 PE=1 SV=3 - [CHMP6_HUMAN]	2	0	3	1	5	2	3	0	0	2	0	2	1	2	13	10	1	1	2		Q96FZ7	1		Q96FZ7	1
O00526	UPK2_HUMAN	Uroplakin-2 OS=Homo sapiens GN=UPK2 PE=2 SV=2 - [UPK2_HUMAN]	2	0	3	1	3	2	2	3	0	1	0	0	4	0	11	10	1	1	2		O00526	1		O00526	1
Q9Y5K6	CD2AP_HUMAN	CD2-associated protein OS=Homo sapiens GN=CD2AP PE=1 SV=1 - [CD2AP_HUMAN]	0	0	4	0	2	0	3	3	2	4	0	2	2	0	6	16	1	1	2		Q9Y5K6	1		Q9Y5K6	1
P01620	KV302_HUMAN	Ig kappa chain V-III region SIE OS=Homo sapiens PE=1 SV=1 - [KV302_HUMAN]	0	0	0	0	0	2	2	0	0	2	4	4	0	3	2	15	1	1	2		P01620	1		P01620	1
P05109	S10A8_HUMAN	Protein S100-A8 OS=Homo sapiens GN=S100A8 PE=1 SV=1 - [S10A8_HUMAN]	0	24	0	1	0	0	0	2	0	0	0	1	0	3	25	6	1	1	2		P05109	1		P05109	1
P04264	K2C1_HUMAN	Keratin, type II cytoskeletal 1 OS=Homo sapiens GN=KRT1 PE=1 SV=6 - [K2C1_HUMAN]	18	7	4	2	6	11	4	4	2	2	23	7	3	4	48	49	1	1	2		P04264	1		P04264	1
O43895	XPP2_HUMAN	Xaa-Pro aminopeptidase 2 OS=Homo sapiens GN=XPNPEP2 PE=1 SV=3 - [XPP2_HUMAN]	3	2	0	3	1	3	11	9	1	3	0	18	3	0	12	45	1	1	2		O43895	1		O43895	1
A6NGU5	GGT3_HUMAN	Putative gamma-glutamyltranspeptidase 3 OS=Homo sapiens GN=GGT3P PE=5 SV=2 - [GGT3_HUMAN]	0	0	2	1	2	0	0	4	2	4	6	0	2	5	5	23	1	1	2		A6NGU5	1		A6NGU5	1
Q6UVK1	CSPG4_HUMAN	Chondroitin sulfate proteoglycan 4 OS=Homo sapiens GN=CSPG4 PE=1 SV=2 - [CSPG4_HUMAN]	1	3	2	2	0	0	2	6	0	1	0	0	2	0	8	11	1	1	2		Q6UVK1	1		Q6UVK1	1
P15311	EZRI_HUMAN	Ezrin OS=Homo sapiens GN=EZR PE=1 SV=4 - [EZRI_HUMAN]	5	5	3	0	4	5	4	4	0	2	0	11	3	0	22	24	1	1	2		P15311	1		P15311	1
P0CG48	UBC_HUMAN	Polyubiquitin-C OS=Homo sapiens GN=UBC PE=1 SV=3 - [UBC_HUMAN]	3	4	4	2	6	4	5	5	3	5	0	2	3	2	23	25	1	1	2		P0CG48	1		P0CG48	1
O43490	PROM1_HUMAN	Prominin-1 OS=Homo sapiens GN=PROM1 PE=1 SV=1 - [PROM1_HUMAN]	9	5	1	2	7	13	5	7	3	7	0	18	4	4	37	48	1	1	2		O43490	1		O43490	1
P80723	BASP1_HUMAN	Brain acid soluble protein 1 OS=Homo sapiens GN=BASP1 PE=1 SV=2 - [BASP1_HUMAN]	0	0	4	1	2	6	6	6	5	2	0	0	4	0	13	23	1	1	2		P80723	1		P80723	1
P59665	DEF1_HUMAN	Neutrophil defensin 1 OS=Homo sapiens GN=DEFA1 PE=1 SV=1 - [DEF1_HUMAN]	1	1	3	0	0	1	0	1	3	0	2	0	0	3	6	9	1	1	2		P59665	1		P59665	1
O00161	SNP23_HUMAN	Synaptosomal-associated protein 23 OS=Homo sapiens GN=SNAP23 PE=1 SV=1 - [SNP23_HUMAN]	1	0	0	0	0	2	1	0	0	0	0	3	1	0	3	5	1	1	2		O00161	1		O00161	1
P01857	IGHG1_HUMAN	Ig gamma-1 chain C region OS=Homo sapiens GN=IGHG1 PE=1 SV=1 - [IGHG1_HUMAN]	1	11	7	11	5	6	11	14	9	9	7	20	12	11	41	93	1	1	2		P01857	1		P01857	1
P00450	CERU_HUMAN	Ceruloplasmin OS=Homo sapiens GN=CP PE=1 SV=1 - [CERU_HUMAN]	0	25	6	10	6	1	34	12	14	11	5	12	4	1	48	93	1	1	2		P00450	1		P00450	1
O00159	MYO1C_HUMAN	Unconventional myosin-Ic OS=Homo sapiens GN=MYO1C PE=1 SV=4 - [MYO1C_HUMAN]	6	0	6	2	1	9	5	2	1	2	0	6	1	1	24	18	1	1	2		O00159	1		O00159	1
Q9UKR3	KLK13_HUMAN	Kallikrein-13 OS=Homo sapiens GN=KLK13 PE=1 SV=1 - [KLK13_HUMAN]	0	2	0	0	0	0	0	0	0	0	0	0	0	2	2	2	1	1	2		Q9UKR3	1		Q9UKR3	1
P22792	CPN2_HUMAN	Carboxypeptidase N subunit 2 OS=Homo sapiens GN=CPN2 PE=1 SV=3 - [CPN2_HUMAN]	1	6	1	5	1	1	2	2	0	5	0	0	0	0	15	9	1	1	2		P22792	1		P22792	1
P00738	HPT_HUMAN	Haptoglobin OS=Homo sapiens GN=HP PE=1 SV=1 - [HPT_HUMAN]	0	0	0	0	4	0	1	0	0	0	4	0	0	0	4	5	1	1	2		P00738	1		P00738	1
P98164	LRP2_HUMAN	Low-density lipoprotein receptor-related protein 2 OS=Homo sapiens GN=LRP2 PE=1 SV=3 - [LRP2_HUMAN]	1	47	16	34	12	6	31	18	16	11	37	95	14	24	116	246	1	1	2		P98164	1		P98164	1
P51148	RAB5C_HUMAN	Ras-related protein Rab-5C OS=Homo sapiens GN=RAB5C PE=1 SV=2 - [RAB5C_HUMAN]	2	0	1	0	1	2	3	1	1	1	0	2	1	2	6	11	1	1	2		P51148	1		P51148	1
P02787	TRFE_HUMAN	Serotransferrin OS=Homo sapiens GN=TF PE=1 SV=3 - [TRFE_HUMAN]	2	7	4	9	6	10	8	4	3	2	9	26	4	2	38	58	1	1	2		P02787	1		P02787	1
Q14254	FLOT2_HUMAN	Flotillin-2 OS=Homo sapiens GN=FLOT2 PE=1 SV=2 - [FLOT2_HUMAN]	1	0	0	0	4	2	5	3	0	2	0	6	4	2	7	22	1	1	2		Q14254	1		Q14254	1
P15309	PPAP_HUMAN	Prostatic acid phosphatase OS=Homo sapiens GN=ACPP PE=1 SV=3 - [PPAP_HUMAN]	0	7	3	5	3	4	2	2	0	2	0	1	2	2	22	11	1	1	2		P15309	1		P15309	1
Q12913	PTPRJ_HUMAN	Receptor-type tyrosine-protein phosphatase eta OS=Homo sapiens GN=PTPRJ PE=1 SV=3 - [PTPRJ_HUMAN]	1	0	5	3	0	1	0	0	0	0	0	4	6	1	10	11	1	1	2		Q12913	1		Q12913	1
P35030	TRY3_HUMAN	Trypsin-3 OS=Homo sapiens GN=PRSS3 PE=1 SV=2 - [TRY3_HUMAN]	3	0	2	1	4	3	1	1	3	1	8	0	2	9	13	25	1	1	2		P35030	1		P35030	1
P01859	IGHG2_HUMAN	Ig gamma-2 chain C region OS=Homo sapiens GN=IGHG2 PE=1 SV=2 - [IGHG2_HUMAN]	1	9	5	3	4	0	8	4	0	6	6	22	0	2	22	48	1	1	2		P01859	1		P01859	1
P01034	CYTC_HUMAN	Cystatin-C OS=Homo sapiens GN=CST3 PE=1 SV=1 - [CYTC_HUMAN]	2	3	2	1	1	0	0	2	2	1	0	1	3	3	9	12	1	1	2		P01034	1		P01034	1
P01833	PIGR_HUMAN	Polymeric immunoglobulin receptor OS=Homo sapiens GN=PIGR PE=1 SV=4 - [PIGR_HUMAN]	3	20	5	15	8	5	21	17	0	11	6	15	16	5	56	91	1	1	2		P01833	1		P01833	1
P11279	LAMP1_HUMAN	Lysosome-associated membrane glycoprotein 1 OS=Homo sapiens GN=LAMP1 PE=1 SV=3 - [LAMP1_HUMAN]	2	0	0	0	1	0	1	1	0	2	2	1	0	2	3	9	1	1	2		P11279	1		P11279	1
P26038	MOES_HUMAN	Moesin OS=Homo sapiens GN=MSN PE=1 SV=3 - [MOES_HUMAN]	0	1	5	3	7	0	5	7	0	5	0	9	5	0	16	31	1	1	2		P26038	1		P26038	1
Q9H6S3	ES8L2_HUMAN	Epidermal growth factor receptor kinase substrate 8-like protein 2 OS=Homo sapiens GN=EPS8L2 PE=1 SV=2 - [ES8L2_HUMAN]	0	0	0	2	1	0	4	3	1	6	0	7	3	0	3	24	1	1	2		Q9H6S3	1		Q9H6S3	1
Q9BW04	SARG_HUMAN	Specifically androgen-regulated gene protein OS=Homo sapiens GN=SARG PE=1 SV=2 - [SARG_HUMAN]	0	0	5	2	0	0	5	6	0	5	0	2	4	0	7	22	1	1	2		Q9BW04	1		Q9BW04	1
Q6EMK4	VASN_HUMAN	Vasorin OS=Homo sapiens GN=VASN PE=1 SV=1 - [VASN_HUMAN]	10	14	6	8	5	5	6	6	4	4	2	0	4	2	48	28	1	1	2		Q6EMK4	1		Q6EMK4	1
O00391	QSOX1_HUMAN	Sulfhydryl oxidase 1 OS=Homo sapiens GN=QSOX1 PE=1 SV=3 - [QSOX1_HUMAN]	0	9	2	4	2	0	4	3	0	6	0	0	3	1	17	17	1	1	2		O00391	1		O00391	1
P98160	PGBM_HUMAN	Basement membrane-specific heparan sulfate proteoglycan core protein OS=Homo sapiens GN=HSPG2 PE=1 SV=4 - [PGBM_HUMAN]	4	12	5	11	4	2	4	16	1	13	4	0	12	1	38	51	1	1	2		P98160	1		P98160	1
Q14393	GAS6_HUMAN	Growth arrest-specific protein 6 OS=Homo sapiens GN=GAS6 PE=1 SV=2 - [GAS6_HUMAN]	0	12	3	11	0	0	0	4	1	1	0	0	0	4	26	10	1	1	2		Q14393	1		Q14393	1
Q9BVM4	GGACT_HUMAN	Gamma-glutamylaminecyclotransferase OS=Homo sapiens GN=GGACT PE=1 SV=2 - [GGACT_HUMAN]	0	3	0	0	0	0	2	2	0	1	0	0	1	1	3	7	1	1	2		Q9BVM4	1		Q9BVM4	1
P23526	SAHH_HUMAN	Adenosylhomocysteinase OS=Homo sapiens GN=AHCY PE=1 SV=4 - [SAHH_HUMAN]	0	3	2	0	0	0	0	0	0	0	0	2	0	0	5	2	1	1	2		P23526	1		P23526	1
O75955	FLOT1_HUMAN	Flotillin-1 OS=Homo sapiens GN=FLOT1 PE=1 SV=3 - [FLOT1_HUMAN]	3	0	1	1	4	1	2	3	3	2	0	3	1	0	10	14	1	1	2		O75955	1		O75955	1
O15393	TMPS2_HUMAN	Transmembrane protease serine 2 OS=Homo sapiens GN=TMPRSS2 PE=1 SV=3 - [TMPS2_HUMAN]	1	0	3	1	1	10	3	0	2	2	0	1	2	1	16	11	1	1	2		O15393	1		O15393	1
P62258	1433E_HUMAN	14-3-3 protein epsilon OS=Homo sapiens GN=YWHAE PE=1 SV=1 - [1433E_HUMAN]	0	6	1	2	1	7	1	0	0	1	0	6	1	1	17	10	1	1	2		P62258	1		P62258	1
P05154	IPSP_HUMAN	Plasma serine protease inhibitor OS=Homo sapiens GN=SERPINA5 PE=1 SV=3 - [IPSP_HUMAN]	6	68	7	23	6	10	14	17	11	30	1	9	5	10	120	97	1	1	2		P05154	1		P05154	1
P05090	APOD_HUMAN	Apolipoprotein D OS=Homo sapiens GN=APOD PE=1 SV=1 - [APOD_HUMAN]	5	5	4	3	3	3	1	0	2	4	6	2	2	1	23	18	1	1	2		P05090	1		P05090	1
P51178	PLCD1_HUMAN	1-phosphatidylinositol 4,5-bisphosphate phosphodiesterase delta-1 OS=Homo sapiens GN=PLCD1 PE=1 SV=2 - [PLCD1_HUMAN]	1	0	4	0	2	2	1	2	0	1	0	0	2	0	9	6	1	1	2		P51178	1		P51178	1
P05062	ALDOB_HUMAN	Fructose-bisphosphate aldolase B OS=Homo sapiens GN=ALDOB PE=1 SV=2 - [ALDOB_HUMAN]	5	11	4	2	4	6	5	3	2	1	1	5	2	5	32	24	1	1	2		P05062	1		P05062	1
P62937	PPIA_HUMAN	Peptidyl-prolyl cis-trans isomerase A OS=Homo sapiens GN=PPIA PE=1 SV=2 - [PPIA_HUMAN]	2	5	3	1	2	6	2	2	1	2	1	5	2	2	19	17	1	1	2		P62937	1		P62937	1
P49006	MRP_HUMAN	MARCKS-related protein OS=Homo sapiens GN=MARCKSL1 PE=1 SV=2 - [MRP_HUMAN]	1	0	3	0	0	0	0	1	0	1	0	1	3	0	4	6	1	1	2		P49006	1		P49006	1
P07339	CATD_HUMAN	Cathepsin D OS=Homo sapiens GN=CTSD PE=1 SV=1 - [CATD_HUMAN]	1	9	2	3	4	0	3	6	0	2	3	2	2	7	19	25	1	1	2		P07339	1		P07339	1
P00918	CAH2_HUMAN	Carbonic anhydrase 2 OS=Homo sapiens GN=CA2 PE=1 SV=2 - [CAH2_HUMAN]	2	8	0	0	0	1	2	3	1	2	0	2	0	0	11	10	1	1	2		P00918	1		P00918	1
P00491	PNPH_HUMAN	Purine nucleoside phosphorylase OS=Homo sapiens GN=PNP PE=1 SV=2 - [PNPH_HUMAN]	0	7	1	1	1	1	0	0	0	0	0	0	0	3	11	3	1	1	2		P00491	1		P00491	1
O00468	AGRIN_HUMAN	Agrin OS=Homo sapiens GN=AGRN PE=1 SV=5 - [AGRIN_HUMAN]	0	8	2	13	0	0	13	22	1	32	0	0	1	5	23	74	1	1	2		O00468	1		O00468	1
P08183	MDR1_HUMAN	Multidrug resistance protein 1 OS=Homo sapiens GN=ABCB1 PE=1 SV=3 - [MDR1_HUMAN]	4	0	2	6	8	7	2	5	1	3	0	6	5	2	27	24	1	1	2		P08183	1		P08183	1
P63104	1433Z_HUMAN	14-3-3 protein zeta/delta OS=Homo sapiens GN=YWHAZ PE=1 SV=1 - [1433Z_HUMAN]	6	7	1	2	2	7	4	2	0	3	0	6	1	4	25	20	1	1	2		P63104	1		P63104	1
Q9UN37	VPS4A_HUMAN	Vacuolar protein sorting-associated protein 4A OS=Homo sapiens GN=VPS4A PE=1 SV=1 - [VPS4A_HUMAN]	0	1	4	1	4	4	5	3	0	4	0	1	3	2	14	18	1	1	2		Q9UN37	1		Q9UN37	1
P35321	SPR1A_HUMAN	Cornifin-A OS=Homo sapiens GN=SPRR1A PE=1 SV=2 - [SPR1A_HUMAN]	0	0	3	1	0	0	0	1	0	0	0	0	0	3	4	4	1	1	2		P35321	1		P35321	1
P06396	GELS_HUMAN	Gelsolin OS=Homo sapiens GN=GSN PE=1 SV=1 - [GELS_HUMAN]	1	10	1	10	0	1	1	5	1	8	0	7	2	2	23	26	1	1	2		P06396	1		P06396	1
Q13510	ASAH1_HUMAN	Acid ceramidase OS=Homo sapiens GN=ASAH1 PE=1 SV=5 - [ASAH1_HUMAN]	0	4	1	1	2	0	2	6	1	1	1	4	0	2	8	17	1	1	2		Q13510	1		Q13510	1
Q96EY5	MB12A_HUMAN	Multivesicular body subunit 12A OS=Homo sapiens GN=MVB12A PE=1 SV=1 - [MB12A_HUMAN]	3	1	2	1	2	4	4	5	3	5	0	3	2	0	13	22	1	1	2		Q96EY5	1		Q96EY5	1
P23528	COF1_HUMAN	Cofilin-1 OS=Homo sapiens GN=CFL1 PE=1 SV=3 - [COF1_HUMAN]	0	1	0	0	1	2	1	1	0	0	0	3	2	1	4	8	1	1	2		P23528	1		P23528	1
P00338	LDHA_HUMAN	L-lactate dehydrogenase A chain OS=Homo sapiens GN=LDHA PE=1 SV=2 - [LDHA_HUMAN]	4	6	2	2	3	1	0	3	0	0	1	1	0	8	18	13	1	1	2		P00338	1		P00338	1
Q53TN4	CYBR1_HUMAN	Cytochrome b reductase 1 OS=Homo sapiens GN=CYBRD1 PE=1 SV=1 - [CYBR1_HUMAN]	1	1	1	2	2	0	1	3	2	2	0	0	4	1	7	13	1	1	2		Q53TN4	1		Q53TN4	1
O00560	SDCB1_HUMAN	Syntenin-1 OS=Homo sapiens GN=SDCBP PE=1 SV=1 - [SDCB1_HUMAN]	0	10	1	1	2	6	7	3	3	0	0	11	2	0	20	26	1	1	2		O00560	1		O00560	1
Q03403	TFF2_HUMAN	Trefoil factor 2 OS=Homo sapiens GN=TFF2 PE=1 SV=2 - [TFF2_HUMAN]	5	0	5	5	6	0	4	3	7	7	10	2	9	8	21	50	1	1	2		Q03403	1		Q03403	1
P08754	GNAI3_HUMAN	Guanine nucleotide-binding protein G(k) subunit alpha OS=Homo sapiens GN=GNAI3 PE=1 SV=3 - [GNAI3_HUMAN]	4	0	0	0	3	5	0	0	0	0	0	9	3	0	12	12	1	1	2		P08754	1		P08754	1
P01597	KV105_HUMAN	Ig kappa chain V-I region DEE OS=Homo sapiens PE=1 SV=1 - [KV105_HUMAN]	2	0	0	2	1	0	4	4	0	4	0	10	0	0	5	22	1	1	2		P01597	1		P01597	1
P0C0L4	CO4A_HUMAN	Complement C4-A OS=Homo sapiens GN=C4A PE=1 SV=2 - [CO4A_HUMAN]	4	15	0	7	0	0	5	8	5	5	0	4	3	3	26	33	1	1	2		P0C0L4	1		P0C0L4	1
P00749	UROK_HUMAN	Urokinase-type plasminogen activator OS=Homo sapiens GN=PLAU PE=1 SV=2 - [UROK_HUMAN]	0	13	2	3	0	0	2	5	0	7	0	0	0	5	18	19	1	1	2		P00749	1		P00749	1
O96009	NAPSA_HUMAN	Napsin-A OS=Homo sapiens GN=NAPSA PE=1 SV=1 - [NAPSA_HUMAN]	5	2	3	1	4	4	3	3	3	3	3	6	3	4	19	28	1	1	2		O96009	1		O96009	1
P50895	BCAM_HUMAN	Basal cell adhesion molecule OS=Homo sapiens GN=BCAM PE=1 SV=2 - [BCAM_HUMAN]	0	2	3	4	3	1	7	2	1	11	0	0	5	0	13	26	1	1	2		P50895	1		P50895	1
P01876	IGHA1_HUMAN	Ig alpha-1 chain C region OS=Homo sapiens GN=IGHA1 PE=1 SV=2 - [IGHA1_HUMAN]	0	23	4	14	6	6	10	11	8	10	6	17	8	7	53	77	1	1	2		P01876	1		P01876	1
Q9BQE3	TBA1C_HUMAN	Tubulin alpha-1C chain OS=Homo sapiens GN=TUBA1C PE=1 SV=1 - [TBA1C_HUMAN]	1	3	5	0	0	5	0	1	0	2	0	4	1	1	14	9	1	1	2		Q9BQE3	1		Q9BQE3	1
P60953	CDC42_HUMAN	Cell division control protein 42 homolog OS=Homo sapiens GN=CDC42 PE=1 SV=2 - [CDC42_HUMAN]	1	2	1	1	1	1	1	2	0	3	1	2	2	0	7	11	1	1	2		P60953	1		P60953	1
O43451	MGA_HUMAN	Maltase-glucoamylase, intestinal OS=Homo sapiens GN=MGAM PE=1 SV=5 - [MGA_HUMAN]	0	0	2	2	2	0	2	2	3	2	2	8	4	1	6	24	1	1	2		O43451	1		O43451	1
P10451	OSTP_HUMAN	Osteopontin OS=Homo sapiens GN=SPP1 PE=1 SV=1 - [OSTP_HUMAN]	9	4	9	27	7	4	10	6	3	10	16	0	7	5	60	57	1	1	2		P10451	1		P10451	1
Q96HE7	ERO1A_HUMAN	ERO1-like protein alpha OS=Homo sapiens GN=ERO1L PE=1 SV=2 - [ERO1A_HUMAN]	0	2	0	0	0	0	0	0	0	0	0	0	0	2	2	2	1	1	2		Q96HE7	1		Q96HE7	1
P01743	HV102_HUMAN	Ig heavy chain V-I region HG3 OS=Homo sapiens PE=4 SV=1 - [HV102_HUMAN]	0	2	0	1	1	0	1	1	0	2	1	2	1	2	4	10	1	1	2		P01743	1		P01743	1
P40925	MDHC_HUMAN	Malate dehydrogenase, cytoplasmic OS=Homo sapiens GN=MDH1 PE=1 SV=4 - [MDHC_HUMAN]	4	5	1	2	0	0	3	1	1	2	0	2	2	4	12	15	1	1	2		P40925	1		P40925	1
Q9UHR4	BI2L1_HUMAN	Brain-specific angiogenesis inhibitor 1-associated protein 2-like protein 1 OS=Homo sapiens GN=BAIAP2L1 PE=1 SV=2 - [BI2L1_HUMAN]	3	0	3	3	1	0	1	0	0	2	0	2	2	0	10	7	1	1	2		Q9UHR4	1		Q9UHR4	1
Q12805	FBLN3_HUMAN	EGF-containing fibulin-like extracellular matrix protein 1 OS=Homo sapiens GN=EFEMP1 PE=1 SV=2 - [FBLN3_HUMAN]	4	11	9	14	7	0	2	18	0	9	8	4	6	3	45	50	1	1	2		Q12805	1		Q12805	1
P12109	CO6A1_HUMAN	Collagen alpha-1(VI) chain OS=Homo sapiens GN=COL6A1 PE=1 SV=3 - [CO6A1_HUMAN]	4	31	3	11	2	0	8	6	0	4	0	0	2	1	51	21	1	1	2		P12109	1		P12109	1
P02760	AMBP_HUMAN	Protein AMBP OS=Homo sapiens GN=AMBP PE=1 SV=1 - [AMBP_HUMAN]	10	12	8	17	14	23	38	16	16	29	42	0	12	12	84	165	1	1	2		P02760	1		P02760	1
P30626	SORCN_HUMAN	Sorcin OS=Homo sapiens GN=SRI PE=1 SV=1 - [SORCN_HUMAN]	1	0	0	0	4	1	0	0	0	0	0	3	0	0	6	3	1	1	2		P30626	1		P30626	1
Q5VW32	BROX_HUMAN	BRO1 domain-containing protein BROX OS=Homo sapiens GN=BROX PE=1 SV=1 - [BROX_HUMAN]	7	5	3	5	12	6	9	5	2	5	1	5	2	1	38	30	1	1	2		Q5VW32	1		Q5VW32	1
P08473	NEP_HUMAN	Neprilysin OS=Homo sapiens GN=MME PE=1 SV=2 - [NEP_HUMAN]	9	8	2	3	6	18	10	9	1	2	7	25	8	5	46	67	1	1	2		P08473	1		P08473	1
P54707	AT12A_HUMAN	Potassium-transporting ATPase alpha chain 2 OS=Homo sapiens GN=ATP12A PE=1 SV=3 - [AT12A_HUMAN]	1	0	3	1	0	0	2	3	0	2	0	0	2	0	5	9	1	1	2		P54707	1		P54707	1
P38606	VATA_HUMAN	V-type proton ATPase catalytic subunit A OS=Homo sapiens GN=ATP6V1A PE=1 SV=2 - [VATA_HUMAN]	2	0	0	0	0	0	3	0	0	1	0	8	1	0	2	13	1	1	2		P38606	1		P38606	1
Q9NZP8	C1RL_HUMAN	Complement C1r subcomponent-like protein OS=Homo sapiens GN=C1RL PE=1 SV=2 - [C1RL_HUMAN]	0	1	7	4	3	0	7	2	0	2	0	0	2	0	15	13	1	1	2		Q9NZP8	1		Q9NZP8	1
P11021	GRP78_HUMAN	78 kDa glucose-regulated protein OS=Homo sapiens GN=HSPA5 PE=1 SV=2 - [GRP78_HUMAN]	0	5	0	2	0	0	2	1	0	1	0	0	0	2	7	6	1	1	2		P11021	1		P11021	1
O00322	UPK1A_HUMAN	Uroplakin-1a OS=Homo sapiens GN=UPK1A PE=2 SV=1 - [UPK1A_HUMAN]	8	0	1	1	3	5	3	1	0	0	0	0	0	0	18	4	1	1	2		O00322	1		O00322	1
P04792	HSPB1_HUMAN	Heat shock protein beta-1 OS=Homo sapiens GN=HSPB1 PE=1 SV=2 - [HSPB1_HUMAN]	1	1	2	3	0	0	1	2	0	0	0	2	0	1	7	6	1	1	2		P04792	1		P04792	1
O43653	PSCA_HUMAN	Prostate stem cell antigen OS=Homo sapiens GN=PSCA PE=1 SV=1 - [PSCA_HUMAN]	4	1	1	1	0	4	4	6	0	1	0	3	3	0	11	17	1	1	2		O43653	1		O43653	1
Q8WV92	MITD1_HUMAN	MIT domain-containing protein 1 OS=Homo sapiens GN=MITD1 PE=1 SV=1 - [MITD1_HUMAN]	2	1	1	2	1	1	3	3	1	1	0	3	2	0	8	13	1	1	2		Q8WV92	1		Q8WV92	1
P22732	GTR5_HUMAN	Solute carrier family 2, facilitated glucose transporter member 5 OS=Homo sapiens GN=SLC2A5 PE=1 SV=1 - [GTR5_HUMAN]	2	2	0	1	1	3	9	4	1	3	0	3	1	2	9	23	1	1	2		P22732	1		P22732	1
Q96KP4	CNDP2_HUMAN	Cytosolic non-specific dipeptidase OS=Homo sapiens GN=CNDP2 PE=1 SV=2 - [CNDP2_HUMAN]	0	13	2	3	0	2	4	3	0	2	0	2	2	1	20	14	1	1	2		Q96KP4	1		Q96KP4	1
Q9H3G5	CPVL_HUMAN	Probable serine carboxypeptidase CPVL OS=Homo sapiens GN=CPVL PE=1 SV=2 - [CPVL_HUMAN]	0	7	0	1	0	0	0	3	0	2	1	3	0	1	8	10	1	1	2		Q9H3G5	1		Q9H3G5	1
P04196	HRG_HUMAN	Histidine-rich glycoprotein OS=Homo sapiens GN=HRG PE=1 SV=1 - [HRG_HUMAN]	0	6	0	0	0	0	2	2	2	2	0	3	0	0	6	11	1	1	2		P04196	1		P04196	1
P08174	DAF_HUMAN	Complement decay-accelerating factor OS=Homo sapiens GN=CD55 PE=1 SV=4 - [DAF_HUMAN]	0	0	1	0	0	2	1	1	0	0	2	0	2	0	3	6	1	1	2		P08174	1		P08174	1
P80188	NGAL_HUMAN	Neutrophil gelatinase-associated lipocalin OS=Homo sapiens GN=LCN2 PE=1 SV=2 - [NGAL_HUMAN]	0	0	0	2	0	0	1	3	2	2	2	0	1	1	2	12	1	1	2		P80188	1		P80188	1
P50395	GDIB_HUMAN	Rab GDP dissociation inhibitor beta OS=Homo sapiens GN=GDI2 PE=1 SV=2 - [GDIB_HUMAN]	2	7	1	0	2	6	3	1	0	0	0	4	0	1	18	9	1	1	2		P50395	1		P50395	1
Q16270	IBP7_HUMAN	Insulin-like growth factor-binding protein 7 OS=Homo sapiens GN=IGFBP7 PE=1 SV=1 - [IBP7_HUMAN]	4	27	7	35	2	0	22	27	16	32	2	5	5	8	75	117	1	1	2		Q16270	1		Q16270	1
P15151	PVR_HUMAN	Poliovirus receptor OS=Homo sapiens GN=PVR PE=1 SV=2 - [PVR_HUMAN]	0	0	2	0	0	0	1	1	0	0	0	0	2	1	2	5	1	1	2		P15151	1		P15151	1
Q9UQN3	CHM2B_HUMAN	Charged multivesicular body protein 2b OS=Homo sapiens GN=CHMP2B PE=1 SV=1 - [CHM2B_HUMAN]	2	2	4	2	2	1	7	1	4	3	0	1	2	3	13	21	1	1	2		Q9UQN3	1		Q9UQN3	1
Q9UGT4	SUSD2_HUMAN	Sushi domain-containing protein 2 OS=Homo sapiens GN=SUSD2 PE=1 SV=1 - [SUSD2_HUMAN]	1	9	3	2	0	2	1	1	0	1	0	5	0	1	17	9	1	1	2		Q9UGT4	1		Q9UGT4	1
Q99536	VAT1_HUMAN	Synaptic vesicle membrane protein VAT-1 homolog OS=Homo sapiens GN=VAT1 PE=1 SV=2 - [VAT1_HUMAN]	0	0	2	0	0	2	1	1	0	2	0	4	0	0	4	8	1	1	2		Q99536	1		Q99536	1
O15162	PLS1_HUMAN	Phospholipid scramblase 1 OS=Homo sapiens GN=PLSCR1 PE=1 SV=1 - [PLS1_HUMAN]	4	3	2	2	2	2	4	4	1	1	0	2	2	1	15	15	1	1	2		O15162	1		O15162	1
P63092	GNAS2_HUMAN	Guanine nucleotide-binding protein G(s) subunit alpha isoforms short OS=Homo sapiens GN=GNAS PE=1 SV=1 - [GNAS2_HUMAN]	0	0	0	0	5	0	2	2	0	2	0	5	2	0	5	13	1	1	2		P63092	1		P63092	1
P21399	ACOC_HUMAN	Cytoplasmic aconitate hydratase OS=Homo sapiens GN=ACO1 PE=1 SV=3 - [ACOC_HUMAN]	0	7	0	0	1	0	1	0	0	1	0	3	1	2	8	8	1	1	2		P21399	1		P21399	1
P61970	NTF2_HUMAN	Nuclear transport factor 2 OS=Homo sapiens GN=NUTF2 PE=1 SV=1 - [NTF2_HUMAN]	0	9	0	1	0	1	0	2	0	0	0	0	0	0	11	2	1	1	2		P61970	1		P61970	1
Q9NS93	TM7S3_HUMAN	Transmembrane 7 superfamily member 3 OS=Homo sapiens GN=TM7SF3 PE=2 SV=1 - [TM7S3_HUMAN]	2	0	0	5	3	0	1	0	0	4	0	7	3	3	10	18	1	1	2		Q9NS93	1		Q9NS93	1
O75882	ATRN_HUMAN	Attractin OS=Homo sapiens GN=ATRN PE=1 SV=2 - [ATRN_HUMAN]	0	2	3	4	6	0	1	2	0	1	0	0	5	2	15	11	1	1	2		O75882	1		O75882	1
Q9UQB8	BAIP2_HUMAN	Brain-specific angiogenesis inhibitor 1-associated protein 2 OS=Homo sapiens GN=BAIAP2 PE=1 SV=1 - [BAIP2_HUMAN]	2	0	0	0	0	0	3	3	2	3	0	5	1	0	2	17	1	1	2		Q9UQB8	1		Q9UQB8	1
P53990	IST1_HUMAN	IST1 homolog OS=Homo sapiens GN=IST1 PE=1 SV=1 - [IST1_HUMAN]	10	5	2	0	4	7	3	5	3	4	2	11	2	0	28	30	1	1	2		P53990	1		P53990	1
P04899	GNAI2_HUMAN	Guanine nucleotide-binding protein G(i) subunit alpha-2 OS=Homo sapiens GN=GNAI2 PE=1 SV=3 - [GNAI2_HUMAN]	0	0	4	8	6	5	10	6	0	7	0	9	7	2	23	41	1	1	2		P04899	1		P04899	1
P15328	FOLR1_HUMAN	Folate receptor alpha OS=Homo sapiens GN=FOLR1 PE=1 SV=3 - [FOLR1_HUMAN]	0	5	3	2	0	0	5	4	0	3	1	0	1	4	10	18	1	1	2		P15328	1		P15328	1
Q9H223	EHD4_HUMAN	EH domain-containing protein 4 OS=Homo sapiens GN=EHD4 PE=1 SV=1 - [EHD4_HUMAN]	3	0	1	0	0	3	4	1	0	1	0	4	1	0	7	11	1	1	2		Q9H223	1		Q9H223	1
P27105	STOM_HUMAN	Erythrocyte band 7 integral membrane protein OS=Homo sapiens GN=STOM PE=1 SV=3 - [STOM_HUMAN]	5	1	0	1	0	5	1	1	0	6	5	8	2	1	12	24	1	1	2		P27105	1		P27105	1
Q9UBI6	GBG12_HUMAN	Guanine nucleotide-binding protein G(I)/G(S)/G(O) subunit gamma-12 OS=Homo sapiens GN=GNG12 PE=1 SV=3 - [GBG12_HUMAN]	2	0	1	0	2	1	2	2	0	2	0	3	1	0	6	10	1	1	2		Q9UBI6	1		Q9UBI6	1
P07998	RNAS1_HUMAN	Ribonuclease pancreatic OS=Homo sapiens GN=RNASE1 PE=1 SV=4 - [RNAS1_HUMAN]	0	0	0	24	2	0	18	10	0	24	15	0	21	0	26	88	1	1	2		P07998	1		P07998	1
Q9UK41	VPS28_HUMAN	Vacuolar protein sorting-associated protein 28 homolog OS=Homo sapiens GN=VPS28 PE=1 SV=1 - [VPS28_HUMAN]	4	1	4	2	6	4	4	3	0	3	0	4	0	0	21	14	1	1	2		Q9UK41	1		Q9UK41	1
P06733	ENOA_HUMAN	Alpha-enolase OS=Homo sapiens GN=ENO1 PE=1 SV=2 - [ENOA_HUMAN]	4	20	0	2	1	8	3	1	0	1	0	9	3	8	35	25	1	1	2		P06733	1		P06733	1
P08107	HSP71_HUMAN	Heat shock 70 kDa protein 1A/1B OS=Homo sapiens GN=HSPA1A PE=1 SV=5 - [HSP71_HUMAN]	3	5	2	3	0	7	3	0	2	3	0	9	3	0	20	20	1	1	2		P08107	1		P08107	1
P27348	1433T_HUMAN	14-3-3 protein theta OS=Homo sapiens GN=YWHAQ PE=1 SV=1 - [1433T_HUMAN]	3	4	2	0	0	6	7	1	0	3	0	2	3	3	15	19	1	1	2		P27348	1		P27348	1
P08758	ANXA5_HUMAN	Annexin A5 OS=Homo sapiens GN=ANXA5 PE=1 SV=2 - [ANXA5_HUMAN]	3	3	0	0	1	4	5	2	6	1	3	10	0	0	11	27	1	1	2		P08758	1		P08758	1
P20073	ANXA7_HUMAN	Annexin A7 OS=Homo sapiens GN=ANXA7 PE=1 SV=3 - [ANXA7_HUMAN]	1	0	1	0	1	4	1	0	0	1	0	9	1	0	7	12	1	1	2		P20073	1		P20073	1
P08195	4F2_HUMAN	4F2 cell-surface antigen heavy chain OS=Homo sapiens GN=SLC3A2 PE=1 SV=3 - [4F2_HUMAN]	0	6	0	3	0	0	7	6	4	6	0	7	2	1	9	33	1	1	2		P08195	1		P08195	1
Q8TE68	ES8L1_HUMAN	Epidermal growth factor receptor kinase substrate 8-like protein 1 OS=Homo sapiens GN=EPS8L1 PE=1 SV=3 - [ES8L1_HUMAN]	0	0	0	1	2	0	2	0	0	1	0	1	0	0	3	4	1	1	2		Q8TE68	1		Q8TE68	1
Q9Y6W3	CAN7_HUMAN	Calpain-7 OS=Homo sapiens GN=CAPN7 PE=1 SV=1 - [CAN7_HUMAN]	4	3	1	2	1	5	1	1	0	1	0	2	1	1	16	7	1	1	2		Q9Y6W3	1		Q9Y6W3	1
P0CG04	LAC1_HUMAN	Ig lambda-1 chain C regions OS=Homo sapiens GN=IGLC1 PE=1 SV=1 - [LAC1_HUMAN]	0	2	0	0	0	0	0	0	0	0	7	14	0	0	2	21	1	1	2		P0CG04	1		P0CG04	1
P12821	ACE_HUMAN	Angiotensin-converting enzyme OS=Homo sapiens GN=ACE PE=1 SV=1 - [ACE_HUMAN]	0	5	0	0	3	2	1	2	0	0	0	12	0	1	10	16	1	1	2		P12821	1		P12821	1
O94804	STK10_HUMAN	Serine/threonine-protein kinase 10 OS=Homo sapiens GN=STK10 PE=1 SV=1 - [STK10_HUMAN]	0	0	2	1	0	0	1	4	0	0	0	0	4	0	3	9	1	1	2		O94804	1		O94804	1
O75351	VPS4B_HUMAN	Vacuolar protein sorting-associated protein 4B OS=Homo sapiens GN=VPS4B PE=1 SV=2 - [VPS4B_HUMAN]	2	0	0	2	0	2	2	2	0	1	0	1	0	0	6	6	1	1	2		O75351	1		O75351	1
P35241	RADI_HUMAN	Radixin OS=Homo sapiens GN=RDX PE=1 SV=1 - [RADI_HUMAN]	4	3	3	0	0	0	0	3	0	0	0	8	2	0	10	13	1	1	2		P35241	1		P35241	1
P16444	DPEP1_HUMAN	Dipeptidase 1 OS=Homo sapiens GN=DPEP1 PE=1 SV=3 - [DPEP1_HUMAN]	1	14	0	1	0	2	7	2	4	1	0	14	2	0	18	30	1	1	2		P16444	1		P16444	1
P09543	CN37_HUMAN	2',3'-cyclic-nucleotide 3'-phosphodiesterase OS=Homo sapiens GN=CNP PE=1 SV=2 - [CN37_HUMAN]	0	3	1	1	2	3	3	1	1	3	0	3	1	0	10	12	1	1	2		P09543	1		P09543	1
P01766	HV305_HUMAN	Ig heavy chain V-III region BRO OS=Homo sapiens PE=1 SV=1 - [HV305_HUMAN]	0	4	0	0	4	0	3	3	3	3	3	7	0	4	8	26	1	1	2		P01766	1		P01766	1
P60033	CD81_HUMAN	CD81 antigen OS=Homo sapiens GN=CD81 PE=1 SV=1 - [CD81_HUMAN]	1	1	0	0	2	3	2	2	1	2	0	2	2	0	7	11	1	1	2		P60033	1		P60033	1
P60174	TPIS_HUMAN	Triosephosphate isomerase OS=Homo sapiens GN=TPI1 PE=1 SV=3 - [TPIS_HUMAN]	2	4	0	0	1	3	2	3	1	4	0	4	1	1	10	16	1	1	2		P60174	1		P60174	1
P07437	TBB5_HUMAN	Tubulin beta chain OS=Homo sapiens GN=TUBB PE=1 SV=2 - [TBB5_HUMAN]	0	0	5	2	1	0	4	2	0	2	0	1	4	5	8	18	1	1	2		P07437	1		P07437	1
P61204	ARF3_HUMAN	ADP-ribosylation factor 3 OS=Homo sapiens GN=ARF3 PE=1 SV=2 - [ARF3_HUMAN]	2	0	0	0	0	5	0	0	0	0	0	5	0	0	7	5	1	1	2		P61204	1		P61204	1
Q6UXG3	CLM9_HUMAN	CMRF35-like molecule 9 OS=Homo sapiens GN=CD300LG PE=1 SV=2 - [CLM9_HUMAN]	2	2	4	2	4	0	1	3	4	0	1	0	5	4	14	18	1	1	2		Q6UXG3	1		Q6UXG3	1
Q13621	S12A1_HUMAN	Solute carrier family 12 member 1 OS=Homo sapiens GN=SLC12A1 PE=1 SV=2 - [S12A1_HUMAN]	6	0	1	0	5	1	2	2	0	3	0	11	1	0	13	19	1	1	2		Q13621	1		Q13621	1
Q495M3	S36A2_HUMAN	Proton-coupled amino acid transporter 2 OS=Homo sapiens GN=SLC36A2 PE=1 SV=1 - [S36A2_HUMAN]	3	1	0	1	0	3	4	3	0	2	0	2	1	0	8	12	1	1	2		Q495M3	1		Q495M3	1
P13489	RINI_HUMAN	Ribonuclease inhibitor OS=Homo sapiens GN=RNH1 PE=1 SV=2 - [RINI_HUMAN]	0	2	0	1	0	0	2	0	1	1	0	0	2	1	3	7	1	1	2		P13489	1		P13489	1
P63096	GNAI1_HUMAN	Guanine nucleotide-binding protein G(i) subunit alpha-1 OS=Homo sapiens GN=GNAI1 PE=1 SV=2 - [GNAI1_HUMAN]	4	1	2	2	3	0	5	0	0	0	0	5	0	0	12	10	1	1	2		P63096	1		P63096	1
O43175	SERA_HUMAN	D-3-phosphoglycerate dehydrogenase OS=Homo sapiens GN=PHGDH PE=1 SV=4 - [SERA_HUMAN]	0	2	2	1	0	1	1	1	0	1	0	0	0	2	6	5	1	1	2		O43175	1		O43175	1
Q99816	TS101_HUMAN	Tumor susceptibility gene 101 protein OS=Homo sapiens GN=TSG101 PE=1 SV=2 - [TS101_HUMAN]	6	0	2	0	0	4	1	1	0	0	0	5	1	0	12	8	1	1	2		Q99816	1		Q99816	1
P15104	GLNA_HUMAN	Glutamine synthetase OS=Homo sapiens GN=GLUL PE=1 SV=4 - [GLNA_HUMAN]	0	2	0	0	0	0	0	4	0	0	0	0	0	3	2	7	1	1	2		P15104	1		P15104	1
P31639	SC5A2_HUMAN	Sodium/glucose cotransporter 2 OS=Homo sapiens GN=SLC5A2 PE=1 SV=1 - [SC5A2_HUMAN]	0	2	1	1	1	1	3	3	1	2	0	3	2	1	6	15	1	1	2		P31639	1		P31639	1
P62873	GBB1_HUMAN	Guanine nucleotide-binding protein G(I)/G(S)/G(T) subunit beta-1 OS=Homo sapiens GN=GNB1 PE=1 SV=3 - [GBB1_HUMAN]	3	5	1	1	3	8	4	3	0	2	0	9	4	0	21	22	1	1	2		P62873	1		P62873	1
P07737	PROF1_HUMAN	Profilin-1 OS=Homo sapiens GN=PFN1 PE=1 SV=2 - [PROF1_HUMAN]	1	0	0	0	0	3	0	1	0	1	0	4	1	0	4	7	1	1	2		P07737	1		P07737	1
P62879	GBB2_HUMAN	Guanine nucleotide-binding protein G(I)/G(S)/G(T) subunit beta-2 OS=Homo sapiens GN=GNB2 PE=1 SV=3 - [GBB2_HUMAN]	3	3	0	2	2	6	3	0	0	0	0	10	0	0	16	13	1	1	2		P62879	1		P62879	1
Q3SXY8	AR13B_HUMAN	ADP-ribosylation factor-like protein 13B OS=Homo sapiens GN=ARL13B PE=1 SV=1 - [AR13B_HUMAN]	0	0	0	0	3	0	1	2	0	0	0	0	0	0	3	3	1	1	2		Q3SXY8	1		Q3SXY8	1
P55017	S12A3_HUMAN	Solute carrier family 12 member 3 OS=Homo sapiens GN=SLC12A3 PE=1 SV=3 - [S12A3_HUMAN]	4	0	4	3	1	0	4	1	0	2	0	9	1	0	12	17	1	1	2		P55017	1		P55017	1
P16152	CBR1_HUMAN	Carbonyl reductase [NADPH] 1 OS=Homo sapiens GN=CBR1 PE=1 SV=3 - [CBR1_HUMAN]	0	7	0	0	0	0	2	0	0	3	0	6	1	1	7	13	1	1	2		P16152	1		P16152	1
P08582	TRFM_HUMAN	Melanotransferrin OS=Homo sapiens GN=MFI2 PE=1 SV=2 - [TRFM_HUMAN]	1	2	1	2	0	2	1	2	0	0	0	0	0	0	8	3	1	1	2		P08582	1		P08582	1
Q8IX04	UEVLD_HUMAN	Ubiquitin-conjugating enzyme E2 variant 3 OS=Homo sapiens GN=UEVLD PE=1 SV=2 - [UEVLD_HUMAN]	2	0	0	1	0	1	0	0	0	0	0	3	0	0	4	3	1	1	2		Q8IX04	1		Q8IX04	1
P13639	EF2_HUMAN	Elongation factor 2 OS=Homo sapiens GN=EEF2 PE=1 SV=4 - [EF2_HUMAN]	0	1	4	0	0	0	0	0	3	0	0	1	1	1	5	6	1	1	2		P13639	1		P13639	1
P29401	TKT_HUMAN	Transketolase OS=Homo sapiens GN=TKT PE=1 SV=3 - [TKT_HUMAN]	0	4	0	0	0	0	0	1	1	0	0	0	0	4	4	6	1	1	2		P29401	1		P29401	1
P51149	RAB7A_HUMAN	Ras-related protein Rab-7a OS=Homo sapiens GN=RAB7A PE=1 SV=1 - [RAB7A_HUMAN]	3	1	2	1	4	8	1	1	0	0	0	7	0	1	19	10	1	1	2		P51149	1		P51149	1
O00592	PODXL_HUMAN	Podocalyxin OS=Homo sapiens GN=PODXL PE=1 SV=2 - [PODXL_HUMAN]	6	1	1	1	1	0	8	3	2	6	6	4	2	0	10	31	1	1	2		O00592	1		O00592	1
P13987	CD59_HUMAN	CD59 glycoprotein OS=Homo sapiens GN=CD59 PE=1 SV=1 - [CD59_HUMAN]	6	2	0	3	4	9	2	2	0	2	13	4	4	0	24	27	1	1	2		P13987	1		P13987	1
Q3LXA3	TKFC_HUMAN	Bifunctional ATP-dependent dihydroxyacetone kinase/FAD-AMP lyase (cyclizing) OS=Homo sapiens GN=DAK PE=1 SV=2 - [DHAK_HUMAN]	0	4	0	2	0	0	1	3	0	3	1	6	0	4	6	18	1	1	2		Q3LXA3	1		Q3LXA3	1
Q14108	SCRB2_HUMAN	Lysosome membrane protein 2 OS=Homo sapiens GN=SCARB2 PE=1 SV=2 - [SCRB2_HUMAN]	4	1	0	0	0	2	0	0	0	1	0	2	2	1	7	6	1	1	2		Q14108	1		Q14108	1
Q6W4X9	MUC6_HUMAN	Mucin-6 OS=Homo sapiens GN=MUC6 PE=1 SV=3 - [MUC6_HUMAN]	0	0	2	0	0	0	0	0	0	0	0	0	3	0	2	3	1	1	2		Q6W4X9	1		Q6W4X9	1
Q7Z5L0	VMO1_HUMAN	Vitelline membrane outer layer protein 1 homolog OS=Homo sapiens GN=VMO1 PE=1 SV=1 - [VMO1_HUMAN]	0	0	2	9	1	0	6	5	2	4	0	0	1	2	12	20	1	1	2		Q7Z5L0	1		Q7Z5L0	1
P01619	KV301_HUMAN	Ig kappa chain V-III region B6 OS=Homo sapiens PE=1 SV=1 - [KV301_HUMAN]	4	2	6	2	3	3	0	3	0	0	0	6	3	0	20	12	1	1	2		P01619	1		P01619	1
Q14117	DPYS_HUMAN	Dihydropyrimidinase OS=Homo sapiens GN=DPYS PE=1 SV=1 - [DPYS_HUMAN]	0	4	0	0	0	0	2	4	2	4	0	1	4	2	4	19	1	1	2		Q14117	1		Q14117	1
Q16651	PRSS8_HUMAN	Prostasin OS=Homo sapiens GN=PRSS8 PE=1 SV=1 - [PRSS8_HUMAN]	0	1	0	2	1	0	1	2	0	1	0	0	1	0	4	5	1	1	2		Q16651	1		Q16651	1
P31939	PUR9_HUMAN	Bifunctional purine biosynthesis protein PURH OS=Homo sapiens GN=ATIC PE=1 SV=3 - [PUR9_HUMAN]	0	0	3	0	0	0	1	1	0	0	0	0	0	4	3	6	1	1	2		P31939	1		P31939	1
P09972	ALDOC_HUMAN	Fructose-bisphosphate aldolase C OS=Homo sapiens GN=ALDOC PE=1 SV=2 - [ALDOC_HUMAN]	0	3	0	0	0	1	0	5	1	0	0	0	0	2	4	8	1	1	2		P09972	1		P09972	1
Q92597	NDRG1_HUMAN	Protein NDRG1 OS=Homo sapiens GN=NDRG1 PE=1 SV=1 - [NDRG1_HUMAN]	0	0	2	0	0	0	5	1	1	2	0	0	2	1	2	12	1	1	2		Q92597	1		Q92597	1
Q53GD3	CTL4_HUMAN	Choline transporter-like protein 4 OS=Homo sapiens GN=SLC44A4 PE=2 SV=2 - [CTL4_HUMAN]	2	1	0	0	0	3	0	0	0	0	0	3	0	0	6	3	1	1	2		Q53GD3	1		Q53GD3	1
P35579	MYH9_HUMAN	Myosin-9 OS=Homo sapiens GN=MYH9 PE=1 SV=4 - [MYH9_HUMAN]	0	1	2	0	0	3	3	2	0	4	0	6	1	38	6	54	1	1	2		P35579	1		P35579	1
P30041	PRDX6_HUMAN	Peroxiredoxin-6 OS=Homo sapiens GN=PRDX6 PE=1 SV=3 - [PRDX6_HUMAN]	1	3	1	1	0	5	1	1	1	0	0	3	0	1	11	7	1	1	2		P30041	1		P30041	1
P15313	VATB1_HUMAN	V-type proton ATPase subunit B, kidney isoform OS=Homo sapiens GN=ATP6V1B1 PE=1 SV=3 - [VATB1_HUMAN]	0	0	0	0	0	2	0	0	0	1	0	4	0	0	2	5	1	1	2		P15313	1		P15313	1
P14550	AK1A1_HUMAN	Alcohol dehydrogenase [NADP(+)] OS=Homo sapiens GN=AKR1A1 PE=1 SV=3 - [AK1A1_HUMAN]	0	8	0	0	0	7	0	0	0	0	0	9	0	0	15	9	1	1	2		P14550	1		P14550	1
P19801	AOC1_HUMAN	Amiloride-sensitive amine oxidase [copper-containing] OS=Homo sapiens GN=AOC1 PE=1 SV=4 - [AOC1_HUMAN]	1	8	1	2	0	0	2	3	0	1	0	3	0	1	12	10	1	1	2		P19801	1		P19801	1
Q9Y287	ITM2B_HUMAN	Integral membrane protein 2B OS=Homo sapiens GN=ITM2B PE=1 SV=1 - [ITM2B_HUMAN]	0	1	0	2	0	2	2	4	2	4	0	2	3	0	5	17	1	1	2		Q9Y287	1		Q9Y287	1
P02649	APOE_HUMAN	Apolipoprotein E OS=Homo sapiens GN=APOE PE=1 SV=1 - [APOE_HUMAN]	6	7	5	1	0	0	1	1	2	2	2	6	1	1	19	16	1	1	2		P02649	1		P02649	1
P05186	PPBT_HUMAN	Alkaline phosphatase, tissue-nonspecific isozyme OS=Homo sapiens GN=ALPL PE=1 SV=4 - [PPBT_HUMAN]	0	0	0	2	0	0	3	2	0	3	1	2	1	2	2	14	1	1	2		P05186	1		P05186	1
P12277	KCRB_HUMAN	Creatine kinase B-type OS=Homo sapiens GN=CKB PE=1 SV=1 - [KCRB_HUMAN]	0	4	1	2	0	18	0	0	0	0	0	8	0	0	25	8	1	1	2		P12277	1		P12277	1
P30085	KCY_HUMAN	UMP-CMP kinase OS=Homo sapiens GN=CMPK1 PE=1 SV=3 - [KCY_HUMAN]	0	2	0	0	0	0	2	0	2	1	0	1	0	0	2	6	1	1	2		P30085	1		P30085	1
P33908	MA1A1_HUMAN	Mannosyl-oligosaccharide 1,2-alpha-mannosidase IA OS=Homo sapiens GN=MAN1A1 PE=1 SV=3 - [MA1A1_HUMAN]	1	24	3	2	1	0	1	2	0	2	1	4	1	3	31	14	1	1	2		P33908	1		P33908	1
P62834	RAP1A_HUMAN	Ras-related protein Rap-1A OS=Homo sapiens GN=RAP1A PE=1 SV=1 - [RAP1A_HUMAN]	0	0	0	0	0	2	0	0	0	0	0	4	0	0	2	4	1	1	2		P62834	1		P62834	1
Q6P531	GGT6_HUMAN	Gamma-glutamyltransferase 6 OS=Homo sapiens GN=GGT6 PE=2 SV=2 - [GGT6_HUMAN]	0	3	3	2	2	0	1	2	2	2	0	0	2	0	10	9	1	1	2		Q6P531	1		Q6P531	1
P08294	SODE_HUMAN	Extracellular superoxide dismutase [Cu-Zn] OS=Homo sapiens GN=SOD3 PE=1 SV=2 - [SODE_HUMAN]	0	3	1	2	1	0	4	3	0	3	3	1	2	2	7	18	1	1	2		P08294	1		P08294	1
P01617	KV204_HUMAN	Ig kappa chain V-II region TEW OS=Homo sapiens PE=1 SV=1 - [KV204_HUMAN]	0	0	1	4	0	0	4	2	1	0	2	0	2	2	5	13	1	1	2		P01617	1		P01617	1
O95336	6PGL_HUMAN	6-phosphogluconolactonase OS=Homo sapiens GN=PGLS PE=1 SV=2 - [6PGL_HUMAN]	1	4	0	1	1	1	0	4	2	0	0	1	0	2	8	9	1	1	2		O95336	1		O95336	1
Q9UHL4	DPP2_HUMAN	Dipeptidyl peptidase 2 OS=Homo sapiens GN=DPP7 PE=1 SV=3 - [DPP2_HUMAN]	0	4	1	5	0	0	7	5	1	4	5	1	0	5	10	28	1	1	2		Q9UHL4	1		Q9UHL4	1
Q08211	DHX9_HUMAN	ATP-dependent RNA helicase A OS=Homo sapiens GN=DHX9 PE=1 SV=4 - [DHX9_HUMAN]	0	0	2	0	0	0	0	1	0	0	0	0	0	2	2	3	1	1	2		Q08211	1		Q08211	1
Q9BYF1	ACE2_HUMAN	Angiotensin-converting enzyme 2 OS=Homo sapiens GN=ACE2 PE=1 SV=2 - [ACE2_HUMAN]	0	2	0	0	0	0	2	1	0	0	0	7	0	0	2	10	1	1	2		Q9BYF1	1		Q9BYF1	1
Q9UI12	VATH_HUMAN	V-type proton ATPase subunit H OS=Homo sapiens GN=ATP6V1H PE=1 SV=1 - [VATH_HUMAN]	0	0	0	0	0	2	0	0	0	0	0	3	0	0	2	3	1	1	2		Q9UI12	1		Q9UI12	1
Q8N5I2	ARRD1_HUMAN	Arrestin domain-containing protein 1 OS=Homo sapiens GN=ARRDC1 PE=2 SV=1 - [ARRD1_HUMAN]	0	0	0	0	0	2	0	0	0	0	0	4	1	0	2	5	1	1	2		Q8N5I2	1		Q8N5I2	1
Q96FE7	P3IP1_HUMAN	Phosphoinositide-3-kinase-interacting protein 1 OS=Homo sapiens GN=PIK3IP1 PE=1 SV=2 - [P3IP1_HUMAN]	3	0	0	1	3	0	0	0	2	1	4	0	1	1	7	9	1	1	2		Q96FE7	1		Q96FE7	1
Q8N271	PROM2_HUMAN	Prominin-2 OS=Homo sapiens GN=PROM2 PE=1 SV=1 - [PROM2_HUMAN]	5	2	1	0	1	0	0	0	0	0	0	4	1	0	9	5	1	1	2		Q8N271	1		Q8N271	1
O95865	DDAH2_HUMAN	N(G),N(G)-dimethylarginine dimethylaminohydrolase 2 OS=Homo sapiens GN=DDAH2 PE=1 SV=1 - [DDAH2_HUMAN]	4	3	2	2	0	4	0	2	2	2	0	0	0	2	15	8	1	1	2		O95865	1		O95865	1
Q9H4M9	EHD1_HUMAN	EH domain-containing protein 1 OS=Homo sapiens GN=EHD1 PE=1 SV=2 - [EHD1_HUMAN]	2	1	0	1	0	5	3	0	0	2	0	4	0	0	9	9	1	1	2		Q9H4M9	1		Q9H4M9	1
P22314	UBA1_HUMAN	Ubiquitin-like modifier-activating enzyme 1 OS=Homo sapiens GN=UBA1 PE=1 SV=3 - [UBA1_HUMAN]	0	6	7	1	0	0	1	3	1	0	0	1	0	0	14	6	1	1	2		P22314	1		P22314	1
P34896	GLYC_HUMAN	Serine hydroxymethyltransferase, cytosolic OS=Homo sapiens GN=SHMT1 PE=1 SV=1 - [GLYC_HUMAN]	0	6	0	1	0	0	3	2	0	1	0	3	0	1	7	10	1	1	2		P34896	1		P34896	1
P07858	CATB_HUMAN	Cathepsin B OS=Homo sapiens GN=CTSB PE=1 SV=3 - [CATB_HUMAN]	0	0	0	0	2	0	2	1	0	2	3	5	1	2	2	16	1	1	2		P07858	1		P07858	1
P00734	THRB_HUMAN	Prothrombin OS=Homo sapiens GN=F2 PE=1 SV=2 - [THRB_HUMAN]	2	9	6	5	2	0	7	2	1	0	7	3	3	3	24	26	1	1	2		P00734	1		P00734	1
O75264	SIM24_HUMAN	Small integral membrane protein 24 OS=Homo sapiens GN=SMIM24 PE=2 SV=2 - [SIM24_HUMAN]	0	0	0	0	0	2	0	5	0	2	0	2	0	0	2	9	1	1	2		O75264	1		O75264	1
P22891	PROZ_HUMAN	Vitamin K-dependent protein Z OS=Homo sapiens GN=PROZ PE=1 SV=2 - [PROZ_HUMAN]	1	6	0	5	0	0	2	2	0	4	0	0	1	2	12	11	1	1	2		P22891	1		P22891	1
P04155	TFF1_HUMAN	Trefoil factor 1 OS=Homo sapiens GN=TFF1 PE=1 SV=1 - [TFF1_HUMAN]	0	0	1	0	2	0	1	1	1	1	1	0	4	2	3	11	1	1	2		P04155	1		P04155	1
P04746	AMYP_HUMAN	Pancreatic alpha-amylase OS=Homo sapiens GN=AMY2A PE=1 SV=2 - [AMYP_HUMAN]	0	8	0	8	0	0	0	19	0	0	0	0	0	0	16	19	1	1	2		P04746	1		P04746	1
P13645	K1C10_HUMAN	Keratin, type I cytoskeletal 10 OS=Homo sapiens GN=KRT10 PE=1 SV=6 - [K1C10_HUMAN]	17	6	2	0	6	6	0	1	2	1	27	3	1	5	37	40	1	1	2		P13645	1		P13645	1
Q96PD5	PGRP2_HUMAN	N-acetylmuramoyl-L-alanine amidase OS=Homo sapiens GN=PGLYRP2 PE=1 SV=1 - [PGRP2_HUMAN]	0	6	0	6	1	0	7	3	0	3	0	0	0	0	13	13	1	1	2		Q96PD5	1		Q96PD5	1
P08571	CD14_HUMAN	Monocyte differentiation antigen CD14 OS=Homo sapiens GN=CD14 PE=1 SV=2 - [CD14_HUMAN]	1	9	2	2	2	0	1	2	2	0	0	0	1	0	16	6	1	1	2		P08571	1		P08571	1
Q03591	FHR1_HUMAN	Complement factor H-related protein 1 OS=Homo sapiens GN=CFHR1 PE=1 SV=2 - [FHR1_HUMAN]	0	0	0	3	0	0	3	2	0	2	0	0	0	0	3	7	1	1	2		Q03591	1		Q03591	1
P41222	PTGDS_HUMAN	Prostaglandin-H2 D-isomerase OS=Homo sapiens GN=PTGDS PE=1 SV=1 - [PTGDS_HUMAN]	3	2	3	2	4	6	2	2	3	2	4	1	2	3	20	19	1	1	2		P41222	1		P41222	1
P07996	TSP1_HUMAN	Thrombospondin-1 OS=Homo sapiens GN=THBS1 PE=1 SV=2 - [TSP1_HUMAN]	0	18	0	3	4	0	1	1	0	4	3	1	1	4	25	15	1	1	2		P07996	1		P07996	1
P35908	K22E_HUMAN	Keratin, type II cytoskeletal 2 epidermal OS=Homo sapiens GN=KRT2 PE=1 SV=2 - [K22E_HUMAN]	16	0	4	1	3	0	1	2	0	4	15	0	4	4	24	30	1	1	2		P35908	1		P35908	1
P01893	HLAH_HUMAN	Putative HLA class I histocompatibility antigen, alpha chain H OS=Homo sapiens GN=HLA-H PE=5 SV=3 - [HLAH_HUMAN]	0	0	2	0	2	0	0	1	1	0	2	0	0	0	4	4	1	1	2		P01893	1		P01893	1
Q9NP85	PODO_HUMAN	Podocin OS=Homo sapiens GN=NPHS2 PE=1 SV=1 - [PODO_HUMAN]	0	0	0	1	2	0	2	0	1	2	0	1	1	1	3	8	1	1	2		Q9NP85	1		Q9NP85	1
P51688	SPHM_HUMAN	N-sulphoglucosamine sulphohydrolase OS=Homo sapiens GN=SGSH PE=1 SV=1 - [SPHM_HUMAN]	0	2	0	1	0	0	1	2	0	0	0	0	0	0	3	3	1	1	2		P51688	1		P51688	1
P05156	CFAI_HUMAN	Complement factor I OS=Homo sapiens GN=CFI PE=1 SV=2 - [CFAI_HUMAN]	0	12	9	10	0	0	4	5	0	8	0	0	1	4	31	22	1	1	2		P05156	1		P05156	1
P08603	CFAH_HUMAN	Complement factor H OS=Homo sapiens GN=CFH PE=1 SV=4 - [CFAH_HUMAN]	0	7	0	1	0	0	1	11	0	5	0	0	0	0	8	17	1	1	2		P08603	1		P08603	1
P0CF74	LAC6_HUMAN	Ig lambda-6 chain C region OS=Homo sapiens GN=IGLC6 PE=4 SV=1 - [LAC6_HUMAN]	4	0	0	0	4	0	7	5	0	2	7	15	3	0	8	39	1	1	2		P0CF74	1		P0CF74	1
Q8WZ75	ROBO4_HUMAN	Roundabout homolog 4 OS=Homo sapiens GN=ROBO4 PE=1 SV=1 - [ROBO4_HUMAN]	0	0	4	5	2	0	5	9	2	7	0	0	3	3	11	29	1	1	2		Q8WZ75	1		Q8WZ75	1
Q9NR99	MXRA5_HUMAN	Matrix-remodeling-associated protein 5 OS=Homo sapiens GN=MXRA5 PE=2 SV=3 - [MXRA5_HUMAN]	0	3	0	1	0	0	1	1	0	2	0	0	0	0	4	4	1	1	2		Q9NR99	1		Q9NR99	1
Q9UBG3	CRNN_HUMAN	Cornulin OS=Homo sapiens GN=CRNN PE=1 SV=1 - [CRNN_HUMAN]	0	14	2	3	0	0	2	9	0	2	0	0	0	1	19	14	1	1	2		Q9UBG3	1		Q9UBG3	1
P04004	VTNC_HUMAN	Vitronectin OS=Homo sapiens GN=VTN PE=1 SV=1 - [VTNC_HUMAN]	0	9	0	5	0	2	5	8	3	6	0	7	0	4	16	33	1	1	2		P04004	1		P04004	1
P06870	KLK1_HUMAN	Kallikrein-1 OS=Homo sapiens GN=KLK1 PE=1 SV=2 - [KLK1_HUMAN]	1	11	1	2	2	0	2	2	1	2	0	0	0	0	17	7	1	1	2		P06870	1		P06870	1
O95967	FBLN4_HUMAN	EGF-containing fibulin-like extracellular matrix protein 2 OS=Homo sapiens GN=EFEMP2 PE=1 SV=3 - [FBLN4_HUMAN]	0	3	5	4	0	0	5	4	0	4	0	0	4	0	12	17	1	1	2		O95967	1		O95967	1
Q14314	FGL2_HUMAN	Fibroleukin OS=Homo sapiens GN=FGL2 PE=1 SV=1 - [FGL2_HUMAN]	0	3	0	0	0	0	0	0	0	0	0	2	0	0	3	2	1	1	2		Q14314	1		Q14314	1
P00747	PLMN_HUMAN	Plasminogen OS=Homo sapiens GN=PLG PE=1 SV=2 - [PLMN_HUMAN]	0	5	0	3	0	0	12	9	0	16	1	2	0	0	8	40	1	1	2		P00747	1		P00747	1
P35527	K1C9_HUMAN	Keratin, type I cytoskeletal 9 OS=Homo sapiens GN=KRT9 PE=1 SV=3 - [K1C9_HUMAN]	8	2	3	2	2	2	3	2	2	4	17	1	2	5	19	36	1	1	2		P35527	1		P35527	1
Q9HCU0	CD248_HUMAN	Endosialin OS=Homo sapiens GN=CD248 PE=1 SV=1 - [CD248_HUMAN]	0	0	1	3	1	0	0	1	0	3	0	0	4	0	5	8	1	1	2		Q9HCU0	1		Q9HCU0	1
P19440	GGT1_HUMAN	Gamma-glutamyltranspeptidase 1 OS=Homo sapiens GN=GGT1 PE=1 SV=2 - [GGT1_HUMAN]	8	8	0	0	0	9	7	0	0	0	0	10	0	0	25	17	1	1	2		P19440	1		P19440	1
P54802	ANAG_HUMAN	Alpha-N-acetylglucosaminidase OS=Homo sapiens GN=NAGLU PE=1 SV=2 - [ANAG_HUMAN]	0	24	1	3	2	0	5	2	0	1	0	2	0	2	30	12	1	1	2		P54802	1		P54802	1
P30086	PEBP1_HUMAN	Phosphatidylethanolamine-binding protein 1 OS=Homo sapiens GN=PEBP1 PE=1 SV=3 - [PEBP1_HUMAN]	5	4	0	0	0	4	0	0	0	0	2	4	0	0	13	6	1	1	2		P30086	1		P30086	1
O00299	CLIC1_HUMAN	Chloride intracellular channel protein 1 OS=Homo sapiens GN=CLIC1 PE=1 SV=4 - [CLIC1_HUMAN]	1	2	0	0	0	3	2	0	0	2	0	4	1	0	6	9	1	1	2		O00299	1		O00299	1
P01877	IGHA2_HUMAN	Ig alpha-2 chain C region OS=Homo sapiens GN=IGHA2 PE=1 SV=3 - [IGHA2_HUMAN]	2	13	0	7	0	7	7	0	0	0	7	10	3	0	29	27	1	1	2		P01877	1		P01877	1
Q00796	DHSO_HUMAN	Sorbitol dehydrogenase OS=Homo sapiens GN=SORD PE=1 SV=4 - [DHSO_HUMAN]	0	3	0	0	0	3	0	0	3	0	0	1	0	1	6	5	1	1	2		Q00796	1		Q00796	1
P07602	SAP_HUMAN	Prosaposin OS=Homo sapiens GN=PSAP PE=1 SV=2 - [SAP_HUMAN]	4	7	0	0	0	2	0	0	0	0	1	9	0	0	13	10	1	1	2		P07602	1		P07602	1
P35555	FBN1_HUMAN	Fibrillin-1 OS=Homo sapiens GN=FBN1 PE=1 SV=3 - [FBN1_HUMAN]	0	0	2	2	0	0	0	0	1	0	4	0	10	0	4	15	1	1	2		P35555	1		P35555	1
P00966	ASSY_HUMAN	Argininosuccinate synthase OS=Homo sapiens GN=ASS1 PE=1 SV=2 - [ASSY_HUMAN]	0	8	0	0	0	0	0	0	0	0	0	7	0	0	8	7	1	1	2		P00966	1		P00966	1
O75874	IDHC_HUMAN	Isocitrate dehydrogenase [NADP] cytoplasmic OS=Homo sapiens GN=IDH1 PE=1 SV=2 - [IDHC_HUMAN]	3	3	0	0	0	9	0	0	2	0	0	3	0	0	15	5	1	1	2		O75874	1		O75874	1
P42330	AK1C3_HUMAN	Aldo-keto reductase family 1 member C3 OS=Homo sapiens GN=AKR1C3 PE=1 SV=4 - [AK1C3_HUMAN]	0	2	0	0	0	0	0	2	0	0	0	2	0	0	2	4	1	1	2		P42330	1		P42330	1
P02748	CO9_HUMAN	Complement component C9 OS=Homo sapiens GN=C9 PE=1 SV=2 - [CO9_HUMAN]	0	4	0	2	0	0	0	1	0	0	0	4	0	0	6	5	1	1	2		P02748	1		P02748	1
P08263	GSTA1_HUMAN	Glutathione S-transferase A1 OS=Homo sapiens GN=GSTA1 PE=1 SV=3 - [GSTA1_HUMAN]	0	2	0	0	0	0	0	0	0	0	0	5	0	0	2	5	1	1	2		P08263	1		P08263	1
O00187	MASP2_HUMAN	Mannan-binding lectin serine protease 2 OS=Homo sapiens GN=MASP2 PE=1 SV=4 - [MASP2_HUMAN]	0	1	3	2	4	2	5	2	1	2	1	0	0	0	12	11	1	1	2		O00187	1		O00187	1
P32119	PRDX2_HUMAN	Peroxiredoxin-2 OS=Homo sapiens GN=PRDX2 PE=1 SV=5 - [PRDX2_HUMAN]	2	1	0	0	0	0	0	0	0	0	0	3	0	0	3	3	1	1	2		P32119	1		P32119	1
Q96RF0	SNX18_HUMAN	Sorting nexin-18 OS=Homo sapiens GN=SNX18 PE=1 SV=2 - [SNX18_HUMAN]	0	0	2	1	3	0	0	0	0	0	0	0	1	2	6	3	1	1	2		Q96RF0	1		Q96RF0	1
Q07075	AMPE_HUMAN	Glutamyl aminopeptidase OS=Homo sapiens GN=ENPEP PE=1 SV=3 - [AMPE_HUMAN]	1	2	0	1	0	0	0	0	1	0	4	3	0	0	4	8	1	1	2		Q07075	1		Q07075	1
Q9HC84	MUC5B_HUMAN	Mucin-5B OS=Homo sapiens GN=MUC5B PE=1 SV=3 - [MUC5B_HUMAN]	0	0	2	0	0	0	40	22	0	0	0	15	20	4	2	101	1	1	2		Q9HC84	1		Q9HC84	1
P49221	TGM4_HUMAN	Protein-glutamine gamma-glutamyltransferase 4 OS=Homo sapiens GN=TGM4 PE=1 SV=2 - [TGM4_HUMAN]	0	0	0	0	0	16	3	0	13	0	0	3	0	0	16	19	1	1	2		P49221	1		P49221	1
Q9BRK3	MXRA8_HUMAN	Matrix-remodeling-associated protein 8 OS=Homo sapiens GN=MXRA8 PE=2 SV=1 - [MXRA8_HUMAN]	1	10	0	3	0	2	1	2	0	5	0	0	0	0	16	8	1	1	2		Q9BRK3	1		Q9BRK3	1
P01861	IGHG4_HUMAN	Ig gamma-4 chain C region OS=Homo sapiens GN=IGHG4 PE=1 SV=1 - [IGHG4_HUMAN]	0	5	0	6	4	5	0	0	5	0	5	10	3	0	20	23	1	1	2		P01861	1		P01861	1
Q16610	ECM1_HUMAN	Extracellular matrix protein 1 OS=Homo sapiens GN=ECM1 PE=1 SV=2 - [ECM1_HUMAN]	0	4	0	0	0	0	0	4	0	0	0	0	0	0	4	4	1	1	2		Q16610	1		Q16610	1
Q9BXP8	PAPP2_HUMAN	Pappalysin-2 OS=Homo sapiens GN=PAPPA2 PE=1 SV=4 - [PAPP2_HUMAN]	0	1	3	9	0	0	4	10	0	3	0	0	5	3	13	25	1	1	2		Q9BXP8	1		Q9BXP8	1
P18065	IBP2_HUMAN	Insulin-like growth factor-binding protein 2 OS=Homo sapiens GN=IGFBP2 PE=1 SV=2 - [IBP2_HUMAN]	0	6	5	9	0	0	11	7	0	13	1	0	1	7	20	40	1	1	2		P18065	1		P18065	1
Q8NFZ8	CADM4_HUMAN	Cell adhesion molecule 4 OS=Homo sapiens GN=CADM4 PE=1 SV=1 - [CADM4_HUMAN]	0	0	4	2	1	0	2	3	2	1	1	0	1	0	7	10	1	1	2		Q8NFZ8	1		Q8NFZ8	1
P02751	FINC_HUMAN	Fibronectin OS=Homo sapiens GN=FN1 PE=1 SV=4 - [FINC_HUMAN]	2	13	0	1	1	2	5	6	0	8	2	2	3	1	19	27	1	1	2		P02751	1		P02751	1
P23142	FBLN1_HUMAN	Fibulin-1 OS=Homo sapiens GN=FBLN1 PE=1 SV=4 - [FBLN1_HUMAN]	0	8	0	5	1	0	1	5	1	5	3	0	0	0	14	15	1	1	2		P23142	1		P23142	1
Q9GZM7	TINAL_HUMAN	Tubulointerstitial nephritis antigen-like OS=Homo sapiens GN=TINAGL1 PE=1 SV=1 - [TINAL_HUMAN]	0	0	0	2	0	0	2	3	0	2	3	0	2	0	2	12	1	1	2		Q9GZM7	1		Q9GZM7	1
P01860	IGHG3_HUMAN	Ig gamma-3 chain C region OS=Homo sapiens GN=IGHG3 PE=1 SV=2 - [IGHG3_HUMAN]	0	0	0	5	0	0	5	7	0	6	0	8	2	5	5	33	1	1	2		P01860	1		P01860	1
P25311	ZA2G_HUMAN	Zinc-alpha-2-glycoprotein OS=Homo sapiens GN=AZGP1 PE=1 SV=2 - [ZA2G_HUMAN]	0	0	1	1	1	5	4	1	1	1	6	2	2	1	8	18	1	1	2		P25311	1		P25311	1
Q6UX06	OLFM4_HUMAN	Olfactomedin-4 OS=Homo sapiens GN=OLFM4 PE=1 SV=1 - [OLFM4_HUMAN]	1	5	0	0	0	9	0	0	0	0	0	8	0	0	15	8	1	1	2		Q6UX06	1		Q6UX06	1
Q92896	GSLG1_HUMAN	Golgi apparatus protein 1 OS=Homo sapiens GN=GLG1 PE=1 SV=2 - [GSLG1_HUMAN]	0	4	0	7	0	0	1	0	0	3	0	1	2	0	11	7	1	1	2		Q92896	1		Q92896	1
P02533	K1C14_HUMAN	Keratin, type I cytoskeletal 14 OS=Homo sapiens GN=KRT14 PE=1 SV=4 - [K1C14_HUMAN]	9	0	0	0	0	0	0	0	0	0	9	0	0	2	9	11	1	1	2		P02533	1		P02533	1
Q02818	NUCB1_HUMAN	Nucleobindin-1 OS=Homo sapiens GN=NUCB1 PE=1 SV=4 - [NUCB1_HUMAN]	0	0	2	5	0	0	1	0	0	3	0	0	0	0	7	4	1	1	2		Q02818	1		Q02818	1
P02675	FIBB_HUMAN	Fibrinogen beta chain OS=Homo sapiens GN=FGB PE=1 SV=2 - [FIBB_HUMAN]	0	3	0	0	0	0	1	3	0	0	0	2	0	0	3	6	1	1	2		P02675	1		P02675	1
P01009	A1AT_HUMAN	Alpha-1-antitrypsin OS=Homo sapiens GN=SERPINA1 PE=1 SV=3 - [A1AT_HUMAN]	6	21	2	5	2	5	2	0	0	1	2	37	0	5	41	47	1	1	2		P01009	1		P01009	1
P04217	A1BG_HUMAN	Alpha-1B-glycoprotein OS=Homo sapiens GN=A1BG PE=1 SV=4 - [A1BG_HUMAN]	0	1	1	4	0	0	33	5	9	9	2	1	0	0	6	59	1	1	2		P04217	1		P04217	1
Q9H8L6	MMRN2_HUMAN	Multimerin-2 OS=Homo sapiens GN=MMRN2 PE=1 SV=2 - [MMRN2_HUMAN]	0	2	0	0	0	0	2	1	0	2	0	0	0	1	2	6	1	1	2		Q9H8L6	1		Q9H8L6	1
A6NI73	LIRA5_HUMAN	Leukocyte immunoglobulin-like receptor subfamily A member 5 OS=Homo sapiens GN=LILRA5 PE=1 SV=1 - [LIRA5_HUMAN]	0	0	0	2	0	0	1	2	0	1	0	0	1	0	2	5	1	1	2		A6NI73	1		A6NI73	1
P02790	HEMO_HUMAN	Hemopexin OS=Homo sapiens GN=HPX PE=1 SV=2 - [HEMO_HUMAN]	0	6	1	4	0	0	2	0	0	0	0	10	0	0	11	12	1	1	2		P02790	1		P02790	1
P05543	THBG_HUMAN	Thyroxine-binding globulin OS=Homo sapiens GN=SERPINA7 PE=1 SV=2 - [THBG_HUMAN]	0	2	0	0	0	0	2	0	0	0	1	0	0	0	2	3	1	1	2		P05543	1		P05543	1
P04406	G3P_HUMAN	Glyceraldehyde-3-phosphate dehydrogenase OS=Homo sapiens GN=GAPDH PE=1 SV=3 - [G3P_HUMAN]	1	8	0	1	0	0	0	0	0	0	1	6	0	3	10	10	1	1	2		P04406	1		P04406	1
P10153	RNAS2_HUMAN	Non-secretory ribonuclease OS=Homo sapiens GN=RNASE2 PE=1 SV=2 - [RNAS2_HUMAN]	1	4	0	1	7	1	7	5	3	0	5	1	2	1	14	24	1	1	2		P10153	1		P10153	1
Q9HAT2	SIAE_HUMAN	Sialate O-acetylesterase OS=Homo sapiens GN=SIAE PE=1 SV=1 - [SIAE_HUMAN]	0	1	0	3	0	0	2	1	0	5	2	0	1	0	4	11	1	1	2		Q9HAT2	1		Q9HAT2	1
P16278	BGAL_HUMAN	Beta-galactosidase OS=Homo sapiens GN=GLB1 PE=1 SV=2 - [BGAL_HUMAN]	1	4	0	1	0	1	0	0	0	1	2	12	1	0	7	16	1	1	2		P16278	1		P16278	1
P68104	EF1A1_HUMAN	Elongation factor 1-alpha 1 OS=Homo sapiens GN=EEF1A1 PE=1 SV=1 - [EF1A1_HUMAN]	0	8	1	1	0	4	1	0	0	0	0	3	0	0	14	4	1	1	2		P68104	1		P68104	1
Q9UNN8	EPCR_HUMAN	Endothelial protein C receptor OS=Homo sapiens GN=PROCR PE=1 SV=1 - [EPCR_HUMAN]	2	7	0	6	0	2	0	0	0	0	2	0	0	0	17	2	1	1	2		Q9UNN8	1		Q9UNN8	1
Q07654	TFF3_HUMAN	Trefoil factor 3 OS=Homo sapiens GN=TFF3 PE=1 SV=1 - [TFF3_HUMAN]	0	0	2	0	0	0	1	0	0	0	2	0	1	0	2	4	1	1	2		Q07654	1		Q07654	1
P69905	HBA_HUMAN	Hemoglobin subunit alpha OS=Homo sapiens GN=HBA1 PE=1 SV=2 - [HBA_HUMAN]	0	7	0	1	0	0	0	0	0	0	2	5	0	2	8	9	1	1	2		P69905	1		P69905	1
P13647	K2C5_HUMAN	Keratin, type II cytoskeletal 5 OS=Homo sapiens GN=KRT5 PE=1 SV=3 - [K2C5_HUMAN]	4	0	0	0	0	0	0	0	0	0	7	0	0	1	4	8	1	1	2		P13647	1		P13647	1
P55072	TERA_HUMAN	Transitional endoplasmic reticulum ATPase OS=Homo sapiens GN=VCP PE=1 SV=4 - [TERA_HUMAN]	0	3	0	0	0	3	0	0	0	0	0	1	0	11	6	12	1	1	2		P55072	1		P55072	1
P49327	FAS_HUMAN	Fatty acid synthase OS=Homo sapiens GN=FASN PE=1 SV=3 - [FAS_HUMAN]	0	0	0	0	0	7	0	0	0	0	0	0	1	2	7	3	1	1	2		P49327	1		P49327	1
Q6GTX8	LAIR1_HUMAN	Leukocyte-associated immunoglobulin-like receptor 1 OS=Homo sapiens GN=LAIR1 PE=1 SV=1 - [LAIR1_HUMAN]	2	0	0	0	0	0	2	0	1	0	1	0	2	1	2	7	1	1	2		Q6GTX8	1		Q6GTX8	1
Q8WVN6	SCTM1_HUMAN	Secreted and transmembrane protein 1 OS=Homo sapiens GN=SECTM1 PE=1 SV=2 - [SCTM1_HUMAN]	0	0	0	4	1	0	0	0	0	1	4	0	1	0	5	6	1	1	2		Q8WVN6	1		Q8WVN6	1
Q9UHG2	PCSK1_HUMAN	ProSAAS OS=Homo sapiens GN=PCSK1N PE=1 SV=1 - [PCSK1_HUMAN]	0	0	0	5	0	0	0	0	2	0	2	0	1	0	5	5	1	1	2		Q9UHG2	1		Q9UHG2	1
A6NMY6	AXA2L_HUMAN	Putative annexin A2-like protein OS=Homo sapiens GN=ANXA2P2 PE=5 SV=2 - [AXA2L_HUMAN]	4	0	3	3	0	0	0	0	4	0	0	0	0	0	10	4	1	1	2		A6NMY6	1		A6NMY6	1
P55000	SLUR1_HUMAN	Secreted Ly-6/uPAR-related protein 1 OS=Homo sapiens GN=SLURP1 PE=1 SV=2 - [SLUR1_HUMAN]	0	0	0	1	3	0	4	0	0	2	3	0	1	0	4	10	1	1	2		P55000	1		P55000	1
P02763	A1AG1_HUMAN	Alpha-1-acid glycoprotein 1 OS=Homo sapiens GN=ORM1 PE=1 SV=1 - [A1AG1_HUMAN]	0	0	0	0	0	7	0	0	0	0	7	2	0	0	7	9	1	1	2		P02763	1		P02763	1
P01011	AACT_HUMAN	Alpha-1-antichymotrypsin OS=Homo sapiens GN=SERPINA3 PE=1 SV=2 - [AACT_HUMAN]	1	14	1	1	1	5	1	2	2	0	2	1	1	1	23	10	1	1	2		P01011	1		P01011	1
P22105	TENX_HUMAN	Tenascin-X OS=Homo sapiens GN=TNXB PE=1 SV=3 - [TENX_HUMAN]	0	0	2	0	0	0	3	2	0	1	1	0	3	0	2	10	1	1	2		P22105	1		P22105	1
Q12860	CNTN1_HUMAN	Contactin-1 OS=Homo sapiens GN=CNTN1 PE=1 SV=1 - [CNTN1_HUMAN]	0	2	0	13	0	0	0	1	0	3	0	0	0	0	15	4	1	1	2		Q12860	1		Q12860	1
P31946	1433B_HUMAN	14-3-3 protein beta/alpha OS=Homo sapiens GN=YWHAB PE=1 SV=3 - [1433B_HUMAN]	0	7	0	1	0	6	1	2	0	1	0	2	1	0	14	7	1	1	2		P31946	1		P31946	1
P05452	TETN_HUMAN	Tetranectin OS=Homo sapiens GN=CLEC3B PE=1 SV=3 - [TETN_HUMAN]	0	2	2	3	0	0	1	2	0	0	0	0	0	1	7	4	1	1	2		P05452	1		P05452	1
P07900	HS90A_HUMAN	Heat shock protein HSP 90-alpha OS=Homo sapiens GN=HSP90AA1 PE=1 SV=5 - [HS90A_HUMAN]	3	6	0	0	0	8	0	0	0	0	0	0	0	4	17	4	1	1	2		P07900	1		P07900	1
O95716	RAB3D_HUMAN	Ras-related protein Rab-3D OS=Homo sapiens GN=RAB3D PE=1 SV=1 - [RAB3D_HUMAN]	0	0	0	0	0	7	0	0	2	0	0	2	0	0	7	4	1	1	2		O95716	1		O95716	1
P12830	CADH1_HUMAN	Cadherin-1 OS=Homo sapiens GN=CDH1 PE=1 SV=3 - [CADH1_HUMAN]	0	0	0	0	0	5	1	1	1	0	6	0	0	0	5	9	1	1	2		P12830	1		P12830	1
Q9H299	SH3L3_HUMAN	SH3 domain-binding glutamic acid-rich-like protein 3 OS=Homo sapiens GN=SH3BGRL3 PE=1 SV=1 - [SH3L3_HUMAN]	0	0	0	0	0	4	0	0	0	0	4	0	0	0	4	4	1	1	2		Q9H299	1		Q9H299	1
P08238	HS90B_HUMAN	Heat shock protein HSP 90-beta OS=Homo sapiens GN=HSP90AB1 PE=1 SV=4 - [HS90B_HUMAN]	0	5	0	0	0	5	0	0	0	0	0	3	0	0	10	3	1	1	2		P08238	1		P08238	1
P09211	GSTP1_HUMAN	Glutathione S-transferase P OS=Homo sapiens GN=GSTP1 PE=1 SV=2 - [GSTP1_HUMAN]	1	6	0	0	0	3	0	0	0	0	0	2	0	0	10	2	1	1	2		P09211	1		P09211	1
P68871	HBB_HUMAN	Hemoglobin subunit beta OS=Homo sapiens GN=HBB PE=1 SV=2 - [HBB_HUMAN]	0	8	0	0	1	4	0	0	0	0	1	10	0	1	13	12	1	1	2		P68871	1		P68871	1
P43005	EAA3_HUMAN	Excitatory amino acid transporter 3 OS=Homo sapiens GN=SLC1A1 PE=1 SV=2 - [EAA3_HUMAN]	0	2	0	0	0	4	0	0	0	0	0	4	1	0	6	5	1	1	2		P43005	1		P43005	1
P20337	RAB3B_HUMAN	Ras-related protein Rab-3B OS=Homo sapiens GN=RAB3B PE=1 SV=2 - [RAB3B_HUMAN]	0	0	0	0	0	5	0	0	0	0	0	2	0	0	5	2	1	1	2		P20337	1		P20337	1
P01596	KV104_HUMAN	Ig kappa chain V-I region CAR OS=Homo sapiens PE=1 SV=1 - [KV104_HUMAN]	0	2	0	2	0	2	2	0	0	0	0	3	0	0	6	5	1	1	2		P01596	1		P01596	1
Q06830	PRDX1_HUMAN	Peroxiredoxin-1 OS=Homo sapiens GN=PRDX1 PE=1 SV=1 - [PRDX1_HUMAN]	0	3	0	0	0	3	0	0	0	0	0	2	0	0	6	2	1	1	2		Q06830	1		Q06830	1
Q8NFJ5	RAI3_HUMAN	Retinoic acid-induced protein 3 OS=Homo sapiens GN=GPRC5A PE=1 SV=2 - [RAI3_HUMAN]	2	1	0	0	2	2	0	0	0	0	0	3	0	0	7	3	1	1	2		Q8NFJ5	1		Q8NFJ5	1
P01040	CYTA_HUMAN	Cystatin-A OS=Homo sapiens GN=CSTA PE=1 SV=1 - [CYTA_HUMAN]	0	0	0	0	0	2	0	0	0	0	3	0	0	0	2	3	1	1	2		P01040	1		P01040	1
P08133	ANXA6_HUMAN	Annexin A6 OS=Homo sapiens GN=ANXA6 PE=1 SV=3 - [ANXA6_HUMAN]	0	0	0	0	1	2	2	0	0	2	0	23	1	2	3	30	1	1	2		P08133	1		P08133	1
P31949	S10AB_HUMAN	Protein S100-A11 OS=Homo sapiens GN=S100A11 PE=1 SV=2 - [S10AB_HUMAN]	0	4	0	0	0	2	0	0	0	0	0	2	0	0	6	2	1	1	2		P31949	1		P31949	1
O60635	TSN1_HUMAN	Tetraspanin-1 OS=Homo sapiens GN=TSPAN1 PE=1 SV=2 - [TSN1_HUMAN]	2	1	0	0	0	2	0	0	0	0	0	3	0	0	5	3	1	1	2		O60635	1		O60635	1
P60022	DEFB1_HUMAN	Beta-defensin 1 OS=Homo sapiens GN=DEFB1 PE=1 SV=1 - [DEFB1_HUMAN]	0	2	0	3	1	3	0	0	0	1	3	0	0	2	9	6	1	1	2		P60022	1		P60022	1
P18669	PGAM1_HUMAN	Phosphoglycerate mutase 1 OS=Homo sapiens GN=PGAM1 PE=1 SV=2 - [PGAM1_HUMAN]	0	4	0	0	0	2	0	0	0	0	0	3	0	0	6	3	1	1	2		P18669	1		P18669	1
Q14344	GNA13_HUMAN	Guanine nucleotide-binding protein subunit alpha-13 OS=Homo sapiens GN=GNA13 PE=1 SV=2 - [GNA13_HUMAN]	0	0	0	0	0	2	0	0	0	0	0	3	0	0	2	3	1	1	2		Q14344	1		Q14344	1
P04075	ALDOA_HUMAN	Fructose-bisphosphate aldolase A OS=Homo sapiens GN=ALDOA PE=1 SV=2 - [ALDOA_HUMAN]	0	11	0	1	0	1	0	2	0	0	0	1	0	1	13	4	1	1	2		P04075	1		P04075	1
P06744	G6PI_HUMAN	Glucose-6-phosphate isomerase OS=Homo sapiens GN=GPI PE=1 SV=4 - [G6PI_HUMAN]	1	3	0	0	0	1	0	0	0	0	0	2	0	5	5	7	1	1	2		P06744	1		P06744	1
Q12907	LMAN2_HUMAN	Vesicular integral-membrane protein VIP36 OS=Homo sapiens GN=LMAN2 PE=1 SV=1 - [LMAN2_HUMAN]	1	5	0	4	0	1	2	1	0	0	1	0	0	0	11	4	1	1	2		Q12907	1		Q12907	1
P20930	FILA_HUMAN	Filaggrin OS=Homo sapiens GN=FLG PE=1 SV=3 - [FILA_HUMAN]	0	1	0	3	0	0	0	21	0	0	0	0	0	0	4	21	1	1	2		P20930	1		P20930	1
P48594	SPB4_HUMAN	Serpin B4 OS=Homo sapiens GN=SERPINB4 PE=1 SV=2 - [SPB4_HUMAN]	0	20	0	1	0	0	0	4	0	0	0	0	0	5	21	9	1	1	2		P48594	1		P48594	1
P06702	S10A9_HUMAN	Protein S100-A9 OS=Homo sapiens GN=S100A9 PE=1 SV=1 - [S10A9_HUMAN]	0	23	0	0	0	0	0	3	0	0	1	3	0	6	23	13	1	1	2		P06702	1		P06702	1
P21709	EPHA1_HUMAN	Ephrin type-A receptor 1 OS=Homo sapiens GN=EPHA1 PE=1 SV=4 - [EPHA1_HUMAN]	0	0	0	2	0	0	0	2	0	0	0	0	0	0	2	2	1	1	2		P21709	1		P21709	1
O14773	TPP1_HUMAN	Tripeptidyl-peptidase 1 OS=Homo sapiens GN=TPP1 PE=1 SV=2 - [TPP1_HUMAN]	0	5	0	0	0	0	3	2	0	0	0	4	0	2	5	11	1	1	2		O14773	1		O14773	1
P02671	FIBA_HUMAN	Fibrinogen alpha chain OS=Homo sapiens GN=FGA PE=1 SV=2 - [FIBA_HUMAN]	1	4	0	1	0	0	3	3	0	1	1	0	0	0	6	8	1	1	2		P02671	1		P02671	1
Q93099	HGD_HUMAN	Homogentisate 1,2-dioxygenase OS=Homo sapiens GN=HGD PE=1 SV=2 - [HGD_HUMAN]	0	2	0	0	0	0	0	2	0	2	0	1	0	0	2	5	1	1	2		Q93099	1		Q93099	1
Q9NQ38	ISK5_HUMAN	Serine protease inhibitor Kazal-type 5 OS=Homo sapiens GN=SPINK5 PE=1 SV=2 - [ISK5_HUMAN]	0	0	0	3	0	0	0	2	0	0	2	0	0	0	3	4	1	1	2		Q9NQ38	1		Q9NQ38	1
P22528	SPR1B_HUMAN	Cornifin-B OS=Homo sapiens GN=SPRR1B PE=1 SV=2 - [SPR1B_HUMAN]	0	0	0	3	0	0	0	1	0	0	0	0	0	3	3	4	1	1	2		P22528	1		P22528	1
P25325	THTM_HUMAN	3-mercaptopyruvate sulfurtransferase OS=Homo sapiens GN=MPST PE=1 SV=3 - [THTM_HUMAN]	0	1	0	2	0	0	2	1	0	1	0	0	0	0	3	4	1	1	2		P25325	1		P25325	1
O94910	AGRL1_HUMAN	Latrophilin-1 OS=Homo sapiens GN=LPHN1 PE=1 SV=1 - [LPHN1_HUMAN]	0	0	0	2	0	0	2	1	0	1	0	0	1	0	2	5	1	1	2		O94910	1		O94910	1
P05155	IC1_HUMAN	Plasma protease C1 inhibitor OS=Homo sapiens GN=SERPING1 PE=1 SV=2 - [IC1_HUMAN]	6	14	1	1	0	0	0	1	0	1	0	8	0	1	22	11	1	1	2		P05155	1		P05155	1
Q5SZK8	FREM2_HUMAN	FRAS1-related extracellular matrix protein 2 OS=Homo sapiens GN=FREM2 PE=1 SV=2 - [FREM2_HUMAN]	0	16	0	2	0	0	2	0	0	0	0	0	0	0	18	2	1	1	2		Q5SZK8	1		Q5SZK8	1
P20711	DDC_HUMAN	Aromatic-L-amino-acid decarboxylase OS=Homo sapiens GN=DDC PE=1 SV=2 - [DDC_HUMAN]	0	8	0	0	0	0	1	0	0	0	0	3	0	0	8	4	1	1	2		P20711	1		P20711	1
P00352	AL1A1_HUMAN	Retinal dehydrogenase 1 OS=Homo sapiens GN=ALDH1A1 PE=1 SV=2 - [AL1A1_HUMAN]	0	7	0	0	0	0	0	0	0	0	0	3	0	0	7	3	1	1	2		P00352	1		P00352	1
P01008	ANT3_HUMAN	Antithrombin-III OS=Homo sapiens GN=SERPINC1 PE=1 SV=1 - [ANT3_HUMAN]	0	8	0	1	0	0	0	0	0	0	0	4	0	0	9	4	1	1	2		P01008	1		P01008	1
Q96C23	GALM_HUMAN	Aldose 1-epimerase OS=Homo sapiens GN=GALM PE=1 SV=1 - [GALM_HUMAN]	0	7	0	0	0	0	0	0	0	0	0	2	0	0	7	2	1	1	2		Q96C23	1		Q96C23	1
Q08188	TGM3_HUMAN	Protein-glutamine gamma-glutamyltransferase E OS=Homo sapiens GN=TGM3 PE=1 SV=4 - [TGM3_HUMAN]	0	5	0	0	0	0	0	0	0	0	0	0	0	7	5	7	1	1	2		Q08188	1		Q08188	1
P14543	NID1_HUMAN	Nidogen-1 OS=Homo sapiens GN=NID1 PE=1 SV=3 - [NID1_HUMAN]	0	4	0	0	0	0	0	0	0	0	3	0	0	0	4	3	1	1	2		P14543	1		P14543	1
P02647	APOA1_HUMAN	Apolipoprotein A-I OS=Homo sapiens GN=APOA1 PE=1 SV=1 - [APOA1_HUMAN]	0	4	0	0	0	0	0	0	0	0	0	5	0	0	4	5	1	1	2		P02647	1		P02647	1
O75891	AL1L1_HUMAN	Cytosolic 10-formyltetrahydrofolate dehydrogenase OS=Homo sapiens GN=ALDH1L1 PE=1 SV=2 - [AL1L1_HUMAN]	0	6	0	0	0	0	0	0	0	0	0	2	0	0	6	2	1	1	2		O75891	1		O75891	1
Q9Y646	CBPQ_HUMAN	Carboxypeptidase Q OS=Homo sapiens GN=CPQ PE=1 SV=1 - [CBPQ_HUMAN]	0	2	0	0	0	0	0	0	0	0	4	1	0	3	2	8	1	1	2		Q9Y646	1		Q9Y646	1
O60814	H2B1K_HUMAN	Histone H2B type 1-K OS=Homo sapiens GN=HIST1H2BK PE=1 SV=3 - [H2B1K_HUMAN]	0	3	0	0	0	0	0	0	1	0	0	1	0	6	3	8	1	1	2		O60814	1		O60814	1
Q99832	TCPH_HUMAN	T-complex protein 1 subunit eta OS=Homo sapiens GN=CCT7 PE=1 SV=2 - [TCPH_HUMAN]	0	2	0	0	0	0	0	0	0	0	0	2	0	0	2	2	1	1	2		Q99832	1		Q99832	1
Q24JP5	T132A_HUMAN	Transmembrane protein 132A OS=Homo sapiens GN=TMEM132A PE=2 SV=1 - [T132A_HUMAN]	0	2	0	2	0	0	0	0	0	3	0	0	0	0	4	3	1	1	2		Q24JP5	1		Q24JP5	1
P06727	APOA4_HUMAN	Apolipoprotein A-IV OS=Homo sapiens GN=APOA4 PE=1 SV=3 - [APOA4_HUMAN]	0	3	0	0	0	0	0	0	0	0	0	6	0	0	3	6	1	1	2		P06727	1		P06727	1
Q92673	SORL_HUMAN	Sortilin-related receptor OS=Homo sapiens GN=SORL1 PE=1 SV=2 - [SORL_HUMAN]	0	4	0	2	0	0	0	0	0	0	0	0	0	2	6	2	1	1	2		Q92673	1		Q92673	1
P31947	1433S_HUMAN	14-3-3 protein sigma OS=Homo sapiens GN=SFN PE=1 SV=1 - [1433S_HUMAN]	0	5	0	0	0	0	0	0	0	0	0	0	0	2	5	2	1	1	2		P31947	1		P31947	1
P01767	HV306_HUMAN	Ig heavy chain V-III region BUT OS=Homo sapiens PE=1 SV=1 - [HV306_HUMAN]	0	3	0	0	0	0	0	0	0	0	0	2	0	0	3	2	1	1	2		P01767	1		P01767	1
Q01469	FABP5_HUMAN	Fatty acid-binding protein, epidermal OS=Homo sapiens GN=FABP5 PE=1 SV=3 - [FABP5_HUMAN]	0	2	0	0	0	0	0	0	0	0	0	0	0	3	2	3	1	1	2		Q01469	1		Q01469	1
P50053	KHK_HUMAN	Ketohexokinase OS=Homo sapiens GN=KHK PE=1 SV=1 - [KHK_HUMAN]	0	2	0	0	0	0	0	0	0	0	0	2	0	0	2	2	1	1	2		P50053	1		P50053	1
P08123	CO1A2_HUMAN	Collagen alpha-2(I) chain OS=Homo sapiens GN=COL1A2 PE=1 SV=7 - [CO1A2_HUMAN]	0	2	0	2	0	0	0	0	0	3	0	0	0	0	4	3	1	1	2		P08123	1		P08123	1
P17050	NAGAB_HUMAN	Alpha-N-acetylgalactosaminidase OS=Homo sapiens GN=NAGA PE=1 SV=2 - [NAGAB_HUMAN]	0	3	0	0	0	0	0	0	0	0	5	0	0	0	3	5	1	1	2		P17050	1		P17050	1
P52209	6PGD_HUMAN	6-phosphogluconate dehydrogenase, decarboxylating OS=Homo sapiens GN=PGD PE=1 SV=3 - [6PGD_HUMAN]	0	2	0	0	0	0	0	0	0	0	0	0	0	2	2	2	1	1	2		P52209	1		P52209	1
P21695	GPDA_HUMAN	Glycerol-3-phosphate dehydrogenase [NAD(+)], cytoplasmic OS=Homo sapiens GN=GPD1 PE=1 SV=4 - [GPDA_HUMAN]	0	2	0	0	0	0	0	0	0	0	0	2	0	0	2	2	1	1	2		P21695	1		P21695	1
O95954	FTCD_HUMAN	Formimidoyltransferase-cyclodeaminase OS=Homo sapiens GN=FTCD PE=1 SV=2 - [FTCD_HUMAN]	0	2	0	0	0	0	0	0	0	0	0	7	0	0	2	7	1	1	2		O95954	1		O95954	1
P62805	H4_HUMAN	Histone H4 OS=Homo sapiens GN=HIST1H4A PE=1 SV=2 - [H4_HUMAN]	0	2	0	0	0	0	0	0	0	0	0	2	0	0	2	2	1	1	2		P62805	1		P62805	1
P25787	PSA2_HUMAN	Proteasome subunit alpha type-2 OS=Homo sapiens GN=PSMA2 PE=1 SV=2 - [PSA2_HUMAN]	0	2	0	0	0	0	0	0	0	0	0	3	0	0	2	3	1	1	2		P25787	1		P25787	1
Q99988	GDF15_HUMAN	Growth/differentiation factor 15 OS=Homo sapiens GN=GDF15 PE=1 SV=3 - [GDF15_HUMAN]	0	1	0	2	0	0	0	0	0	2	0	0	1	0	3	3	1	1	2		Q99988	1		Q99988	1
Q14315	FLNC_HUMAN	Filamin-C OS=Homo sapiens GN=FLNC PE=1 SV=3 - [FLNC_HUMAN]	0	0	0	0	2	0	0	0	0	0	2	0	0	0	2	2	1	1	2		Q14315	1		Q14315	1
P26842	CD27_HUMAN	CD27 antigen OS=Homo sapiens GN=CD27 PE=1 SV=2 - [CD27_HUMAN]	1	0	0	0	3	0	0	0	0	0	2	0	0	0	4	2	1	1	2		P26842	1		P26842	1
P81605	DCD_HUMAN	Dermcidin OS=Homo sapiens GN=DCD PE=1 SV=2 - [DCD_HUMAN]	2	0	0	0	0	0	0	0	0	0	3	0	0	1	2	4	1	1	2		P81605	1		P81605	1
P23396	RS3_HUMAN	40S ribosomal protein S3 OS=Homo sapiens GN=RPS3 PE=1 SV=2 - [RS3_HUMAN]	0	0	5	0	0	0	0	0	0	0	0	0	0	2	5	2	1	1	2		P23396	1		P23396	1
P62888	RL30_HUMAN	60S ribosomal protein L30 OS=Homo sapiens GN=RPL30 PE=1 SV=2 - [RL30_HUMAN]	0	0	3	0	0	0	0	0	0	0	0	0	0	2	3	2	1	1	2		P62888	1		P62888	1
P30050	RL12_HUMAN	60S ribosomal protein L12 OS=Homo sapiens GN=RPL12 PE=1 SV=1 - [RL12_HUMAN]	0	0	3	0	0	0	0	0	0	0	0	0	0	4	3	4	1	1	2		P30050	1		P30050	1
P13796	PLSL_HUMAN	Plastin-2 OS=Homo sapiens GN=LCP1 PE=1 SV=6 - [PLSL_HUMAN]	0	0	1	2	0	1	0	0	1	0	0	0	0	1	4	2	1	1	2		P13796	1		P13796	1
P19835	CEL_HUMAN	Bile salt-activated lipase OS=Homo sapiens GN=CEL PE=1 SV=3 - [CEL_HUMAN]	0	4	0	0	0	0	0	1	0	0	0	0	0	0	4	1	1	1	2		P19835	1		P19835	1
Q9H1C7	CYTM1_HUMAN	Cysteine-rich and transmembrane domain-containing protein 1 OS=Homo sapiens GN=CYSTM1 PE=1 SV=1 - [CYTM1_HUMAN]	1	1	1	1	1	1	1	1	2	1	1	1	1	1	6	9	1	1	2		Q9H1C7	1		Q9H1C7	1
P52565	GDIR1_HUMAN	Rho GDP-dissociation inhibitor 1 OS=Homo sapiens GN=ARHGDIA PE=1 SV=3 - [GDIR1_HUMAN]	0	0	1	0	2	2	0	1	0	0	0	0	0	1	5	2	1	1	2		P52565	1		P52565	1
P01717	LV403_HUMAN	Ig lambda chain V-IV region Hil OS=Homo sapiens PE=1 SV=1 - [LV403_HUMAN]	0	0	0	0	1	0	3	2	0	2	2	1	2	2	1	14	1	1	2		P01717	1		P01717	1
P02766	TTHY_HUMAN	Transthyretin OS=Homo sapiens GN=TTR PE=1 SV=1 - [TTHY_HUMAN]	0	7	0	4	0	0	0	1	0	0	0	0	0	0	11	1	1	1	2		P02766	1		P02766	1
Q969X1	LFG3_HUMAN	Protein lifeguard 3 OS=Homo sapiens GN=TMBIM1 PE=1 SV=2 - [LFG3_HUMAN]	0	1	0	1	0	2	0	1	0	0	0	1	1	0	4	3	1	1	2		Q969X1	1		Q969X1	1
Q9BY43	CHM4A_HUMAN	Charged multivesicular body protein 4a OS=Homo sapiens GN=CHMP4A PE=1 SV=3 - [CHM4A_HUMAN]	1	0	0	0	0	0	2	1	0	1	0	1	0	0	1	5	1	1	2		Q9BY43	1		Q9BY43	1
Q9BZG9	LYNX1_HUMAN	Ly-6/neurotoxin-like protein 1 OS=Homo sapiens GN=LYNX1 PE=1 SV=3 - [LYNX1_HUMAN]	2	1	3	3	1	0	0	1	0	0	1	0	1	1	10	4	1	1	2		Q9BZG9	1		Q9BZG9	1
P03973	SLPI_HUMAN	Antileukoproteinase OS=Homo sapiens GN=SLPI PE=1 SV=2 - [SLPI_HUMAN]	0	0	1	1	0	0	1	0	0	1	2	0	1	1	2	6	1	1	2		P03973	1		P03973	1
Q15599	NHRF2_HUMAN	Na(+)/H(+) exchange regulatory cofactor NHE-RF2 OS=Homo sapiens GN=SLC9A3R2 PE=1 SV=2 - [NHRF2_HUMAN]	0	0	0	0	0	2	0	0	0	0	0	0	1	0	2	1	1	1	2		Q15599	1		Q15599	1
O00182	LEG9_HUMAN	Galectin-9 OS=Homo sapiens GN=LGALS9 PE=1 SV=2 - [LEG9_HUMAN]	0	2	0	1	0	0	0	1	0	0	0	0	1	0	3	2	1	1	2		O00182	1		O00182	1
P42685	FRK_HUMAN	Tyrosine-protein kinase FRK OS=Homo sapiens GN=FRK PE=1 SV=1 - [FRK_HUMAN]	1	0	0	0	0	0	2	1	0	0	0	1	1	0	1	5	1	1	2		P42685	1		P42685	1
Q7Z4W1	DCXR_HUMAN	L-xylulose reductase OS=Homo sapiens GN=DCXR PE=1 SV=2 - [DCXR_HUMAN]	0	1	1	1	0	0	2	2	0	0	0	0	1	1	3	6	1	1	2		Q7Z4W1	1		Q7Z4W1	1
P00751	CFAB_HUMAN	Complement factor B OS=Homo sapiens GN=CFB PE=1 SV=2 - [CFAB_HUMAN]	0	4	0	1	0	0	1	0	0	0	0	0	0	0	5	1	1	1	2		P00751	1		P00751	1
O60701	UGDH_HUMAN	UDP-glucose 6-dehydrogenase OS=Homo sapiens GN=UGDH PE=1 SV=1 - [UGDH_HUMAN]	0	1	0	0	0	0	0	1	0	0	0	0	0	4	1	5	1	1	2		O60701	1		O60701	1
Q15365	PCBP1_HUMAN	Poly(rC)-binding protein 1 OS=Homo sapiens GN=PCBP1 PE=1 SV=2 - [PCBP1_HUMAN]	0	0	1	0	0	0	1	2	0	1	0	0	1	2	1	7	1	1	2		Q15365	1		Q15365	1
P11117	PPAL_HUMAN	Lysosomal acid phosphatase OS=Homo sapiens GN=ACP2 PE=1 SV=3 - [PPAL_HUMAN]	1	2	0	2	1	0	1	0	0	0	0	1	0	1	6	3	1	1	2		P11117	1		P11117	1
P09960	LKHA4_HUMAN	Leukotriene A-4 hydrolase OS=Homo sapiens GN=LTA4H PE=1 SV=2 - [LKHA4_HUMAN]	0	1	0	0	0	0	0	0	0	0	0	0	0	3	1	3	1	1	2		P09960	1		P09960	1
Q9NRX5	SERC1_HUMAN	Serine incorporator 1 OS=Homo sapiens GN=SERINC1 PE=1 SV=1 - [SERC1_HUMAN]	0	0	1	1	1	0	2	1	0	3	0	0	0	0	3	6	1	1	2		Q9NRX5	1		Q9NRX5	1
P35080	PROF2_HUMAN	Profilin-2 OS=Homo sapiens GN=PFN2 PE=1 SV=3 - [PROF2_HUMAN]	0	0	0	0	1	0	2	1	0	1	0	0	1	0	1	5	1	1	2		P35080	1		P35080	1
Q14568	HS902_HUMAN	Putative heat shock protein HSP 90-alpha A2 OS=Homo sapiens GN=HSP90AA2 PE=1 SV=2 - [HS902_HUMAN]	0	0	1	0	0	0	0	2	0	1	0	0	1	0	1	4	1	1	2		Q14568	1		Q14568	1
Q9UKU6	TRHDE_HUMAN	Thyrotropin-releasing hormone-degrading ectoenzyme OS=Homo sapiens GN=TRHDE PE=2 SV=1 - [TRHDE_HUMAN]	0	7	0	0	0	0	0	0	0	1	0	0	0	0	7	1	1	1	2		Q9UKU6	1		Q9UKU6	1
P12111	CO6A3_HUMAN	Collagen alpha-3(VI) chain OS=Homo sapiens GN=COL6A3 PE=1 SV=5 - [CO6A3_HUMAN]	2	6	0	0	2	0	0	0	0	1	0	0	0	0	10	1	1	1	2		P12111	1		P12111	1
Q9H2G2	SLK_HUMAN	STE20-like serine/threonine-protein kinase OS=Homo sapiens GN=SLK PE=1 SV=1 - [SLK_HUMAN]	0	0	2	0	0	1	0	1	0	0	0	0	1	0	3	2	1	1	2		Q9H2G2	1		Q9H2G2	1
Q99835	SMO_HUMAN	Smoothened homolog OS=Homo sapiens GN=SMO PE=1 SV=1 - [SMO_HUMAN]	0	0	1	0	0	0	1	0	0	2	0	0	0	0	1	3	1	1	2		Q99835	1		Q99835	1
P07948	LYN_HUMAN	Tyrosine-protein kinase Lyn OS=Homo sapiens GN=LYN PE=1 SV=3 - [LYN_HUMAN]	0	0	1	3	1	0	0	1	0	0	0	1	1	0	5	3	1	1	2		P07948	1		P07948	1
O75131	CPNE3_HUMAN	Copine-3 OS=Homo sapiens GN=CPNE3 PE=1 SV=1 - [CPNE3_HUMAN]	0	0	1	0	1	1	1	3	2	5	0	8	3	1	3	23	1	1	2		O75131	1		O75131	1
Q7Z7M0	MEGF8_HUMAN	Multiple epidermal growth factor-like domains protein 8 OS=Homo sapiens GN=MEGF8 PE=1 SV=2 - [MEGF8_HUMAN]	0	7	0	3	0	0	1	1	0	0	0	0	0	0	10	2	1	1	2		Q7Z7M0	1		Q7Z7M0	1
Q14508	WFDC2_HUMAN	WAP four-disulfide core domain protein 2 OS=Homo sapiens GN=WFDC2 PE=1 SV=2 - [WFDC2_HUMAN]	1	0	0	0	0	0	9	2	2	2	10	0	13	2	1	40	1	1	2		Q14508	1		Q14508	1
Q8TAD7	OCC1_HUMAN	Overexpressed in colon carcinoma 1 protein OS=Homo sapiens GN=OCC1 PE=1 SV=2 - [OCC1_HUMAN]	1	0	1	1	0	0	2	0	0	2	0	2	1	0	3	7	1	1	2		Q8TAD7	1		Q8TAD7	1
P50148	GNAQ_HUMAN	Guanine nucleotide-binding protein G(q) subunit alpha OS=Homo sapiens GN=GNAQ PE=1 SV=4 - [GNAQ_HUMAN]	0	0	0	0	0	2	0	0	0	0	0	1	0	0	2	1	1	1	2		P50148	1		P50148	1
Q8N3R9	MPP5_HUMAN	MAGUK p55 subfamily member 5 OS=Homo sapiens GN=MPP5 PE=1 SV=3 - [MPP5_HUMAN]	1	0	0	0	0	0	0	0	0	0	0	1	5	0	1	6	1	1	2		Q8N3R9	1		Q8N3R9	1
Q1EHB4	SC5AC_HUMAN	Sodium-coupled monocarboxylate transporter 2 OS=Homo sapiens GN=SLC5A12 PE=2 SV=2 - [SC5AC_HUMAN]	0	0	0	0	0	1	2	3	0	1	0	3	1	0	1	10	1	1	2		Q1EHB4	1		Q1EHB4	1
O60437	PEPL_HUMAN	Periplakin OS=Homo sapiens GN=PPL PE=1 SV=4 - [PEPL_HUMAN]	0	0	2	0	0	0	0	1	0	0	0	0	0	0	2	1	1	1	2		O60437	1		O60437	1
Q9NZV1	CRIM1_HUMAN	Cysteine-rich motor neuron 1 protein OS=Homo sapiens GN=CRIM1 PE=1 SV=1 - [CRIM1_HUMAN]	0	0	1	0	0	0	0	4	0	3	0	0	0	1	1	8	1	1	2		Q9NZV1	1		Q9NZV1	1
Q9H7P6	MB12B_HUMAN	Multivesicular body subunit 12B OS=Homo sapiens GN=MVB12B PE=1 SV=2 - [MB12B_HUMAN]	0	0	1	0	0	0	0	0	0	0	0	0	2	0	1	2	1	1	2		Q9H7P6	1		Q9H7P6	1
O76070	SYUG_HUMAN	Gamma-synuclein OS=Homo sapiens GN=SNCG PE=1 SV=2 - [SYUG_HUMAN]	1	0	2	0	0	0	1	0	0	0	0	0	0	0	3	1	1	1	2		O76070	1		O76070	1
P62491	RB11A_HUMAN	Ras-related protein Rab-11A OS=Homo sapiens GN=RAB11A PE=1 SV=3 - [RB11A_HUMAN]	2	0	2	0	1	1	1	1	0	1	0	0	1	1	6	5	1	1	2		P62491	1		P62491	1
O75363	BCAS1_HUMAN	Breast carcinoma-amplified sequence 1 OS=Homo sapiens GN=BCAS1 PE=1 SV=2 - [BCAS1_HUMAN]	0	0	1	0	0	2	0	1	0	0	0	0	1	0	3	2	1	1	2		O75363	1		O75363	1
Q96J84	KIRR1_HUMAN	Kin of IRRE-like protein 1 OS=Homo sapiens GN=KIRREL PE=1 SV=2 - [KIRR1_HUMAN]	0	0	0	2	0	0	1	0	0	1	0	0	0	0	2	2	1	1	2		Q96J84	1		Q96J84	1
O75631	UPK3A_HUMAN	Uroplakin-3a OS=Homo sapiens GN=UPK3A PE=1 SV=3 - [UPK3A_HUMAN]	1	0	0	1	1	0	0	1	0	2	0	0	1	0	3	4	1	1	2		O75631	1		O75631	1
Q9HBG4	VPP4_HUMAN	V-type proton ATPase 116 kDa subunit a isoform 4 OS=Homo sapiens GN=ATP6V0A4 PE=1 SV=2 - [VPP4_HUMAN]	0	0	3	0	1	0	1	0	0	1	0	0	1	0	4	3	1	1	2		Q9HBG4	1		Q9HBG4	1
Q5T2W1	NHRF3_HUMAN	Na(+)/H(+) exchange regulatory cofactor NHE-RF3 OS=Homo sapiens GN=PDZK1 PE=1 SV=2 - [NHRF3_HUMAN]	0	0	0	0	0	1	6	0	0	1	0	7	0	0	1	14	1	1	2		Q5T2W1	1		Q5T2W1	1
P06241	FYN_HUMAN	Tyrosine-protein kinase Fyn OS=Homo sapiens GN=FYN PE=1 SV=3 - [FYN_HUMAN]	0	0	1	0	0	0	0	2	0	0	0	0	0	0	1	2	1	1	2		P06241	1		P06241	1
Q9UBX5	FBLN5_HUMAN	Fibulin-5 OS=Homo sapiens GN=FBLN5 PE=1 SV=1 - [FBLN5_HUMAN]	0	1	1	1	2	0	1	0	1	0	1	0	1	1	5	5	1	1	2		Q9UBX5	1		Q9UBX5	1
Q9NQR4	NIT2_HUMAN	Omega-amidase NIT2 OS=Homo sapiens GN=NIT2 PE=1 SV=1 - [NIT2_HUMAN]	0	1	0	2	0	0	0	1	0	0	0	1	0	0	3	2	1	1	2		Q9NQR4	1		Q9NQR4	1
P14174	MIF_HUMAN	Macrophage migration inhibitory factor OS=Homo sapiens GN=MIF PE=1 SV=4 - [MIF_HUMAN]	0	1	0	0	0	1	1	1	0	0	0	1	1	2	2	6	1	1	2		P14174	1		P14174	1
P02774	VTDB_HUMAN	Vitamin D-binding protein OS=Homo sapiens GN=GC PE=1 SV=1 - [VTDB_HUMAN]	0	0	0	1	0	0	0	0	0	0	1	3	0	3	1	7	1	1	2		P02774	1		P02774	1
Q96NY7	CLIC6_HUMAN	Chloride intracellular channel protein 6 OS=Homo sapiens GN=CLIC6 PE=2 SV=3 - [CLIC6_HUMAN]	0	0	1	0	0	0	2	0	0	1	0	0	1	0	1	4	1	1	2		Q96NY7	1		Q96NY7	1
P62942	FKB1A_HUMAN	Peptidyl-prolyl cis-trans isomerase FKBP1A OS=Homo sapiens GN=FKBP1A PE=1 SV=2 - [FKB1A_HUMAN]	0	0	1	0	0	0	2	1	2	0	0	0	0	0	1	5	1	1	2		P62942	1		P62942	1
Q14894	CRYM_HUMAN	Ketimine reductase mu-crystallin OS=Homo sapiens GN=CRYM PE=1 SV=1 - [CRYM_HUMAN]	1	5	1	0	0	1	0	1	1	1	0	0	1	1	8	5	1	1	2		Q14894	1		Q14894	1
Q6P1N0	C2D1A_HUMAN	Coiled-coil and C2 domain-containing protein 1A OS=Homo sapiens GN=CC2D1A PE=1 SV=1 - [C2D1A_HUMAN]	0	0	0	0	1	0	1	2	0	0	0	0	0	0	1	3	1	1	2		Q6P1N0	1		Q6P1N0	1
Q9NP79	VTA1_HUMAN	Vacuolar protein sorting-associated protein VTA1 homolog OS=Homo sapiens GN=VTA1 PE=1 SV=1 - [VTA1_HUMAN]	3	1	0	0	0	3	0	1	0	0	0	0	0	0	7	1	1	1	2		Q9NP79	1		Q9NP79	1
Q9NUN5	LMBD1_HUMAN	Probable lysosomal cobalamin transporter OS=Homo sapiens GN=LMBRD1 PE=1 SV=1 - [LMBD1_HUMAN]	0	0	0	1	0	0	0	2	0	2	0	3	8	0	1	15	1	1	2		Q9NUN5	1		Q9NUN5	1
P15153	RAC2_HUMAN	Ras-related C3 botulinum toxin substrate 2 OS=Homo sapiens GN=RAC2 PE=1 SV=1 - [RAC2_HUMAN]	2	1	0	0	0	1	0	0	0	0	0	1	0	0	4	1	1	1	2		P15153	1		P15153	1
P07357	CO8A_HUMAN	Complement component C8 alpha chain OS=Homo sapiens GN=C8A PE=1 SV=2 - [CO8A_HUMAN]	0	2	0	0	0	0	0	1	0	0	0	0	0	0	2	1	1	1	2		P07357	1		P07357	1
P10599	THIO_HUMAN	Thioredoxin OS=Homo sapiens GN=TXN PE=1 SV=3 - [THIO_HUMAN]	1	2	0	0	0	1	0	0	0	0	0	1	0	0	4	1	1	1	2		P10599	1		P10599	1
A5D8V6	VP37C_HUMAN	Vacuolar protein sorting-associated protein 37C OS=Homo sapiens GN=VPS37C PE=1 SV=2 - [VP37C_HUMAN]	1	0	0	0	0	1	0	0	0	0	0	6	0	0	2	6	1	1	2		A5D8V6	1		A5D8V6	1
P10619	PPGB_HUMAN	Lysosomal protective protein OS=Homo sapiens GN=CTSA PE=1 SV=2 - [PPGB_HUMAN]	3	3	0	0	0	2	0	0	0	0	0	1	1	0	8	2	1	1	2		P10619	1		P10619	1
Q8N114	SHSA5_HUMAN	Protein shisa-5 OS=Homo sapiens GN=SHISA5 PE=1 SV=1 - [SHSA5_HUMAN]	0	0	0	1	1	0	1	2	3	0	2	0	1	0	2	9	1	1	2		Q8N114	1		Q8N114	1
P30039	PBLD_HUMAN	Phenazine biosynthesis-like domain-containing protein OS=Homo sapiens GN=PBLD PE=1 SV=2 - [PBLD_HUMAN]	0	4	0	0	0	0	0	0	0	0	0	1	0	1	4	2	1	1	2		P30039	1		P30039	1
P19827	ITIH1_HUMAN	Inter-alpha-trypsin inhibitor heavy chain H1 OS=Homo sapiens GN=ITIH1 PE=1 SV=3 - [ITIH1_HUMAN]	0	2	0	0	0	0	0	1	0	0	0	0	0	0	2	1	1	1	2		P19827	1		P19827	1
P15428	PGDH_HUMAN	15-hydroxyprostaglandin dehydrogenase [NAD(+)] OS=Homo sapiens GN=HPGD PE=1 SV=1 - [PGDH_HUMAN]	1	1	1	0	0	2	1	1	0	0	0	0	0	0	5	2	1	1	2		P15428	1		P15428	1
Q03154	ACY1_HUMAN	Aminoacylase-1 OS=Homo sapiens GN=ACY1 PE=1 SV=1 - [ACY1_HUMAN]	0	9	0	1	1	0	1	0	0	0	1	1	0	0	11	3	1	1	2		Q03154	1		Q03154	1
P21810	PGS1_HUMAN	Biglycan OS=Homo sapiens GN=BGN PE=1 SV=2 - [PGS1_HUMAN]	0	3	1	1	0	0	0	0	0	0	0	0	1	0	5	1	1	1	2		P21810	1		P21810	1
P16083	NQO2_HUMAN	Ribosyldihydronicotinamide dehydrogenase [quinone] OS=Homo sapiens GN=NQO2 PE=1 SV=5 - [NQO2_HUMAN]	0	2	0	0	0	0	0	1	0	0	0	1	0	0	2	2	1	1	2		P16083	1		P16083	1
P21796	VDAC1_HUMAN	Voltage-dependent anion-selective channel protein 1 OS=Homo sapiens GN=VDAC1 PE=1 SV=2 - [VDAC1_HUMAN]	0	0	0	0	1	0	1	3	0	2	3	0	1	2	1	12	1	1	2		P21796	1		P21796	1
P55290	CAD13_HUMAN	Cadherin-13 OS=Homo sapiens GN=CDH13 PE=1 SV=1 - [CAD13_HUMAN]	0	0	0	0	0	1	0	1	0	0	2	0	2	0	1	5	1	1	2		P55290	1		P55290	1
Q96MM7	H6ST2_HUMAN	Heparan-sulfate 6-O-sulfotransferase 2 OS=Homo sapiens GN=HS6ST2 PE=2 SV=2 - [H6ST2_HUMAN]	0	2	1	0	0	0	0	1	0	0	0	0	0	0	3	1	1	1	2		Q96MM7	1		Q96MM7	1
P15586	GNS_HUMAN	N-acetylglucosamine-6-sulfatase OS=Homo sapiens GN=GNS PE=1 SV=3 - [GNS_HUMAN]	0	0	0	0	1	0	1	1	0	0	4	0	1	0	1	7	1	1	2		P15586	1		P15586	1
P29373	RABP2_HUMAN	Cellular retinoic acid-binding protein 2 OS=Homo sapiens GN=CRABP2 PE=1 SV=2 - [RABP2_HUMAN]	0	0	1	1	0	0	1	2	0	1	0	0	0	2	2	6	1	1	2		P29373	1		P29373	1
Q96RW7	HMCN1_HUMAN	Hemicentin-1 OS=Homo sapiens GN=HMCN1 PE=1 SV=2 - [HMCN1_HUMAN]	0	0	0	0	2	0	0	1	0	0	0	0	1	1	2	3	1	1	2		Q96RW7	1		Q96RW7	1
Q9H9H4	VP37B_HUMAN	Vacuolar protein sorting-associated protein 37B OS=Homo sapiens GN=VPS37B PE=1 SV=1 - [VP37B_HUMAN]	0	1	0	0	0	0	0	0	1	0	0	4	0	0	1	5	1	1	2		Q9H9H4	1		Q9H9H4	1
Q9UBQ7	GRHPR_HUMAN	Glyoxylate reductase/hydroxypyruvate reductase OS=Homo sapiens GN=GRHPR PE=1 SV=1 - [GRHPR_HUMAN]	0	2	0	0	0	0	0	1	0	0	0	0	0	0	2	1	1	1	2		Q9UBQ7	1		Q9UBQ7	1
O00764	PDXK_HUMAN	Pyridoxal kinase OS=Homo sapiens GN=PDXK PE=1 SV=1 - [PDXK_HUMAN]	0	4	0	0	0	0	0	0	0	0	0	1	0	0	4	1	1	1	2		O00764	1		O00764	1
P30044	PRDX5_HUMAN	Peroxiredoxin-5, mitochondrial OS=Homo sapiens GN=PRDX5 PE=1 SV=4 - [PRDX5_HUMAN]	0	2	0	0	0	1	0	0	0	0	0	1	0	0	3	1	1	1	2		P30044	1		P30044	1
P09467	F16P1_HUMAN	Fructose-1,6-bisphosphatase 1 OS=Homo sapiens GN=FBP1 PE=1 SV=5 - [F16P1_HUMAN]	1	14	0	0	0	1	0	0	0	0	0	1	0	0	16	1	1	1	2		P09467	1		P09467	1
Q13126	MTAP_HUMAN	S-methyl-5'-thioadenosine phosphorylase OS=Homo sapiens GN=MTAP PE=1 SV=2 - [MTAP_HUMAN]	0	1	2	0	0	0	0	1	0	0	0	0	0	0	3	1	1	1	2		Q13126	1		Q13126	1
Q9BUT1	BDH2_HUMAN	3-hydroxybutyrate dehydrogenase type 2 OS=Homo sapiens GN=BDH2 PE=1 SV=2 - [BDH2_HUMAN]	0	1	0	2	0	0	0	0	0	0	0	1	0	0	3	1	1	1	2		Q9BUT1	1		Q9BUT1	1
O43707	ACTN4_HUMAN	Alpha-actinin-4 OS=Homo sapiens GN=ACTN4 PE=1 SV=2 - [ACTN4_HUMAN]	0	4	0	1	0	4	0	1	0	0	0	0	0	0	9	1	1	1	2		O43707	1		O43707	1
P12273	PIP_HUMAN	Prolactin-inducible protein OS=Homo sapiens GN=PIP PE=1 SV=1 - [PIP_HUMAN]	0	2	0	0	0	2	0	0	0	0	1	0	0	0	4	1	1	1	2		P12273	1		P12273	1
Q12794	HYAL1_HUMAN	Hyaluronidase-1 OS=Homo sapiens GN=HYAL1 PE=1 SV=2 - [HYAL1_HUMAN]	0	5	0	4	0	0	0	1	0	0	0	0	0	0	9	1	1	1	2		Q12794	1		Q12794	1
P78380	OLR1_HUMAN	Oxidized low-density lipoprotein receptor 1 OS=Homo sapiens GN=OLR1 PE=1 SV=1 - [OLR1_HUMAN]	0	1	0	1	0	0	2	0	0	3	0	0	0	0	2	5	1	1	2		P78380	1		P78380	1
P61916	NPC2_HUMAN	Epididymal secretory protein E1 OS=Homo sapiens GN=NPC2 PE=1 SV=1 - [NPC2_HUMAN]	0	0	0	0	1	0	2	2	0	1	3	1	2	2	1	13	1	1	2		P61916	1		P61916	1
Q13332	PTPRS_HUMAN	Receptor-type tyrosine-protein phosphatase S OS=Homo sapiens GN=PTPRS PE=1 SV=3 - [PTPRS_HUMAN]	0	3	0	1	0	0	0	1	0	1	0	0	0	0	4	2	1	1	2		Q13332	1		Q13332	1
O75594	PGRP1_HUMAN	Peptidoglycan recognition protein 1 OS=Homo sapiens GN=PGLYRP1 PE=1 SV=1 - [PGRP1_HUMAN]	0	8	2	1	0	0	0	0	0	0	1	0	0	0	11	1	1	1	2		O75594	1		O75594	1
P19823	ITIH2_HUMAN	Inter-alpha-trypsin inhibitor heavy chain H2 OS=Homo sapiens GN=ITIH2 PE=1 SV=2 - [ITIH2_HUMAN]	0	1	0	0	0	0	0	1	0	0	0	2	0	0	1	3	1	1	2		P19823	1		P19823	1
O14498	ISLR_HUMAN	Immunoglobulin superfamily containing leucine-rich repeat protein OS=Homo sapiens GN=ISLR PE=1 SV=1 - [ISLR_HUMAN]	0	3	0	0	0	0	0	1	0	0	0	0	0	0	3	1	1	1	2		O14498	1		O14498	1
O75787	RENR_HUMAN	Renin receptor OS=Homo sapiens GN=ATP6AP2 PE=1 SV=2 - [RENR_HUMAN]	0	5	0	0	0	0	0	0	0	0	0	1	0	0	5	1	1	1	2		O75787	1		O75787	1
P07288	KLK3_HUMAN	Prostate-specific antigen OS=Homo sapiens GN=KLK3 PE=1 SV=2 - [KLK3_HUMAN]	0	0	0	0	0	1	1	0	2	1	0	0	0	1	1	5	1	1	2		P07288	1		P07288	1
P24855	DNAS1_HUMAN	Deoxyribonuclease-1 OS=Homo sapiens GN=DNASE1 PE=1 SV=1 - [DNAS1_HUMAN]	4	6	0	4	2	1	0	1	0	0	0	1	0	0	17	2	1	1	2		P24855	1		P24855	1
P21926	CD9_HUMAN	CD9 antigen OS=Homo sapiens GN=CD9 PE=1 SV=4 - [CD9_HUMAN]	2	2	0	0	0	5	0	1	0	0	0	1	1	0	9	3	1	1	2		P21926	1		P21926	1
O94919	ENDD1_HUMAN	Endonuclease domain-containing 1 protein OS=Homo sapiens GN=ENDOD1 PE=1 SV=2 - [ENDD1_HUMAN]	0	0	0	0	0	1	0	0	2	0	5	0	0	0	1	7	1	1	2		O94919	1		O94919	1
P48745	NOV_HUMAN	Protein NOV homolog OS=Homo sapiens GN=NOV PE=1 SV=1 - [NOV_HUMAN]	0	0	0	1	0	0	1	0	0	1	0	0	2	1	1	5	1	1	2		P48745	1		P48745	1
Q9GZP0	PDGFD_HUMAN	Platelet-derived growth factor D OS=Homo sapiens GN=PDGFD PE=1 SV=1 - [PDGFD_HUMAN]	0	1	0	0	0	0	0	2	0	1	0	0	0	0	1	3	1	1	2		Q9GZP0	1		Q9GZP0	1
P03951	FA11_HUMAN	Coagulation factor XI OS=Homo sapiens GN=F11 PE=1 SV=1 - [FA11_HUMAN]	0	4	0	1	0	0	0	1	0	1	0	0	0	1	5	3	1	1	2		P03951	1		P03951	1
O14786	NRP1_HUMAN	Neuropilin-1 OS=Homo sapiens GN=NRP1 PE=1 SV=3 - [NRP1_HUMAN]	0	2	0	2	0	0	1	1	0	1	0	0	0	0	4	3	1	1	2		O14786	1		O14786	1
Q8N695	SC5A8_HUMAN	Sodium-coupled monocarboxylate transporter 1 OS=Homo sapiens GN=SLC5A8 PE=1 SV=2 - [SC5A8_HUMAN]	0	0	0	0	2	0	0	0	0	0	0	1	0	0	2	1	1	1	2		Q8N695	1		Q8N695	1
P15289	ARSA_HUMAN	Arylsulfatase A OS=Homo sapiens GN=ARSA PE=1 SV=3 - [ARSA_HUMAN]	0	4	0	0	0	0	0	1	0	0	0	1	0	0	4	2	1	1	2		P15289	1		P15289	1
P16070	CD44_HUMAN	CD44 antigen OS=Homo sapiens GN=CD44 PE=1 SV=3 - [CD44_HUMAN]	1	0	0	0	0	1	0	0	0	0	1	0	5	1	2	7	1	1	2		P16070	1		P16070	1
P43652	AFAM_HUMAN	Afamin OS=Homo sapiens GN=AFM PE=1 SV=1 - [AFAM_HUMAN]	0	0	0	1	0	0	2	0	0	0	1	1	3	0	1	7	1	1	2		P43652	1		P43652	1
Q9HD89	RETN_HUMAN	Resistin OS=Homo sapiens GN=RETN PE=2 SV=1 - [RETN_HUMAN]	0	0	0	1	1	0	2	0	0	2	3	0	3	0	2	10	1	1	2		Q9HD89	1		Q9HD89	1
P01616	KV203_HUMAN	Ig kappa chain V-II region MIL OS=Homo sapiens PE=1 SV=1 - [KV203_HUMAN]	1	1	0	0	2	2	0	0	0	0	0	1	0	0	6	1	1	1	2		P01616	1		P01616	1
P05451	REG1A_HUMAN	Lithostathine-1-alpha OS=Homo sapiens GN=REG1A PE=1 SV=3 - [REG1A_HUMAN]	0	0	0	0	2	0	1	1	0	0	1	0	1	0	2	4	1	1	2		P05451	1		P05451	1
P53801	PTTG_HUMAN	Pituitary tumor-transforming gene 1 protein-interacting protein OS=Homo sapiens GN=PTTG1IP PE=1 SV=1 - [PTTG_HUMAN]	1	0	0	0	0	4	0	0	0	0	0	1	0	0	5	1	1	1	2		P53801	1		P53801	1
O95342	ABCBB_HUMAN	Bile salt export pump OS=Homo sapiens GN=ABCB11 PE=1 SV=2 - [ABCBB_HUMAN]	2	1	0	0	0	2	0	0	0	0	0	1	0	0	5	1	1	1	2		O95342	1		O95342	1
P08134	RHOC_HUMAN	Rho-related GTP-binding protein RhoC OS=Homo sapiens GN=RHOC PE=1 SV=1 - [RHOC_HUMAN]	0	0	0	0	0	3	0	1	0	0	0	0	0	0	3	1	1	1	2		P08134	1		P08134	1
P21266	GSTM3_HUMAN	Glutathione S-transferase Mu 3 OS=Homo sapiens GN=GSTM3 PE=1 SV=3 - [GSTM3_HUMAN]	0	4	1	0	0	2	0	0	0	0	0	1	0	0	7	1	1	1	2		P21266	1		P21266	1
O14493	CLD4_HUMAN	Claudin-4 OS=Homo sapiens GN=CLDN4 PE=1 SV=1 - [CLD4_HUMAN]	0	0	0	0	0	3	0	0	0	0	0	1	0	0	3	1	1	1	2		O14493	1		O14493	1
P61019	RAB2A_HUMAN	Ras-related protein Rab-2A OS=Homo sapiens GN=RAB2A PE=1 SV=1 - [RAB2A_HUMAN]	0	1	0	0	0	2	0	0	0	0	0	1	0	0	3	1	1	1	2		P61019	1		P61019	1
P01019	ANGT_HUMAN	Angiotensinogen OS=Homo sapiens GN=AGT PE=1 SV=1 - [ANGT_HUMAN]	0	1	0	1	0	1	1	0	2	0	0	0	0	0	3	3	1	1	2		P01019	1		P01019	1
P08962	CD63_HUMAN	CD63 antigen OS=Homo sapiens GN=CD63 PE=1 SV=2 - [CD63_HUMAN]	2	0	0	0	0	2	0	0	0	0	0	1	0	0	4	1	1	1	2		P08962	1		P08962	1
P30046	DOPD_HUMAN	D-dopachrome decarboxylase OS=Homo sapiens GN=DDT PE=1 SV=3 - [DOPD_HUMAN]	0	0	0	0	0	2	0	0	0	0	0	1	0	0	2	1	1	1	2		P30046	1		P30046	1
O15484	CAN5_HUMAN	Calpain-5 OS=Homo sapiens GN=CAPN5 PE=1 SV=2 - [CAN5_HUMAN]	0	0	0	0	0	1	0	0	0	0	0	2	0	0	1	2	1	1	2		O15484	1		O15484	1
Q8IY95	TM192_HUMAN	Transmembrane protein 192 OS=Homo sapiens GN=TMEM192 PE=1 SV=1 - [TM192_HUMAN]	0	0	0	0	0	1	0	0	0	0	0	2	0	0	1	2	1	1	2		Q8IY95	1		Q8IY95	1
P49747	COMP_HUMAN	Cartilage oligomeric matrix protein OS=Homo sapiens GN=COMP PE=1 SV=2 - [COMP_HUMAN]	0	1	0	1	0	0	0	7	0	0	0	0	0	0	2	7	1	1	2		P49747	1		P49747	1
P80748	LV302_HUMAN	Ig lambda chain V-III region LOI OS=Homo sapiens PE=1 SV=1 - [LV302_HUMAN]	0	1	0	0	0	0	1	3	0	0	3	2	0	0	1	9	1	1	2		P80748	1		P80748	1
P43234	CATO_HUMAN	Cathepsin O OS=Homo sapiens GN=CTSO PE=2 SV=1 - [CATO_HUMAN]	0	0	0	1	0	0	0	2	0	0	0	0	0	0	1	2	1	1	2		P43234	1		P43234	1
O95171	SCEL_HUMAN	Sciellin OS=Homo sapiens GN=SCEL PE=1 SV=2 - [SCEL_HUMAN]	0	3	0	0	0	0	0	1	0	0	0	0	0	0	3	1	1	1	2		O95171	1		O95171	1
Q86T13	CLC14_HUMAN	C-type lectin domain family 14 member A OS=Homo sapiens GN=CLEC14A PE=1 SV=1 - [CLC14_HUMAN]	0	0	0	1	0	0	2	3	0	2	0	0	0	0	1	7	1	1	2		Q86T13	1		Q86T13	1
O00115	DNS2A_HUMAN	Deoxyribonuclease-2-alpha OS=Homo sapiens GN=DNASE2 PE=1 SV=2 - [DNS2A_HUMAN]	0	2	0	1	0	0	1	1	0	0	0	0	1	0	3	3	1	1	2		O00115	1		O00115	1
Q6XQN6	PNCB_HUMAN	Nicotinate phosphoribosyltransferase OS=Homo sapiens GN=NAPRT PE=1 SV=2 - [PNCB_HUMAN]	0	3	0	1	0	0	0	1	0	0	0	0	0	1	4	2	1	1	2		Q6XQN6	1		Q6XQN6	1
Q8IUL8	CILP2_HUMAN	Cartilage intermediate layer protein 2 OS=Homo sapiens GN=CILP2 PE=2 SV=2 - [CILP2_HUMAN]	0	2	2	3	0	0	1	1	0	0	0	0	0	0	7	2	1	1	2		Q8IUL8	1		Q8IUL8	1
P56537	IF6_HUMAN	Eukaryotic translation initiation factor 6 OS=Homo sapiens GN=EIF6 PE=1 SV=1 - [IF6_HUMAN]	0	5	0	0	0	0	0	1	0	0	0	0	0	0	5	1	1	1	2		P56537	1		P56537	1
P02750	A2GL_HUMAN	Leucine-rich alpha-2-glycoprotein OS=Homo sapiens GN=LRG1 PE=1 SV=2 - [A2GL_HUMAN]	0	1	0	0	0	0	0	1	2	0	6	0	0	0	1	9	1	1	2		P02750	1		P02750	1
Q96IU4	ABHEB_HUMAN	Alpha/beta hydrolase domain-containing protein 14B OS=Homo sapiens GN=ABHD14B PE=1 SV=1 - [ABHEB_HUMAN]	0	2	0	0	0	0	0	1	1	0	0	0	0	0	2	2	1	1	2		Q96IU4	1		Q96IU4	1
Q9UIV8	SPB13_HUMAN	Serpin B13 OS=Homo sapiens GN=SERPINB13 PE=1 SV=2 - [SPB13_HUMAN]	0	10	0	0	0	0	0	0	0	0	0	0	0	1	10	1	1	1	2		Q9UIV8	1		Q9UIV8	1
P17174	AATC_HUMAN	Aspartate aminotransferase, cytoplasmic OS=Homo sapiens GN=GOT1 PE=1 SV=3 - [AATC_HUMAN]	0	12	0	1	0	0	0	0	0	0	0	0	0	1	13	1	1	1	2		P17174	1		P17174	1
Q9HB40	RISC_HUMAN	Retinoid-inducible serine carboxypeptidase OS=Homo sapiens GN=SCPEP1 PE=1 SV=1 - [RISC_HUMAN]	0	4	0	0	0	0	0	0	0	0	0	0	0	1	4	1	1	1	2		Q9HB40	1		Q9HB40	1
P35558	PCKGC_HUMAN	Phosphoenolpyruvate carboxykinase, cytosolic [GTP] OS=Homo sapiens GN=PCK1 PE=1 SV=3 - [PCKGC_HUMAN]	0	4	0	0	0	0	0	0	0	0	0	1	0	0	4	1	1	1	2		P35558	1		P35558	1
P30740	ILEU_HUMAN	Leukocyte elastase inhibitor OS=Homo sapiens GN=SERPINB1 PE=1 SV=1 - [ILEU_HUMAN]	0	4	0	0	0	0	0	0	1	0	0	0	0	0	4	1	1	1	2		P30740	1		P30740	1
P39060	COIA1_HUMAN	Collagen alpha-1(XVIII) chain OS=Homo sapiens GN=COL18A1 PE=1 SV=5 - [COIA1_HUMAN]	0	3	0	0	0	0	1	0	0	0	0	0	0	0	3	1	1	1	2		P39060	1		P39060	1
O94760	DDAH1_HUMAN	N(G),N(G)-dimethylarginine dimethylaminohydrolase 1 OS=Homo sapiens GN=DDAH1 PE=1 SV=3 - [DDAH1_HUMAN]	0	2	0	0	0	0	0	0	0	0	0	1	0	0	2	1	1	1	2		O94760	1		O94760	1
P05089	ARGI1_HUMAN	Arginase-1 OS=Homo sapiens GN=ARG1 PE=1 SV=2 - [ARGI1_HUMAN]	0	3	0	0	0	0	0	0	0	0	0	0	0	1	3	1	1	1	2		P05089	1		P05089	1
Q6UWR7	ENPP6_HUMAN	Ectonucleotide pyrophosphatase/phosphodiesterase family member 6 OS=Homo sapiens GN=ENPP6 PE=1 SV=2 - [ENPP6_HUMAN]	0	1	0	0	0	0	0	0	0	0	0	7	0	0	1	7	1	1	2		Q6UWR7	1		Q6UWR7	1
P02042	HBD_HUMAN	Hemoglobin subunit delta OS=Homo sapiens GN=HBD PE=1 SV=2 - [HBD_HUMAN]	0	3	0	0	0	0	0	0	0	0	1	0	0	0	3	1	1	1	2		P02042	1		P02042	1
P43251	BTD_HUMAN	Biotinidase OS=Homo sapiens GN=BTD PE=1 SV=2 - [BTD_HUMAN]	0	2	0	1	0	0	0	0	0	0	1	0	0	0	3	1	1	1	2		P43251	1		P43251	1
P09668	CATH_HUMAN	Pro-cathepsin H OS=Homo sapiens GN=CTSH PE=1 SV=4 - [CATH_HUMAN]	0	2	0	0	0	0	0	0	0	0	0	1	0	0	2	1	1	1	2		P09668	1		P09668	1
Q9Y653	GPR56_HUMAN	G-protein coupled receptor 56 OS=Homo sapiens GN=GPR56 PE=1 SV=2 - [GPR56_HUMAN]	0	2	0	1	0	0	0	0	0	1	0	0	0	0	3	1	1	1	2		Q9Y653	1		Q9Y653	1
P10319	1B58_HUMAN	HLA class I histocompatibility antigen, B-58 alpha chain OS=Homo sapiens GN=HLA-B PE=1 SV=1 - [1B58_HUMAN]	0	1	0	2	0	0	0	0	0	0	0	1	0	0	3	1	1	1	2		P10319	1		P10319	1
P36952	SPB5_HUMAN	Serpin B5 OS=Homo sapiens GN=SERPINB5 PE=1 SV=2 - [SPB5_HUMAN]	0	1	0	0	0	0	0	0	0	0	0	0	0	6	1	6	1	1	2		P36952	1		P36952	1
P61160	ARP2_HUMAN	Actin-related protein 2 OS=Homo sapiens GN=ACTR2 PE=1 SV=1 - [ARP2_HUMAN]	0	1	0	0	0	0	0	0	0	0	0	0	0	3	1	3	1	1	2		P61160	1		P61160	1
Q86TH1	ATL2_HUMAN	ADAMTS-like protein 2 OS=Homo sapiens GN=ADAMTSL2 PE=1 SV=1 - [ATL2_HUMAN]	0	3	0	2	0	0	0	0	0	1	0	0	0	0	5	1	1	1	2		Q86TH1	1		Q86TH1	1
P59998	ARPC4_HUMAN	Actin-related protein 2/3 complex subunit 4 OS=Homo sapiens GN=ARPC4 PE=1 SV=3 - [ARPC4_HUMAN]	0	2	0	0	0	0	0	0	0	0	0	1	0	0	2	1	1	1	2		P59998	1		P59998	1
P30153	2AAA_HUMAN	Serine/threonine-protein phosphatase 2A 65 kDa regulatory subunit A alpha isoform OS=Homo sapiens GN=PPP2R1A PE=1 SV=4 - [2AAA_HUMAN]	0	2	0	0	0	0	0	0	0	0	0	1	0	0	2	1	1	1	2		P30153	1		P30153	1
O95154	ARK73_HUMAN	Aflatoxin B1 aldehyde reductase member 3 OS=Homo sapiens GN=AKR7A3 PE=1 SV=2 - [ARK73_HUMAN]	0	2	0	0	0	0	0	0	0	0	0	1	0	0	2	1	1	1	2		O95154	1		O95154	1
O75340	PDCD6_HUMAN	Programmed cell death protein 6 OS=Homo sapiens GN=PDCD6 PE=1 SV=1 - [PDCD6_HUMAN]	0	1	0	0	0	0	0	0	0	0	0	2	0	0	1	2	1	1	2		O75340	1		O75340	1
P04216	THY1_HUMAN	Thy-1 membrane glycoprotein OS=Homo sapiens GN=THY1 PE=1 SV=2 - [THY1_HUMAN]	0	2	0	0	0	0	0	0	0	0	0	1	0	0	2	1	1	1	2		P04216	1		P04216	1
Q06278	AOXA_HUMAN	Aldehyde oxidase OS=Homo sapiens GN=AOX1 PE=1 SV=2 - [AOXA_HUMAN]	0	2	0	0	0	0	0	0	0	0	0	1	0	0	2	1	1	1	2		Q06278	1		Q06278	1
Q92820	GGH_HUMAN	Gamma-glutamyl hydrolase OS=Homo sapiens GN=GGH PE=1 SV=2 - [GGH_HUMAN]	1	1	0	0	0	0	0	0	0	0	1	3	0	0	2	4	1	1	2		Q92820	1		Q92820	1
Q14956	GPNMB_HUMAN	Transmembrane glycoprotein NMB OS=Homo sapiens GN=GPNMB PE=1 SV=2 - [GPNMB_HUMAN]	0	1	0	0	0	0	0	0	0	0	0	3	0	0	1	3	1	1	2		Q14956	1		Q14956	1
P00746	CFAD_HUMAN	Complement factor D OS=Homo sapiens GN=CFD PE=1 SV=5 - [CFAD_HUMAN]	0	1	0	0	0	0	0	0	0	2	0	0	0	0	1	2	1	1	2		P00746	1		P00746	1
Q9H1E1	RNAS7_HUMAN	Ribonuclease 7 OS=Homo sapiens GN=RNASE7 PE=1 SV=2 - [RNAS7_HUMAN]	0	2	0	0	0	0	0	0	0	0	0	0	0	1	2	1	1	1	2		Q9H1E1	1		Q9H1E1	1
Q9Y376	CAB39_HUMAN	Calcium-binding protein 39 OS=Homo sapiens GN=CAB39 PE=1 SV=1 - [CAB39_HUMAN]	0	1	0	0	0	0	0	0	0	0	0	2	0	0	1	2	1	1	2		Q9Y376	1		Q9Y376	1
Q96G03	PGM2_HUMAN	Phosphoglucomutase-2 OS=Homo sapiens GN=PGM2 PE=1 SV=4 - [PGM2_HUMAN]	0	1	0	0	0	0	0	0	0	0	0	0	0	2	1	2	1	1	2		Q96G03	1		Q96G03	1
O43280	TREA_HUMAN	Trehalase OS=Homo sapiens GN=TREH PE=1 SV=2 - [TREA_HUMAN]	0	1	0	0	0	0	0	0	0	0	0	2	0	0	1	2	1	1	2		O43280	1		O43280	1
P36543	VATE1_HUMAN	V-type proton ATPase subunit E 1 OS=Homo sapiens GN=ATP6V1E1 PE=1 SV=1 - [VATE1_HUMAN]	0	1	0	0	0	0	0	0	0	0	0	2	0	0	1	2	1	1	2		P36543	1		P36543	1
P34932	HSP74_HUMAN	Heat shock 70 kDa protein 4 OS=Homo sapiens GN=HSPA4 PE=1 SV=4 - [HSP74_HUMAN]	0	1	0	0	0	0	0	0	0	0	0	0	0	2	1	2	1	1	2		P34932	1		P34932	1
P05026	AT1B1_HUMAN	Sodium/potassium-transporting ATPase subunit beta-1 OS=Homo sapiens GN=ATP1B1 PE=1 SV=1 - [AT1B1_HUMAN]	0	1	0	0	1	0	0	0	0	0	0	3	0	0	2	3	1	1	2		P05026	1		P05026	1
P05937	CALB1_HUMAN	Calbindin OS=Homo sapiens GN=CALB1 PE=1 SV=2 - [CALB1_HUMAN]	1	0	0	0	0	0	0	0	0	0	0	5	0	0	1	5	1	1	2		P05937	1		P05937	1
P09237	MMP7_HUMAN	Matrilysin OS=Homo sapiens GN=MMP7 PE=1 SV=1 - [MMP7_HUMAN]	0	0	0	1	0	0	0	0	0	0	0	2	0	0	1	2	1	1	2		P09237	1		P09237	1
Q86UX2	ITIH5_HUMAN	Inter-alpha-trypsin inhibitor heavy chain H5 OS=Homo sapiens GN=ITIH5 PE=2 SV=2 - [ITIH5_HUMAN]	0	0	0	2	0	0	0	0	0	1	0	0	0	0	2	1	1	1	2		Q86UX2	1		Q86UX2	1
P08572	CO4A2_HUMAN	Collagen alpha-2(IV) chain OS=Homo sapiens GN=COL4A2 PE=1 SV=4 - [CO4A2_HUMAN]	0	0	0	1	0	0	0	0	0	4	0	0	0	0	1	4	1	1	2		P08572	1		P08572	1
Q92956	TNR14_HUMAN	Tumor necrosis factor receptor superfamily member 14 OS=Homo sapiens GN=TNFRSF14 PE=1 SV=3 - [TNR14_HUMAN]	0	0	0	0	1	0	0	0	0	0	2	0	1	0	1	3	1	1	2		Q92956	1		Q92956	1
P50990	TCPQ_HUMAN	T-complex protein 1 subunit theta OS=Homo sapiens GN=CCT8 PE=1 SV=4 - [TCPQ_HUMAN]	0	0	4	0	0	0	0	0	0	0	0	0	0	1	4	1	1	1	2		P50990	1		P50990	1
P07814	SYEP_HUMAN	Bifunctional glutamate/proline--tRNA ligase OS=Homo sapiens GN=EPRS PE=1 SV=5 - [SYEP_HUMAN]	0	0	1	0	0	0	0	0	0	0	0	0	0	2	1	2	1	1	2		P07814	1		P07814	1
Q9Y6R7	FCGBP_HUMAN	IgGFc-binding protein OS=Homo sapiens GN=FCGBP PE=1 SV=3 - [FCGBP_HUMAN]	0	0	0	0	0	0	1	1	3	4	0	4	1	0	0	14	0	1	1		P01777	1		Q9Y6R7	1
P05164	PERM_HUMAN	Myeloperoxidase OS=Homo sapiens GN=MPO PE=1 SV=1 - [PERM_HUMAN]	0	0	0	0	0	0	0	3	7	0	0	0	0	5	0	15	0	1	1		P04259	1		P05164	1
P13164	IFM1_HUMAN	Interferon-induced transmembrane protein 1 OS=Homo sapiens GN=IFITM1 PE=1 SV=3 - [IFM1_HUMAN]	0	0	0	0	0	0	3	1	2	1	1	1	0	0	0	9	0	1	1		P13646	1		P13164	1
P20160	CAP7_HUMAN	Azurocidin OS=Homo sapiens GN=AZU1 PE=1 SV=3 - [CAP7_HUMAN]	0	0	0	0	0	0	0	1	2	0	0	0	0	1	0	4	0	1	1		Q96P63	1		P20160	1
Q15833	STXB2_HUMAN	Syntaxin-binding protein 2 OS=Homo sapiens GN=STXBP2 PE=1 SV=2 - [STXB2_HUMAN]	0	0	0	0	0	0	0	0	0	0	0	6	0	0	0	6	0	1	1		P36871	1		Q15833	1
Q96NY8	PVRL4_HUMAN	Nectin-4 OS=Homo sapiens GN=PVRL4 PE=1 SV=1 - [PVRL4_HUMAN]	0	0	0	0	0	0	3	2	0	0	0	0	1	2	0	8	0	1	1		P68371	1		Q96NY8	1
Q9H2K8	TAOK3_HUMAN	Serine/threonine-protein kinase TAO3 OS=Homo sapiens GN=TAOK3 PE=1 SV=2 - [TAOK3_HUMAN]	0	0	0	0	0	0	1	2	0	0	0	0	1	0	0	4	0	1	1		P61981	1		Q9H2K8	1
P61586	RHOA_HUMAN	Transforming protein RhoA OS=Homo sapiens GN=RHOA PE=1 SV=1 - [RHOA_HUMAN]	0	0	0	0	0	0	2	0	0	0	0	3	0	0	0	5	0	1	1		Q9Y6W5	1		P61586	1
P01891	1A68_HUMAN	HLA class I histocompatibility antigen, A-68 alpha chain OS=Homo sapiens GN=HLA-A PE=1 SV=4 - [1A68_HUMAN]	0	0	0	0	0	0	2	0	0	2	0	0	2	3	0	9	0	1	1		P62070	1		P01891	1
Q9UBP0	SPAST_HUMAN	Spastin OS=Homo sapiens GN=SPAST PE=1 SV=1 - [SPAST_HUMAN]	0	0	0	0	0	0	0	2	0	0	0	0	0	0	0	2	0	1	1		P12955	1		Q9UBP0	1
Q13443	ADAM9_HUMAN	Disintegrin and metalloproteinase domain-containing protein 9 OS=Homo sapiens GN=ADAM9 PE=1 SV=1 - [ADAM9_HUMAN]	0	0	0	0	0	0	0	0	0	0	0	0	4	0	0	4	0	1	1		O43505	1		Q13443	1
Q96FL8	S47A1_HUMAN	Multidrug and toxin extrusion protein 1 OS=Homo sapiens GN=SLC47A1 PE=1 SV=1 - [S47A1_HUMAN]	0	0	0	0	0	0	2	0	0	0	0	0	1	0	0	3	0	1	1		Q9H2M3	1		Q96FL8	1
P11234	RALB_HUMAN	Ras-related protein Ral-B OS=Homo sapiens GN=RALB PE=1 SV=1 - [RALB_HUMAN]	0	0	0	0	0	0	2	1	0	0	0	1	0	0	0	4	0	1	1		O43657	1		P11234	1
Q07837	SLC31_HUMAN	Neutral and basic amino acid transport protein rBAT OS=Homo sapiens GN=SLC3A1 PE=1 SV=2 - [SLC31_HUMAN]	0	0	0	0	0	0	0	2	0	1	0	7	1	0	0	11	0	1	1		O75936	1		Q07837	1
Q9NRY6	PLS3_HUMAN	Phospholipid scramblase 3 OS=Homo sapiens GN=PLSCR3 PE=1 SV=2 - [PLS3_HUMAN]	0	0	0	0	0	0	0	1	0	2	0	0	2	0	0	5	0	1	1		P29966	1		Q9NRY6	1
Q8N392	RHG18_HUMAN	Rho GTPase-activating protein 18 OS=Homo sapiens GN=ARHGAP18 PE=1 SV=3 - [RHG18_HUMAN]	0	0	0	0	0	0	0	0	0	0	0	0	3	0	0	3	0	1	1		Q6V0I7	1		Q8N392	1
P46459	NSF_HUMAN	Vesicle-fusing ATPase OS=Homo sapiens GN=NSF PE=1 SV=3 - [NSF_HUMAN]	0	0	0	0	0	0	2	2	0	1	0	0	1	0	0	6	0	1	1		Q8WVQ1	1		P46459	1
Q9C0H2	TTYH3_HUMAN	Protein tweety homolog 3 OS=Homo sapiens GN=TTYH3 PE=1 SV=3 - [TTYH3_HUMAN]	0	0	0	0	0	0	5	1	1	5	0	8	2	0	0	22	0	1	1		P09958	1		Q9C0H2	1
O15118	NPC1_HUMAN	Niemann-Pick C1 protein OS=Homo sapiens GN=NPC1 PE=1 SV=2 - [NPC1_HUMAN]	0	0	0	0	0	0	0	0	0	2	0	0	2	0	0	4	0	1	1		Q13822	1		O15118	1
O15066	KIF3B_HUMAN	Kinesin-like protein KIF3B OS=Homo sapiens GN=KIF3B PE=1 SV=1 - [KIF3B_HUMAN]	0	0	0	0	0	0	2	1	0	0	0	0	0	0	0	3	0	1	1		Q9NQ79	1		O15066	1
Q96CF2	CHM4C_HUMAN	Charged multivesicular body protein 4c OS=Homo sapiens GN=CHMP4C PE=1 SV=1 - [CHM4C_HUMAN]	0	0	0	0	0	0	1	2	0	1	0	0	1	0	0	5	0	1	1		Q9Y3R5	1		Q96CF2	1
Q6P5W5	S39A4_HUMAN	Zinc transporter ZIP4 OS=Homo sapiens GN=SLC39A4 PE=1 SV=3 - [S39A4_HUMAN]	0	0	0	0	0	0	0	0	0	2	0	0	1	0	0	3	0	1	1		P30613	1		Q6P5W5	1
Q6IAA8	LTOR1_HUMAN	Ragulator complex protein LAMTOR1 OS=Homo sapiens GN=LAMTOR1 PE=1 SV=2 - [LTOR1_HUMAN]	0	0	0	0	0	0	1	0	1	1	0	0	2	1	0	6	0	1	1		P32754	1		Q6IAA8	1
Q6ZQN7	SO4C1_HUMAN	Solute carrier organic anion transporter family member 4C1 OS=Homo sapiens GN=SLCO4C1 PE=1 SV=1 - [SO4C1_HUMAN]	0	0	0	0	0	0	1	0	0	0	0	4	0	0	0	5	0	1	1		P35858	1		Q6ZQN7	1
Q9H0W9	CK054_HUMAN	Ester hydrolase C11orf54 OS=Homo sapiens GN=C11orf54 PE=1 SV=1 - [CK054_HUMAN]	0	0	0	0	0	0	2	2	2	1	0	1	0	1	0	9	0	1	1		P49189	1		Q9H0W9	1
P35613	BASI_HUMAN	Basigin OS=Homo sapiens GN=BSG PE=1 SV=2 - [BASI_HUMAN]	0	0	0	0	0	0	5	0	0	1	1	1	1	0	0	9	0	1	1		P05067	1		P35613	1
A0PJK1	SC5AA_HUMAN	Sodium/glucose cotransporter 5 OS=Homo sapiens GN=SLC5A10 PE=1 SV=2 - [SC5AA_HUMAN]	0	0	0	0	0	0	0	1	0	2	0	1	0	1	0	5	0	1	1		P01593	1		A0PJK1	1
Q96AM1	MRGRF_HUMAN	Mas-related G-protein coupled receptor member F OS=Homo sapiens GN=MRGPRF PE=2 SV=1 - [MRGRF_HUMAN]	0	0	0	0	0	0	0	1	0	0	0	0	2	0	0	3	0	1	1		P34913	1		Q96AM1	1
P21281	VATB2_HUMAN	V-type proton ATPase subunit B, brain isoform OS=Homo sapiens GN=ATP6V1B2 PE=1 SV=3 - [VATB2_HUMAN]	0	0	0	0	0	0	0	0	0	0	0	3	0	0	0	3	0	1	1		O00194	1		P21281	1
P05198	IF2A_HUMAN	Eukaryotic translation initiation factor 2 subunit 1 OS=Homo sapiens GN=EIF2S1 PE=1 SV=3 - [IF2A_HUMAN]	0	0	0	0	0	0	0	1	0	0	0	0	1	2	0	4	0	1	1		Q687X5	1		P05198	1
Q9UHI7	S23A1_HUMAN	Solute carrier family 23 member 1 OS=Homo sapiens GN=SLC23A1 PE=1 SV=3 - [S23A1_HUMAN]	0	0	0	0	0	0	1	1	0	1	0	2	0	0	0	5	0	1	1		P04430	1		Q9UHI7	1
Q15758	AAAT_HUMAN	Neutral amino acid transporter B(0) OS=Homo sapiens GN=SLC1A5 PE=1 SV=2 - [AAAT_HUMAN]	0	0	0	0	0	0	0	1	0	3	0	0	2	0	0	6	0	1	1		P09488	1		Q15758	1
Q00610	CLH1_HUMAN	Clathrin heavy chain 1 OS=Homo sapiens GN=CLTC PE=1 SV=5 - [CLH1_HUMAN]	0	0	0	0	0	0	0	0	0	0	0	2	0	0	0	2	0	1	1		Q92928	1		Q00610	1
Q13113	PDZ1I_HUMAN	PDZK1-interacting protein 1 OS=Homo sapiens GN=PDZK1IP1 PE=1 SV=1 - [PDZ1I_HUMAN]	0	0	0	0	0	0	3	2	0	1	1	3	1	0	0	11	0	1	1		A0M8Q6	1		Q13113	1
Q99102	MUC4_HUMAN	Mucin-4 OS=Homo sapiens GN=MUC4 PE=1 SV=4 - [MUC4_HUMAN]	0	0	0	0	0	0	1	0	0	3	0	0	0	0	0	4	0	1	1		Q8N9U0	1		Q99102	1
P17927	CR1_HUMAN	Complement receptor type 1 OS=Homo sapiens GN=CR1 PE=1 SV=3 - [CR1_HUMAN]	0	0	0	0	0	0	0	1	0	0	0	2	0	0	0	3	0	1	1		P51159	1		P17927	1
P26006	ITA3_HUMAN	Integrin alpha-3 OS=Homo sapiens GN=ITGA3 PE=1 SV=5 - [ITA3_HUMAN]	0	0	0	0	0	0	1	2	0	1	0	0	1	0	0	5	0	1	1		P07384	1		P26006	1
P54652	HSP72_HUMAN	Heat shock-related 70 kDa protein 2 OS=Homo sapiens GN=HSPA2 PE=1 SV=1 - [HSP72_HUMAN]	0	0	0	0	0	0	0	0	3	0	0	0	0	3	0	6	0	1	1		O60262	1		P54652	1
Q14767	LTBP2_HUMAN	Latent-transforming growth factor beta-binding protein 2 OS=Homo sapiens GN=LTBP2 PE=1 SV=3 - [LTBP2_HUMAN]	0	0	0	0	0	0	4	5	0	7	0	0	2	1	0	19	0	1	1		P0C0L5	1		Q14767	1
P02679	FIBG_HUMAN	Fibrinogen gamma chain OS=Homo sapiens GN=FGG PE=1 SV=3 - [FIBG_HUMAN]	0	0	0	0	0	0	0	2	0	3	0	0	0	0	0	5	0	1	1		P29622	1		P02679	1
P10643	CO7_HUMAN	Complement component C7 OS=Homo sapiens GN=C7 PE=1 SV=2 - [CO7_HUMAN]	0	0	0	0	0	0	0	1	0	0	0	2	5	8	0	16	0	1	1		Q9Y2S2	1		P10643	1
Q96QE2	MYCT_HUMAN	Proton myo-inositol cotransporter OS=Homo sapiens GN=SLC2A13 PE=1 SV=3 - [MYCT_HUMAN]	0	0	0	0	0	0	0	0	0	0	0	0	2	0	0	2	0	1	1		Q8TCD5	1		Q96QE2	1
O60637	TSN3_HUMAN	Tetraspanin-3 OS=Homo sapiens GN=TSPAN3 PE=2 SV=1 - [TSN3_HUMAN]	0	0	0	0	0	0	1	0	0	2	0	1	0	0	0	4	0	1	1		P51654	1		O60637	1
A6NIZ1	RP1BL_HUMAN	Ras-related protein Rap-1b-like protein OS=Homo sapiens PE=2 SV=1 - [RP1BL_HUMAN]	0	0	0	0	0	0	0	0	0	0	0	5	0	0	0	5	0	1	1		P15291	1		A6NIZ1	1
Q9H0U4	RAB1B_HUMAN	Ras-related protein Rab-1B OS=Homo sapiens GN=RAB1B PE=1 SV=1 - [RAB1B_HUMAN]	0	0	0	0	0	0	0	0	0	0	0	3	0	0	0	3	0	1	1		Q9UNW1	1		Q9H0U4	1
P05556	ITB1_HUMAN	Integrin beta-1 OS=Homo sapiens GN=ITGB1 PE=1 SV=2 - [ITB1_HUMAN]	0	0	0	0	0	0	3	1	0	0	0	0	2	0	0	6	0	1	1		Q16706	1		P05556	1
P04279	SEMG1_HUMAN	Semenogelin-1 OS=Homo sapiens GN=SEMG1 PE=1 SV=2 - [SEMG1_HUMAN]	0	0	0	0	0	0	0	0	0	0	0	0	10	0	0	10	0	1	1		P08185	1		P04279	1
Q02383	SEMG2_HUMAN	Semenogelin-2 OS=Homo sapiens GN=SEMG2 PE=1 SV=1 - [SEMG2_HUMAN]	0	0	0	0	0	0	0	0	0	0	0	0	14	0	0	14	0	1	1		Q15904	1		Q02383	1
Q8WW52	F151A_HUMAN	Protein FAM151A OS=Homo sapiens GN=FAM151A PE=2 SV=2 - [F151A_HUMAN]	0	0	0	0	0	0	0	2	0	0	0	0	0	0	0	2	0	1	1		P39059	1		Q8WW52	1
Q96LD4	TRI47_HUMAN	Tripartite motif-containing protein 47 OS=Homo sapiens GN=TRIM47 PE=1 SV=2 - [TRI47_HUMAN]	0	0	0	0	0	0	4	2	0	0	0	2	0	0	0	8	0	1	1		Q92520	1		Q96LD4	1
Q8TCC7	S22A8_HUMAN	Solute carrier family 22 member 8 OS=Homo sapiens GN=SLC22A8 PE=1 SV=1 - [S22A8_HUMAN]	0	0	0	0	0	0	2	1	0	0	0	1	0	0	0	4	0	1	1		Q96DG6	1		Q8TCC7	1
P02743	SAMP_HUMAN	Serum amyloid P-component OS=Homo sapiens GN=APCS PE=1 SV=2 - [SAMP_HUMAN]	0	0	0	0	0	0	2	4	4	1	0	0	0	0	0	11	0	1	1		P10768	1		P02743	1
P02538	K2C6A_HUMAN	Keratin, type II cytoskeletal 6A OS=Homo sapiens GN=KRT6A PE=1 SV=3 - [K2C6A_HUMAN]	0	0	0	0	0	0	0	0	0	0	4	0	1	2	0	7	0	1	1		P63267	1		P02538	1
Q14914	PTGR1_HUMAN	Prostaglandin reductase 1 OS=Homo sapiens GN=PTGR1 PE=1 SV=2 - [PTGR1_HUMAN]	0	0	0	0	0	0	0	0	0	0	0	3	0	0	0	3	0	1	1		P24298	1		Q14914	1
Q9Y5K8	VATD_HUMAN	V-type proton ATPase subunit D OS=Homo sapiens GN=ATP6V1D PE=1 SV=1 - [VATD_HUMAN]	0	0	0	0	0	0	0	1	0	0	0	3	1	0	0	5	0	1	1		O43155	1		Q9Y5K8	1
P47929	LEG7_HUMAN	Galectin-7 OS=Homo sapiens GN=LGALS7 PE=1 SV=2 - [LEG7_HUMAN]	0	0	0	0	0	0	0	0	0	0	0	0	0	3	0	3	0	1	1		Q9UKM7	1		P47929	1
O76076	WISP2_HUMAN	WNT1-inducible-signaling pathway protein 2 OS=Homo sapiens GN=WISP2 PE=1 SV=1 - [WISP2_HUMAN]	0	0	0	0	0	0	0	0	0	0	2	0	1	1	0	4	0	1	1		Q6P9A2	1		O76076	1
P01344	IGF2_HUMAN	Insulin-like growth factor II OS=Homo sapiens GN=IGF2 PE=1 SV=1 - [IGF2_HUMAN]	0	0	0	0	0	0	1	1	0	2	0	0	0	0	0	4	0	1	1		P00439	1		P01344	1
Q9ULI3	HEG1_HUMAN	Protein HEG homolog 1 OS=Homo sapiens GN=HEG1 PE=1 SV=3 - [HEG1_HUMAN]	0	0	0	0	0	0	0	0	0	0	0	0	5	0	0	5	0	1	1		P01768	1		Q9ULI3	1
Q14764	MVP_HUMAN	Major vault protein OS=Homo sapiens GN=MVP PE=1 SV=4 - [MVP_HUMAN]	0	0	0	0	0	0	0	0	0	0	0	0	0	4	0	4	0	1	1		P49862	1		Q14764	1
P05362	ICAM1_HUMAN	Intercellular adhesion molecule 1 OS=Homo sapiens GN=ICAM1 PE=1 SV=2 - [ICAM1_HUMAN]	0	0	0	0	0	0	0	0	0	0	0	0	2	0	0	2	0	1	1		Q9UKU9	1		P05362	1
P09603	CSF1_HUMAN	Macrophage colony-stimulating factor 1 OS=Homo sapiens GN=CSF1 PE=1 SV=2 - [CSF1_HUMAN]	0	0	0	0	0	0	1	0	0	0	2	0	1	1	0	5	0	1	1		P32926	1		P09603	1
Q8NBJ4	GOLM1_HUMAN	Golgi membrane protein 1 OS=Homo sapiens GN=GOLM1 PE=1 SV=1 - [GOLM1_HUMAN]	0	0	0	0	0	0	0	0	0	0	1	0	2	1	0	4	0	1	1		Q9NY97	1		Q8NBJ4	1
P24821	TENA_HUMAN	Tenascin OS=Homo sapiens GN=TNC PE=1 SV=3 - [TENA_HUMAN]	0	0	0	0	0	0	0	2	0	0	0	0	2	0	0	4	0	1	1		P02652	1		P24821	1
P08138	TNR16_HUMAN	Tumor necrosis factor receptor superfamily member 16 OS=Homo sapiens GN=NGFR PE=1 SV=1 - [TNR16_HUMAN]	0	0	0	0	0	0	1	0	0	0	0	0	5	1	0	7	0	1	1		P52823	1		P08138	1
P53634	CATC_HUMAN	Dipeptidyl peptidase 1 OS=Homo sapiens GN=CTSC PE=1 SV=2 - [CATC_HUMAN]	0	0	0	0	0	0	4	4	3	5	4	4	2	3	0	29	0	1	1		P02765	1		P53634	1
Q7L5L3	GDPD3_HUMAN	Glycerophosphodiester phosphodiesterase domain-containing protein 3 OS=Homo sapiens GN=GDPD3 PE=2 SV=3 - [GDPD3_HUMAN]	0	0	0	0	0	0	2	3	0	3	0	2	1	3	0	14	0	1	1		P23284	1		Q7L5L3	1
P17096	HMGA1_HUMAN	High mobility group protein HMG-I/HMG-Y OS=Homo sapiens GN=HMGA1 PE=1 SV=3 - [HMGA1_HUMAN]	0	0	0	0	0	0	0	3	0	0	0	0	0	0	0	3	0	1	1		O75487	1		P17096	1
P07148	FABPL_HUMAN	Fatty acid-binding protein, liver OS=Homo sapiens GN=FABP1 PE=1 SV=1 - [FABPL_HUMAN]	0	0	0	0	0	0	0	2	0	0	0	4	0	0	0	6	0	1	1		Q16832	1		P07148	1
A8MUH7	PDZ1P_HUMAN	Putative PDZ domain-containing protein 1P OS=Homo sapiens GN=PDZK1P1 PE=5 SV=2 - [PDZ1P_HUMAN]	0	0	0	0	0	0	0	2	0	0	0	0	1	1	0	4	0	1	1		P05120	1		A8MUH7	1
Q8NHP8	PLBL2_HUMAN	Putative phospholipase B-like 2 OS=Homo sapiens GN=PLBD2 PE=1 SV=2 - [PLBL2_HUMAN]	0	0	0	0	0	0	2	3	0	2	1	0	0	0	0	8	0	1	1		P52758	1		Q8NHP8	1
O00337	S28A1_HUMAN	Sodium/nucleoside cotransporter 1 OS=Homo sapiens GN=SLC28A1 PE=1 SV=2 - [S28A1_HUMAN]	0	0	0	0	0	0	2	1	0	0	0	1	0	0	0	4	0	1	1		P13797	1		O00337	1
Q92692	PVRL2_HUMAN	Nectin-2 OS=Homo sapiens GN=PVRL2 PE=1 SV=1 - [PVRL2_HUMAN]	0	0	0	0	0	0	0	2	0	0	0	0	0	0	0	2	0	1	1		P46782	1		Q92692	1
P54793	ARSF_HUMAN	Arylsulfatase F OS=Homo sapiens GN=ARSF PE=1 SV=4 - [ARSF_HUMAN]	0	0	0	0	0	0	0	2	1	2	0	0	0	0	0	5	0	1	1		Q02809	1		P54793	1
P54753	EPHB3_HUMAN	Ephrin type-B receptor 3 OS=Homo sapiens GN=EPHB3 PE=1 SV=2 - [EPHB3_HUMAN]	0	0	0	0	0	0	0	2	0	0	0	0	0	0	0	2	0	1	1		Q99574	1		P54753	1
P55287	CAD11_HUMAN	Cadherin-11 OS=Homo sapiens GN=CDH11 PE=1 SV=2 - [CAD11_HUMAN]	0	0	0	0	0	0	3	1	1	1	0	0	0	0	0	6	0	1	1		P06280	1		P55287	1
P07686	HEXB_HUMAN	Beta-hexosaminidase subunit beta OS=Homo sapiens GN=HEXB PE=1 SV=3 - [HEXB_HUMAN]	0	0	0	0	0	0	0	1	0	1	2	0	0	0	0	4	0	1	1		P22352	1		P07686	1
O95497	VNN1_HUMAN	Pantetheinase OS=Homo sapiens GN=VNN1 PE=1 SV=2 - [VNN1_HUMAN]	0	0	0	0	0	0	0	0	0	0	0	3	0	0	0	3	0	1	1		Q96BW5	1		O95497	1
Q9Y696	CLIC4_HUMAN	Chloride intracellular channel protein 4 OS=Homo sapiens GN=CLIC4 PE=1 SV=4 - [CLIC4_HUMAN]	0	0	0	0	0	0	0	0	0	0	0	6	0	0	0	6	0	1	1		Q96KK5	1		Q9Y696	1
Q9UBV8	PEF1_HUMAN	Peflin OS=Homo sapiens GN=PEF1 PE=1 SV=1 - [PEF1_HUMAN]	0	0	0	0	0	0	0	0	0	0	0	4	0	0	0	4	0	1	1		Q8TDQ7	1		Q9UBV8	1
P09327	VILI_HUMAN	Villin-1 OS=Homo sapiens GN=VIL1 PE=1 SV=4 - [VILI_HUMAN]	0	0	0	0	0	0	0	0	0	0	0	3	0	0	0	3	0	1	1		P14625	1		P09327	1
P19652	A1AG2_HUMAN	Alpha-1-acid glycoprotein 2 OS=Homo sapiens GN=ORM2 PE=1 SV=2 - [A1AG2_HUMAN]	0	0	0	0	0	0	0	0	0	0	4	3	0	0	0	7	0	1	1		O75503	1		P19652	1
P68366	TBA4A_HUMAN	Tubulin alpha-4A chain OS=Homo sapiens GN=TUBA4A PE=1 SV=1 - [TBA4A_HUMAN]	0	0	0	0	0	0	0	0	0	0	0	4	0	0	0	4	0	1	1		P15531	1		P68366	1
P11216	PYGB_HUMAN	Glycogen phosphorylase, brain form OS=Homo sapiens GN=PYGB PE=1 SV=5 - [PYGB_HUMAN]	0	0	0	0	0	0	0	0	0	0	0	2	0	2	0	4	0	1	1		Q9UEF7	1		P11216	1
O15243	OBRG_HUMAN	Leptin receptor gene-related protein OS=Homo sapiens GN=LEPROT PE=1 SV=1 - [OBRG_HUMAN]	0	0	0	0	0	0	0	0	0	0	0	2	0	0	0	2	0	1	1		Q9H2A2	1		O15243	1
P02792	FRIL_HUMAN	Ferritin light chain OS=Homo sapiens GN=FTL PE=1 SV=2 - [FRIL_HUMAN]	0	0	0	0	0	0	0	0	0	0	0	4	0	0	0	4	0	1	1		P00736	1		P02792	1
P43686	PRS6B_HUMAN	26S protease regulatory subunit 6B OS=Homo sapiens GN=PSMC4 PE=1 SV=2 - [PRS6B_HUMAN]	0	0	0	0	0	0	0	0	0	0	0	3	0	0	0	3	0	1	1		Q8NI99	1		P43686	1
P36873	PP1G_HUMAN	Serine/threonine-protein phosphatase PP1-gamma catalytic subunit OS=Homo sapiens GN=PPP1CC PE=1 SV=1 - [PP1G_HUMAN]	0	0	0	0	0	0	0	0	0	0	0	2	0	0	0	2	0	1	1		P35606	1		P36873	1
P13866	SC5A1_HUMAN	Sodium/glucose cotransporter 1 OS=Homo sapiens GN=SLC5A1 PE=1 SV=1 - [SC5A1_HUMAN]	0	0	0	0	0	0	0	0	0	0	1	2	0	1	0	4	0	1	1		Q14118	1		P13866	1
Q3YBM2	T176B_HUMAN	Transmembrane protein 176B OS=Homo sapiens GN=TMEM176B PE=2 SV=2 - [T176B_HUMAN]	0	0	0	0	0	0	0	0	0	2	0	2	1	0	0	5	0	1	1		P08697	1		Q3YBM2	1
Q9HBJ8	TMM27_HUMAN	Collectrin OS=Homo sapiens GN=TMEM27 PE=1 SV=1 - [TMM27_HUMAN]	0	0	0	0	0	0	0	0	0	0	0	2	0	0	0	2	0	1	1		P58499	1		Q9HBJ8	1
Q02413	DSG1_HUMAN	Desmoglein-1 OS=Homo sapiens GN=DSG1 PE=1 SV=2 - [DSG1_HUMAN]	0	0	0	0	0	0	0	0	0	0	0	4	0	0	0	4	0	1	1		O15230	1		Q02413	1
P61006	RAB8A_HUMAN	Ras-related protein Rab-8A OS=Homo sapiens GN=RAB8A PE=1 SV=1 - [RAB8A_HUMAN]	0	0	0	0	0	0	0	0	0	0	0	2	0	0	0	2	0	1	1		P20138	1		P61006	1
Q6PHR2	ULK3_HUMAN	Serine/threonine-protein kinase ULK3 OS=Homo sapiens GN=ULK3 PE=1 SV=2 - [ULK3_HUMAN]	0	0	0	0	0	0	0	0	0	0	0	2	0	0	0	2	0	1	1		O00533	1		Q6PHR2	1
P02511	CRYAB_HUMAN	Alpha-crystallin B chain OS=Homo sapiens GN=CRYAB PE=1 SV=2 - [CRYAB_HUMAN]	0	0	0	0	0	0	0	0	0	0	0	2	0	0	0	2	0	1	1		Q8WZ42	1		P02511	1
P11586	C1TC_HUMAN	C-1-tetrahydrofolate synthase, cytoplasmic OS=Homo sapiens GN=MTHFD1 PE=1 SV=3 - [C1TC_HUMAN]	0	0	0	0	0	0	0	0	0	0	0	2	0	0	0	2	0	1	1		Q8IYJ1	1		P11586	1
O15144	ARPC2_HUMAN	Actin-related protein 2/3 complex subunit 2 OS=Homo sapiens GN=ARPC2 PE=1 SV=1 - [ARPC2_HUMAN]	0	0	0	0	0	0	0	0	0	0	0	3	0	0	0	3	0	1	1		P46778	1		O15144	1
P35998	PRS7_HUMAN	26S protease regulatory subunit 7 OS=Homo sapiens GN=PSMC2 PE=1 SV=3 - [PRS7_HUMAN]	0	0	0	0	0	0	0	0	0	0	0	2	0	0	0	2	0	1	1		P62263	1		P35998	1
Q8N474	SFRP1_HUMAN	Secreted frizzled-related protein 1 OS=Homo sapiens GN=SFRP1 PE=1 SV=1 - [SFRP1_HUMAN]	0	0	0	0	0	0	0	0	0	0	0	2	0	0	0	2	0	1	1		P07910	1		Q8N474	1
Q4U2R8	S22A6_HUMAN	Solute carrier family 22 member 6 OS=Homo sapiens GN=SLC22A6 PE=1 SV=1 - [S22A6_HUMAN]	0	0	0	0	0	0	1	0	0	0	0	2	0	0	0	3	0	1	1		Q9Y6R7	0		Q4U2R8	1
P12814	ACTN1_HUMAN	Alpha-actinin-1 OS=Homo sapiens GN=ACTN1 PE=1 SV=2 - [ACTN1_HUMAN]	0	0	0	0	0	0	0	0	0	0	0	2	0	0	0	2	0	1	1		P05164	0		P12814	1
Q99828	CIB1_HUMAN	Calcium and integrin-binding protein 1 OS=Homo sapiens GN=CIB1 PE=1 SV=4 - [CIB1_HUMAN]	0	0	0	0	0	0	0	0	0	0	0	2	0	0	0	2	0	1	1		P13164	0		Q99828	1
O75348	VATG1_HUMAN	V-type proton ATPase subunit G 1 OS=Homo sapiens GN=ATP6V1G1 PE=1 SV=3 - [VATG1_HUMAN]	0	0	0	0	0	0	0	0	0	2	0	3	0	0	0	5	0	1	1		P20160	0		O75348	1
P60660	MYL6_HUMAN	Myosin light polypeptide 6 OS=Homo sapiens GN=MYL6 PE=1 SV=2 - [MYL6_HUMAN]	0	0	0	0	0	0	0	0	0	0	0	2	0	3	0	5	0	1	1		Q15833	0		P60660	1
O43583	DENR_HUMAN	Density-regulated protein OS=Homo sapiens GN=DENR PE=1 SV=2 - [DENR_HUMAN]	0	0	0	0	0	0	0	0	0	0	0	2	0	0	0	2	0	1	1		Q96NY8	0		O43583	1
P18827	SDC1_HUMAN	Syndecan-1 OS=Homo sapiens GN=SDC1 PE=1 SV=3 - [SDC1_HUMAN]	0	0	0	0	0	0	0	0	0	0	0	2	0	0	0	2	0	1	1		Q9H2K8	0		P18827	1
O15145	ARPC3_HUMAN	Actin-related protein 2/3 complex subunit 3 OS=Homo sapiens GN=ARPC3 PE=1 SV=3 - [ARPC3_HUMAN]	0	0	0	0	0	0	0	0	0	0	0	2	0	0	0	2	0	1	1		P61586	0		O15145	1
Q16348	S15A2_HUMAN	Solute carrier family 15 member 2 OS=Homo sapiens GN=SLC15A2 PE=2 SV=2 - [S15A2_HUMAN]	0	0	0	0	0	0	0	0	0	0	0	2	0	0	0	2	0	1	1		P01891	0		Q16348	1
Q04756	HGFA_HUMAN	Hepatocyte growth factor activator OS=Homo sapiens GN=HGFAC PE=1 SV=1 - [HGFA_HUMAN]	0	0	0	0	0	0	3	0	0	3	0	0	0	0	0	6	0	1	1		Q9UBP0	0		Q04756	1
O15374	MOT5_HUMAN	Monocarboxylate transporter 5 OS=Homo sapiens GN=SLC16A4 PE=2 SV=1 - [MOT5_HUMAN]	0	0	0	0	0	0	2	0	0	0	0	0	0	0	0	2	0	1	1		Q13443	0		O15374	1
Q9H6X2	ANTR1_HUMAN	Anthrax toxin receptor 1 OS=Homo sapiens GN=ANTXR1 PE=1 SV=2 - [ANTR1_HUMAN]	0	0	0	0	0	0	2	0	0	0	0	0	0	0	0	2	0	1	1		Q96FL8	0		Q9H6X2	1
P00995	ISK1_HUMAN	Pancreatic secretory trypsin inhibitor OS=Homo sapiens GN=SPINK1 PE=1 SV=2 - [ISK1_HUMAN]	0	0	0	0	0	0	2	0	0	0	0	0	2	0	0	4	0	1	1		P11234	0		P00995	1
Q9H2V7	SPNS1_HUMAN	Protein spinster homolog 1 OS=Homo sapiens GN=SPNS1 PE=1 SV=1 - [SPNS1_HUMAN]	0	0	0	0	0	0	0	0	0	1	0	0	2	0	0	3	0	1	1		Q07837	0		Q9H2V7	1
P08246	ELNE_HUMAN	Neutrophil elastase OS=Homo sapiens GN=ELANE PE=1 SV=1 - [ELNE_HUMAN]	0	0	0	0	0	0	0	0	2	0	0	0	0	0	0	2	0	1	1		Q9NRY6	0		P08246	1
P16035	TIMP2_HUMAN	Metalloproteinase inhibitor 2 OS=Homo sapiens GN=TIMP2 PE=1 SV=2 - [TIMP2_HUMAN]	0	0	0	0	0	0	0	0	0	0	0	0	2	0	0	2	0	1	1		Q8N392	0		P16035	1
Q99715	COCA1_HUMAN	Collagen alpha-1(XII) chain OS=Homo sapiens GN=COL12A1 PE=1 SV=2 - [COCA1_HUMAN]	0	0	0	0	0	0	0	0	0	0	0	0	2	0	0	2	0	1	1		P46459	0		Q99715	1
P08779	K1C16_HUMAN	Keratin, type I cytoskeletal 16 OS=Homo sapiens GN=KRT16 PE=1 SV=4 - [K1C16_HUMAN]	0	0	0	0	0	0	0	0	0	0	3	0	1	2	0	6	0	1	1		Q9C0H2	0		P08779	1
Q9NPF0	CD320_HUMAN	CD320 antigen OS=Homo sapiens GN=CD320 PE=1 SV=1 - [CD320_HUMAN]	0	0	0	0	0	0	0	0	0	0	0	0	2	0	0	2	0	1	1		O15118	0		Q9NPF0	1
P19971	TYPH_HUMAN	Thymidine phosphorylase OS=Homo sapiens GN=TYMP PE=1 SV=2 - [TYPH_HUMAN]	0	0	0	0	0	0	0	0	0	0	0	0	0	9	0	9	0	1	1		O15066	0		P19971	1
P23381	SYWC_HUMAN	Tryptophan--tRNA ligase, cytoplasmic OS=Homo sapiens GN=WARS PE=1 SV=2 - [SYWC_HUMAN]	0	0	0	0	0	0	0	0	0	0	0	0	0	3	0	3	0	1	1		Q96CF2	0		P23381	1
P41091	IF2G_HUMAN	Eukaryotic translation initiation factor 2 subunit 3 OS=Homo sapiens GN=EIF2S3 PE=1 SV=3 - [IF2G_HUMAN]	0	0	0	0	0	0	0	0	0	0	0	0	0	3	0	3	0	1	1		Q6P5W5	0		P41091	1
O95274	LYPD3_HUMAN	Ly6/PLAUR domain-containing protein 3 OS=Homo sapiens GN=LYPD3 PE=1 SV=2 - [LYPD3_HUMAN]	0	0	0	0	0	0	0	0	0	0	0	0	0	2	0	2	0	1	1		Q6IAA8	0		O95274	1
P07237	PDIA1_HUMAN	Protein disulfide-isomerase OS=Homo sapiens GN=P4HB PE=1 SV=3 - [PDIA1_HUMAN]	0	0	0	0	0	0	0	0	0	0	0	0	0	3	0	3	0	1	1		Q6ZQN7	0		P07237	1
P22531	SPR2E_HUMAN	Small proline-rich protein 2E OS=Homo sapiens GN=SPRR2E PE=2 SV=2 - [SPR2E_HUMAN]	0	0	0	0	0	0	0	0	0	0	0	0	0	5	0	5	0	1	1		Q9H0W9	0		P22531	1
P35325	SPR2B_HUMAN	Small proline-rich protein 2B OS=Homo sapiens GN=SPRR2B PE=2 SV=1 - [SPR2B_HUMAN]	0	0	0	0	0	0	0	0	0	0	0	0	0	4	0	4	0	1	1		P35613	0		P35325	1
P31153	METK2_HUMAN	S-adenosylmethionine synthase isoform type-2 OS=Homo sapiens GN=MAT2A PE=1 SV=1 - [METK2_HUMAN]	0	0	0	0	0	0	0	0	0	0	0	0	0	2	0	2	0	1	1		A0PJK1	0		P31153	1
P19105	ML12A_HUMAN	Myosin regulatory light chain 12A OS=Homo sapiens GN=MYL12A PE=1 SV=2 - [ML12A_HUMAN]	0	0	0	0	0	0	0	0	0	0	0	0	0	2	0	2	0	1	1		Q96AM1	0		P19105	1
P18206	VINC_HUMAN	Vinculin OS=Homo sapiens GN=VCL PE=1 SV=4 - [VINC_HUMAN]	0	0	0	0	0	0	0	0	0	0	0	0	0	2	0	2	0	1	1		P21281	0		P18206	1
P19367	HXK1_HUMAN	Hexokinase-1 OS=Homo sapiens GN=HK1 PE=1 SV=3 - [HXK1_HUMAN]	0	0	0	0	0	0	0	0	0	0	0	0	0	2	0	2	0	1	1		P05198	0		P19367	1
P29144	TPP2_HUMAN	Tripeptidyl-peptidase 2 OS=Homo sapiens GN=TPP2 PE=1 SV=4 - [TPP2_HUMAN]	0	0	0	0	0	0	0	0	0	0	0	0	0	2	0	2	0	1	1		Q9UHI7	0		P29144	1
P62906	RL10A_HUMAN	60S ribosomal protein L10a OS=Homo sapiens GN=RPL10A PE=1 SV=2 - [RL10A_HUMAN]	0	0	0	0	0	0	0	0	0	0	0	0	0	2	0	2	0	1	1		Q15758	0		P62906	1
Q99798	ACON_HUMAN	Aconitate hydratase, mitochondrial OS=Homo sapiens GN=ACO2 PE=1 SV=2 - [ACON_HUMAN]	0	0	0	0	0	0	0	0	0	0	0	0	0	3	0	3	0	1	1		Q00610	0		Q99798	1
P10809	CH60_HUMAN	60 kDa heat shock protein, mitochondrial OS=Homo sapiens GN=HSPD1 PE=1 SV=2 - [CH60_HUMAN]	0	0	0	0	0	0	0	0	0	0	0	0	0	2	0	2	0	1	1		Q13113	0		P10809	1
Q96RM1	SPR2F_HUMAN	Small proline-rich protein 2F OS=Homo sapiens GN=SPRR2F PE=2 SV=1 - [SPR2F_HUMAN]	0	0	0	0	0	0	0	0	0	0	0	0	0	4	0	4	0	1	1		Q99102	0		Q96RM1	1
O95782	AP2A1_HUMAN	AP-2 complex subunit alpha-1 OS=Homo sapiens GN=AP2A1 PE=1 SV=3 - [AP2A1_HUMAN]	0	0	0	0	0	0	0	0	0	0	0	0	0	2	0	2	0	1	1		P17927	0		O95782	1
O94973	AP2A2_HUMAN	AP-2 complex subunit alpha-2 OS=Homo sapiens GN=AP2A2 PE=1 SV=2 - [AP2A2_HUMAN]	0	0	0	0	0	0	0	0	0	0	0	0	0	2	0	2	0	1	1		P26006	0		O94973	1
P01609	KV117_HUMAN	Ig kappa chain V-I region Scw OS=Homo sapiens PE=1 SV=1 - [KV117_HUMAN]	0	0	0	0	0	0	0	0	0	0	7	0	0	0	0	7	0	1	1		P54652	0		P01609	1
P01598	KV106_HUMAN	Ig kappa chain V-I region EU OS=Homo sapiens PE=1 SV=1 - [KV106_HUMAN]	0	0	0	0	0	0	0	0	0	0	4	0	0	0	0	4	0	1	1		Q14767	0		P01598	1
Q01459	DIAC_HUMAN	Di-N-acetylchitobiase OS=Homo sapiens GN=CTBS PE=1 SV=1 - [DIAC_HUMAN]	0	0	0	0	0	0	0	0	0	0	3	0	0	0	0	3	0	1	1		P02679	0		Q01459	1
Q02747	GUC2A_HUMAN	Guanylin OS=Homo sapiens GN=GUCA2A PE=1 SV=2 - [GUC2A_HUMAN]	0	0	0	0	0	0	0	0	0	0	3	0	0	0	0	3	0	1	1		P10643	0		Q02747	1
P01764	HV303_HUMAN	Ig heavy chain V-III region VH26 OS=Homo sapiens PE=1 SV=1 - [HV303_HUMAN]	0	0	0	0	0	0	0	0	0	0	2	0	0	0	0	2	0	1	1		Q96QE2	0		P01764	1
Q9Y5Y7	LYVE1_HUMAN	Lymphatic vessel endothelial hyaluronic acid receptor 1 OS=Homo sapiens GN=LYVE1 PE=1 SV=2 - [LYVE1_HUMAN]	0	0	0	0	0	0	0	0	0	0	2	0	0	0	0	2	0	1	1		O60637	0		Q9Y5Y7	1
P01777	HV316_HUMAN	Ig heavy chain V-III region TEI OS=Homo sapiens PE=1 SV=1 - [HV316_HUMAN]	2	0	2	2	0	6	0	0	0	0	0	0	0	0	12	0	1	0	1		A6NIZ1	0		P01777	0
P04259	K2C6B_HUMAN	Keratin, type II cytoskeletal 6B OS=Homo sapiens GN=KRT6B PE=1 SV=5 - [K2C6B_HUMAN]	5	0	2	0	0	0	0	0	0	0	0	0	0	0	7	0	1	0	1		Q9H0U4	0		P04259	0
P13646	K1C13_HUMAN	Keratin, type I cytoskeletal 13 OS=Homo sapiens GN=KRT13 PE=1 SV=4 - [K1C13_HUMAN]	7	0	0	1	0	0	0	0	0	0	0	0	0	0	8	0	1	0	1		P05556	0		P13646	0
Q96P63	SPB12_HUMAN	Serpin B12 OS=Homo sapiens GN=SERPINB12 PE=1 SV=1 - [SPB12_HUMAN]	0	6	0	0	0	0	0	0	0	0	0	0	0	0	6	0	1	0	1		P04279	0		Q96P63	0
P36871	PGM1_HUMAN	Phosphoglucomutase-1 OS=Homo sapiens GN=PGM1 PE=1 SV=3 - [PGM1_HUMAN]	0	3	0	1	0	0	0	0	0	0	0	0	0	0	4	0	1	0	1		Q02383	0		P36871	0
P68371	TBB4B_HUMAN	Tubulin beta-4B chain OS=Homo sapiens GN=TUBB4B PE=1 SV=1 - [TBB4B_HUMAN]	0	0	8	0	0	8	0	0	0	0	0	0	0	0	16	0	1	0	1		Q8WW52	0		P68371	0
P61981	1433G_HUMAN	14-3-3 protein gamma OS=Homo sapiens GN=YWHAG PE=1 SV=2 - [1433G_HUMAN]	3	5	0	0	0	0	0	0	0	0	0	0	0	0	8	0	1	0	1		Q96LD4	0		P61981	0
Q9Y6W5	WASF2_HUMAN	Wiskott-Aldrich syndrome protein family member 2 OS=Homo sapiens GN=WASF2 PE=1 SV=3 - [WASF2_HUMAN]	0	0	2	0	0	0	0	0	0	0	0	0	0	0	2	0	1	0	1		Q8TCC7	0		Q9Y6W5	0
P62070	RRAS2_HUMAN	Ras-related protein R-Ras2 OS=Homo sapiens GN=RRAS2 PE=1 SV=1 - [RRAS2_HUMAN]	1	0	0	0	2	0	0	0	0	0	0	0	0	0	3	0	1	0	1		P02743	0		P62070	0
P12955	PEPD_HUMAN	Xaa-Pro dipeptidase OS=Homo sapiens GN=PEPD PE=1 SV=3 - [PEPD_HUMAN]	0	2	0	2	0	0	0	0	0	0	0	0	0	0	4	0	1	0	1		P02538	0		P12955	0
O43505	B4GA1_HUMAN	N-acetyllactosaminide beta-1,3-N-acetylglucosaminyltransferase OS=Homo sapiens GN=B3GNT1 PE=1 SV=1 - [B3GN1_HUMAN]	0	5	0	0	1	0	0	0	0	0	0	0	0	0	6	0	1	0	1		Q14914	0		O43505	0
Q9H2M3	BHMT2_HUMAN	S-methylmethionine--homocysteine S-methyltransferase BHMT2 OS=Homo sapiens GN=BHMT2 PE=1 SV=1 - [BHMT2_HUMAN]	0	2	0	0	0	0	0	0	0	0	0	0	0	0	2	0	1	0	1		Q9Y5K8	0		Q9H2M3	0
O43657	TSN6_HUMAN	Tetraspanin-6 OS=Homo sapiens GN=TSPAN6 PE=1 SV=1 - [TSN6_HUMAN]	0	0	0	0	0	2	0	0	0	0	0	0	0	0	2	0	1	0	1		P47929	0		O43657	0
O75936	BODG_HUMAN	Gamma-butyrobetaine dioxygenase OS=Homo sapiens GN=BBOX1 PE=1 SV=1 - [BODG_HUMAN]	0	3	0	0	0	0	0	0	0	0	0	0	0	0	3	0	1	0	1		O76076	0		O75936	0
P29966	MARCS_HUMAN	Myristoylated alanine-rich C-kinase substrate OS=Homo sapiens GN=MARCKS PE=1 SV=4 - [MARCS_HUMAN]	4	0	0	0	0	0	0	0	0	0	0	0	0	0	4	0	1	0	1		P01344	0		P29966	0
Q6V0I7	FAT4_HUMAN	Protocadherin Fat 4 OS=Homo sapiens GN=FAT4 PE=1 SV=2 - [FAT4_HUMAN]	0	5	0	1	0	0	0	0	0	0	0	0	0	0	6	0	1	0	1		Q9ULI3	0		Q6V0I7	0
Q8WVQ1	CANT1_HUMAN	Soluble calcium-activated nucleotidase 1 OS=Homo sapiens GN=CANT1 PE=1 SV=1 - [CANT1_HUMAN]	0	2	0	1	0	0	0	0	0	0	0	0	0	0	3	0	1	0	1		Q14764	0		Q8WVQ1	0
P09958	FURIN_HUMAN	Furin OS=Homo sapiens GN=FURIN PE=1 SV=2 - [FURIN_HUMAN]	0	0	0	2	0	0	0	0	0	0	0	0	0	0	2	0	1	0	1		P05362	0		P09958	0
Q13822	ENPP2_HUMAN	Ectonucleotide pyrophosphatase/phosphodiesterase family member 2 OS=Homo sapiens GN=ENPP2 PE=1 SV=3 - [ENPP2_HUMAN]	0	4	0	2	0	0	0	0	0	0	0	0	0	0	6	0	1	0	1		P09603	0		Q13822	0
Q9NQ79	CRAC1_HUMAN	Cartilage acidic protein 1 OS=Homo sapiens GN=CRTAC1 PE=1 SV=2 - [CRAC1_HUMAN]	0	2	0	0	0	0	0	0	0	0	0	0	0	0	2	0	1	0	1		Q8NBJ4	0		Q9NQ79	0
Q9Y3R5	DOP2_HUMAN	Protein dopey-2 OS=Homo sapiens GN=DOPEY2 PE=1 SV=5 - [DOP2_HUMAN]	0	0	0	0	0	3	0	0	0	0	0	0	0	0	3	0	1	0	1		P24821	0		Q9Y3R5	0
P30613	KPYR_HUMAN	Pyruvate kinase PKLR OS=Homo sapiens GN=PKLR PE=1 SV=2 - [KPYR_HUMAN]	0	4	0	2	0	0	0	0	0	0	0	0	0	0	6	0	1	0	1		P08138	0		P30613	0
P32754	HPPD_HUMAN	4-hydroxyphenylpyruvate dioxygenase OS=Homo sapiens GN=HPD PE=1 SV=2 - [HPPD_HUMAN]	0	5	0	0	0	0	0	0	0	0	0	0	0	0	5	0	1	0	1		P53634	0		P32754	0
P35858	ALS_HUMAN	Insulin-like growth factor-binding protein complex acid labile subunit OS=Homo sapiens GN=IGFALS PE=1 SV=1 - [ALS_HUMAN]	0	3	0	1	0	0	0	0	0	0	0	0	0	0	4	0	1	0	1		Q7L5L3	0		P35858	0
P49189	AL9A1_HUMAN	4-trimethylaminobutyraldehyde dehydrogenase OS=Homo sapiens GN=ALDH9A1 PE=1 SV=3 - [AL9A1_HUMAN]	0	6	0	0	0	0	0	0	0	0	0	0	0	0	6	0	1	0	1		P17096	0		P49189	0
P05067	A4_HUMAN	Amyloid beta A4 protein OS=Homo sapiens GN=APP PE=1 SV=3 - [A4_HUMAN]	0	0	0	2	0	0	0	0	0	0	0	0	0	0	2	0	1	0	1		P07148	0		P05067	0
P01593	KV101_HUMAN	Ig kappa chain V-I region AG OS=Homo sapiens PE=1 SV=1 - [KV101_HUMAN]	0	6	0	0	0	7	0	0	0	0	0	0	0	0	13	0	1	0	1		A8MUH7	0		P01593	0
P34913	HYES_HUMAN	Bifunctional epoxide hydrolase 2 OS=Homo sapiens GN=EPHX2 PE=1 SV=2 - [HYES_HUMAN]	0	3	0	0	0	3	0	0	0	0	0	0	0	0	6	0	1	0	1		Q8NHP8	0		P34913	0
O00194	RB27B_HUMAN	Ras-related protein Rab-27B OS=Homo sapiens GN=RAB27B PE=1 SV=4 - [RB27B_HUMAN]	0	0	0	0	0	3	0	0	0	0	0	0	0	0	3	0	1	0	1		O00337	0		O00194	0
Q687X5	STEA4_HUMAN	Metalloreductase STEAP4 OS=Homo sapiens GN=STEAP4 PE=1 SV=1 - [STEA4_HUMAN]	0	0	0	0	0	2	0	0	0	0	0	0	0	0	2	0	1	0	1		Q92692	0		Q687X5	0
P04430	KV122_HUMAN	Ig kappa chain V-I region BAN OS=Homo sapiens PE=1 SV=1 - [KV122_HUMAN]	0	0	0	0	0	2	0	0	0	0	0	0	0	0	2	0	1	0	1		P54793	0		P04430	0
P09488	GSTM1_HUMAN	Glutathione S-transferase Mu 1 OS=Homo sapiens GN=GSTM1 PE=1 SV=3 - [GSTM1_HUMAN]	0	0	0	0	0	3	0	0	0	0	0	0	0	0	3	0	1	0	1		P54753	0		P09488	0
Q92928	RAB1C_HUMAN	Putative Ras-related protein Rab-1C OS=Homo sapiens GN=RAB1C PE=5 SV=2 - [RAB1C_HUMAN]	0	0	0	0	0	3	0	0	0	0	0	0	0	0	3	0	1	0	1		P55287	0		Q92928	0
A0M8Q6	LAC7_HUMAN	Ig lambda-7 chain C region OS=Homo sapiens GN=IGLC7 PE=1 SV=2 - [LAC7_HUMAN]	0	6	0	0	0	2	0	0	0	0	0	0	0	0	8	0	1	0	1		P07686	0		A0M8Q6	0
Q8N9U0	TAC2N_HUMAN	Tandem C2 domains nuclear protein OS=Homo sapiens GN=TC2N PE=1 SV=2 - [TAC2N_HUMAN]	0	0	0	0	0	2	0	0	0	0	0	0	0	0	2	0	1	0	1		O95497	0		Q8N9U0	0
P51159	RB27A_HUMAN	Ras-related protein Rab-27A OS=Homo sapiens GN=RAB27A PE=1 SV=3 - [RB27A_HUMAN]	0	0	0	0	0	2	0	0	0	0	0	0	0	0	2	0	1	0	1		Q9Y696	0		P51159	0
P07384	CAN1_HUMAN	Calpain-1 catalytic subunit OS=Homo sapiens GN=CAPN1 PE=1 SV=1 - [CAN1_HUMAN]	0	8	0	0	0	1	0	0	0	0	0	0	0	0	9	0	1	0	1		Q9UBV8	0		P07384	0
O60262	GBG7_HUMAN	Guanine nucleotide-binding protein G(I)/G(S)/G(O) subunit gamma-7 OS=Homo sapiens GN=GNG7 PE=1 SV=1 - [GBG7_HUMAN]	3	0	0	0	0	1	0	0	0	0	0	0	0	0	4	0	1	0	1		P09327	0		O60262	0
P0C0L5	CO4B_HUMAN	Complement C4-B OS=Homo sapiens GN=C4B PE=1 SV=2 - [CO4B_HUMAN]	0	16	0	0	0	0	0	0	0	0	0	0	0	0	16	0	1	0	1		P19652	0		P0C0L5	0
P29622	KAIN_HUMAN	Kallistatin OS=Homo sapiens GN=SERPINA4 PE=1 SV=3 - [KAIN_HUMAN]	1	10	0	0	0	0	0	0	0	0	0	0	0	0	11	0	1	0	1		P68366	0		P29622	0
Q9Y2S2	CRYL1_HUMAN	Lambda-crystallin homolog OS=Homo sapiens GN=CRYL1 PE=1 SV=3 - [CRYL1_HUMAN]	1	8	0	0	0	0	0	0	0	0	0	0	0	0	9	0	1	0	1		P11216	0		Q9Y2S2	0
Q8TCD5	NT5C_HUMAN	5'(3')-deoxyribonucleotidase, cytosolic type OS=Homo sapiens GN=NT5C PE=1 SV=2 - [NT5C_HUMAN]	0	8	0	0	0	0	0	0	0	0	0	0	0	0	8	0	1	0	1		O15243	0		Q8TCD5	0
P51654	GPC3_HUMAN	Glypican-3 OS=Homo sapiens GN=GPC3 PE=1 SV=1 - [GPC3_HUMAN]	0	6	0	0	0	0	0	0	0	0	0	0	0	0	6	0	1	0	1		P02792	0		P51654	0
P15291	B4GT1_HUMAN	Beta-1,4-galactosyltransferase 1 OS=Homo sapiens GN=B4GALT1 PE=1 SV=5 - [B4GT1_HUMAN]	0	5	0	0	0	0	0	0	0	0	0	0	0	0	5	0	1	0	1		P43686	0		P15291	0
Q9UNW1	MINP1_HUMAN	Multiple inositol polyphosphate phosphatase 1 OS=Homo sapiens GN=MINPP1 PE=1 SV=1 - [MINP1_HUMAN]	0	4	0	0	0	0	0	0	0	0	0	0	0	0	4	0	1	0	1		P36873	0		Q9UNW1	0
Q16706	MA2A1_HUMAN	Alpha-mannosidase 2 OS=Homo sapiens GN=MAN2A1 PE=1 SV=2 - [MA2A1_HUMAN]	0	7	0	0	0	0	0	0	0	0	0	0	0	0	7	0	1	0	1		P13866	0		Q16706	0
P08185	CBG_HUMAN	Corticosteroid-binding globulin OS=Homo sapiens GN=SERPINA6 PE=1 SV=1 - [CBG_HUMAN]	0	6	0	0	0	0	0	0	0	0	0	0	0	0	6	0	1	0	1		Q3YBM2	0		P08185	0
Q15904	VAS1_HUMAN	V-type proton ATPase subunit S1 OS=Homo sapiens GN=ATP6AP1 PE=1 SV=2 - [VAS1_HUMAN]	0	4	0	0	0	0	0	0	0	0	0	0	0	0	4	0	1	0	1		Q9HBJ8	0		Q15904	0
P39059	COFA1_HUMAN	Collagen alpha-1(XV) chain OS=Homo sapiens GN=COL15A1 PE=1 SV=2 - [COFA1_HUMAN]	0	5	0	1	0	0	0	0	0	0	0	0	0	0	6	0	1	0	1		Q02413	0		P39059	0
Q92520	FAM3C_HUMAN	Protein FAM3C OS=Homo sapiens GN=FAM3C PE=1 SV=1 - [FAM3C_HUMAN]	0	2	0	0	0	0	0	0	0	0	0	0	0	0	2	0	1	0	1		P61006	0		Q92520	0
Q96DG6	CMBL_HUMAN	Carboxymethylenebutenolidase homolog OS=Homo sapiens GN=CMBL PE=1 SV=1 - [CMBL_HUMAN]	0	4	0	0	0	0	0	0	0	0	0	0	0	0	4	0	1	0	1		Q6PHR2	0		Q96DG6	0
P10768	ESTD_HUMAN	S-formylglutathione hydrolase OS=Homo sapiens GN=ESD PE=1 SV=2 - [ESTD_HUMAN]	0	5	0	0	0	0	0	0	0	0	0	0	0	0	5	0	1	0	1		P02511	0		P10768	0
P63267	ACTH_HUMAN	Actin, gamma-enteric smooth muscle OS=Homo sapiens GN=ACTG2 PE=1 SV=1 - [ACTH_HUMAN]	0	3	0	0	0	0	0	0	0	0	0	0	0	0	3	0	1	0	1		P11586	0		P63267	0
P24298	ALAT1_HUMAN	Alanine aminotransferase 1 OS=Homo sapiens GN=GPT PE=1 SV=3 - [ALAT1_HUMAN]	0	3	0	0	0	0	0	0	0	0	0	0	0	0	3	0	1	0	1		O15144	0		P24298	0
O43155	FLRT2_HUMAN	Leucine-rich repeat transmembrane protein FLRT2 OS=Homo sapiens GN=FLRT2 PE=1 SV=1 - [FLRT2_HUMAN]	0	4	0	0	0	0	0	0	0	0	0	0	0	0	4	0	1	0	1		P35998	0		O43155	0
Q9UKM7	MA1B1_HUMAN	Endoplasmic reticulum mannosyl-oligosaccharide 1,2-alpha-mannosidase OS=Homo sapiens GN=MAN1B1 PE=1 SV=2 - [MA1B1_HUMAN]	0	2	0	0	0	0	0	0	0	0	0	0	0	0	2	0	1	0	1		Q8N474	0		Q9UKM7	0
Q6P9A2	GLT18_HUMAN	Polypeptide N-acetylgalactosaminyltransferase 18 OS=Homo sapiens GN=GALNT18 PE=2 SV=2 - [GLT18_HUMAN]	0	2	0	0	0	0	0	0	0	0	0	0	0	0	2	0	1	0	1		Q4U2R8	0		Q6P9A2	0
P00439	PH4H_HUMAN	Phenylalanine-4-hydroxylase OS=Homo sapiens GN=PAH PE=1 SV=1 - [PH4H_HUMAN]	0	3	0	0	0	0	0	0	0	0	0	0	0	0	3	0	1	0	1		P12814	0		P00439	0
P01768	HV307_HUMAN	Ig heavy chain V-III region CAM OS=Homo sapiens PE=1 SV=1 - [HV307_HUMAN]	0	3	0	0	0	0	0	0	0	0	0	0	0	0	3	0	1	0	1		Q99828	0		P01768	0
P49862	KLK7_HUMAN	Kallikrein-7 OS=Homo sapiens GN=KLK7 PE=1 SV=1 - [KLK7_HUMAN]	0	5	0	0	0	0	0	0	0	0	0	0	0	0	5	0	1	0	1		O75348	0		P49862	0
Q9UKU9	ANGL2_HUMAN	Angiopoietin-related protein 2 OS=Homo sapiens GN=ANGPTL2 PE=2 SV=1 - [ANGL2_HUMAN]	0	4	0	0	0	0	0	0	0	0	0	0	0	0	4	0	1	0	1		P60660	0		Q9UKU9	0
P32926	DSG3_HUMAN	Desmoglein-3 OS=Homo sapiens GN=DSG3 PE=1 SV=2 - [DSG3_HUMAN]	0	3	0	0	0	0	0	0	0	0	0	0	0	0	3	0	1	0	1		O43583	0		P32926	0
Q9NY97	B3GN2_HUMAN	UDP-GlcNAc:betaGal beta-1,3-N-acetylglucosaminyltransferase 2 OS=Homo sapiens GN=B3GNT2 PE=1 SV=2 - [B3GN2_HUMAN]	0	3	0	0	0	0	0	0	0	0	0	0	0	0	3	0	1	0	1		P18827	0		Q9NY97	0
P02652	APOA2_HUMAN	Apolipoprotein A-II OS=Homo sapiens GN=APOA2 PE=1 SV=1 - [APOA2_HUMAN]	0	3	0	0	0	0	0	0	0	0	0	0	0	0	3	0	1	0	1		O15145	0		P02652	0
P52823	STC1_HUMAN	Stanniocalcin-1 OS=Homo sapiens GN=STC1 PE=1 SV=1 - [STC1_HUMAN]	0	2	0	0	0	0	0	0	0	0	0	0	0	0	2	0	1	0	1		Q16348	0		P52823	0
P02765	FETUA_HUMAN	Alpha-2-HS-glycoprotein OS=Homo sapiens GN=AHSG PE=1 SV=1 - [FETUA_HUMAN]	0	2	0	0	0	0	0	0	0	0	0	0	0	0	2	0	1	0	1		Q04756	0		P02765	0
P23284	PPIB_HUMAN	Peptidyl-prolyl cis-trans isomerase B OS=Homo sapiens GN=PPIB PE=1 SV=2 - [PPIB_HUMAN]	0	3	0	0	0	0	0	0	0	0	0	0	0	0	3	0	1	0	1		O15374	0		P23284	0
O75487	GPC4_HUMAN	Glypican-4 OS=Homo sapiens GN=GPC4 PE=1 SV=4 - [GPC4_HUMAN]	0	2	0	0	0	0	0	0	0	0	0	0	0	0	2	0	1	0	1		Q9H6X2	0		O75487	0
Q16832	DDR2_HUMAN	Discoidin domain-containing receptor 2 OS=Homo sapiens GN=DDR2 PE=1 SV=2 - [DDR2_HUMAN]	0	2	0	0	0	0	0	0	0	0	0	0	0	0	2	0	1	0	1		P00995	0		Q16832	0
P05120	PAI2_HUMAN	Plasminogen activator inhibitor 2 OS=Homo sapiens GN=SERPINB2 PE=1 SV=2 - [PAI2_HUMAN]	0	3	0	0	0	0	0	0	0	0	0	0	0	0	3	0	1	0	1		Q9H2V7	0		P05120	0
P52758	UK114_HUMAN	Ribonuclease UK114 OS=Homo sapiens GN=HRSP12 PE=1 SV=1 - [UK114_HUMAN]	0	2	0	0	0	0	0	0	0	0	0	0	0	0	2	0	1	0	1		P08246	0		P52758	0
P13797	PLST_HUMAN	Plastin-3 OS=Homo sapiens GN=PLS3 PE=1 SV=4 - [PLST_HUMAN]	0	2	0	0	0	0	0	0	0	0	0	0	0	0	2	0	1	0	1		P16035	0		P13797	0
P46782	RS5_HUMAN	40S ribosomal protein S5 OS=Homo sapiens GN=RPS5 PE=1 SV=4 - [RS5_HUMAN]	0	2	0	0	0	0	0	0	0	0	0	0	0	0	2	0	1	0	1		Q99715	0		P46782	0
Q02809	PLOD1_HUMAN	Procollagen-lysine,2-oxoglutarate 5-dioxygenase 1 OS=Homo sapiens GN=PLOD1 PE=1 SV=2 - [PLOD1_HUMAN]	0	2	0	0	0	0	0	0	0	0	0	0	0	0	2	0	1	0	1		P08779	0		Q02809	0
Q99574	NEUS_HUMAN	Neuroserpin OS=Homo sapiens GN=SERPINI1 PE=1 SV=1 - [NEUS_HUMAN]	1	4	0	1	0	0	0	0	0	0	0	0	0	0	6	0	1	0	1		Q9NPF0	0		Q99574	0
P06280	AGAL_HUMAN	Alpha-galactosidase A OS=Homo sapiens GN=GLA PE=1 SV=1 - [AGAL_HUMAN]	0	3	0	0	0	0	0	0	0	0	0	0	0	0	3	0	1	0	1		P19971	0		P06280	0
P22352	GPX3_HUMAN	Glutathione peroxidase 3 OS=Homo sapiens GN=GPX3 PE=1 SV=2 - [GPX3_HUMAN]	0	3	0	0	0	0	0	0	0	0	0	0	0	0	3	0	1	0	1		P23381	0		P22352	0
Q96BW5	PTER_HUMAN	Phosphotriesterase-related protein OS=Homo sapiens GN=PTER PE=1 SV=1 - [PTER_HUMAN]	0	3	0	0	0	0	0	0	0	0	0	0	0	0	3	0	1	0	1		P41091	0		Q96BW5	0
Q96KK5	H2A1H_HUMAN	Histone H2A type 1-H OS=Homo sapiens GN=HIST1H2AH PE=1 SV=3 - [H2A1H_HUMAN]	0	2	0	0	0	0	0	0	0	0	0	0	0	0	2	0	1	0	1		O95274	0		Q96KK5	0
Q8TDQ7	GNPI2_HUMAN	Glucosamine-6-phosphate isomerase 2 OS=Homo sapiens GN=GNPDA2 PE=1 SV=1 - [GNPI2_HUMAN]	0	2	0	0	0	0	0	0	0	0	0	0	0	0	2	0	1	0	1		P07237	0		Q8TDQ7	0
P14625	ENPL_HUMAN	Endoplasmin OS=Homo sapiens GN=HSP90B1 PE=1 SV=1 - [ENPL_HUMAN]	0	2	0	0	0	0	0	0	0	0	0	0	0	0	2	0	1	0	1		P22531	0		P14625	0
O75503	CLN5_HUMAN	Ceroid-lipofuscinosis neuronal protein 5 OS=Homo sapiens GN=CLN5 PE=1 SV=2 - [CLN5_HUMAN]	0	2	0	2	0	0	0	0	0	0	0	0	0	0	4	0	1	0	1		P35325	0		O75503	0
P15531	NDKA_HUMAN	Nucleoside diphosphate kinase A OS=Homo sapiens GN=NME1 PE=1 SV=1 - [NDKA_HUMAN]	0	2	0	0	0	0	0	0	0	0	0	0	0	0	2	0	1	0	1		P31153	0		P15531	0
Q9UEF7	KLOT_HUMAN	Klotho OS=Homo sapiens GN=KL PE=1 SV=2 - [KLOT_HUMAN]	0	2	0	0	0	0	0	0	0	0	0	0	0	0	2	0	1	0	1		P19105	0		Q9UEF7	0
Q9H2A2	AL8A1_HUMAN	Aldehyde dehydrogenase family 8 member A1 OS=Homo sapiens GN=ALDH8A1 PE=1 SV=1 - [AL8A1_HUMAN]	0	2	0	0	0	0	0	0	0	0	0	0	0	0	2	0	1	0	1		P18206	0		Q9H2A2	0
P00736	C1R_HUMAN	Complement C1r subcomponent OS=Homo sapiens GN=C1R PE=1 SV=2 - [C1R_HUMAN]	0	2	0	0	0	0	0	0	0	0	0	0	0	0	2	0	1	0	1		P19367	0		P00736	0
Q8NI99	ANGL6_HUMAN	Angiopoietin-related protein 6 OS=Homo sapiens GN=ANGPTL6 PE=1 SV=1 - [ANGL6_HUMAN]	0	2	0	0	0	0	0	0	0	0	0	0	0	0	2	0	1	0	1		P29144	0		Q8NI99	0
P35606	COPB2_HUMAN	Coatomer subunit beta' OS=Homo sapiens GN=COPB2 PE=1 SV=2 - [COPB2_HUMAN]	0	2	0	0	0	0	0	0	0	0	0	0	0	0	2	0	1	0	1		P62906	0		P35606	0
Q14118	DAG1_HUMAN	Dystroglycan OS=Homo sapiens GN=DAG1 PE=1 SV=2 - [DAG1_HUMAN]	0	2	0	0	0	0	0	0	0	0	0	0	0	0	2	0	1	0	1		Q99798	0		Q14118	0
P08697	A2AP_HUMAN	Alpha-2-antiplasmin OS=Homo sapiens GN=SERPINF2 PE=1 SV=3 - [A2AP_HUMAN]	0	2	0	0	0	0	0	0	0	0	0	0	0	0	2	0	1	0	1		P10809	0		P08697	0
P58499	FAM3B_HUMAN	Protein FAM3B OS=Homo sapiens GN=FAM3B PE=1 SV=2 - [FAM3B_HUMAN]	0	0	0	2	0	0	0	0	0	0	0	0	0	0	2	0	1	0	1		Q96RM1	0		P58499	0
O15230	LAMA5_HUMAN	Laminin subunit alpha-5 OS=Homo sapiens GN=LAMA5 PE=1 SV=8 - [LAMA5_HUMAN]	0	0	0	2	0	0	0	0	0	0	0	0	0	0	2	0	1	0	1		O95782	0		O15230	0
P20138	CD33_HUMAN	Myeloid cell surface antigen CD33 OS=Homo sapiens GN=CD33 PE=1 SV=2 - [CD33_HUMAN]	0	0	0	2	0	0	0	0	0	0	0	0	0	0	2	0	1	0	1		O94973	0		P20138	0
O00533	NCHL1_HUMAN	Neural cell adhesion molecule L1-like protein OS=Homo sapiens GN=CHL1 PE=1 SV=4 - [CHL1_HUMAN]	0	0	0	2	0	0	0	0	0	0	0	0	0	0	2	0	1	0	1		P01609	0		O00533	0
Q8WZ42	TITIN_HUMAN	Titin OS=Homo sapiens GN=TTN PE=1 SV=4 - [TITIN_HUMAN]	0	0	0	0	2	0	0	0	0	0	0	0	0	0	2	0	1	0	1		P01598	0		Q8WZ42	0
Q8IYJ1	CPNE9_HUMAN	Copine-9 OS=Homo sapiens GN=CPNE9 PE=1 SV=3 - [CPNE9_HUMAN]	2	0	0	0	0	0	0	0	0	0	0	0	0	0	2	0	1	0	1		Q01459	0		Q8IYJ1	0
P46778	RL21_HUMAN	60S ribosomal protein L21 OS=Homo sapiens GN=RPL21 PE=1 SV=2 - [RL21_HUMAN]	0	0	2	0	0	0	0	0	0	0	0	0	0	0	2	0	1	0	1		Q02747	0		P46778	0
P62263	RS14_HUMAN	40S ribosomal protein S14 OS=Homo sapiens GN=RPS14 PE=1 SV=3 - [RS14_HUMAN]	0	0	2	0	0	0	0	0	0	0	0	0	0	0	2	0	1	0	1		P01764	0		P62263	0
P07910	HNRPC_HUMAN	Heterogeneous nuclear ribonucleoproteins C1/C2 OS=Homo sapiens GN=HNRNPC PE=1 SV=4 - [HNRPC_HUMAN]	0	0	2	0	0	0	0	0	0	0	0	0	0	0	2	0	1	0	1		Q9Y5Y7	0		P07910	0

## Sheet: Synapt-PG
														Normalized abundance											Raw abundance
														Control						Cirrhotic					Control						Cirrhotic					Tags
Accession	Description	Peptide count	Unique peptides	Confidence score	Anova (p)	q Value	Max fold change	Power	Highest mean condition	AV Ctrl	AV Cirro	Cirro/Ctrl	Mass	1	2	3	4	5	6	7	8	10	12	13	1	2	3	4	5	6	7	8	10	12	13	2pepts
S47A1_HUMAN	Multidrug and toxin extrusion protein 1 OS=Homo sapiens GN=SLC47A1 PE=1 SV=1	3	3	147.07	0.000114987	0.0939878	30.5609	0.999913	Cirrho	37.2795	720.83	19.3358	62680	14.9084	42.1528	9.44285	6.4803	137.599	13.0936	1768.85	1271.8	1326.74	252.672	1076.41	9.23828	89.4609	3.64346	4.89693	48.6119	12.32	958.535	791.988	1016.23	586.559	831.565	x
CLH1_HUMAN	Clathrin heavy chain 1 OS=Homo sapiens GN=CLTC PE=1 SV=5	2	2	94.59	0.000443504	0.181255	29.5195	0.997504	Cirrho	85.7968	1590.01	18.5323	193260	6.42122	55.3829	213.241	174.546	14.7062	50.4837	3567.93	3647.06	919.631	728.308	3800.46	3.97902	117.539	82.2776	131.898	5.1955	47.501	1933.45	2271.14	704.399	1690.71	2935.98	x
SERC1_HUMAN	Serine incorporator 1 OS=Homo sapiens GN=SERINC1 PE=1 SV=1	2	2	205.48	0.000949218	0.258624	6.4	0.989749	Cirrho	478.031	2059.93	4.30919	51488	769.412	339.945	208.939	702.42	156.11	691.362	2912.94	2970.11	5760.41	1074.98	2578.56	476.779	721.465	80.618	530.794	55.1514	650.514	1578.52	1849.58	4412.23	2495.48	1992.02	x
ACE_HUMAN	Angiotensin-converting enzyme OS=Homo sapiens GN=ACE PE=1 SV=1	15	15	660.28	0.00162753	0.266061	4.97968	0.976436	Cirrho	1331.94	4454.53	3.3444	150418	1346.94	1194.05	713.378	842.568	3448.02	446.672	5444.04	10864	5470.81	2566.32	8818.01	834.654	2534.14	275.253	636.698	1218.14	420.281	2950.11	6765.34	4190.41	5957.51	6812.2	x
HRG_HUMAN	Histidine-rich glycoprotein OS=Homo sapiens GN=HRG PE=1 SV=1	4	3	290.63	0.00288043	0.296811	20.039	0.950124	Cirrho	250.907	3143.78	12.5297	60510	4.95883	1370.07	0	122.35	0	8.06355	934.713	7846.46	5040.01	7921.01	3397.37	3.07282	2907.7	0	92.4556	0	7.58713	506.519	4886.25	3860.44	18388	2624.58	x
WFDC2_HUMAN	WAP four-disulfide core domain protein 2 OS=Homo sapiens GN=WFDC2 PE=1 SV=2	3	3	183.46	0.00298717	0.296811	2993.44	0.947901	Control	3293.56	624.825	0.189711	13953	1993.17	0	5304.88	4057.75	7063.91	1341.69	0	0	5.5013	0	0	1235.1	0	2046.86	3066.29	2495.58	1262.41	0	0	4.21377	0	0	x
SC5AA_HUMAN	Sodium/glucose cotransporter 5 OS=Homo sapiens GN=SLC5A10 PE=1 SV=2	3	3	209.76	0.00367543	0.300422	8.31485	0.9338	Cirrho	1129.37	6118.77	5.41786	64928	450.081	311.578	700.106	3033.75	727.457	1553.25	17727	15969.5	8261.15	2554.33	2440.77	278.901	661.263	270.131	2292.5	257.001	1461.48	9606.21	9944.73	6327.7	5929.69	1885.57	x
CHM4C_HUMAN	Charged multivesicular body protein 4c OS=Homo sapiens GN=CHMP4C PE=1 SV=1	4	4	232.12	0.00453814	0.337216	5.68217	0.916805	Cirrho	286.218	1078.23	3.76716	26394	421.75	131.944	453.81	329.623	212.591	167.589	2883.74	2209.15	1769.36	310.961	958.482	261.345	280.024	175.1	249.084	75.1056	157.688	1562.69	1375.71	1355.25	721.873	740.458	x
EHD1_HUMAN	EH domain-containing protein 1 OS=Homo sapiens GN=EHD1 PE=1 SV=2	14	14	579.15	0.00611784	0.379392	8.92031	0.887795	Cirrho	436.525	2433.71	5.57519	60646	0	68.8741	0	2550.27	0	0	8742.98	1190.35	7142.7	384.219	2009.43	0	146.172	0	1927.15	0	0	4737.8	741.27	5471.01	891.937	1552.35	x
A1BG_HUMAN	Alpha-1B-glycoprotein OS=Homo sapiens GN=A1BG PE=1 SV=4	8	7	342.98	0.00615181	0.379392	36.5622	0.887201	Cirrho	1013.62	23163.1	22.8519	54790	0	396.162	0	5681.3	0	4.25127	85568.8	22022.7	30442.2	267.618	46999.5	0	840.775	0	4293.15	0	4.00009	46369.5	13714.3	23317.4	621.255	36308.6	x
NHRF1_HUMAN	Na(+)/H(+) exchange regulatory cofactor NHE-RF1 OS=Homo sapiens GN=SLC9A3R1 PE=1 SV=4	11	10	676.73	0.00773714	0.379392	2.62044	0.860727	Cirrho	2930.94	5520.71	1.8836	39130	3003.3	1358.57	5874.89	2028.31	1877.61	3442.96	12062.4	10577.5	4405.3	5706.13	5650.51	1861.05	2883.3	2266.79	1532.72	663.335	3239.54	6536.59	6586.92	3374.27	13246.4	4365.2	x
DEF1_HUMAN	Neutrophil defensin 1 OS=Homo sapiens GN=DEFA1 PE=1 SV=1	3	3	144.89	0.00889361	0.379392	8.25146	0.842862	Cirrho	1018.17	5563.18	5.46388	10536	952.665	1036.35	756.679	368.296	1548.75	1446.3	1788.67	5292.61	2636.42	3489.88	28799.5	590.335	2199.44	291.96	278.308	547.152	1360.85	969.278	3295.88	2019.38	8101.5	22248.5	x
ASAH1_HUMAN	Acid ceramidase OS=Homo sapiens GN=ASAH1 PE=1 SV=5	7	7	333.31	0.00979701	0.379392	2.60931	0.829664	Cirrho	6116.36	10825.7	1.76996	45087	2058.12	3758.43	8579.1	12878.6	5674	3749.87	17048.4	24980.7	15703.1	9149.5	12915.5	1275.35	7976.52	3310.19	9731.91	2004.55	3528.31	9238.49	15556.3	12027.9	21239.9	9977.65	x
SIM24_HUMAN	Small integral membrane protein 24 OS=Homo sapiens GN=SMIM24 PE=2 SV=2	5	5	246.57	0.0103971	0.379392	6.73635	0.821234	Cirrho	802.712	3560.14	4.43513	15012	1331.43	52.5617	888.297	936.758	1519.63	87.5946	3411.46	9132.54	2334.15	2811.01	9347.61	825.043	111.552	342.744	707.874	536.866	82.4192	1848.66	5687.13	1787.86	6525.56	7221.33	x
TRFM_HUMAN	Melanotransferrin OS=Homo sapiens GN=MFI2 PE=1 SV=2	4	4	191.05	0.0108029	0.379392	3.3675	0.815679	Control	940.034	339.18	0.360817	81760	402.239	382.493	1495.33	1719.19	809.271	831.676	125.339	391.581	470.763	262.681	145.381	249.254	811.765	576.964	1299.13	285.905	782.538	67.9208	243.85	360.584	609.794	112.312	x
RHCG_HUMAN	Ammonium transporter Rh type C OS=Homo sapiens GN=RHCG PE=1 SV=1	2	2	73.09	0.0116936	0.379392	10.1804	0.803867	Control	3259.56	1567.37	0.480854	53600	10797.7	1037.54	2248.98	641.884	508.355	4322.92	93.6413	141.503	447.13	298.073	620.551	6690.97	2201.96	867.757	485.049	179.595	4067.5	50.744	88.1187	342.483	691.955	479.396	x
MB12A_HUMAN	Multivesicular body subunit 12A OS=Homo sapiens GN=MVB12A PE=1 SV=1	7	7	429.21	0.0130145	0.38623	7.156	0.787248	Cirrho	1090.68	5314.58	4.87274	29107	565.827	1299.68	20.593	1288.47	48.9791	3320.51	16109.2	6929.95	6761.51	4827.96	4395.73	350.625	2758.31	7.94567	973.652	17.3036	3124.32	8729.55	4315.5	5179.03	11207.7	3395.84	x
CATC_HUMAN	Dipeptidyl peptidase 1 OS=Homo sapiens GN=CTSC PE=1 SV=2	6	6	418.1	0.013322	0.38623	12.7422	0.783522	Cirrho	324.919	2595.77	7.98897	52619	0	183.339	0	1581.47	184.707	0	3856.01	4089.55	9807.12	476.481	2471.72	0	389.1	0	1195.06	65.2545	0	2089.56	2546.7	7511.84	1106.12	1909.48	x
CATB_HUMAN	Cathepsin B OS=Homo sapiens GN=CTSB PE=1 SV=3	3	3	218.05	0.0137524	0.38623	4.94675	0.778393	Cirrho	414.051	1397.76	3.37583	38766	208.52	482.003	74.9933	526.49	527.514	664.786	3662.06	1066.13	3829.19	1117.57	566.081	129.213	1022.96	28.9357	397.85	186.364	625.508	1984.46	663.917	2933	2594.36	437.316	x
BGAL_HUMAN	Beta-galactosidase OS=Homo sapiens GN=GLB1 PE=1 SV=2	7	6	436.48	0.0145837	0.38623	3.08094	0.768756	Cirrho	1890.86	4139.75	2.18935	76483	1041.42	1816.24	402.724	3306.18	1959.97	2818.63	9652.65	2806.22	3608.29	7648.76	5412.21	645.332	3854.61	155.388	2498.36	692.43	2652.09	5230.75	1747.53	2763.8	17756	4181.1	x
AMPN_HUMAN	Aminopeptidase N OS=Homo sapiens GN=ANPEP PE=1 SV=4	46	46	3416.62	0.0155933	0.38623	9.44835	0.757503	Cirrho	7592.67	45143.6	5.94568	109870	64.1019	8472.98	14.4375	33452.3	1573.06	1979.14	127380	49072.5	49655.9	15823.3	116759	39.7218	17982.2	5.57062	25278.7	555.741	1862.21	69027.1	30559	38034.3	36732.7	90200	x
CD9_HUMAN	CD9 antigen OS=Homo sapiens GN=CD9 PE=1 SV=4	4	4	253.82	0.0161301	0.387776	9.34603	0.751708	Control	8915.91	4812.22	0.539734	25969	23530.7	3830.48	3475.41	1360.44	1520.31	19778.2	2419.74	687.245	867.121	484.343	311.443	14581.2	8129.43	1340.96	1028.03	537.106	18609.6	1311.25	427.97	664.179	1124.37	240.6	x
CADH1_HUMAN	Cadherin-1 OS=Homo sapiens GN=CDH1 PE=1 SV=3	4	4	215.88	0.0171238	0.394504	10.7769	0.741306	Cirrho	241.18	1784.01	7.39702	97852	244.528	7.2244	0	0	0	1195.33	1887.21	473.493	348.592	379.861	9906.73	151.526	15.3324	0	0	0	1124.7	1022.67	294.86	267.007	881.819	7653.27	x
AMPE_HUMAN	Glutamyl aminopeptidase OS=Homo sapiens GN=ENPEP PE=1 SV=3	14	14	580.61	0.0185642	0.410107	2.562	0.726922	Cirrho	922.374	1856.05	2.01225	109689	1784.82	226.236	260.715	337.025	1405.41	1520.05	2513.07	2450.94	2992.02	1896.51	1963.08	1105.99	480.142	100.595	254.678	496.511	1430.24	1361.83	1526.28	2291.76	4402.62	1516.54	x
SLC31_HUMAN	Neutral and basic amino acid transport protein rBAT OS=Homo sapiens GN=SLC3A1 PE=1 SV=2	3	3	156.32	0.019353	0.416282	2.40817	0.719368	Cirrho	280.369	452.758	1.61487	79258	141.738	820.546	434.024	56.2254	98.2699	131.409	692.591	871.065	529.664	698.336	584.214	87.8302	1741.45	167.465	42.4875	34.7175	123.645	375.313	542.441	405.7	1621.14	451.324	x
SO4C1_HUMAN	Solute carrier organic anion transporter family member 4C1 OS=Homo sapiens GN=SLCO4C1 PE=1 SV=1	3	3	111.05	0.0205477	0.420322	3.57627	0.708327	Cirrho	217.191	537.231	2.47354	80379	70.0976	499.567	79.9256	201.117	93.5463	358.894	513.476	448.161	265.786	819.147	1837.1	43.4372	1060.23	30.8388	151.977	33.0487	337.689	278.252	279.084	203.581	1901.59	1419.22	x
NPT4_HUMAN	Sodium-dependent phosphate transport protein 4 OS=Homo sapiens GN=SLC17A3 PE=1 SV=2	4	4	303.09	0.020938	0.420322	4.51858	0.70482	Cirrho	618.778	1904.93	3.07854	46703	49.7912	468.264	37.1327	331.236	2434.62	391.632	4486.19	4835.95	1939.12	628.163	2090.59	30.854	993.798	14.3274	250.303	860.117	368.493	2431.05	3011.5	1485.28	1458.23	1615.05	x
NAPSA_HUMAN	Napsin-A OS=Homo sapiens GN=NAPSA PE=1 SV=1	6	6	472.81	0.0210835	0.420322	2.19278	0.703524	Cirrho	11340.8	18122.6	1.598	45700	8744.74	5084.1	8865.06	9577.06	31376.7	4397.29	33824.1	28537	25382.3	12609.2	23987.3	5418.83	10790	3420.53	7237.04	11085	4137.48	18329.2	17770.9	19441.8	29271.4	18531	x
MT1E_HUMAN	Metallothionein-1E OS=Homo sapiens GN=MT1E PE=1 SV=1	2	2	142	0.0238546	0.429892	596.774	0.680017	Cirrho	1.92365	717.49	372.983	7150	0	0	0	11.5419	0	0	3279.27	831.581	1626.25	2.81988	0	0	0	0	8.7218	0	0	1777.03	517.853	1245.64	6.54614	0	x
BAIP2_HUMAN	Brain-specific angiogenesis inhibitor 1-associated protein 2 OS=Homo sapiens GN=BAIAP2 PE=1 SV=1	10	10	494.77	0.0242381	0.429892	3.72204	0.676927	Cirrho	188.889	485.804	2.5719	61115	118.621	83.6873	129.025	70.3016	665.04	66.6569	241.648	343.773	837.759	1811.94	280.136	73.5053	177.61	49.7837	53.1244	234.95	62.7186	130.949	214.079	641.689	4206.28	216.414	x
SC5A1_HUMAN	Sodium/glucose cotransporter 1 OS=Homo sapiens GN=SLC5A1 PE=1 SV=1	10	9	424.59	0.024905	0.429892	4.58983	0.671641	Cirrho	220.129	664.009	3.01646	74305	17.4228	348.558	172.008	355.104	260.208	167.472	243.062	1723.38	848.368	1638.09	598.87	10.7963	739.745	66.3681	268.34	91.9281	157.577	131.715	1073.21	649.814	3802.71	462.646	x
AQP1_HUMAN	Aquaporin-1 OS=Homo sapiens GN=AQP1 PE=1 SV=3	5	5	475.07	0.025099	0.429892	3.72729	0.670123	Cirrho	14310	36681.6	2.56335	28736	4033.23	5198.36	15162.1	17661.1	28847.5	14957.9	105739	74052.7	46785.7	13103	27007.8	2499.26	11032.5	5850.2	13345.9	10191.4	14074.2	57299.6	46115	35835.9	30417.7	20864.4	x
GDF15_HUMAN	Growth/differentiation factor 15 OS=Homo sapiens GN=GDF15 PE=1 SV=3	2	2	100.25	0.0259416	0.429892	5.00936	0.663636	Cirrho	563.427	1764.01	3.13085	34632	0	469.463	0	2911.1	0	0	2672.86	4396.02	6011.99	53.879	977.306	0	996.342	0	2199.81	0	0	1448.41	2737.54	4604.93	125.076	755	x
GRN_HUMAN	Granulins OS=Homo sapiens GN=GRN PE=1 SV=2	2	2	87.34	0.0262185	0.429892	10.9199	0.66154	Cirrho	182.708	1248.83	6.83508	68518	0	0	1054.33	0	41.9177	0	3676.07	2581.6	422.622	4.04183	3291.46	0	0	406.808	0	14.809	0	1992.05	1607.65	323.711	9.3828	2542.76	x
CFAH_HUMAN	Complement factor H OS=Homo sapiens GN=CFH PE=1 SV=4	12	11	577.52	0.026297	0.429892	10.2768	0.660949	Cirrho	1802	12172.2	6.75484	143680	1159.14	2795.12	506.07	1926.57	166.997	4258.08	2149.37	27772.5	8604.76	2510.09	51557	718.281	5932.09	195.264	1455.84	58.9976	4006.5	1164.74	17294.9	6590.89	5826.98	39829.4	x
KAP2_HUMAN	cAMP-dependent protein kinase type II-alpha regulatory subunit OS=Homo sapiens GN=PRKAR2A PE=1 SV=2	2	2	90.59	0.0278185	0.435	3.50817	0.649756	Cirrho	103.313	288.76	2.79501	45832	0	17.5114	12.918	53.6137	10.6954	525.138	665.71	233.792	251.653	556.824	104.214	0	37.1645	4.98434	40.514	3.77853	494.111	360.747	145.59	192.755	1292.63	80.509	x
GDPD3_HUMAN	Glycerophosphodiester phosphodiesterase domain-containing protein 3 OS=Homo sapiens GN=GDPD3 PE=2 SV=3	5	5	317.62	0.0281902	0.435	5.02807	0.647095	Cirrho	591.826	1919.17	3.24279	36972	49.9531	864.344	435.168	1285.16	712.244	204.092	1542.8	2177.09	8876.73	996.463	1285.64	30.9543	1834.4	167.907	971.147	251.626	192.033	836.039	1355.74	6799.2	2313.22	993.201	x
NRP1_HUMAN	Neuropilin-1 OS=Homo sapiens GN=NRP1 PE=1 SV=3	2	2	107.66	0.028206	0.435	16.2097	0.646982	Cirrho	54.587	559.595	10.2514	104323	0	138.39	112.96	13.6844	10.5977	51.8906	1151.88	1187.58	1951.08	77.1877	56.47	0	293.705	43.5848	10.3408	3.74402	48.8247	624.201	739.542	1494.44	179.186	43.6249	x
ADSV_HUMAN	Adseverin OS=Homo sapiens GN=SCIN PE=1 SV=4	2	2	107.18	0.0303035	0.450354	12.7926	0.632482	Cirrho	114.559	918.581	8.01838	80895	0	102.273	254.678	289.436	29.7509	11.2196	2325.77	1175.61	3426.41	105.966	293.824	0	217.054	98.2658	218.716	10.5106	10.5567	1260.33	732.089	2624.49	245.992	226.988	x
VPS28_HUMAN	Vacuolar protein sorting-associated protein 28 homolog OS=Homo sapiens GN=VPS28 PE=1 SV=1	7	6	383.32	0.0339267	0.452514	3.60247	0.609269	Control	2450.48	1259.71	0.514065	25694	3260.35	362.949	2883.77	1465.34	2853.14	3877.32	185.499	446.517	1126.66	1199.13	443.307	2020.33	770.287	1112.68	1107.31	1007.98	3648.23	100.522	278.061	862.971	2783.69	342.469	x
SUSD2_HUMAN	Sushi domain-containing protein 2 OS=Homo sapiens GN=SUSD2 PE=1 SV=1	8	8	366.27	0.0367921	0.452514	4.4699	0.592346	Cirrho	910.987	2551.74	2.80107	91746	0	1725.22	0	3601.81	130.802	8.09267	7842.09	6651.18	2937.09	604.092	2325.66	0	3661.43	0	2721.76	46.2105	7.61452	4249.61	4141.9	2249.68	1402.36	1796.65	x
GAPR1_HUMAN	Golgi-associated plant pathogenesis-related protein 1 OS=Homo sapiens GN=GLIPR2 PE=1 SV=3	2	2	133.96	0.0370077	0.452514	3.85167	0.59112	Cirrho	164.39	424.674	2.58334	17322	284.122	111.147	80.9288	368.036	133.149	8.95454	488.051	753.328	682.381	148.348	1093.76	176.061	235.887	31.2259	278.112	47.0398	8.42548	264.474	469.122	522.675	344.378	844.966	x
PERM_HUMAN	Myeloperoxidase OS=Homo sapiens GN=MPO PE=1 SV=1	11	10	578.83	0.038321	0.452514	11.5212	0.583777	Cirrho	802.398	5886.08	7.33561	84784	271.37	1785.07	859.396	974.189	293.304	631.057	1789.77	21687.7	1032.19	908.401	20805	168.159	3788.47	331.592	736.16	103.621	593.772	969.871	13505.6	790.616	2108.79	16072.5	x
SPHM_HUMAN	N-sulphoglucosamine sulphohydrolase OS=Homo sapiens GN=SGSH PE=1 SV=1	3	3	186.83	0.0385812	0.452514	10.7729	0.582348	Cirrho	148.872	1025.72	6.88999	57173	61.4238	519.567	102.677	40.2188	17.8314	151.512	922.705	6277.21	151.878	168.164	498.912	38.0623	1102.68	39.6173	30.3919	6.29961	142.56	500.012	3909.02	116.332	390.38	385.426	x
MXRA5_HUMAN	Matrix-remodeling-associated protein 5 OS=Homo sapiens GN=MXRA5 PE=2 SV=3	2	2	79.6	0.0389876	0.452514	5.33445	0.580133	Cirrho	144.021	480.171	3.33403	314065	0	41.6522	0	822.474	0	0	551.418	1399.24	1851.5	22.032	17.1807	0	88.3985	0	621.514	0	0	298.812	871.349	1418.17	51.1457	13.2727	x
CERU_HUMAN	Ceruloplasmin OS=Homo sapiens GN=CP PE=1 SV=1	18	18	1029.18	0.0391111	0.452514	11.1262	0.579464	Cirrho	6845.39	48501	7.08521	122983	755.697	3931.94	13214.8	10982.4	8073.52	4113.94	180762	56903	38251.6	2008.44	102892	468.281	8344.75	5098.85	8299.01	2852.27	3870.88	97954.4	35435.3	29299.2	4662.44	79487	x
SC5AC_HUMAN	Sodium-coupled monocarboxylate transporter 2 OS=Homo sapiens GN=SLC5A12 PE=2 SV=2	6	6	269.69	0.040747	0.452514	2.29163	0.570775	Cirrho	1677.04	3179.89	1.89613	68629	378.36	889.018	277.136	881.732	2035.19	5600.82	7536.87	2922.8	2326.7	3248.71	3180.71	234.457	1886.76	106.931	666.293	719.005	5269.91	4084.21	1820.12	1782.16	7541.63	2457.2	x
TS101_HUMAN	Tumor susceptibility gene 101 protein OS=Homo sapiens GN=TSG101 PE=1 SV=2	9	9	466.44	0.0420264	0.452514	1.80974	0.564193	Cirrho	2370.72	3376.93	1.42443	44088	4192.62	1073.89	1450.33	2907.72	2318.69	2281.05	3990.07	5141.65	4656.59	2124.23	5539.41	2598.03	2279.12	559.602	2197.26	819.163	2146.27	2162.21	3201.87	3566.75	4931.25	4279.38	x
BASP1_HUMAN	Brain acid soluble protein 1 OS=Homo sapiens GN=BASP1 PE=1 SV=2	9	9	486.18	0.0432923	0.452514	3.90411	0.557855	Cirrho	2450.63	6390.17	2.60757	22680	404.829	63.0218	10216.1	528.221	429.482	3062.14	16696.5	15785.4	4123.19	1123.61	10108.9	250.859	133.751	3941.81	399.158	151.73	2881.22	9047.77	9830.07	3158.19	2608.37	7809.48	x
AAAT_HUMAN	Neutral amino acid transporter B(0) OS=Homo sapiens GN=SLC1A5 PE=1 SV=2	2	2	103.23	0.0442641	0.452514	3.94017	0.553102	Cirrho	218.767	538.805	2.46292	57018	0	1312.01	0	0	0	0.590531	1072.89	424.73	1561.76	1250.5	0	0	2784.48	0	0	0	0.55564	581.397	264.493	1196.25	2902.95	0	x
MXRA8_HUMAN	Matrix-remodeling-associated protein 8 OS=Homo sapiens GN=MXRA8 PE=1 SV=1	8	7	435.64	0.0464154	0.452514	2.37318	0.54291	Control	10592.7	5170.55	0.488126	49500	7186.91	15868.1	10450.7	3971.89	16922.2	9156.1	5492.2	3835.56	8741.02	810.076	3438.55	4453.49	33677	4032.34	3001.41	5978.39	8615.12	2976.21	2388.53	6695.25	1880.53	2656.39	x
PPAL_HUMAN	Lysosomal acid phosphatase OS=Homo sapiens GN=ACP2 PE=1 SV=3	7	7	292.37	0.0471497	0.452514	4.22835	0.539531	Control	3053.85	1029.56	0.337135	48713	4650.35	4285.39	386.231	5876.08	2036.61	1088.46	854.848	1147.23	289.976	789.35	529.757	2881.67	9094.88	149.025	4440.34	719.508	1024.15	463.24	714.417	222.11	1832.42	409.255	x
KV402_HUMAN	Ig kappa chain V-IV region Len OS=Homo sapiens PE=1 SV=2	2	2	143.31	0.0475747	0.452514	5.26577	0.537597	Cirrho	1682	5795.83	3.4458	12746	63.4191	1186.42	0	6671.7	0	2170.47	10809.7	13359.5	2057.92	3578.16	14479.9	39.2987	2517.94	0	5041.57	0	2042.23	5857.72	8319.42	1576.28	8306.44	11186.2	x
CN37_HUMAN	2',3'-cyclic-nucleotide 3'-phosphodiesterase OS=Homo sapiens GN=CNP PE=1 SV=2	8	8	363.78	0.047668	0.452514	7.52896	0.537174	Cirrho	914.956	4370.6	4.77684	47948	0.0818117	379.277	0	3641.98	1463.94	4.462	15505.1	3687.45	10408.1	140.83	4701.96	0.050696	804.941	0	2752.11	517.19	4.19837	8402.15	2296.3	7972.14	326.926	3632.42	x
ILEU_HUMAN	Leukocyte elastase inhibitor OS=Homo sapiens GN=SERPINB1 PE=1 SV=1	3	3	123.58	0.0478669	0.452514	5.46487	0.536276	Control	518.89	100.931	0.194514	42829	95.5333	599.881	852.716	1217.53	91.2714	256.405	57.3213	184.577	65.0579	163.534	4.2613	59.1988	1273.13	329.015	920.046	32.245	241.256	31.0623	114.942	49.8316	379.631	3.29199	x
AT1A1_HUMAN	Sodium/potassium-transporting ATPase subunit alpha-1 OS=Homo sapiens GN=ATP1A1 PE=1 SV=1	15	15	834.93	0.0491702	0.452514	2.88065	0.530477	Cirrho	3531.98	6950.88	1.96799	114135	1407.9	760.938	10088.3	1399.43	5492.28	2043.05	25430.1	4755.57	10254	3664.91	6767.38	872.432	1614.94	3892.5	1057.5	1940.35	1922.34	13780.5	2961.45	7854.14	8507.81	5228.02	x
SDC4_HUMAN	Syndecan-4 OS=Homo sapiens GN=SDC4 PE=1 SV=2	2	2	108.15	0.051878	0.452514	21.26	0.518876	Cirrho	44.8444	613.935	13.6903	21628	6.22597	72.8579	38.9803	1.50176	0.0281921	149.472	98.3393	597.906	201.008	12.5124	3857.2	3.85803	154.626	15.0403	1.13483	0.00995988	140.641	53.2898	372.335	153.964	29.0465	2979.81	x
LTBP2_HUMAN	Latent-transforming growth factor beta-binding protein 2 OS=Homo sapiens GN=LTBP2 PE=1 SV=3	4	4	169.24	0.052418	0.452514	18.1612	0.516632	Cirrho	163.648	1887.85	11.536	204046	314.071	181.511	292.465	142.938	0	50.9071	4965.14	5687.99	3578.75	62.7661	565.636	194.619	385.22	112.846	108.013	0	47.8993	2690.6	3542.09	2741.17	145.707	436.972	x
AT1B1_HUMAN	Sodium/potassium-transporting ATPase subunit beta-1 OS=Homo sapiens GN=ATP1B1 PE=1 SV=1	3	3	117.31	0.0542511	0.452514	1.60963	0.509172	Control	627.562	424.684	0.67672	35438	842.105	522.53	213.268	77.8678	1801.68	307.927	1.40408	4.24703	156.457	1787.29	0	521.825	1108.97	82.288	58.8419	636.508	289.733	0.760866	2.64477	119.84	4149.07	0	x
S22A8_HUMAN	Solute carrier family 22 member 8 OS=Homo sapiens GN=SLC22A8 PE=1 SV=1	2	2	76.52	0.0543609	0.452514	7.11704	0.508733	Cirrho	33.2239	157.512	4.74092	60388	0	33.6512	0	82.9906	0	82.7015	33.1272	53.0814	29.5124	684.738	381.82	0	71.4179	0	62.713	0	77.8152	17.9516	33.0555	22.6052	1589.57	294.968	x
AQP7_HUMAN	Aquaporin-7 OS=Homo sapiens GN=AQP7 PE=1 SV=1	2	2	90.48	0.0549696	0.452514	7.6261	0.506314	Cirrho	245.835	1209.69	4.92074	37321	0	167.381	10.6269	974.23	0	322.771	1244.03	6026.39	1631.95	82.8241	388.609	0	355.233	4.10031	736.191	0	303.701	674.138	3752.83	1250.01	192.27	300.213	x
LFG3_HUMAN	Protein lifeguard 3 OS=Homo sapiens GN=TMBIM1 PE=1 SV=2	2	2	171.66	0.0555849	0.452514	2.12107	0.503895	Cirrho	3516.16	5942.21	1.68997	34927	325.492	931.215	1336.24	7089.19	1182.21	10232.6	11677.4	6900.86	9450.73	4275.83	4985.45	201.697	1976.32	515.581	5357.04	417.658	9628.06	6327.93	4297.39	7238.86	9926.03	3851.42	x
NGAL_HUMAN	Neutrophil gelatinase-associated lipocalin OS=Homo sapiens GN=LCN2 PE=1 SV=2	2	2	74.6	0.0592486	0.452514	6.25376	0.490007	Cirrho	158.517	620.163	3.91228	22745	0	872.367	9.16932	64.6023	0	4.96287	8.38668	1565.78	586.251	116.171	2680.05	0	1851.43	3.53792	48.8177	0	4.66964	4.54472	975.063	449.044	269.683	2070.42	x
VATB1_HUMAN	V-type proton ATPase subunit B, kidney isoform OS=Homo sapiens GN=ATP6V1B1 PE=1 SV=3	3	2	189.94	0.059728	0.452514	2.23103	0.488252	Cirrho	474.051	916.834	1.93404	57196	360.227	46.9326	473.359	21.3419	7.35234	1935.09	1118.41	567.325	2001.96	643.052	957.352	223.221	99.6052	182.643	16.1273	2.59748	1820.76	606.062	353.292	1533.42	1492.8	739.586	x
FRK_HUMAN	Tyrosine-protein kinase FRK OS=Homo sapiens GN=FRK PE=1 SV=1	4	4	189.52	0.0605774	0.452514	2.38742	0.485177	Control	562.837	332.47	0.590705	58673	1072.12	226.747	686.657	250.76	436.811	703.925	6.61488	38.686	78.5993	671.845	383.008	664.357	481.226	264.942	189.491	154.319	662.334	3.58459	24.091	60.2038	1559.64	295.886	x
VPS4B_HUMAN	Vacuolar protein sorting-associated protein 4B OS=Homo sapiens GN=VPS4B PE=1 SV=2	11	8	472.63	0.0607577	0.452514	3.4129	0.484529	Cirrho	752.845	1849.8	2.45708	49443	117.716	912.637	620.105	618.993	402.058	1845.56	4350.84	4021.33	2427.18	374.412	1673.16	72.9447	1936.89	239.264	467.751	142.042	1736.52	2357.71	2504.21	1859.12	869.169	1292.57	x
XPP2_HUMAN	Xaa-Pro aminopeptidase 2 OS=Homo sapiens GN=XPNPEP2 PE=2 SV=3	23	23	1268.78	0.0612886	0.452514	4.6586	0.482634	Cirrho	2917.52	9068.37	3.10825	76090	46.2158	916.364	1843.66	8153.13	2720.1	3825.63	20248	9757.79	7393.39	2073.68	28484.9	28.6384	1944.8	711.366	6161.03	960.975	3599.6	10972.3	6076.5	5663.02	4813.9	22005.5	x
SPB13_HUMAN	Serpin B13 OS=Homo sapiens GN=SERPINB13 PE=1 SV=2	7	7	354.84	0.0617522	0.452514	18.8257	0.480992	Control	3791.47	919.924	0.24263	44305	1661.77	13511.8	744.361	1155.48	29.6827	5645.74	333.561	102.283	44.6719	473.555	52.9225	1029.75	28676.1	287.207	873.157	10.4865	5312.17	180.756	63.6951	34.2168	1099.32	40.8843	x
BASI_HUMAN	Basigin OS=Homo sapiens GN=BSG PE=1 SV=2	4	4	144.13	0.0620637	0.452514	3.65281	0.479896	Cirrho	285.892	750.915	2.62657	42573	586.066	260.67	243	111.131	104.605	409.878	2802.51	406.13	1329.77	250.188	432.946	363.166	553.22	93.7599	83.978	36.9555	385.661	1518.67	252.91	1018.54	580.794	334.464	x
CATG_HUMAN	Cathepsin G OS=Homo sapiens GN=CTSG PE=1 SV=2	2	2	111.55	0.0624468	0.452514	30.425	0.478555	Cirrho	22.317	428.748	19.2117	29161	3.97331	35.8358	59.3504	0.148303	0	34.594	2.3842	2397.24	144.64	84.7046	765.999	2.46213	76.0544	22.9	0.112067	0	32.5501	1.29199	1492.84	110.788	196.635	591.759	x
STX3_HUMAN	Syntaxin-3 OS=Homo sapiens GN=STX3 PE=1 SV=3	7	7	304.16	0.0625935	0.452514	42.3254	0.478044	Cirrho	20.9234	553.494	26.4534	33134	0	100.003	0	25.5373	0	0	2903.14	258.652	1260.8	2.14612	3.21284	0	212.236	0	19.2976	0	0	1573.21	161.071	965.72	4.98205	2.48202	x
MYH9_HUMAN	Myosin-9 OS=Homo sapiens GN=MYH9 PE=1 SV=4	8	8	397.08	0.0628343	0.452514	3.46441	0.477207	Cirrho	135.006	341.17	2.52708	227646	0	42.2043	55.9491	294.381	3.49143	414.01	815.436	309.82	762.18	335.86	115.285	0	89.5704	21.5876	222.453	1.23348	389.549	441.883	192.935	583.798	779.675	89.0616	x
SLK_HUMAN	STE20-like serine/threonine-protein kinase OS=Homo sapiens GN=SLK PE=1 SV=1	2	2	110.85	0.0629936	0.452514	2.48008	0.476656	Cirrho	575.806	943.345	1.6383	143234	573.543	110.814	2616.04	25.322	119.706	9.40538	2426.78	1282.77	527.557	323.806	2579.3	355.406	235.18	1009.38	19.1349	42.2905	8.84967	1315.06	798.824	404.087	751.691	1992.59	x
CAN5_HUMAN	Calpain-5 OS=Homo sapiens GN=CAPN5 PE=1 SV=2	5	4	187.81	0.0640804	0.452514	3.60644	0.472928	Cirrho	224.647	542.118	2.4132	74092	0	164.924	11.033	615.472	404.205	152.251	627.487	779.06	711.306	1381.28	551.761	0	350.018	4.25702	465.09	142.8	143.255	340.034	485.146	544.831	3206.53	426.253	x
GTR5_HUMAN	Solute carrier family 2, facilitated glucose transporter member 5 OS=Homo sapiens GN=SLC2A5 PE=1 SV=1	8	6	395.86	0.0642377	0.452514	3.32011	0.472394	Cirrho	2155.26	5493.91	2.54907	55394	4508.21	1340.46	22.1061	868.474	761.149	5431.18	12403.6	8297.55	2396.72	5751.66	6929.05	2793.59	2844.86	8.5295	656.274	268.904	5110.28	6721.45	5167.16	1835.79	13352.1	5352.92	x
IDHC_HUMAN	Isocitrate dehydrogenase [NADP] cytoplasmic OS=Homo sapiens GN=IDH1 PE=1 SV=2	10	10	478.79	0.0648287	0.452514	4.24401	0.470398	Cirrho	855.669	2427.12	2.83652	46915	1408.69	2101.78	85.03	1120.57	11.1483	406.798	1258.29	3927.39	2139.47	1124.37	9707.84	872.917	4460.62	32.8083	846.773	3.93855	382.763	681.863	2445.72	1638.75	2610.15	7499.62	x
SAHH_HUMAN	Adenosylhomocysteinase OS=Homo sapiens GN=AHCY PE=1 SV=4	7	7	325.85	0.0657026	0.452514	5.27117	0.467481	Control	1500.68	263.958	0.175891	48255	310.047	4571.82	868.133	2571.33	249.1	433.672	224.617	458.366	520.52	83.0632	136.916	192.126	9702.79	334.964	1943.06	88.0037	408.049	121.72	285.439	398.697	192.825	105.772	x
TKFC_HUMAN;DHAK_HUMAN	Triokinase/FMN cyclase OS=Homo sapiens GN=TKFC PE=1 SV=2	9	9	467.04	0.0669927	0.452514	3.31809	0.463244	Cirrho	157.724	327.454	2.07612	59252	0	85.7056	0	857.541	0	3.09731	1596.45	118.73	837.799	47.0216	16.7174	0	181.893	0	648.013	0	2.91431	865.111	73.9373	641.719	109.157	12.9147	x
PGRP2_HUMAN	N-acetylmuramoyl-L-alanine amidase OS=Homo sapiens GN=PGLYRP2 PE=1 SV=1	8	8	433.68	0.067265	0.452514	3.17527	0.46236	Cirrho	1431.97	2866.67	2.00191	62748	16.7662	427.85	467.851	7301.31	284.408	93.6106	11860.1	4082.27	5188.45	1186.49	417.063	10.3894	908.026	180.518	5517.34	100.477	88.0798	6426.97	2542.16	3974.13	2754.36	322.195	x
ES8L2_HUMAN	Epidermal growth factor receptor kinase substrate 8-like protein 2 OS=Homo sapiens GN=EPS8L2 PE=1 SV=2	11	11	567.32	0.0680527	0.452514	5.60822	0.459824	Cirrho	1694.15	6063.76	3.57923	81197	663.412	153.184	515.987	7161.78	1665.72	4.83779	29706.8	4272.28	8547.59	721.853	4257.46	411.095	325.102	199.09	5411.9	588.475	4.55196	16098	2660.49	6547.1	1675.73	3289.03	x
DBNL_HUMAN	Drebrin-like protein OS=Homo sapiens GN=DBNL PE=1 SV=1	2	2	74.84	0.0683779	0.452514	35.0692	0.458786	Cirrho	0.978039	21.4369	21.9183	48463	0	5.86823	0	0	0	0	25.0964	0	101.767	44.632	0	0	12.4542	0	0	0	0	13.5997	0	77.9493	103.61	0	x
EF1A1_HUMAN	Elongation factor 1-alpha 1 OS=Homo sapiens GN=EEF1A1 PE=1 SV=1	10	10	456.97	0.0695122	0.452514	3.86505	0.455203	Cirrho	677.781	1738.97	2.56568	50451	1087.77	1463.94	620.022	554.085	308.543	32.322	5893.6	503.463	1593.05	1324.87	3783.31	674.055	3106.93	239.232	418.702	109.004	30.4123	3193.72	313.523	1220.21	3075.59	2922.73	x
PACN3_HUMAN	Protein kinase C and casein kinase substrate in neurons protein 3 OS=Homo sapiens GN=PACSIN3 PE=1 SV=2	4	4	199.01	0.070015	0.452514	4.92175	0.453634	Cirrho	172.606	564.294	3.26927	48799	26.0972	100.647	0	491.787	241.455	175.647	1760.07	757.012	1233.29	222.191	275.054	16.1716	213.603	0	371.626	85.303	165.269	953.777	471.416	944.646	515.799	212.488	x
VATH_HUMAN	V-type proton ATPase subunit H OS=Homo sapiens GN=ATP6V1H PE=1 SV=1	2	2	100.65	0.071113	0.452514	3.36722	0.450246	Cirrho	50.2571	135.692	2.69996	56417	23.8778	22.1671	0	0	26.8734	228.624	424.802	155.012	92.5081	18.9162	154.894	14.7963	47.0453	0	0	9.49401	215.116	230.199	96.5311	70.8574	43.9125	119.661	x
FCGBP_HUMAN	IgGFc-binding protein OS=Homo sapiens GN=FCGBP PE=1 SV=3	9	9	383.42	0.0712871	0.452514	7.91131	0.449714	Cirrho	127.818	663.136	5.18813	596443	126.681	53.8784	50.6291	354.464	0	181.255	141.952	188.501	1627.73	358.456	2739.4	78.5001	114.346	19.5349	267.856	0	170.546	76.9236	117.386	1246.78	832.129	2116.27	x
CRYAB_HUMAN	Alpha-crystallin B chain OS=Homo sapiens GN=CRYAB PE=1 SV=2	7	7	370.36	0.0718389	0.452514	4.59032	0.448037	Cirrho	72.6722	229.496	3.15796	20146	49.4764	183.027	49.8895	7.65111	0	145.989	555.771	252.298	56.0432	679.847	123.982	30.6589	388.438	19.2496	5.78167	0	137.364	301.171	157.114	42.9268	1578.22	95.7802	x
GNAS1_HUMAN	Guanine nucleotide-binding protein G(s) subunit alpha isoforms XLas OS=Homo sapiens GN=GNAS PE=1 SV=2	6	5	304.2	0.0719001	0.452514	2.5757	0.447851	Control	3301.43	1718.12	0.520417	111697	3015.01	568.902	2734.71	4589.7	4946.22	3954.02	1253.63	1644.86	2204	469.252	837.067	1868.3	1207.38	1055.17	3468.27	1747.43	3720.4	679.338	1024.3	1688.17	1089.33	646.661	x
SIAE_HUMAN	Sialate O-acetylesterase OS=Homo sapiens GN=SIAE PE=1 SV=1	3	3	136.68	0.0731837	0.452514	2.71401	0.444002	Cirrho	681.653	1217.3	1.78581	58961	263.948	933.575	1528.03	777.805	386.478	200.085	1419.87	2635.14	3746.66	1007.77	440.615	163.56	1981.33	589.581	587.759	136.537	188.263	769.425	1640.99	2869.78	2339.47	340.389	x
TPIS_HUMAN	Triosephosphate isomerase OS=Homo sapiens GN=TPI1 PE=1 SV=3	8	8	394.63	0.0732967	0.452514	5.19931	0.443667	Cirrho	989.228	3238.26	3.27352	31057	44.2894	412.724	75.0825	5194.52	58.3378	150.415	15708.5	1637.78	7423.01	142.915	804.315	27.4447	875.926	28.9701	3925.31	20.61	141.528	8512.38	1019.9	5685.72	331.767	621.359	x
VDAC1_HUMAN	Voltage-dependent anion-selective channel protein 1 OS=Homo sapiens GN=VDAC1 PE=1 SV=2	3	2	160.21	0.0740439	0.452514	2.30289	0.441462	Cirrho	1146.84	2014.03	1.75615	30868	284.257	648.299	384.905	639.642	3237.01	1686.94	3169.24	4622.47	2125.62	659.101	2628.82	176.145	1375.89	148.513	483.354	1143.59	1587.27	1717.4	2878.56	1628.13	1530.05	2030.85	x
AQP2_HUMAN	Aquaporin-2 OS=Homo sapiens GN=AQP2 PE=1 SV=1	5	5	185.5	0.0747861	0.452514	2.61803	0.439294	Control	5533.22	3544.48	0.640581	29047	11940.9	893.682	3532.72	3273.4	4030.75	9527.81	1531.3	653.961	535.984	7084.78	761.483	7399.41	1896.66	1363.08	2473.59	1424.01	8964.87	829.809	407.243	410.541	16446.8	588.27	x
AGRIN_HUMAN	Agrin OS=Homo sapiens GN=AGRN PE=1 SV=5	18	17	1020.01	0.0755705	0.452514	4.46494	0.437028	Cirrho	1890.55	5742.01	3.03721	225246	1793.09	472.772	2553.09	3705.71	56.5228	2762.15	9435.34	12287.1	16760.1	1290.84	2432.72	1111.12	1003.37	985.092	2800.27	19.9687	2598.95	5112.99	7651.55	12837.5	2996.58	1879.35	x
RHG18_HUMAN	Rho GTPase-activating protein 18 OS=Homo sapiens GN=ARHGAP18 PE=1 SV=3	2	2	92.74	0.0777265	0.452514	3.66518	0.430921	Cirrho	119.232	281.433	2.36037	75215	35.2783	25.7803	565.307	41.6698	0	47.3582	893.795	502.3	631.883	106.33	50.7323	21.8608	54.7136	218.12	31.4884	0	44.5601	484.345	312.798	483.996	246.837	39.1923	x
IFM1_HUMAN	Interferon-induced transmembrane protein 1 OS=Homo sapiens GN=IFITM1 PE=1 SV=3	2	2	175.14	0.0800073	0.452514	4.79493	0.424652	Cirrho	204.126	683.981	3.35078	14126	700.672	40.6933	0	275.567	88.0296	119.793	2676.47	534.32	391.715	182.218	1109.12	434.184	86.3636	0	208.236	31.0997	112.716	1450.37	332.738	300.037	423.006	856.833	x
PEDF_HUMAN	Pigment epithelium-derived factor OS=Homo sapiens GN=SERPINF1 PE=1 SV=4	6	6	261.11	0.0800729	0.452514	1.78466	0.424474	Cirrho	579.154	759.397	1.31122	46454	671.258	435.092	798.815	900.184	236.141	433.432	1177.3	1871.96	625.906	886.666	606.13	415.956	923.397	308.218	680.237	83.4254	407.823	637.977	1165.73	479.418	2058.33	468.255	x
VP37D_HUMAN	Vacuolar protein sorting-associated protein 37D OS=Homo sapiens GN=VPS37D PE=1 SV=2	4	4	141.1	0.0805297	0.452514	9.99192	0.423242	Cirrho	285.522	1817.54	6.36568	27941	257.654	355.813	298.233	539.414	221.974	40.0428	9340.84	2212.53	2339.72	198.426	173.029	159.66	755.143	115.071	407.615	78.4205	37.6769	5061.78	1377.82	1792.13	460.631	133.671	x
GPX4_HUMAN	Phospholipid hydroperoxide glutathione peroxidase, mitochondrial OS=Homo sapiens GN=GPX4 PE=1 SV=3	2	2	66.9	0.0809787	0.452514	2.70394	0.422038	Cirrho	161.769	300.107	1.85515	22674	0	31.9748	0	711.43	0	227.212	1187.49	20.3001	248.085	205.882	525.317	0	67.8603	0	537.602	0	213.787	643.496	12.6415	190.023	477.94	405.824	x
LYN_HUMAN	Tyrosine-protein kinase Lyn OS=Homo sapiens GN=LYN PE=1 SV=3	2	2	144.08	0.0814064	0.452514	4.85083	0.420898	Cirrho	69.3761	250.518	3.611	58993	30.8184	16.3713	0	40.8529	10.9543	317.26	11.7744	752.282	214.091	535.917	168.593	19.0971	34.7449	0	30.8711	3.87	298.515	6.3805	468.47	163.985	1244.09	130.244	x
ROBO4_HUMAN	Roundabout homolog 4 OS=Homo sapiens GN=ROBO4 PE=1 SV=1	3	3	129.41	0.0814967	0.452514	4.44219	0.420658	Cirrho	1699.27	4722.29	2.779	108417	21.0735	622.687	233.433	9254.15	64.31	0	8776.41	19433.3	8843.08	238.942	450.775	13.0585	1321.53	90.0686	6993.03	22.7199	0	4755.92	12101.8	6773.43	554.685	348.238	x
4F2_HUMAN	4F2 cell-surface antigen heavy chain OS=Homo sapiens GN=SLC3A2 PE=1 SV=3	10	9	586.96	0.0819352	0.452514	1.95817	0.419497	Cirrho	748.647	961.084	1.28376	68180	29.1851	2238.38	0	1862.23	0	362.085	1383.93	1505.9	933.767	1557.79	1948.51	18.085	4750.51	0	1407.22	0	340.692	749.946	937.772	715.227	3616.3	1505.29	x
IGJ_HUMAN	Immunoglobulin J chain OS=Homo sapiens GN=IGJ PE=1 SV=4	8	7	326.4	0.0881177	0.483393	3.0766	0.403798	Cirrho	7059.31	13827.1	1.95871	18543	372.089	4710.3	5812.42	29541.5	22.2596	1897.31	57685.4	16725.5	10573.1	4092.67	19516.9	230.571	9996.68	2242.68	22323.4	7.86403	1785.21	31259.5	10415.5	8098.54	9500.82	15077.4	x
CO3_HUMAN	Complement C3 OS=Homo sapiens GN=C3 PE=1 SV=2	42	42	2461.39	0.0893182	0.484062	7.83802	0.400886	Cirrho	2703.2	13401.7	4.95772	188569	17.2273	2545.02	4003.86	7376.05	1494.24	782.783	8247.1	50578.1	42525.8	1689.05	2898.49	10.6752	5401.3	1544.86	5573.82	527.895	736.533	4469.08	31496.6	32573	3921.01	2239.18	x
PSA3_HUMAN	Proteasome subunit alpha type-3 OS=Homo sapiens GN=PSMA3 PE=1 SV=2	2	2	126.63	0.0894241	0.484062	1.83644	0.400632	Cirrho	198.246	250.641	1.2643	28643	10.1986	28.4803	735.646	185.494	63.9936	165.662	235.149	475.631	284.184	211.551	613.813	6.31973	60.4437	283.844	140.171	22.6081	155.874	127.427	296.191	217.673	491.1	474.19	x
DNAS1_HUMAN	Deoxyribonuclease-1 OS=Homo sapiens GN=DNASE1 PE=1 SV=1	4	4	246.09	0.0910783	0.484228	10.1773	0.396693	Control	7033.47	1828.74	0.260006	31642	7002.99	4441.02	59.1781	23185.6	396.95	7115.09	48.1598	55.1776	129.483	2626.76	595.905	4339.53	9425.18	22.8335	17520.5	140.237	6694.7	26.0977	34.3609	99.1789	6097.82	460.356	x
PRDX6_HUMAN	Peroxiredoxin-6 OS=Homo sapiens GN=PRDX6 PE=1 SV=3	8	8	315.65	0.0922736	0.486597	2.80746	0.393896	Control	3140.82	1983.13	0.631404	25133	2122.24	1243.75	3812.72	706.634	2307.3	8652.31	341.821	1756.18	2299.6	945.406	250.706	1315.08	2639.61	1471.11	533.978	815.139	8141.1	185.232	1093.63	1761.4	2194.69	193.678	x
GLNA_HUMAN	Glutamine synthetase OS=Homo sapiens GN=GLUL PE=1 SV=4	2	2	122.99	0.0948083	0.494536	1.99988	0.388092	Control	1020.47	648.878	0.635859	42665	2689.03	897.362	508.074	10.9609	1573.85	443.561	27.8011	2453.11	4.59297	65.8373	0	1666.3	1904.47	196.037	8.28279	556.021	417.354	15.0653	1527.63	3.51802	152.836	0	x
A2ML1_HUMAN	Alpha-2-macroglobulin-like protein 1 OS=Homo sapiens GN=A2ML1 PE=1 SV=3	19	18	764.09	0.0952629	0.494536	5.82234	0.387069	Control	1185.96	177.574	0.14973	162430	293.017	3918.2	2219.88	224.761	361.064	98.8421	45.8327	93.0207	3.74395	530.831	345.029	181.573	8315.61	856.527	169.844	127.559	93.0021	24.8366	57.927	2.86771	1232.28	266.546	x
GRB2_HUMAN	Growth factor receptor-bound protein 2 OS=Homo sapiens GN=GRB2 PE=1 SV=1	2	2	59.14	0.0955943	0.494536	2.01468	0.386327	Control	1759.44	976.21	0.554841	25304	2135.14	669.143	1978.52	2140.86	2209.33	1423.65	84.5404	1325.63	869.801	898.096	1188.47	1323.07	1420.12	763.399	1617.77	780.527	1339.54	45.8122	825.515	666.231	2084.86	918.133	x
S13A3_HUMAN	Solute carrier family 13 member 3 OS=Homo sapiens GN=SLC13A3 PE=1 SV=1	2	2	83.01	0.0974945	0.496667	2.84222	0.382124	Cirrho	76.7717	181.691	2.36664	67197	4.20668	21.5524	3.5877	6.96294	66.9481	357.372	20.329	302.938	446.383	35.1001	286.26	2.60674	45.7408	1.38429	5.26164	23.6519	336.257	11.0162	188.65	341.911	81.4822	221.145	x
PRSS8_HUMAN	Prostasin OS=Homo sapiens GN=PRSS8 PE=1 SV=1	2	2	168.31	0.0980755	0.496667	1.83229	0.380857	Control	2284.49	1406.86	0.61583	37093	2260.3	947.996	2558.05	2295.51	2878.14	2766.93	112.396	2366.37	2081.86	425.139	1248.19	1400.64	2011.93	987.006	1734.64	1016.81	2603.45	60.9068	1473.62	1594.62	986.929	964.266	x
IGHA1_HUMAN	Ig alpha-1 chain C region OS=Homo sapiens GN=IGHA1 PE=1 SV=2	13	6	961.48	0.0993512	0.496667	2.69986	0.378104	Cirrho	124726	224990	1.80388	38486	3726.59	56601.3	43625	366645	250918	26839.6	583869	508038	283492	47580.7	260735	2309.25	120125	16832.4	277061	88645.8	25253.8	316397	316372	217143	110455	201426	x
MUC5B_HUMAN	Mucin-5B OS=Homo sapiens GN=MUC5B PE=1 SV=3	20	20	1104.71	0.100219	0.496667	10.6855	0.376253	Cirrho	1544.25	10324.4	6.68567	611584	57.4644	1051.9	2792.46	5272.94	54.3021	36.4488	66818.1	11907	667.51	533.243	2579.93	35.6088	2232.45	1077.45	3984.57	19.1842	34.2953	36208.6	7414.89	511.285	1237.88	1993.08	x
FGL2_HUMAN	Fibroleukin OS=Homo sapiens GN=FGL2 PE=1 SV=1	5	5	171.72	0.1008	0.496667	2.90648	0.375025	Cirrho	159.783	291.8	1.82623	50824	0	205.028	0	737.548	4.75744	11.3643	138.082	1597.56	460.754	106.538	19.0924	0	435.131	0	557.338	1.68074	10.6929	74.8264	994.853	352.918	247.321	14.7495	x
S23A1_HUMAN	Solute carrier family 23 member 1 OS=Homo sapiens GN=SLC23A1 PE=1 SV=3	10	10	346.33	0.101634	0.496667	13.5396	0.373274	Cirrho	93.4291	812.45	8.69589	65644	0	257.707	114.76	2.51316	0	185.595	2477.2	1419.2	84.3542	2340.39	3.82825	0	546.931	44.2794	1.89911	0	174.629	1342.39	883.78	64.6118	5433.04	2.95745	x
ACE2_HUMAN	Angiotensin-converting enzyme 2 OS=Homo sapiens GN=ACE2 PE=1 SV=2	7	7	328.28	0.102171	0.496667	4.63228	0.372155	Cirrho	301.47	897.405	2.97677	92860	24.1963	131.945	81.1758	1374.13	6.65379	190.718	3581.84	1957.25	1079.3	41.981	322.092	14.9937	280.026	31.3212	1038.38	2.35069	179.449	1940.99	1218.84	826.696	97.4558	248.826	x
PDCD6_HUMAN	Programmed cell death protein 6 OS=Homo sapiens GN=PDCD6 PE=1 SV=1	4	3	187.87	0.102695	0.496667	7.81483	0.37107	Cirrho	73.3461	368.238	5.02056	21912	0	272.939	0	82.1406	0	84.9964	524.389	128.31	386.679	1823.6	2.95855	0	579.26	0	62.0707	0	79.9745	284.165	79.9027	296.18	4233.34	2.28557	x
ALBU_HUMAN	Serum albumin OS=Homo sapiens GN=ALB PE=1 SV=2	41	40	2616.48	0.104184	0.496667	2.09121	0.368018	Cirrho	90545.1	132164	1.45965	71317	204.753	9491.26	66215.8	158143	307172	2044.46	408962	96344.1	166387	78506.1	196546	126.879	20143.3	25549	119503	108520	1923.66	221616	59996.6	127446	182246	151838	x
SC5A2_HUMAN	Sodium/glucose cotransporter 2 OS=Homo sapiens GN=SLC5A2 PE=1 SV=1	4	4	280.11	0.105625	0.496667	8.08532	0.365112	Cirrho	660.443	3494.55	5.29122	73932	914.972	165.328	660.885	501.239	1580.3	139.936	8285.37	7610.49	5599.64	63.4972	5140.45	566.978	350.876	254.998	378.769	558.298	131.668	4489.82	4739.3	4289.09	147.404	3971.17	x
PROM1_HUMAN	Prominin-1 OS=Homo sapiens GN=PROM1 PE=1 SV=1	20	20	1430.86	0.106198	0.496667	2.45119	0.363969	Cirrho	5083.1	8808.98	1.73299	98395	39.4799	3350.07	1630.66	10335.8	10378.6	4764.08	17571.9	14262.8	11924.4	8388.74	10150.4	24.4644	7109.86	629.181	7810.35	3666.61	4482.6	9522.16	8881.88	9133.62	19473.8	7841.48	x
LV301_HUMAN	Ig lambda chain V-III region SH OS=Homo sapiens PE=1 SV=1	2	2	137.76	0.107188	0.496667	2.93346	0.36201	Cirrho	2960.27	5732.22	1.93638	11500	2145.72	9268.8	2216.57	2895.16	90.9078	1144.47	11612.2	16572.6	10527.3	1913.13	2793.97	1329.63	19671.2	855.249	2187.77	32.1165	1076.85	6292.62	10320.3	8063.46	4441.18	2158.43	x
CO6A3_HUMAN	Collagen alpha-3(VI) chain OS=Homo sapiens GN=COL6A3 PE=1 SV=5	5	5	260.01	0.107552	0.496667	2.66725	0.361295	Control	1633	757.3	0.463749	345167	2373.37	2587.01	1951.21	307.133	1532.2	1047.05	16.6265	335.251	784.659	814.796	1109.87	1470.7	5490.42	752.863	232.089	541.307	985.189	9.00985	208.772	601.016	1891.49	857.412	x
MITD1_HUMAN	MIT domain-containing protein 1 OS=Homo sapiens GN=MITD1 PE=1 SV=1	4	4	272.65	0.10801	0.496667	3.06473	0.360399	Cirrho	2074.35	4348.93	2.09653	29638	48.6807	806.237	110.607	5290.2	4849.85	1340.51	13519.6	2647.22	12132	1276.23	2211.5	30.1658	1711.08	42.677	3997.61	1713.39	1261.31	7326.22	1648.51	9292.63	2962.68	1708.45	x
CPVL_HUMAN	Probable serine carboxypeptidase CPVL OS=Homo sapiens GN=CPVL PE=1 SV=2	6	6	380.05	0.1108	0.496667	1.94621	0.355031	Cirrho	3599.38	4944.34	1.37366	54414	1507.77	2117.98	1097.23	12206	1355.94	3311.33	8354.93	13050.2	8043.27	3407.68	2169.56	934.317	4495	423.361	9223.65	479.036	3115.69	4527.51	8126.8	6160.81	7910.67	1676.06	x
RARR2_HUMAN	Retinoic acid receptor responder protein 2 OS=Homo sapiens GN=RARRES2 PE=1 SV=1	2	2	95.67	0.111048	0.496667	6.47637	0.354562	Cirrho	397.008	1611.75	4.05974	18948	3.27724	1976.88	11.7822	351.736	0	38.3705	426.548	372.166	11805.6	189.846	61.6487	2.0308	4195.54	4.54607	265.794	0	36.1034	231.145	231.76	9042.62	440.713	47.6256	x
A2GL_HUMAN;DDX24_HUMAN	Leucine-rich alpha-2-glycoprotein OS=Homo sapiens GN=LRG1 PE=1 SV=2	5	4	214.93	0.111086	0.496667	7.42005	0.354489	Cirrho	312.253	1612.86	5.16523	38382	4.00862	278.204	0	181.121	18.9587	1391.22	2233.37	1817.09	251.06	18.3385	7264.8	2.48401	590.433	0	136.867	6.69784	1309.03	1210.26	1131.56	192.301	42.5714	5612.29	x
GLYC_HUMAN	Serine hydroxymethyltransferase, cytosolic OS=Homo sapiens GN=SHMT1 PE=1 SV=1	10	10	529.58	0.115275	0.508707	1.89965	0.346734	Cirrho	800.483	1002.43	1.25228	53619	0	1008.92	117.169	3221.5	20.7368	434.569	1175.78	997.148	3073.82	1530.29	826.158	0	2141.24	45.2089	2434.37	7.32605	408.893	637.15	620.957	2354.42	3552.46	638.234	x
TPP1_HUMAN	Tripeptidyl-peptidase 1 OS=Homo sapiens GN=TPP1 PE=1 SV=2	4	4	213.3	0.115995	0.508707	3.20402	0.345436	Cirrho	2157.27	4530.85	2.10027	61723	24.9747	5734.96	0.646784	3868.07	2463.16	851.79	9123.56	15811.5	2344.71	2297.34	4982.61	15.476	12171.3	0.249558	2922.96	870.201	801.463	4944.04	9846.32	1795.95	5333.11	3849.22	x
LMBD1_HUMAN	Probable lysosomal cobalamin transporter OS=Homo sapiens GN=LMBRD1 PE=1 SV=1	3	3	159.65	0.116393	0.508707	2.77873	0.34472	Cirrho	983.291	1941.55	1.97454	61976	18.3761	663.755	50.3673	766.949	3881.39	518.905	3711.38	3387.8	5535.85	499.136	527.343	11.387	1408.69	19.4339	579.556	1371.24	488.246	2011.19	2109.69	4240.23	1158.71	407.39	x
CO9_HUMAN	Complement component C9 OS=Homo sapiens GN=C9 PE=1 SV=2	7	7	283.14	0.117223	0.508707	1.20912	0.343238	Cirrho	294.633	225.039	0.763795	64615	0	355.541	0	1391.97	0	20.2825	343.304	840.957	499.436	39.7256	57.8068	0	754.566	0	1051.86	0	19.0841	186.035	523.691	382.547	92.2201	44.6576	x
SODE_HUMAN	Extracellular superoxide dismutase [Cu-Zn] OS=Homo sapiens GN=SOD3 PE=1 SV=2	6	6	307.3	0.118548	0.509257	4.79468	0.340897	Cirrho	3059.7	9919.21	3.24189	26291	2703.48	1209.28	285.152	6155.47	5453.68	2551.12	35912.3	16952.6	13225.1	695.613	6565.65	1675.26	2566.45	110.024	4651.47	1926.71	2400.39	19460.8	10557	10129.9	1614.81	5072.17	x
PLCD1_HUMAN	1-phosphatidylinositol 4,5-bisphosphate phosphodiesterase delta-1 OS=Homo sapiens GN=PLCD1 PE=1 SV=2	3	3	253.96	0.119	0.509257	5.03159	0.340106	Cirrho	298.522	1059.69	3.54979	86352	31.5195	61.2406	34.1017	438.556	349.741	875.974	2124.19	3678.63	1453.1	101.798	152.489	19.5316	129.971	13.1579	331.401	123.559	824.218	1151.1	2290.8	1113.02	236.315	117.803	x
DPEP1_HUMAN	Dipeptidase 1 OS=Homo sapiens GN=DPEP1 PE=1 SV=3	17	17	1066.61	0.119689	0.509539	1.56177	0.338905	Cirrho	17434.5	19810.5	1.13628	46101	10829.6	9710.18	37015.1	14877	24921.6	7253.59	31616.1	34996.7	28092.4	12671.7	28767.2	6710.75	20607.9	14282	11242	8804.49	6825.02	17132.7	21793.6	21517.6	29416.5	22223.6	x
CD63_HUMAN	CD63 antigen OS=Homo sapiens GN=CD63 PE=1 SV=2	4	4	171.17	0.121257	0.513502	5.45359	0.336204	Control	9520.99	6138.39	0.644721	26474	4431.92	5558.15	2436.85	242.807	7143.78	37312.4	518.064	203.242	133.298	4456.74	3417.75	2746.31	11796.1	940.245	183.481	2523.8	35107.9	280.738	126.565	102.101	10346	2640.32	x
IGKC_HUMAN	Ig kappa chain C region OS=Homo sapiens GN=IGKC PE=1 SV=1	10	10	992.48	0.12215	0.513502	2.01343	0.334683	Cirrho	164175	248200	1.51179	11773	14120.4	65796.5	109361	264634	298981	232160	414411	517112	171997	152321	396937	8749.95	139640	42196.3	199974	105626	218443	224568	322023	131742	353601	306647	x
KLK3_HUMAN	Prostate-specific antigen OS=Homo sapiens GN=KLK3 PE=1 SV=2	3	3	125.1	0.123441	0.513502	2.92152	0.332509	Cirrho	1205.35	3016.27	2.50239	29293	0	103.223	7.45205	179.089	15.9129	6926.45	13748.2	167.203	3313.47	176.327	202.149	0	219.071	2.87533	135.331	5.6218	6517.21	7450.09	104.123	2537.98	409.329	156.167	x
MIF_HUMAN	Macrophage migration inhibitory factor OS=Homo sapiens GN=MIF PE=1 SV=4	3	3	169.59	0.12495	0.513502	2.101	0.329998	Cirrho	1159.08	1845.94	1.59258	12639	58.0484	1455.2	1533.01	707.654	776.264	2424.33	4413.98	1451.51	2015.04	1291.78	3003.88	35.9707	3088.37	591.501	534.749	274.244	2281.09	2391.93	903.9	1543.44	2998.78	2320.59	x
A1AT_HUMAN	Alpha-1-antitrypsin OS=Homo sapiens GN=SERPINA1 PE=1 SV=3	18	18	1286.24	0.124958	0.513502	1.84375	0.329984	Control	20828.6	9448.67	0.45364	46878	15192.1	57727.6	3276.15	34860.4	5788.94	8126.15	1861.27	1462.82	3062.44	49041.6	1055.96	9414.03	122515	1264.08	26342.8	2045.16	7646.02	1008.62	910.943	2345.7	113847	815.761	x
PAPP2_HUMAN	Pappalysin-2 OS=Homo sapiens GN=PAPPA2 PE=1 SV=4	10	10	418.54	0.125547	0.513502	1.50375	0.329015	Cirrho	1863.5	1751.4	0.939844	203486	0	0	2726.44	8454.58	0	0	4141.13	7231.69	2534.61	13.6783	90.0989	0	0	1051.98	6388.82	0	0	2244.07	4503.41	1941.41	31.7531	69.6043	x
SDCB1_HUMAN	Syntenin-1 OS=Homo sapiens GN=SDCBP PE=1 SV=1	15	15	834.84	0.126516	0.513502	2.59479	0.327431	Cirrho	2523.88	4564.26	1.80843	32595	12.1928	1813.31	926.596	5365.51	4847.94	2177.74	10153.2	2900.05	7414.49	4224.24	8052.76	7.55549	3848.39	357.521	4054.52	1712.71	2049.07	5502	1805.96	5679.19	9806.26	6221.02	x
IGHG4_HUMAN	Ig gamma-4 chain C region OS=Homo sapiens GN=IGHG4 PE=1 SV=1	9	3	565.19	0.128055	0.513502	10.3979	0.324944	Cirrho	380.675	2489.3	6.53917	36431	0	241.434	26.5516	1871.32	21.9757	122.775	725.867	270.665	457.555	18274.2	62.8415	0	512.395	10.2448	1414.09	7.76373	115.521	393.345	168.552	350.468	42422.2	48.5471	x
CDHR2_HUMAN	Cadherin-related family member 2 OS=Homo sapiens GN=CDHR2 PE=1 SV=2	2	2	73.16	0.129286	0.515493	2.51635	0.322979	Cirrho	105.376	181.968	1.72684	142139	49.4071	319.718	0	69.0142	141.818	52.299	403.076	95.2289	190.554	429.987	206.972	30.6159	678.539	0	52.1515	50.1024	49.209	218.426	59.3021	145.956	998.184	159.892	x
RADI_HUMAN	Radixin OS=Homo sapiens GN=RDX PE=1 SV=1	14	7	687.27	0.130314	0.517069	1.8063	0.321355	Cirrho	1220.03	1678.35	1.37566	68635	2481.98	516.586	1813.72	767.059	1306.74	434.106	929.824	4278.27	2440.11	1374.91	1995.59	1538	1096.35	699.813	579.638	461.653	408.457	503.869	2664.22	1869.02	3191.75	1541.65	x
SPAST_HUMAN	Spastin OS=Homo sapiens GN=SPAST PE=1 SV=1	2	2	132.07	0.133929	0.522937	2.33949	0.315764	Cirrho	35.7084	52.4613	1.46916	67497	3.21514	9.22983	0	201.805	0	0	83.9324	65.5753	68.3651	0	199.825	1.99232	19.5885	0	152.497	0	0	45.4827	40.8359	52.3648	0	154.371	x
LDHB_HUMAN	L-lactate dehydrogenase B chain OS=Homo sapiens GN=LDHB PE=1 SV=2	16	14	975.82	0.137779	0.530485	1.56585	0.310001	Cirrho	6082.24	7324.63	1.20426	36900	9001.69	4252.19	6641.99	5884.95	7964.23	2748.41	12636.1	11705.1	5505.9	5149.52	12622.7	5578.05	9024.44	2562.77	4447.04	2813.66	2586.02	6847.46	7289.14	4217.29	11954.2	9751.46	x
FRIL_HUMAN	Ferritin light chain OS=Homo sapiens GN=FTL PE=1 SV=2	2	2	139.22	0.140145	0.530485	8.65201	0.306554	Cirrho	76.4456	419.324	5.48526	20064	16.0457	118.065	0	246.73	60.6325	17.2011	7.54847	186.458	142.334	1760.25	1210.45	9.94297	250.569	0	186.445	21.4206	16.1848	4.09049	116.113	109.022	4086.3	935.111	x
VTNC_HUMAN	Vitronectin OS=Homo sapiens GN=VTN PE=1 SV=1	13	13	788.9	0.140422	0.530485	3.14407	0.306155	Cirrho	7652.7	15750.3	2.05813	55069	1005	15671.7	7759.85	14487.3	2557.71	4434.63	25666.3	37151.9	47064.9	2755.79	7664.41	622.769	33260.1	2994.09	10947.5	903.605	4172.61	13908.5	23135.7	36049.7	6397.35	5921	x
QPCT_HUMAN	Glutaminyl-peptide cyclotransferase OS=Homo sapiens GN=QPCT PE=1 SV=1	2	2	119.59	0.141178	0.530485	2.23336	0.305071	Control	470.017	177.092	0.376777	40965	7.61212	266.966	600.641	1311.53	401.917	231.433	0	422.553	607.236	22.4776	0	4.71698	566.583	231.754	991.079	141.992	217.759	0	263.137	465.117	52.1801	0	x
A2MG_HUMAN	Alpha-2-macroglobulin OS=Homo sapiens GN=A2M PE=1 SV=3	34	33	1759.14	0.141271	0.530485	1.93505	0.304939	Cirrho	2619.85	3574.87	1.36454	164613	423.756	2104.08	4196.83	3108.54	4338.36	1547.49	2258.36	9932.23	4045.16	6353.3	2758.58	262.588	4465.5	1619.32	2349.01	1532.69	1456.06	1223.8	6185.12	3098.42	14748.7	2131.09	x
SAMP_HUMAN	Serum amyloid P-component OS=Homo sapiens GN=APCS PE=1 SV=2	2	2	121.67	0.141484	0.530485	5.57608	0.304635	Cirrho	974.997	3703.67	3.79864	25485	843.02	125.211	241.662	1181.13	2264.98	1193.97	6500.06	6830.01	3096.72	113.609	10642.9	522.392	265.735	93.2436	892.538	800.188	1123.43	3522.36	4253.27	2371.96	263.734	8222	x
IGHG3_HUMAN	Ig gamma-3 chain C region OS=Homo sapiens GN=IGHG3 PE=1 SV=2	10	3	510.98	0.144573	0.539594	5.60171	0.300287	Cirrho	3490.69	12325.7	3.53102	42287	0	2907.24	3479.65	12249.4	2272.17	35.6993	10451.7	71245.1	12393.7	1498.48	2180.05	0	6170.04	1342.6	9256.4	802.727	33.5901	5663.75	44366.6	9493.07	3478.61	1684.16	x
BCAS1_HUMAN	Breast carcinoma-amplified sequence 1 OS=Homo sapiens GN=BCAS1 PE=1 SV=2	2	2	76.42	0.145762	0.541557	7.91702	0.298644	Cirrho	27.295	135.195	4.9531	61957	0	9.25279	111.152	40.2986	3.06695	0	33.4612	247.771	780.331	16.3236	2.58865	0	19.6372	42.8872	30.4522	1.08351	0	18.1326	154.295	597.701	37.894	1.99982	x
C1TC_HUMAN	C-1-tetrahydrofolate synthase, cytoplasmic OS=Homo sapiens GN=MTHFD1 PE=1 SV=3	2	2	86.46	0.147596	0.541683	1.4025	0.29614	Cirrho	177.432	165.078	0.930371	102180	0	758.085	0	225.334	0	81.1738	61.2056	51.6018	77.9682	391.831	661.637	0	1608.89	0	170.276	0	76.3777	33.1671	32.1341	59.7204	909.606	511.136	x
PIGR_HUMAN	Polymeric immunoglobulin receptor OS=Homo sapiens GN=PIGR PE=1 SV=4	30	27	1937.81	0.14916	0.541683	1.83524	0.294033	Cirrho	29815.8	37623.7	1.26187	84429	3732.64	5880.36	81265.9	23158.9	61165.2	3691.43	81502.8	70771.8	53665.7	10319.6	57334.8	2313	12479.9	31355.9	17500.4	21608.9	3473.33	44166.2	44071.9	41105.7	23956.1	44293	x
ITIH1_HUMAN	Inter-alpha-trypsin inhibitor heavy chain H1 OS=Homo sapiens GN=ITIH1 PE=1 SV=3	5	4	267.5	0.14979	0.541683	3.33571	0.293193	Cirrho	113.243	260.16	2.29736	101782	36.1176	462.491	0	0	0	180.851	88.6466	1598.11	12.5898	63.9249	125.459	22.3809	981.544	0	0	0	170.166	48.0374	995.197	9.64327	148.397	96.9211	x
NPHN_HUMAN	Nephrin OS=Homo sapiens GN=NPHS1 PE=1 SV=1	2	2	73.53	0.149993	0.541683	569.671	0.292924	Cirrho	0.0261897	9.33162	356.309	135799	0	0	0	0	0.157138	0	0	4.03335	70.5641	0	0	0	0	0	0	0.0555148	0	0	2.5117	54.0492	0	0	x
STOM_HUMAN	Erythrocyte band 7 integral membrane protein OS=Homo sapiens GN=STOM PE=1 SV=3	12	12	674.03	0.150435	0.541683	2.37805	0.292337	Cirrho	3659.86	6329.88	1.72954	31882	189.169	492.251	7606.51	820.436	8655.83	4194.97	3381.85	4798.14	25914.5	2437.25	6984.97	117.222	1044.7	2934.92	619.974	3057.99	3947.12	1832.61	2987.96	19849.4	5657.9	5396.11	x
GSTM3_HUMAN	Glutathione S-transferase Mu 3 OS=Homo sapiens GN=GSTM3 PE=1 SV=3	4	4	173.26	0.152192	0.542217	7.74837	0.290027	Control	908.448	467.646	0.514774	26998	810.054	608.22	1019.85	188.141	7.76044	2816.66	36.4242	0	159.802	215.773	174.219	501.964	1290.83	393.504	142.171	2.74166	2650.24	19.7382	0	122.402	500.901	134.59	x
IGHG1_HUMAN	Ig gamma-1 chain C region OS=Homo sapiens GN=IGHG1 PE=1 SV=1	12	4	886.95	0.154806	0.542217	1.69953	0.28665	Cirrho	52080.5	61549.7	1.18182	36596	1636.86	39545.4	16712.5	125395	123780	5412.65	133775	36735.7	125137	106953	39960.1	1014.31	83927.3	6448.42	94756.8	43729.8	5092.85	72492.4	22876.5	95849.6	248283	30870.5	x
IGHA2_HUMAN	Ig alpha-2 chain C region OS=Homo sapiens GN=IGHA2 PE=1 SV=3	10	3	652.72	0.155164	0.542217	2.49901	0.286193	Cirrho	11263.2	19305.6	1.71405	37301	611.875	6117.89	1156.47	28531.9	27206.6	3954.29	52298.1	41518.1	4890.67	5420.36	36606.4	379.159	12984	446.217	21560.5	9611.72	3720.66	28340.2	25854.7	3746.05	12583	28279.6	x
GBB1_HUMAN	Guanine nucleotide-binding protein G(I)/G(S)/G(T) subunit beta-1 OS=Homo sapiens GN=GNB1 PE=1 SV=3	8	4	392.75	0.156466	0.542217	2.74127	0.284541	Control	3344.18	1931.54	0.577582	38151	4018.01	610.319	6319.01	1077.44	1195.39	6844.89	237.375	2019.54	1187.7	410.011	2245.05	2489.83	1295.28	2438.15	814.18	422.316	6440.47	128.633	1257.63	909.73	951.81	1734.38	x
NEP_HUMAN	Neprilysin OS=Homo sapiens GN=MME PE=1 SV=2	33	33	1906.62	0.158004	0.542217	1.532	0.282613	Cirrho	5918.13	8195.15	1.38475	86144	8323.63	1924.22	2497.49	2396.02	6966.55	13400.9	5593.04	8628.13	15272.2	5736.88	10102.8	5157.88	4083.78	963.641	1810.59	2461.19	12609.1	3030.86	5373.02	11697.9	13317.7	7804.71	x
CPNE3_HUMAN	Copine-3 OS=Homo sapiens GN=CPNE3 PE=1 SV=1	9	8	434.18	0.158536	0.542217	2.98326	0.28195	Cirrho	1768.78	3443.79	1.94698	60947	657.16	821.07	5451.48	1658.88	1948.74	75.3654	10286.8	5132.57	8777.1	1632.14	555.074	407.221	1742.56	2103.42	1253.56	688.463	70.9126	5574.4	3196.22	6722.89	3788.88	428.812	x
ALDOB_HUMAN	Fructose-bisphosphate aldolase B OS=Homo sapiens GN=ALDOB PE=1 SV=2	17	15	1293.37	0.158609	0.542217	1.78567	0.281861	Control	9386.37	4539.24	0.483599	39961	6239.82	11951.3	11866.9	12845.9	10987.9	2426.33	9509.8	7210.57	3407.63	2338.42	3816.03	3866.61	25364.4	4578.75	9707.21	3881.89	2282.97	5153.34	4490.26	2610.1	5428.48	2948	x
EZRI_HUMAN;CROCC_HUMAN	Ezrin OS=Homo sapiens GN=EZR PE=1 SV=4	30	22	1532.85	0.159426	0.542217	3.53794	0.280849	Cirrho	1780.37	4083.53	2.29364	69484	387.169	3201.67	3379.01	2689.74	50.9117	973.695	17416.4	4012.25	7808.04	1519.37	738.038	239.916	6794.91	1303.77	2032.54	17.9864	916.165	9437.92	2498.56	5980.63	3527.11	570.158	x
MARCS_HUMAN	Myristoylated alanine-rich C-kinase substrate OS=Homo sapiens GN=MARCKS PE=1 SV=4	3	3	120.19	0.162407	0.542217	25.0171	0.277215	Control	577.005	375.082	0.65005	31707	685.549	118.727	12.2465	2.61022	44.6242	2598.27	0	29.8212	63.0733	13.0012	9.42661	424.812	251.974	4.72525	1.97245	15.7651	2444.76	0	18.5706	48.3115	30.1813	7.28236	x
PRDX2_HUMAN	Peroxiredoxin-2 OS=Homo sapiens GN=PRDX2 PE=1 SV=5	5	4	263.57	0.162922	0.542217	5.51633	0.276595	Control	1143.39	378.267	0.330828	22049	2397.89	3327.78	486.82	6.19917	169.997	471.682	14.6627	4.92689	8.86816	510.618	497.296	1485.89	7062.55	187.836	4.68449	60.0577	443.813	7.94568	3.06814	6.79264	1185.36	384.177	x
FIBB_HUMAN	Fibrinogen beta chain OS=Homo sapiens GN=FGB PE=1 SV=2	5	5	226.36	0.165909	0.542217	12.2188	0.27305	Cirrho	443.811	3458.5	7.79274	56577	115.522	237.833	781.401	950.612	103.88	473.618	587.153	18464.1	7460.38	495.834	106.651	71.5852	504.754	301.499	718.343	36.6994	445.635	318.177	11498.2	5714.34	1151.04	82.3912	x
IST1_HUMAN	IST1 homolog OS=Homo sapiens GN=IST1 PE=1 SV=1	16	16	926.87	0.166513	0.542217	1.93201	0.272343	Cirrho	6612.09	9812.31	1.48399	39897	23238.5	1830.54	48.3935	14220.2	153.137	181.842	29170.6	10283	10681	437.465	13301.1	14400.1	3884.96	18.6723	10745.7	54.1012	171.098	15807.5	6403.57	8181.18	1015.54	10275.5	x
CO7_HUMAN	Complement component C7 OS=Homo sapiens GN=C7 PE=1 SV=2	10	10	505.16	0.167158	0.542217	1.44386	0.271591	Cirrho	1223.62	1262.22	1.03154	96650	14.8524	78.0562	3449.94	246.996	3551.9	0	724.669	2491.52	2690.01	205.191	2722.33	9.20354	165.659	1331.14	186.646	1254.84	0	392.696	1551.55	2060.43	476.335	2103.09	x
NQO2_HUMAN	Ribosyldihydronicotinamide dehydrogenase [quinone] OS=Homo sapiens GN=NQO2 PE=1 SV=5	2	2	61.49	0.168205	0.542217	1.92028	0.270377	Cirrho	94.7992	133.742	1.41079	26130	60.8172	237.235	22.248	118.789	0	129.706	141.807	101.213	251.705	246.258	169.223	37.6864	503.483	8.58425	89.7647	0	122.043	76.8451	63.0285	192.795	571.669	130.73	x
1433T_HUMAN	14-3-3 protein theta OS=Homo sapiens GN=YWHAQ PE=1 SV=1	5	2	305.38	0.169277	0.542217	2.85614	0.269146	Control	1919.16	860.097	0.448162	28032	936.125	210.739	5109.76	544.285	2543.41	2170.67	192.256	460.411	1127.25	71.5986	1508.2	580.086	447.251	1971.57	411.297	898.551	2042.42	104.183	286.713	863.43	166.211	1165.13	x
ANXA3_HUMAN	Annexin A3 OS=Homo sapiens GN=ANXA3 PE=1 SV=3	9	9	516.67	0.171437	0.542217	1.25719	0.266693	Cirrho	1208.49	1560.54	1.29132	36524	335.192	807.186	0	1129.81	7.56187	4971.17	2099.19	898.611	1608.63	907.034	2083.02	207.708	1713.09	0	853.753	2.67151	4677.46	1137.54	559.594	1232.14	2105.61	1609.2	x
PEF1_HUMAN	Peflin OS=Homo sapiens GN=PEF1 PE=1 SV=1	2	2	121.59	0.171949	0.542217	1.4149	0.266117	Cirrho	246.86	361.4	1.46399	30646	10.5355	224.644	0	36.2342	0	1209.74	45.9416	51.4532	138.777	1154.75	355.48	6.5285	476.762	0	27.3809	0	1138.27	24.8956	32.0416	106.297	2680.67	274.62	x
LDHA_HUMAN	L-lactate dehydrogenase A chain OS=Homo sapiens GN=LDHA PE=1 SV=2	10	8	498.8	0.172773	0.542217	2.04557	0.265194	Cirrho	1512.65	2076.63	1.37285	36950	276.889	4315.26	1070.28	1616.32	1226.34	570.804	5652.48	2119.52	3899.01	551.235	3248.91	171.579	9158.28	412.961	1221.4	433.251	537.078	3063.07	1319.9	2986.48	1279.65	2509.89	x
ABCB6_HUMAN	ATP-binding cassette sub-family B member 6, mitochondrial OS=Homo sapiens GN=ABCB6 PE=1 SV=1	2	2	137.61	0.17423	0.542217	9.3459	0.263577	Cirrho	5.16405	30.7315	5.95105	94396	0	26.1606	0	0	0	4.82368	0	0	91.7195	82.7417	66.8525	0	55.5208	0	0	0	4.53868	0	0	70.2533	192.079	51.6457	x
LAC2_HUMAN;LAC1_HUMAN	Ig lambda-2 chain C regions OS=Homo sapiens GN=IGLC2 PE=1 SV=1	7	3	632.26	0.174406	0.542217	2.77931	0.263384	Cirrho	36414.8	67597.1	1.85631	11458	6822.67	32628.7	36519.4	62987.6	75424.3	4106.08	13049.2	84181.4	119945	38361.9	250502	4227.78	69248	14090.8	47597.4	26646.4	3863.48	7071.31	52422.5	91872.9	89054.4	193521	x
MGA_HUMAN	Maltase-glucoamylase, intestinal OS=Homo sapiens GN=MGAM PE=1 SV=5	16	16	729.8	0.174448	0.542217	2.06908	0.263337	Cirrho	5382.97	8209.41	1.52507	211031	1773.71	1267.85	3717.42	8274.83	12519.3	4744.72	15388.5	21520.2	3459.32	3607.7	11713.2	1099.11	2690.77	1434.34	6252.99	4422.9	4464.38	8338.98	13401.3	2649.69	8375.02	9048.84	x
KV204_HUMAN	Ig kappa chain V-II region TEW OS=Homo sapiens PE=1 SV=1	3	3	153.45	0.175147	0.542217	1.80904	0.262568	Cirrho	5692.52	6890.81	1.2105	12422	36.6319	619.498	11066.6	12975.7	8991.99	464.64	14334.8	22131.3	7837.83	3393.12	3792.78	22.6996	1314.76	4270	9805.29	3176.75	437.187	7768.01	13781.9	6003.45	7876.89	2930.04	x
PEBP1_HUMAN	Phosphatidylethanolamine-binding protein 1 OS=Homo sapiens GN=PEBP1 PE=1 SV=3	4	4	197.58	0.175501	0.542217	1.78513	0.26218	Control	2830.39	2058.33	0.727224	21158	3335.49	2219.8	2596.67	1087.36	1384.34	6358.65	688.852	1731.79	1064.05	3083.66	1359.33	2066.89	4711.09	1001.91	821.679	489.07	5982.96	373.287	1078.44	815.021	7158.5	1050.12	x
PLMN_HUMAN	Plasminogen OS=Homo sapiens GN=PLG PE=1 SV=2	11	11	425.41	0.175514	0.542217	7.65158	0.262166	Cirrho	989.544	4900.17	4.95195	93247	0	132.16	554.374	2998.85	1319.46	932.419	754.458	6131.5	29547.3	682.548	742.137	0	280.484	213.902	2266.12	466.148	877.328	408.839	3818.28	22632	1584.48	573.325	x
ITM2B_HUMAN	Integral membrane protein 2B OS=Homo sapiens GN=ITM2B PE=1 SV=1	4	4	162.68	0.175938	0.542217	3.99939	0.261704	Cirrho	5740.23	15330.6	2.67073	30832	0	2275.42	1632.53	10460.8	18768.1	1304.5	34057.1	8375.11	57384.1	1492.7	13478	0	4829.13	629.902	7904.86	6630.54	1227.42	18455.5	5215.45	43953.8	3465.18	10412.2	x
PROM2_HUMAN	Prominin-2 OS=Homo sapiens GN=PROM2 PE=1 SV=1	7	7	308.13	0.176506	0.542217	2.63209	0.261085	Control	3006.01	1566.52	0.52113	93079	3809.07	788.307	2371.75	364.122	9545.06	1157.78	0	113	2461.09	2476.23	659.999	2360.35	1673.02	915.124	275.154	3372.14	1089.37	0	70.3685	1885.09	5748.38	509.87	x
FAS_HUMAN	Fatty acid synthase OS=Homo sapiens GN=FASN PE=1 SV=3	8	8	311.62	0.176812	0.542217	5.76007	0.260754	Control	725.167	520.69	0.718027	275877	411.98	135.607	47.0087	101.932	268.543	3385.93	31.552	71.3591	364.703	22.5121	139.351	255.29	287.8	18.138	77.0262	94.8726	3185.88	17.098	44.4376	279.347	52.2601	107.653	x
EVPL_HUMAN	Envoplakin OS=Homo sapiens GN=EVPL PE=1 SV=3	2	2	170.85	0.179946	0.542217	2.48001	0.257394	Cirrho	46.6924	76.7892	1.64458	232774	0	10.4404	153.521	16.2021	99.9906	0	21.619	406.555	14.5566	54.815	81.4427	0	22.1577	59.2352	12.2434	35.3253	0	11.7153	253.175	11.1497	127.249	62.9171	x
SPB3_HUMAN	Serpin B3 OS=Homo sapiens GN=SERPINB3 PE=1 SV=2	15	9	1060.79	0.181386	0.542217	2.05522	0.255875	Control	12330.2	5135.37	0.416488	44594	7771.22	39102.3	5506.32	10067.9	7797.01	3736.36	6227.08	16255.6	4107.62	1504.83	1902.06	4815.57	82986.8	2124.58	7607.95	2754.58	3515.6	3374.44	10122.9	3146.26	3493.36	1469.4	x
RAB5C_HUMAN	Ras-related protein Rab-5C OS=Homo sapiens GN=RAB5C PE=1 SV=2	6	6	301.37	0.182565	0.542217	1.48527	0.254643	Cirrho	1199.14	1278.3	1.06601	23696	9.96623	168.875	2650.5	780.094	3503.28	82.1578	2993.65	1353.94	2971.24	510.183	1076.27	6.17574	358.405	1022.68	589.489	1237.66	77.3036	1622.25	843.142	2275.85	1184.35	831.453	x
EF2_HUMAN	Elongation factor 2 OS=Homo sapiens GN=EEF2 PE=1 SV=4	5	5	242.07	0.182847	0.542217	2.09393	0.254351	Control	2195.21	1051.93	0.479191	96246	1989.38	600.097	6088.08	1174.91	2011.3	1307.5	1232.31	2011.79	673.888	588.907	734.944	1232.75	1273.59	2349.05	887.837	710.565	1230.25	667.787	1252.81	516.17	1367.1	567.768	x
ALS_HUMAN	Insulin-like growth factor-binding protein complex acid labile subunit OS=Homo sapiens GN=IGFALS PE=1 SV=1	5	5	191.43	0.183013	0.542217	1.34849	0.254178	Cirrho	419.499	364.049	0.867819	66735	0	2103.63	170.585	12.8183	225.376	4.58483	515.141	154.652	1899.28	91.8411	167.543	0	4464.54	65.8191	9.68631	79.6223	4.31394	279.154	96.3069	1454.77	213.202	129.432	x
CD177_HUMAN	CD177 antigen OS=Homo sapiens GN=CD177 PE=1 SV=2	2	2	97.81	0.184856	0.542217	3.68967	0.252279	Cirrho	140.839	347.193	2.46517	47929	45.3895	84.5655	136.417	180.079	380.971	17.6145	56.1078	60.5723	535.254	754.098	1192.22	28.1264	179.474	52.6357	136.079	134.592	16.5738	30.4047	37.7203	409.982	1750.58	921.029	x
UPK1A_HUMAN	Uroplakin-1a OS=Homo sapiens GN=UPK1A PE=2 SV=1	5	5	223.49	0.185442	0.542217	2.77746	0.251679	Control	9021	4424.23	0.490437	29429	11869.1	855.601	19608.6	2183.65	11318.6	8290.44	7630.25	2417.16	4628.24	701.265	862.743	7354.87	1815.84	7565.88	1650.1	3998.72	7800.61	4134.81	1505.24	3545.04	1627.94	666.497	x
DCXR_HUMAN	L-xylulose reductase OS=Homo sapiens GN=DCXR PE=1 SV=2	4	4	213.12	0.186295	0.542217	1.70799	0.250812	Cirrho	1281.52	1498.67	1.16944	26182	823.788	937.491	1861.54	3064.34	694.379	307.603	2665.76	1850.43	2789.3	585.648	3053	510.474	1989.64	718.263	2315.61	245.315	289.429	1444.57	1152.32	2136.49	1359.54	2358.54	x
CD2AP_HUMAN	CD2-associated protein OS=Homo sapiens GN=CD2AP PE=1 SV=1	4	4	198.01	0.186574	0.542217	4.58954	0.250529	Cirrho	665.137	2038.95	3.06545	71635	143.97	56.3524	1121.19	1097.82	884.309	687.175	7172.44	4287.98	3261.67	197.431	343.839	89.2135	119.597	432.605	829.586	312.415	646.574	3886.73	2670.26	2498.31	458.321	265.626	x
NECT4_HUMAN	Nectin-4 OS=Homo sapiens GN=NECTIN4 PE=1 SV=1	2	2	84.83	0.187972	0.542217	1.09048	0.249121	Cirrho	329.697	230.708	0.699756	55933	15.711	12.5052	0	1889.14	32.2405	28.5901	547.861	951.456	76.0688	14.7814	207.468	9.73561	26.5398	0	1427.55	11.3901	26.9009	296.884	592.502	58.2655	34.3139	160.276	x
IBP3_HUMAN	Insulin-like growth factor-binding protein 3 OS=Homo sapiens GN=IGFBP3 PE=1 SV=2	2	2	84.34	0.188073	0.542217	5.45559	0.24902	Cirrho	271.792	958.128	3.52523	32680	54.3769	829.216	172.7	316.636	42.857	214.963	113.928	2346.08	525.651	4330.14	98.12	33.6956	1759.85	66.6353	239.27	15.1408	202.262	61.7376	1460.98	402.627	10052.1	75.8009	x
CLC14_HUMAN	C-type lectin domain family 14 member A OS=Homo sapiens GN=CLEC14A PE=1 SV=1	2	2	86.49	0.1885	0.542217	1.88617	0.248593	Cirrho	598.531	717.371	1.19855	52857	46.01	224.635	638.059	2602.28	16.462	63.7436	1599.35	1640.58	1660.39	55.6583	688.689	28.5109	476.743	246.191	1966.45	5.81581	59.9774	866.682	1021.64	1271.79	129.207	532.034	x
K1C9_HUMAN	Keratin, type I cytoskeletal 9 OS=Homo sapiens GN=KRT9 PE=1 SV=3	12	12	570.27	0.188942	0.542217	2.6069	0.248152	Cirrho	3393.63	6755.56	1.99066	62255	14464	309.053	177.414	3071.12	2305.15	35.0718	4029.39	4599.11	17539.6	252.392	17813.7	8962.84	655.903	68.4543	2320.73	814.379	32.9997	2183.52	2864.02	13434.6	585.91	13761.7	x
SPB4_HUMAN	Serpin B4 OS=Homo sapiens GN=SERPINB4 PE=1 SV=2	12	6	684.07	0.189292	0.542217	1.72406	0.247804	Control	1303.51	665.157	0.51028	44997	1141.06	3065.5	876.415	1195.38	1051.25	491.466	279.279	441.88	1133.72	870.79	1054.68	707.078	6505.92	338.159	903.308	371.393	462.429	151.34	275.173	868.385	2021.47	814.775	x
TRFL_HUMAN	Lactotransferrin OS=Homo sapiens GN=LTF PE=1 SV=6	33	32	1933.71	0.189604	0.542217	2.66599	0.247494	Cirrho	11253.2	23943.4	2.12769	80014	10461	1779.78	4942.24	4380.93	13920.4	32035.1	19904.3	67386.4	19825.3	2669.54	40219.4	6482.33	3777.24	1906.93	3310.51	4917.9	30142.3	10786.1	41963.7	15185.3	6197.14	31070.8	x
ENPP2_HUMAN	Ectonucleotide pyrophosphatase/phosphodiesterase family member 2 OS=Homo sapiens GN=ENPP2 PE=1 SV=3	4	4	193.25	0.189721	0.542217	59.2836	0.247378	Control	304.52	3.89267	0.0127829	100811	0	1510.84	23.7398	277.097	15.4492	0	0	15.8363	9.84708	0	0	0	3206.45	9.15985	209.392	5.458	0	0	9.86176	7.54245	0	0	x
CNTN1_HUMAN	Contactin-1 OS=Homo sapiens GN=CNTN1 PE=1 SV=1	3	2	122.23	0.192505	0.545836	2.34199	0.244645	Control	870.988	236.174	0.271156	114104	0	6.2729	0	5187.89	0	31.7668	754.929	324.631	754.063	3.14684	22.7312	0	13.313	0	3920.3	0	29.8899	409.094	202.158	577.58	7.30515	17.5606	x
ANXA2_HUMAN	Annexin A2 OS=Homo sapiens GN=ANXA2 PE=1 SV=2	17	17	902.26	0.192991	0.545836	1.49975	0.244174	Cirrho	2912.37	3154.94	1.08329	38808	111.729	3838.73	104.262	6929.08	4723.71	1766.7	8076.45	4476.56	3478.05	3244.96	2563.11	69.2349	8146.95	40.229	5236.06	1668.83	1662.32	4376.61	2787.7	2664.04	7532.93	1980.09	x
H2A1B_HUMAN;H2A1A_HUMAN	Histone H2A type 1-B/E OS=Homo sapiens GN=HIST1H2AB PE=1 SV=2	2	2	103.29	0.193752	0.546098	2.84336	0.243438	Cirrho	785.643	1482.56	1.88706	14127	800.063	3131.92	410.387	163.849	0	207.643	207.332	1954.4	1190.83	905.121	6911.64	495.773	6646.87	158.345	123.815	0	195.374	112.353	1217.07	912.127	2101.17	5339.46	x
G6PI_HUMAN	Glucose-6-phosphate isomerase OS=Homo sapiens GN=GPI PE=1 SV=4	3	3	91.6	0.196886	0.547383	16.0783	0.240447	Control	453.937	89.5095	0.197185	63335	3.2806	1027.03	84.4216	2.87806	1596.66	9.35197	0.315397	4.05434	0	107.695	29.0997	2.03288	2179.66	32.5736	2.17485	564.079	8.79942	0.170913	2.52477	0	250.007	22.4804	x
GGT1_HUMAN	Gamma-glutamyltranspeptidase 1 OS=Homo sapiens GN=GGT1 PE=1 SV=2	12	11	801.7	0.198339	0.549552	1.53649	0.239082	Cirrho	6807.18	8981.36	1.31939	61714	11534.7	8770.45	1134.98	4480.72	2779.23	12143	15745.8	14060.1	8482.6	9109.08	4898.11	7147.69	18613.5	437.926	3385.92	981.864	11425.5	8532.63	8755.71	6497.31	21146	3783.95	x
S22AB_HUMAN	Solute carrier family 22 member 11 OS=Homo sapiens GN=SLC22A11 PE=1 SV=1	2	2	59.55	0.204414	0.564471	1.52983	0.233509	Cirrho	149.842	229.825	1.53378	60674	2.82446	136.026	22.8873	0	5.21458	732.103	13.3694	77.6459	129.436	832.273	93.4399	1.75022	288.687	8.83091	0	1.84224	688.847	7.24486	48.3526	99.1427	1932.06	72.1853	x
HPT_HUMAN	Haptoglobin OS=Homo sapiens GN=HP PE=1 SV=1	2	2	66.01	0.207691	0.566053	7.60411	0.230592	Cirrho	191.633	917.178	4.78612	45861	0	503.512	0	550.836	65.2939	30.1536	42.8095	1288.06	23.3789	92.2785	5839.46	0	1068.61	0	416.247	23.0674	28.372	23.1983	802.114	17.9073	214.218	4511.17	x
ANXA4_HUMAN	Annexin A4 OS=Homo sapiens GN=ANXA4 PE=1 SV=4	17	16	1294.75	0.208613	0.566053	1.78252	0.229783	Cirrho	2802.13	3697.85	1.31965	36088	1626.04	816.195	5842.04	2095.31	4173.02	2260.19	5510.32	8468.37	4747.83	1146.08	5101.64	1007.6	1732.21	2254.11	1583.35	1474.27	2126.65	2986.03	5273.53	3636.64	2660.54	3941.18	x
NHRF3_HUMAN	Na(+)/H(+) exchange regulatory cofactor NHE-RF3 OS=Homo sapiens GN=PDZK1 PE=1 SV=2	25	25	1281.95	0.209844	0.566053	1.99915	0.228709	Cirrho	2240.5	3744.8	1.67141	57379	4701.52	575.938	552.729	2452.3	350.599	4809.91	2409.33	2358.29	2017.81	13623.8	1986.21	2913.38	1222.31	213.267	1853.11	123.862	4525.73	1305.61	1468.58	1545.56	31626.6	1534.41	x
RALB_HUMAN	Ras-related protein Ral-B OS=Homo sapiens GN=RALB PE=1 SV=1	3	2	176.58	0.210378	0.566053	3.86256	0.228245	Cirrho	76.5024	215.282	2.81405	23508	147.876	43.8552	48.3232	0	89.9863	128.974	170.525	809.432	26.2832	406.673	64.5654	91.6337	93.0741	18.6452	0	31.791	121.354	92.4069	504.06	20.1318	944.06	49.8788	x
NEUS_HUMAN	Neuroserpin OS=Homo sapiens GN=SERPINI1 PE=1 SV=1	2	2	101.82	0.210862	0.566053	6.915	0.227827	Control	455.103	53.9584	0.118563	46397	12.1437	1925.55	62.9857	628.899	0	101.043	0	8.04186	0	308.596	12.432	7.52503	4086.6	24.3027	475.237	0	95.0727	0	5.00793	0	716.382	9.6041	x
FBLN4_HUMAN	EGF-containing fibulin-like extracellular matrix protein 2 OS=Homo sapiens GN=EFEMP2 PE=1 SV=3	3	3	176.42	0.211321	0.566053	1.95042	0.227431	Cirrho	2496.02	3144.92	1.25997	51767	713.332	738.799	7338.32	5247.92	861.878	75.88	4812.34	9179.03	7986.59	736.008	1627.45	442.028	1567.96	2831.44	3965.67	304.49	71.3967	2607.8	5716.08	6117.39	1708.59	1257.26	x
S10A6_HUMAN	Protein S100-A6 OS=Homo sapiens GN=S100A6 PE=1 SV=1	3	3	122.38	0.215364	0.567103	2.09012	0.223994	Control	5215.82	3097.2	0.593808	10230	14672.8	2726.44	6249.38	1638.25	4160.85	1847.17	171.106	2411.14	1657.71	3019.73	5217.61	9092.27	5786.33	2411.28	1237.97	1469.97	1738.03	92.7217	1501.5	1269.74	7010.09	4030.77	x
WASF2_HUMAN	Wiskott-Aldrich syndrome protein family member 2 OS=Homo sapiens GN=WASF2 PE=1 SV=3	2	2	97.77	0.215491	0.567103	1.88453	0.223888	Cirrho	35.4082	44.5105	1.25707	54478	0	83.0547	54.8021	50.7379	0	23.8543	95.5211	32.4451	155.356	15.9013	34.416	0	176.267	21.145	38.3408	0	22.4449	51.7626	20.2046	118.996	36.9137	26.5875	x
UROK_HUMAN	Urokinase-type plasminogen activator OS=Homo sapiens GN=PLAU PE=1 SV=2	10	9	723.75	0.215774	0.567103	1.82661	0.22365	Cirrho	2803.47	3470.15	1.2378	49901	42.0336	9578.29	3806.13	944.626	296.358	2153.37	5814.63	6624.47	10346.4	764.56	2054.21	26.0468	20328	1468.57	713.82	104.699	2026.14	3150.93	4125.27	7924.91	1774.87	1586.94	x
FBLN1_HUMAN	Fibulin-1 OS=Homo sapiens GN=FBLN1 PE=1 SV=4	10	10	547.29	0.218784	0.572534	2.88452	0.221152	Cirrho	2221.47	4160.63	1.87292	81268	24.2193	261.927	559.074	10139.1	1659.68	684.851	1967.6	8399.22	17929.6	147.988	3594.93	15.0079	555.888	215.715	7661.72	586.344	644.388	1066.24	5230.47	13733.3	343.543	2777.2	x
F16P1_HUMAN	Fructose-1,6-bisphosphatase 1 OS=Homo sapiens GN=FBP1 PE=1 SV=5	10	9	613.46	0.219241	0.572534	4.79867	0.220777	Control	3331.39	592.048	0.177718	37218	574.017	15101.8	897.824	2054.08	630.949	729.727	969.728	386.052	342.45	1011.86	761.079	355.699	32050.5	346.42	1552.19	222.906	686.612	525.493	240.407	262.302	2348.95	587.958	x
ITB1_HUMAN	Integrin beta-1 OS=Homo sapiens GN=ITGB1 PE=1 SV=2	2	2	84.9	0.22188	0.577579	3.75122	0.218631	Cirrho	195.044	469.668	2.40801	91664	68.7211	24.8382	981.414	0	56.4469	38.8459	2411.66	19.821	994.028	48.1357	184.623	42.5842	52.7142	378.672	0	19.942	36.5507	1306.87	12.3432	761.384	111.743	142.627	x
CO4B_HUMAN;PIBF1_HUMAN	Complement C4-B OS=Homo sapiens GN=C4B PE=1 SV=2	25	22	1295.36	0.222643	0.577726	2.25358	0.218016	Control	3619.22	1904.07	0.5261	194170	5408.33	632.945	3816.56	2316.72	8722.87	817.921	4286.4	1137.82	1412.18	89.8608	1103.69	3351.37	1343.3	1472.59	1750.66	3081.67	769.595	2322.79	708.556	1081.67	208.605	852.639	x
CRCT1_HUMAN	Cysteine-rich C-terminal protein 1 OS=Homo sapiens GN=CRCT1 PE=1 SV=1	2	2	61.07	0.226133	0.584925	15.3965	0.215242	Cirrho	102.408	1014.31	9.90462	10698	63.8564	8.03157	0	1.05367	541.504	0	0	6823.03	79.6838	17.4269	963.446	39.5697	17.0454	0	0.796218	191.306	0	0	4248.92	61.0344	40.4554	744.293	x
SCRN2_HUMAN	Secernin-2 OS=Homo sapiens GN=SCRN2 PE=1 SV=3	2	2	78.62	0.23107	0.593935	2.60641	0.211415	Cirrho	115.67	192.262	1.66217	47023	0	0	132.702	519.087	15.398	26.8302	1054.54	289.448	47.4684	110.56	5.39993	0	0	51.2024	392.255	5.4399	25.245	571.451	180.249	36.3588	256.657	4.17162	x
STK24_HUMAN	Serine/threonine-protein kinase 24 OS=Homo sapiens GN=STK24 PE=1 SV=1	2	2	130.65	0.233339	0.597889	1.04509	0.209692	Control	418.441	319.59	0.763765	49562	38.9596	14.6173	1650.77	6.46852	377.664	422.165	636.975	527.984	414.946	241.165	180.865	24.142	31.0224	636.94	4.88803	133.424	397.222	345.175	328.793	317.831	559.847	139.724	x
MVP_HUMAN	Major vault protein OS=Homo sapiens GN=MVP PE=1 SV=4	6	6	267.16	0.235504	0.601549	1.86079	0.20807	Cirrho	162.053	243.538	1.50283	99551	230.578	142.688	51.2108	231.465	0	316.378	216.085	156.925	162.168	509.368	463.191	142.882	302.827	19.7594	174.91	0	297.685	117.096	97.7225	124.214	1182.46	357.83	x
APOA2_HUMAN	Apolipoprotein A-II OS=Homo sapiens GN=APOA2 PE=1 SV=1	2	2	98.24	0.237316	0.60429	597.107	0.206728	Control	2101.28	8.24533	0.00392396	11282	15.6593	12525.1	0	25.7705	0	41.0914	0	3.25783	4.48314	9.85451	0	9.70355	26582.1	0	19.4738	0	38.6636	0	2.02876	3.4339	22.8765	0	x
CHM1A_HUMAN	Charged multivesicular body protein 1a OS=Homo sapiens GN=CHMP1A PE=1 SV=1	6	4	264.95	0.23978	0.606784	2.17275	0.204924	Cirrho	406.994	678.619	1.66739	21746	1287.45	320.531	7.40311	603.731	0	222.845	115.597	2014.54	1759.17	204.506	327.663	797.793	680.264	2.85645	456.218	0	209.678	62.6417	1254.52	1347.45	474.745	253.13	x
DPYS_HUMAN	Dihydropyrimidinase OS=Homo sapiens GN=DPYS PE=1 SV=1	3	2	222.51	0.241541	0.609086	4.73156	0.203651	Cirrho	221.979	656.441	2.95723	57107	0	915.203	0	416.669	0	0	2745.58	440.664	2059.87	5.41501	0	0	1942.34	0	314.862	0	0	1487.82	274.416	1577.77	12.5705	0	x
HBA_HUMAN	Hemoglobin subunit alpha OS=Homo sapiens GN=HBA1 PE=1 SV=2	5	5	289.87	0.24218	0.609086	2.23864	0.203192	Control	2582.47	1175.09	0.455024	15305	451.546	7962.27	1074.78	1870.06	916.995	3219.19	788.614	630.379	959.16	3227.48	162.321	279.808	16898.3	414.699	1413.14	323.962	3028.98	427.348	392.558	734.676	7492.35	125.398	x
SLPI_HUMAN	Antileukoproteinase OS=Homo sapiens GN=SLPI PE=1 SV=2	3	3	131.31	0.244826	0.611449	1.48223	0.201309	Cirrho	3183.93	3085.32	0.969029	15228	131.284	922.939	4465.44	12505.5	17.2185	1061.21	2312.04	12714.1	5158.75	593.999	2817.75	81.3527	1958.76	1722.96	9449.96	6.08306	998.513	1252.89	7917.48	3951.39	1378.92	2176.8	x
ARPC4_HUMAN	Actin-related protein 2/3 complex subunit 4 OS=Homo sapiens GN=ARPC4 PE=1 SV=3	4	4	164.68	0.24533	0.611449	1.9737	0.200954	Cirrho	16.1594	21.0508	1.3027	19768	0	84.6871	0	2.77039	0	9.49868	5.55913	47.3016	25.7752	80.8328	0	0	179.732	0	2.09348	0	8.93746	3.01248	29.4562	19.7427	187.647	0	x
PTPRJ_HUMAN	Receptor-type tyrosine-protein phosphatase eta OS=Homo sapiens GN=PTPRJ PE=1 SV=3	9	7	408.66	0.246388	0.611449	3.29057	0.200211	Cirrho	1437.59	3206.27	2.2303	147048	277.491	333.159	2438.89	1011.66	4201.62	362.735	2462.96	2562.49	2363.12	238.161	16025.8	171.952	707.065	941.031	764.478	1484.38	341.303	1334.67	1595.74	1810.05	552.874	12380.4	x
CLIC1_HUMAN	Chloride intracellular channel protein 1 OS=Homo sapiens GN=CLIC1 PE=1 SV=4	7	6	364.14	0.248807	0.611449	1.44504	0.19853	Cirrho	1122.87	1615.79	1.43898	27248	61.5339	283.618	0	1240.63	122.258	5029.17	3986.77	683.777	2764.02	524.648	153.726	38.1305	601.924	0	937.502	43.1921	4732.03	2160.42	425.81	2117.13	1217.93	118.759	x
FBN1_HUMAN	Fibrillin-1 OS=Homo sapiens GN=FBN1 PE=1 SV=3	3	3	159.53	0.251439	0.611449	3.47469	0.196725	Cirrho	193.573	479.159	2.47534	332664	0	111.748	85.4485	23.41	706.246	234.586	224.08	29.8892	1546.36	87.7151	1474.99	0	237.163	32.9698	17.6901	249.507	220.726	121.428	18.6129	1184.45	203.624	1139.48	x
HS90A_HUMAN;TRAP1_HUMAN	Heat shock protein HSP 90-alpha OS=Homo sapiens GN=HSP90AA1 PE=1 SV=5	6	3	356.92	0.253339	0.611449	2.45802	0.195438	Control	1090.3	590.813	0.54188	85006	1489.81	955.174	2021.7	335.841	86.8639	1652.42	11.9105	870.994	572.25	381.731	380.957	923.185	2027.17	780.061	253.783	30.6879	1554.79	6.45426	542.396	438.319	886.159	294.302	x
CHMP5_HUMAN	Charged multivesicular body protein 5 OS=Homo sapiens GN=CHMP5 PE=1 SV=1	13	13	1505.77	0.253818	0.611449	2.9272	0.195116	Cirrho	74814.6	150792	2.01554	24612	39020.2	8036.38	127304	88444.9	149611	36471.5	409633	206044	239839	9401.57	230069	24179.5	17055.6	49119.3	66834.7	52855.6	34316.6	221979	128310	183707	21825	177735	x
GRHPR_HUMAN	Glyoxylate reductase/hydroxypyruvate reductase OS=Homo sapiens GN=GRHPR PE=1 SV=1	3	3	123.86	0.254444	0.611449	5.06918	0.194696	Control	256.28	92.6462	0.361504	36045	377.121	774.353	0	69.967	72.9321	243.307	13.0069	4.9886	43.3017	191.485	0	233.69	1643.41	0	52.8715	25.7659	228.931	7.04843	3.10656	33.1673	444.519	0	x
PPIA_HUMAN	Peptidyl-prolyl cis-trans isomerase A OS=Homo sapiens GN=PPIA PE=1 SV=2	8	8	425.75	0.255893	0.611449	1.52045	0.193729	Cirrho	10644.7	12753.5	1.19811	18229	8113.52	4655.68	23361.7	2333.76	13317.9	12085.8	24701.6	24238.9	15031.6	5872.01	11079.9	5027.68	9880.76	9013.96	1763.54	4705.02	11371.7	13385.7	15094.3	11513.6	13631.4	8559.55	x
KPYM_HUMAN	Pyruvate kinase PKM OS=Homo sapiens GN=PKM PE=1 SV=4	20	20	1198.7	0.256994	0.611449	2.64231	0.193	Cirrho	8323.93	15829.2	1.90165	58470	991.763	3818.23	8709.85	15814.4	5691.81	14917.5	27223.2	51273.7	16075.6	1669.46	13730.3	614.563	8103.44	3360.64	11950.4	2010.84	14036.1	14752.2	31929.8	12313.2	3875.54	10607.1	x
CATD_HUMAN	Cathepsin D OS=Homo sapiens GN=CTSD PE=1 SV=1	12	12	879.96	0.257571	0.611449	1.68994	0.19262	Cirrho	4775.81	5444.76	1.14007	45037	751.967	4909.18	5748.29	10279.4	6494.48	471.494	12409.9	13731.3	5134.56	1928.74	7149.58	465.969	10418.8	2217.94	7767.8	2294.41	443.637	6724.88	8550.93	3932.86	4477.42	5523.28	x
BI2L1_HUMAN	Brain-specific angiogenesis inhibitor 1-associated protein 2-like protein 1 OS=Homo sapiens GN=BAIAP2L1 PE=1 SV=2	3	3	244.62	0.259639	0.611449	1.18674	0.191266	Cirrho	1080.65	897.141	0.830184	57189	853.093	50.6126	4723.82	213.906	626.776	15.7121	609.834	1106.26	2858.72	218.144	1619.32	528.634	107.415	1822.66	161.641	221.431	14.7838	330.467	688.904	2189.66	506.406	1250.98	x
PGS1_HUMAN	Biglycan OS=Homo sapiens GN=BGN PE=1 SV=2	2	2	103.02	0.25998	0.611449	5.45585	0.191044	Control	863.888	230.174	0.26644	42027	138.903	1135.32	180.927	2700.7	5.37992	1022.1	1.59063	52.6427	148.443	510.329	78.7019	86.0735	2409.5	69.8095	2040.82	1.90065	961.711	0.861958	32.7823	113.701	1184.69	60.7997	x
CHM4B_HUMAN	Charged multivesicular body protein 4b OS=Homo sapiens GN=CHMP4B PE=1 SV=1	6	6	393.29	0.260614	0.611449	1.34016	0.190633	Cirrho	4761.26	4789.9	1.00602	24935	5239.53	1514.62	14784.1	3066.02	954.473	3008.78	11281.2	8336.63	3727.99	3131.56	5426.86	3246.77	3214.49	5704.36	2316.88	337.203	2831.01	6113.24	5191.49	2855.49	7269.69	4192.42	x
PLEC_HUMAN	Plectin OS=Homo sapiens GN=PLEC PE=1 SV=3	3	2	97.8	0.263417	0.611449	7.84998	0.188831	Cirrho	47.5439	245.427	5.16213	533462	32.631	67.9526	0	102.73	0	81.9498	103.594	1682.48	15.1924	53.7323	11.0953	20.2204	144.216	0	77.6291	0	77.1079	56.1374	1047.73	11.6367	124.736	8.57146	x
KINH_HUMAN	Kinesin-1 heavy chain OS=Homo sapiens GN=KIF5B PE=1 SV=1	4	4	210.91	0.269821	0.611449	8.15242	0.184814	Control	2433.53	241.568	0.0992666	110358	160.201	158.888	12333.3	1531.57	88.1801	329.044	21.0048	243.964	606.493	29.2826	591.777	99.2713	337.209	4758.73	1157.35	31.1529	309.603	11.3824	151.924	464.548	67.9774	457.166	x
S36A2_HUMAN	Proton-coupled amino acid transporter 2 OS=Homo sapiens GN=SLC36A2 PE=1 SV=1	7	7	388.93	0.270755	0.611449	2.50221	0.184239	Cirrho	3388.9	6404.18	1.88975	53809	6038.54	894.748	2090.72	3288.59	4175.96	3844.83	17106.4	10739.9	8024.11	721.359	5806.77	3741.89	1898.93	806.689	2485.07	1475.31	3617.67	9269.94	6688.09	6146.13	1674.58	4485.91	x
ALDOA_HUMAN	Fructose-bisphosphate aldolase A OS=Homo sapiens GN=ALDOA PE=1 SV=2	9	8	364.95	0.271256	0.611449	3.76052	0.183932	Control	2409.93	1280.93	0.531521	39851	7902.52	2783.34	734.254	705.595	84.6103	2249.24	55.5433	980.448	373.63	1366.08	428.543	4896.94	5907.09	283.307	533.193	29.8917	2116.35	30.0988	610.557	286.185	3171.26	331.063	x
TTYH3_HUMAN	Protein tweety homolog 3 OS=Homo sapiens GN=TTYH3 PE=1 SV=3	4	4	296.29	0.271429	0.611449	8.41942	0.183826	Cirrho	92.0805	500.971	5.44057	58477	0	33.6935	282.715	6.29634	144.239	85.5391	3.68527	769.632	1263.61	18.5101	1820.89	0	71.5078	109.084	4.75792	50.9577	80.4851	1.99704	479.275	967.869	42.9698	1406.7	x
TRI47_HUMAN	Tripartite motif-containing protein 47 OS=Homo sapiens GN=TRIM47 PE=1 SV=2	2	2	89.55	0.273602	0.611449	1.03358	0.182505	Cirrho	1164.23	1253.15	1.07638	70970	3877.32	209.046	66.4947	102.683	1638.12	1091.73	2120.77	1157.51	1135.06	766.176	837.101	2402.65	443.66	25.6566	77.5941	578.725	1027.22	1149.24	720.82	869.411	1778.62	646.688	x
PNPH_HUMAN	Purine nucleoside phosphorylase OS=Homo sapiens GN=PNP PE=1 SV=2	6	6	360.93	0.276261	0.611449	1.54099	0.180908	Control	1343.24	702.764	0.523187	32325	997.565	3214.62	969.489	1849.74	547.396	480.604	2478.15	196.583	533.93	735.598	414.1	618.158	6822.4	374.071	1397.78	193.388	452.208	1342.9	122.419	408.968	1707.64	319.905	x
GGT6_HUMAN	Gamma-glutamyltransferase 6 OS=Homo sapiens GN=GGT6 PE=2 SV=2	3	3	267.67	0.276619	0.611449	1.1644	0.180694	Control	2995.39	1627.96	0.543489	51048	0	7163.81	0	10584.7	83.8539	139.958	1351.79	8355.59	2577.06	42.509	535.417	0	15203.8	0	7998.49	29.6245	131.689	732.533	5203.3	1973.92	98.6815	413.627	x
TRHDE_HUMAN	Thyrotropin-releasing hormone-degrading ectoenzyme OS=Homo sapiens GN=TRHDE PE=2 SV=1	7	7	323.29	0.276843	0.611449	2.97964	0.180561	Control	334.278	72.7442	0.217616	117439	0	1964.33	0	18.9962	0	22.3372	48.1801	1.44813	83.9333	190.845	236.53	0	4168.91	0	14.3547	0	21.0175	26.1087	0.901799	64.2894	443.033	182.727	x
DPP2_HUMAN	Dipeptidyl peptidase 2 OS=Homo sapiens GN=DPP7 PE=1 SV=3	6	6	225.9	0.276884	0.611449	1.58084	0.180537	Cirrho	1137.67	1365.64	1.20038	54763	5.71766	755.471	1990.77	1921.56	163.559	1988.94	3756.29	2564.07	861.677	958.401	851.913	3.54305	1603.34	768.125	1452.05	57.7831	1871.43	2035.52	1596.73	660.009	2224.86	658.13	x
S13A2_HUMAN	Solute carrier family 13 member 2 OS=Homo sapiens GN=SLC13A2 PE=2 SV=1	6	6	250.35	0.27789	0.611449	1.33005	0.17994	Cirrho	394.214	485.8	1.23233	64995	1268.8	14.9184	11.8946	317.767	389.566	362.339	1143.02	633.139	273.067	396.771	175.613	786.232	31.6614	4.58945	240.125	137.628	340.931	619.4	394.276	209.158	921.075	135.667	x
DHSO_HUMAN	Sorbitol dehydrogenase OS=Homo sapiens GN=SORD PE=1 SV=4	5	5	241.55	0.279003	0.611449	4.1877	0.179283	Control	1649.02	1374.5	0.833525	38927	10.4389	106.709	0	189.279	0.986701	9586.73	160.734	462.899	64.9425	1155.29	125.019	6.46866	226.47	0	143.031	0.348588	9020.31	87.1012	288.262	49.7432	2681.93	96.5814	x
ACTN4_HUMAN	Alpha-actinin-4 OS=Homo sapiens GN=ACTN4 PE=1 SV=2	12	12	550.92	0.279528	0.611449	1.39824	0.178975	Cirrho	1143.05	1285.47	1.12459	105245	3139.96	691.438	34.8738	2425.23	317.57	249.254	2658.4	2790.52	1387.85	439.767	714.753	1945.73	1467.44	13.4558	1832.66	112.193	234.527	1440.58	1737.75	1063.03	1020.89	552.17	x
KV302_HUMAN	Ig kappa chain V-III region SIE OS=Homo sapiens PE=1 SV=1	4	3	339.79	0.280663	0.611449	1.45339	0.178311	Cirrho	8523.55	8610.07	1.01015	11882	2551.98	4914.77	30907.5	7071.58	0	5695.43	17858.2	20092.7	7392.17	6753.56	9843.65	1581.38	10430.6	11925.5	5343.74	0	5358.92	9677.32	12512.4	5662.09	15677.9	7604.54	x
PAG15_HUMAN	Group XV phospholipase A2 OS=Homo sapiens GN=PLA2G15 PE=1 SV=2	2	2	60.32	0.281813	0.611449	32.0789	0.177642	Control	194.65	33.495	0.172078	46913	1.40239	499.221	0	0	665.554	1.72201	0	0	0	30.3392	0	0.869016	1059.5	0	0	235.131	1.62027	0	0	0	70.4302	0	x
AK1A1_HUMAN	Alcohol dehydrogenase [NADP(+)] OS=Homo sapiens GN=AKR1A1 PE=1 SV=3	8	8	389.21	0.283464	0.611449	1.05274	0.176689	Control	2900.93	2082.71	0.717946	36892	1042.49	12716.2	19.2397	1052.89	314.629	2260.11	5675.78	3131.41	1906.9	1383.05	1680.8	645.994	26987.6	7.42351	795.633	111.154	2126.58	3075.69	1950.03	1460.61	3210.65	1298.47	x
CD14_HUMAN	Monocyte differentiation antigen CD14 OS=Homo sapiens GN=CD14 PE=1 SV=2	4	4	356.16	0.287822	0.611449	1.12955	0.174211	Control	3777.8	2247.21	0.594846	40678	0	1681.49	60.619	18558.5	1652.95	713.244	3871.93	8325.22	1289.72	475.559	2760.18	0	3568.62	23.3895	14024	583.965	671.103	2098.19	5184.38	987.869	1103.97	2132.32	x
6PGL_HUMAN	6-phosphogluconolactonase OS=Homo sapiens GN=PGLS PE=1 SV=2	7	7	346.91	0.28834	0.611449	1.96847	0.17392	Cirrho	3428.77	4782.53	1.39482	27815	1866.57	4631.19	2348.82	7127.47	1651.34	2947.24	5791.66	8704.97	3280.62	1275.85	14694	1156.65	9828.79	906.279	5385.97	583.395	2773.1	3138.49	5420.87	2512.81	2961.79	11351.6	x
GALNS_HUMAN	N-acetylgalactosamine-6-sulfatase OS=Homo sapiens GN=GALNS PE=1 SV=1	3	3	90.95	0.29057	0.611449	3.16344	0.172676	Control	214.538	44.2913	0.20645	58445	12.8717	1181.97	0	81.7632	4.63786	5.97922	97.1266	98.0852	48.3285	38.8883	56.6613	7.97618	2508.51	0	61.7855	1.63849	5.62594	52.6327	61.0808	37.0176	90.2762	43.7727	x
SIAS_HUMAN	Sialic acid synthase OS=Homo sapiens GN=NANS PE=1 SV=2	2	2	81.6	0.290701	0.611449	1.75102	0.172604	Control	148.903	149.403	1.00336	40738	0.739634	20.5095	42.0595	0	19.5439	810.564	134.087	134.33	120.359	21.991	14.4215	0.458327	43.5273	16.2284	0	6.90459	762.673	72.6612	83.6518	92.1901	51.0505	11.1411	x
PCKGC_HUMAN	Phosphoenolpyruvate carboxykinase, cytosolic [GTP] OS=Homo sapiens GN=PCK1 PE=1 SV=3	6	6	262.9	0.292353	0.611449	1.39627	0.171691	Cirrho	140.532	193.744	1.37865	69948	52.2204	136.028	0	78.1053	10.6518	566.183	529.661	171.684	163.346	88.4706	27.9389	32.3593	288.693	0	59.0213	3.76313	532.731	287.022	106.913	125.117	205.378	21.5837	x
SEMG1_HUMAN	Semenogelin-1 OS=Homo sapiens GN=SEMG1 PE=1 SV=2	26	24	1608.96	0.294102	0.611449	1.7516	0.170733	Control	658.547	594.941	0.903414	52157	6.36072	302.29	0	580.521	9.26813	3052.84	99.235	695.746	273.176	685.325	126.358	3.94153	641.55	0	438.679	3.27431	2872.47	53.7752	433.264	209.242	1590.93	97.616	x
OLR1_HUMAN	Oxidized low-density lipoprotein receptor 1 OS=Homo sapiens GN=OLR1 PE=1 SV=1	3	3	145.21	0.294424	0.611449	6.28077	0.170558	Control	3788.68	378.361	0.099866	31453	0	291.921	0	22409.7	30.5332	0	608.038	95.271	2207.21	87.2337	18.3454	0	619.545	0	16934.2	10.787	0	329.494	59.3283	1690.63	202.507	14.1724	x
MYO1C_HUMAN	Unconventional myosin-Ic OS=Homo sapiens GN=MYO1C PE=1 SV=4	10	8	495.71	0.294567	0.611449	3.21952	0.17048	Cirrho	1578.93	3872.13	2.45237	122461	1685.85	354.667	861.931	624.64	1837.64	4108.88	17626.1	1440.75	814.919	858.26	4677.04	1044.67	752.711	332.571	472.018	649.213	3866.11	9551.53	897.2	624.194	1992.39	3613.16	x
A1AG1_HUMAN	Alpha-1-acid glycoprotein 1 OS=Homo sapiens GN=ORM1 PE=1 SV=1	4	3	272.42	0.295566	0.611449	1.90928	0.169938	Cirrho	1174.4	2143.4	1.8251	23725	275.482	299.253	141.305	104.923	157.363	6068.09	953.943	501.565	77.4206	3242.83	6435.57	170.707	635.105	54.5217	79.2869	55.5942	5709.56	516.939	312.341	59.3009	7527.99	4971.69	x
PRDX5_HUMAN	Peroxiredoxin-5, mitochondrial OS=Homo sapiens GN=PRDX5 PE=1 SV=4	2	2	110.54	0.296665	0.611449	Infinity	0.169345	Cirrho	0	11.9176	#DIV/0!	22301	0	0	0	0	0	0	0	0	0	95.3407	0	0	0	0	0	0	0	0	0	0	221.326	0	x
[truncated: 384 more rows]

## Sheet: Orbitrap-PG
														Normalized abundance														Raw abundance
[truncated: 653 more rows]

[truncated: 1 more sheets: Differential Proteins-PG ]
