# Supplementary material for: Could Protein Content of Urinary Extracellular Vesicles be Useful to Detect Alcoholic Liver Disease and Assess Hepatocarcinoma Risk?
Source: Preprints.org preprint supplement (doi:10.20944/preprints202102.0069.v1), 2021-02-01
Supplement: Supplementary file 2 [file Table S1. Clinical samples.xlsx]

## Sheet: Table S1. Clinical samples
			SCORES PARAMETERS		SCORES
Cohort	Individual	Obsevations	Age (years)	Sex	Model of End-Stage Liver Disease (MELD)	Child-Pugh
1	1	NO CIRRHOSIS NO HCC	36	Male	6	A
1	2	NO CIRRHOSIS NO HCC	72	Male	6	A
1	3	NO CIRRHOSIS NO HCC	87	Male	6	A
1	4	NO CIRRHOSIS NO HCC	61	Male	6	A
1	5	NO CIRRHOSIS NO HCC	52	Female	6	A
1	6	NO CIRRHOSIS NO HCC	80	Female	7	A
1	7	NO CIRRHOSIS NO HCC	38	Male	7	A
1	8	NO CIRRHOSIS NO HCC	41	Female	7	A
1	9	NO CIRRHOSIS NO HCC	60	Male	7	A
1	10	NO CIRRHOSIS NO HCC	39	Female	7	A
1	11	NO CIRRHOSIS NO HCC	65	Male	7	A
1	12	NO CIRRHOSIS NO HCC	22	Female	7	A
1	13	NO CIRRHOSIS NO HCC	81	Male	8	A
1	14	NO CIRRHOSIS NO HCC	81	Male	8	A
1	15	NO CIRRHOSIS NO HCC	46	Male	8	A
1	16	NO CIRRHOSIS NO HCC	82	Male	8	A
1	17	NO CIRRHOSIS NO HCC	76	Male	8	A
1	18	NO CIRRHOSIS NO HCC	62	Female	8	A
1	19	NO CIRRHOSIS NO HCC	18	Male	8	A
1	20	NO CIRRHOSIS NO HCC	81	Male	12	A
1	21	NO CIRRHOSIS NO HCC	80	Female	12	A
1	22	CIRRHOSIS NO HCC	65	Male	8	A
1	23	CIRRHOSIS NO HCC	52	Female	8	A
1	24	CIRRHOSIS NO HCC	75	Female	9	A
1	25	CIRRHOSIS NO HCC	67	Male	9	A
1	26	CIRRHOSIS NO HCC	80	Male	10	A
1	27	CIRRHOSIS + HCC	70	Male	11	A
1	28	CIRRHOSIS NO HCC	83	Male	11	A
1	29	CIRRHOSIS NO HCC	81	Male	12	A
1	30	CIRRHOSIS NO HCC	67	Female	16	A
1	31	CIRRHOSIS NO HCC	75	Female	18	A
1	32	CIRRHOSIS NO HCC	58	Male	14	B
1	33	CIRRHOSIS + HCC	59	Male	16	B
1	34	CIRRHOSIS NO HCC	69	Male	16	B
1	35	CIRRHOSIS NO HCC	50	Male	16	B
1	36	CIRRHOSIS NO HCC	63	Female	21	B
1	37	CIRRHOSIS NO HCC	56	Male	25	B
1	38	CIRRHOSIS NO HCC	69	Male	25	B
1	39	CIRRHOSIS NO HCC	67	Male	27	B
1	40	CIRRHOSIS NO HCC	37	Female	11	C
1	41	CIRRHOSIS NO HCC	58	Male	18	C
1	42	CIRRHOSIS NO HCC	49	Female	24	C
2	1	NO CIRRHOSIS NO HCC	28	Female	6	A
2	2	NO CIRRHOSIS NO HCC	43	Female	6	A
2	3	NO CIRRHOSIS NO HCC	29	Female	6	A
2	4	NO CIRRHOSIS NO HCC	31	Female	6	A
2	5	NO CIRRHOSIS NO HCC	31	Female	7	A
2	6	NO CIRRHOSIS NO HCC	27	Male	7	A
2	7	CIRRHOSIS NO HCC	58	Male	6	A
2	8	CIRRHOSIS NO HCC	69	Female	8	A
2	9	CIRRHOSIS NO HCC	73	Male	8	A
2	10	CIRRHOSIS NO HCC	56	Male	10	A
2	11	CIRRHOSIS NO HCC	43	Female	8	B
2	12	CIRROSIS + HCC after 2 years	58	Male	16	B
2	13	CIRRHOSIS + HCC	48	Male	24	B
2	14	CIRRHOSIS NO HCC	46	Female	19	C
